# Supplementary material for: Glucocorticoid receptor quaternary structure drives chromatin occupancy and transcriptional outcome
Source: HighWire-hosted journal article supplement (doi:10.1101/gr.244814.118), 2019-07-23
Supplement: Supplemental_Material.docx [file Supplemental_Material.docx]

**Supplemental material**

**Glucocorticoid Receptor Quaternary Structure Drives**

**Chromatin Occupancy and Transcriptional Outcome**

Ville Paakinaho, Thomas A. Johnson, Diego M. Presman, Gordon L. Hager

**Table of contents**

- **SUPPLEMENTAL Figures S1-S10**
- **SUPPLEMENTAL METHODS**
- **SUPPLEMENTAL References**


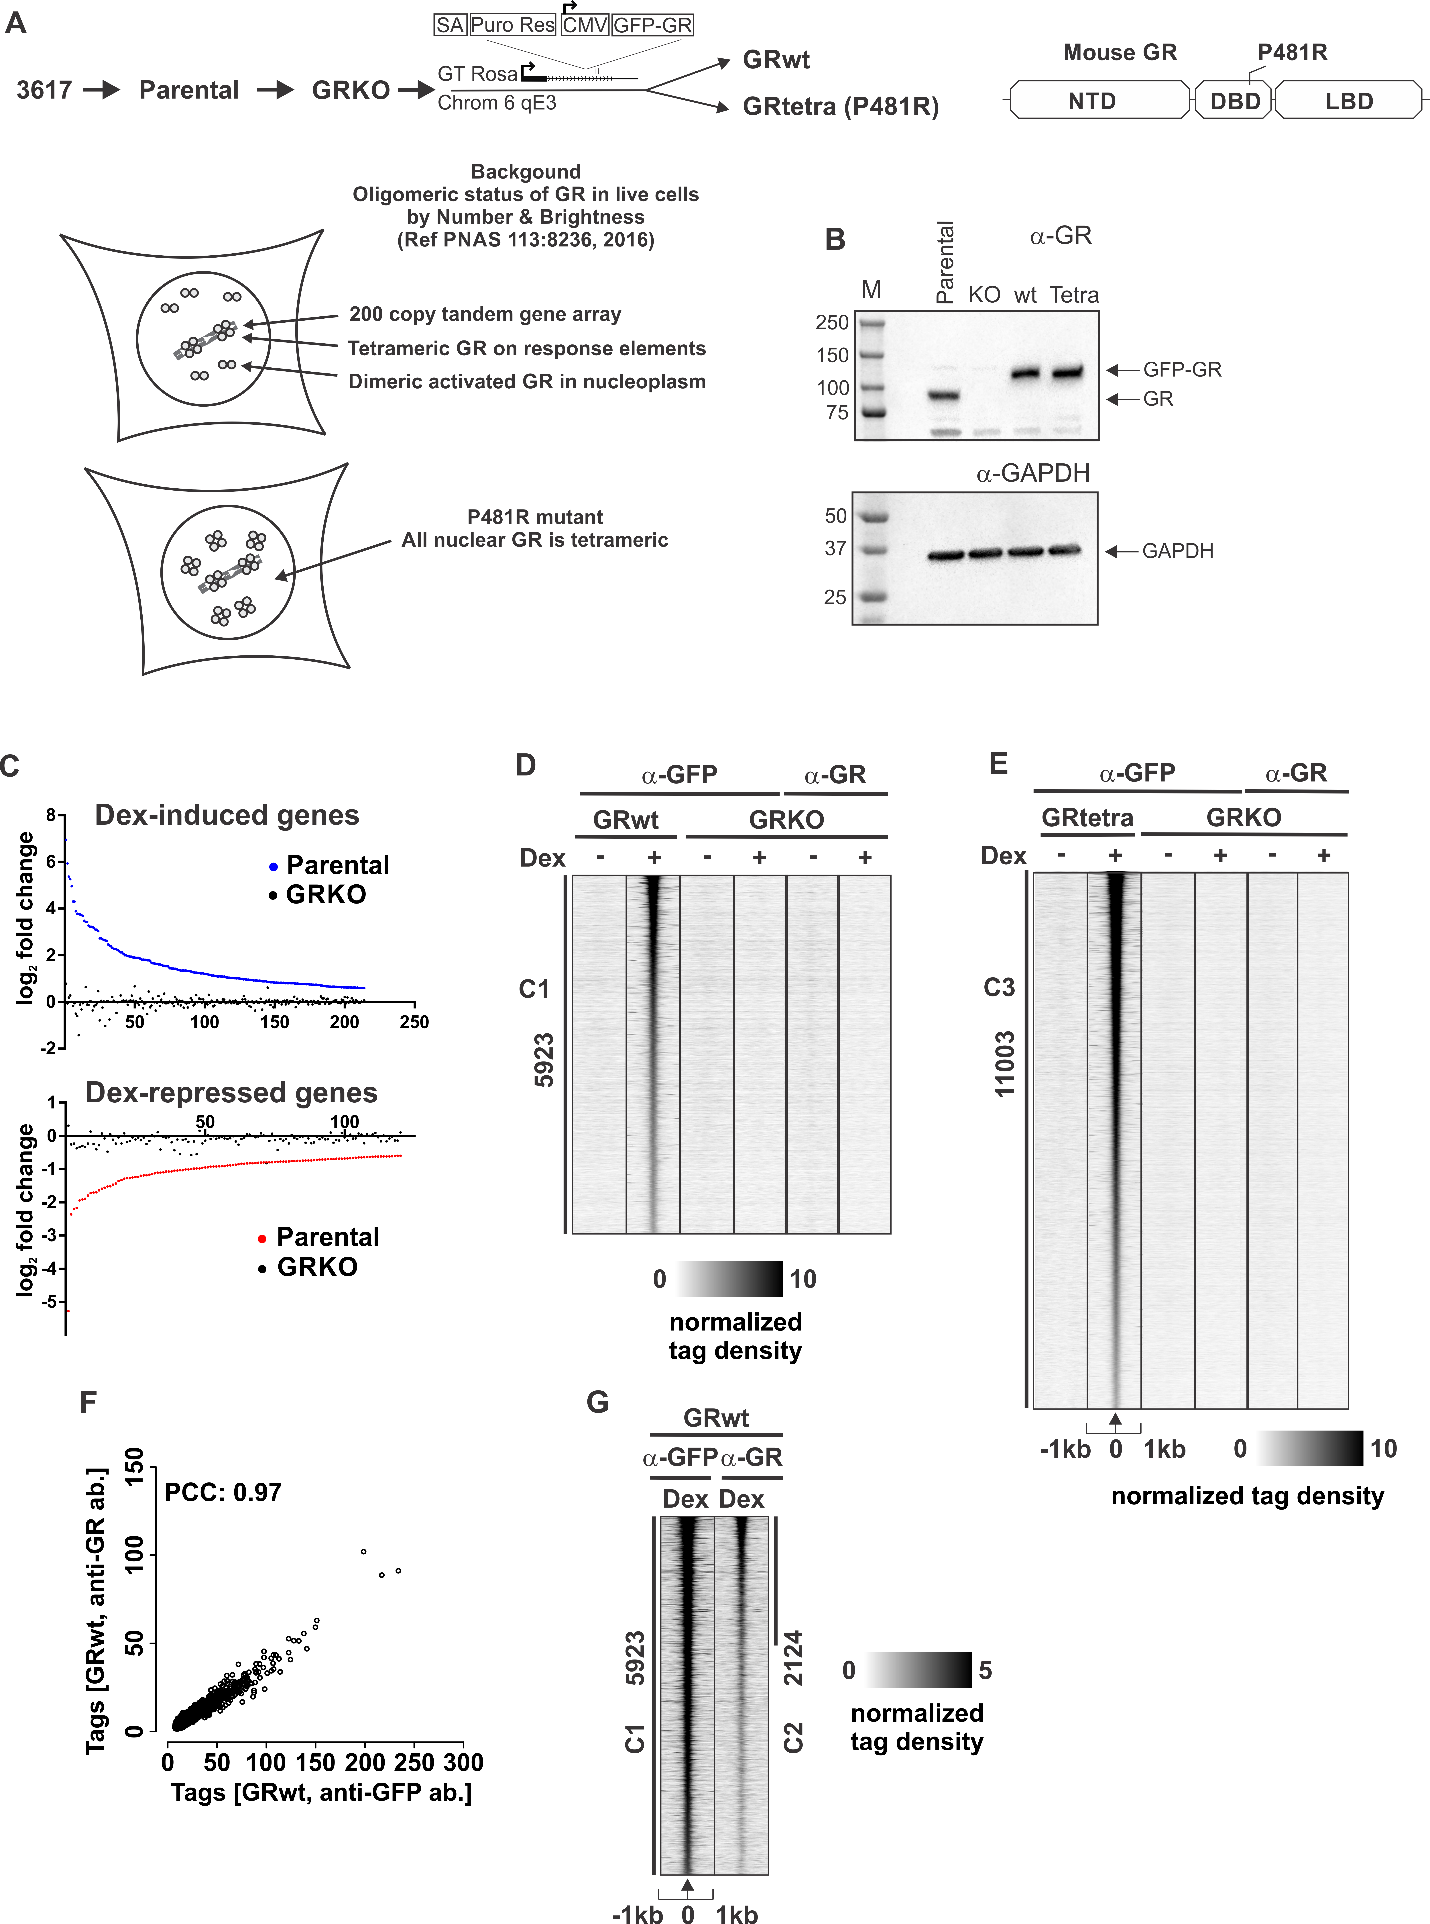


**Supplemental Figure S1**

**Supplemental Figure S1**. **Generation and validation of GR mutant cell lines**. (A) The parental and GRKO cell lines were derived from a C127 murine cell line (3617). The parental cell line contains endogenous GR while the GRKO has endogenous GR knocked out via CRISPR-Cas9. The wild-type or GRtetra (GR-P481R) of mouse GFP-GR were re-introduced into the GRKO line where each GR type is constitutively expressed. Cartoon highlights the specific mutation used and the receptor’s stable integration to GT Rosa locus. Cartoon also summarized the wildtype and P481R GR status in live cells by Number & Brightness assay (Presman et al. 2016). (B) Western blots for GR. GAPDH serve as a loading control. M, molecular weight marker. Endogenous GR, GFP-GR and GAPDH bands are highlighted on the right with arrows. (C) Parental or GRKO cells were treated with Dex for 2h before RNA extraction. Scatter plots of all Dex up-regulated genes in parental cells (top graph, blue) compared to GRKO (top graph, black) from RNA-seq data. Dex down-regulated genes in parental cells (bottom graph, red) compared to GRKO (bottom graph, black) from RNA-seq data. Data points are sorted from the most up-regulated (top) or most down-regulated (bottom) genes in parental cells. Y axis represent log2 fold change over the no treatment condition in the respective cell line. (D) Heat maps comparing GR binding with anti-GR and anti-GFP antibodies at GRKO cells to GRwt binding sites (C1). (E) Heat map comparing GR binding with anti-GR and anti-GFP antibodies at GRKO cells to GRtetra binding sites (C3). Each heat map represents ±1kb around the center of the GR peak. The binding intensity scale is noted below on a linear scale. (F) Correlation of ChIP-seq performed with anti-GR or anti-GFP antibodies in GFP-GRwt expressing cells. Scatter plot represents normalized tag counts with each GR peak detected using anti-GFP antibody. PCC; Pearson correlation coefficient. (G) Heat map comparing the signal intensity of GR peaks detected with anti-GFP antibody (C1) in GRwt expression cells between ChIP-seq performed with anti-GR and anti-GFP antibodies. Heat map also shows GR binding peaks detected with anti-GFP antibody (C1) and with anti-GR antibody (C2). All heatmaps are normalized to total of 10 million reads, and further to local tag density.

**Supplemental Figure S2**

**
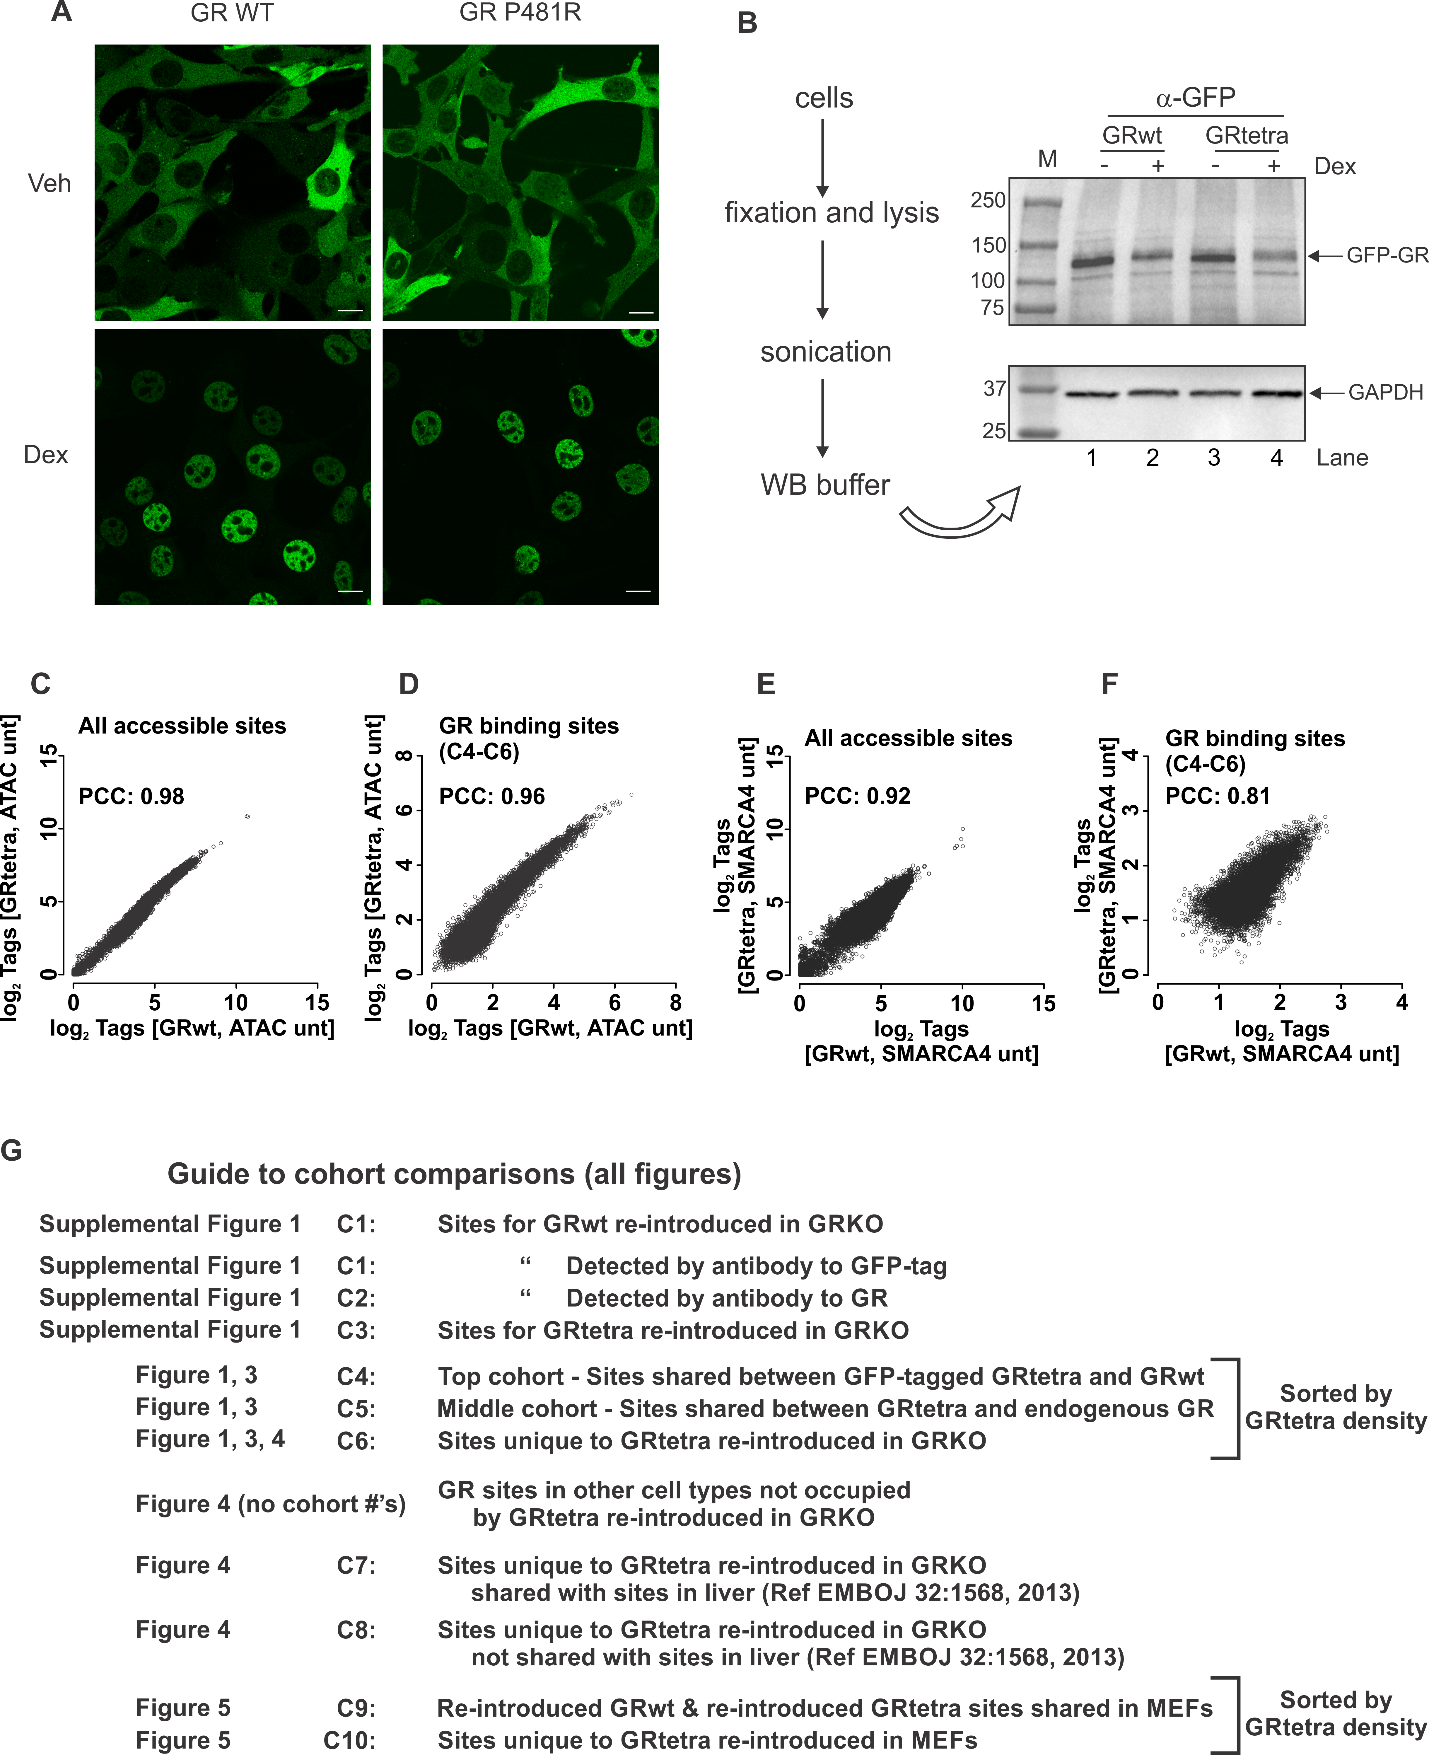
**

**Supplemental Figure S2. Characterization, antibody control, and baseline accessibility comparison between GRwt and GRtetra cell lines.** (A) Representative confocal microscopy images using the GFP-tag in GRwt and GRtetra (P481R) cell lines. Images of untreated (Veh) cells are shown on the left and images of dexamethasone (Dex, 1h) treated cells on the right. White scale bar, 10 μm. The figure shows that GRwt and GRtetra are indistinguishable regarding subcellular distribution and translocation efficiency. (B) Western blots (WB) against GFP from crosslinked and sonicated samples. GAPDH is shown as a loading control. Cells were treated with or without Dex for 1h and subsequently fixed as described in methods for ChIP. After lysis of the fixed cells, the samples were sonicated and de-crosslinked in WB loading buffer (see supplemental methods for details). Both cell lines show a stronger GFP-GR signal in the absence of hormone compared to treated samples (lanes 1 vs 2 and 3 vs 4), indicating that recovery is more efficient when hormone is not present. This result is expected, as cytoplasmic unliganded GR is easier to recover than liganded, nuclear translocated, DNA bounded GR (+dex) from fixed and sonicated samples. More importantly, GFP-GR levels between cell lines under the same condition are similar (1 vs 3 and 2 vs 4). If any, Dex-GRtetra levels appears slightly lower than Dex-GRwt (lanes 2 vs 4), consistent with more binding of GRtetra (i.e. less recovery). This control experiment shows no evidence of potential differences in detectability or stability of GRwt vs GRtetra under the ChIP protocol. (C-F) Comparison of chromatin accessibility by ATAC-seq (B-C) and SMARCA4 binding by ChIP-seq (D-E) in untreated condition between GRwt and GRtetra cells. Scatter plot represents normalized log2 tag counts of all accessible sites (C, E) or GR binding sites (C4-C6) (D, F). PCC; Pearson correlation coefficient. The comparison of all accessible sites and SMARCA4 binding sites shows that the untreated samples correlate as well as biological replicate samples, indicating that baseline accessibility and SMARCA4 binding is similar between cell lines. (G) Guide for cohort comparisons, defining all the cluster peak populations.

**
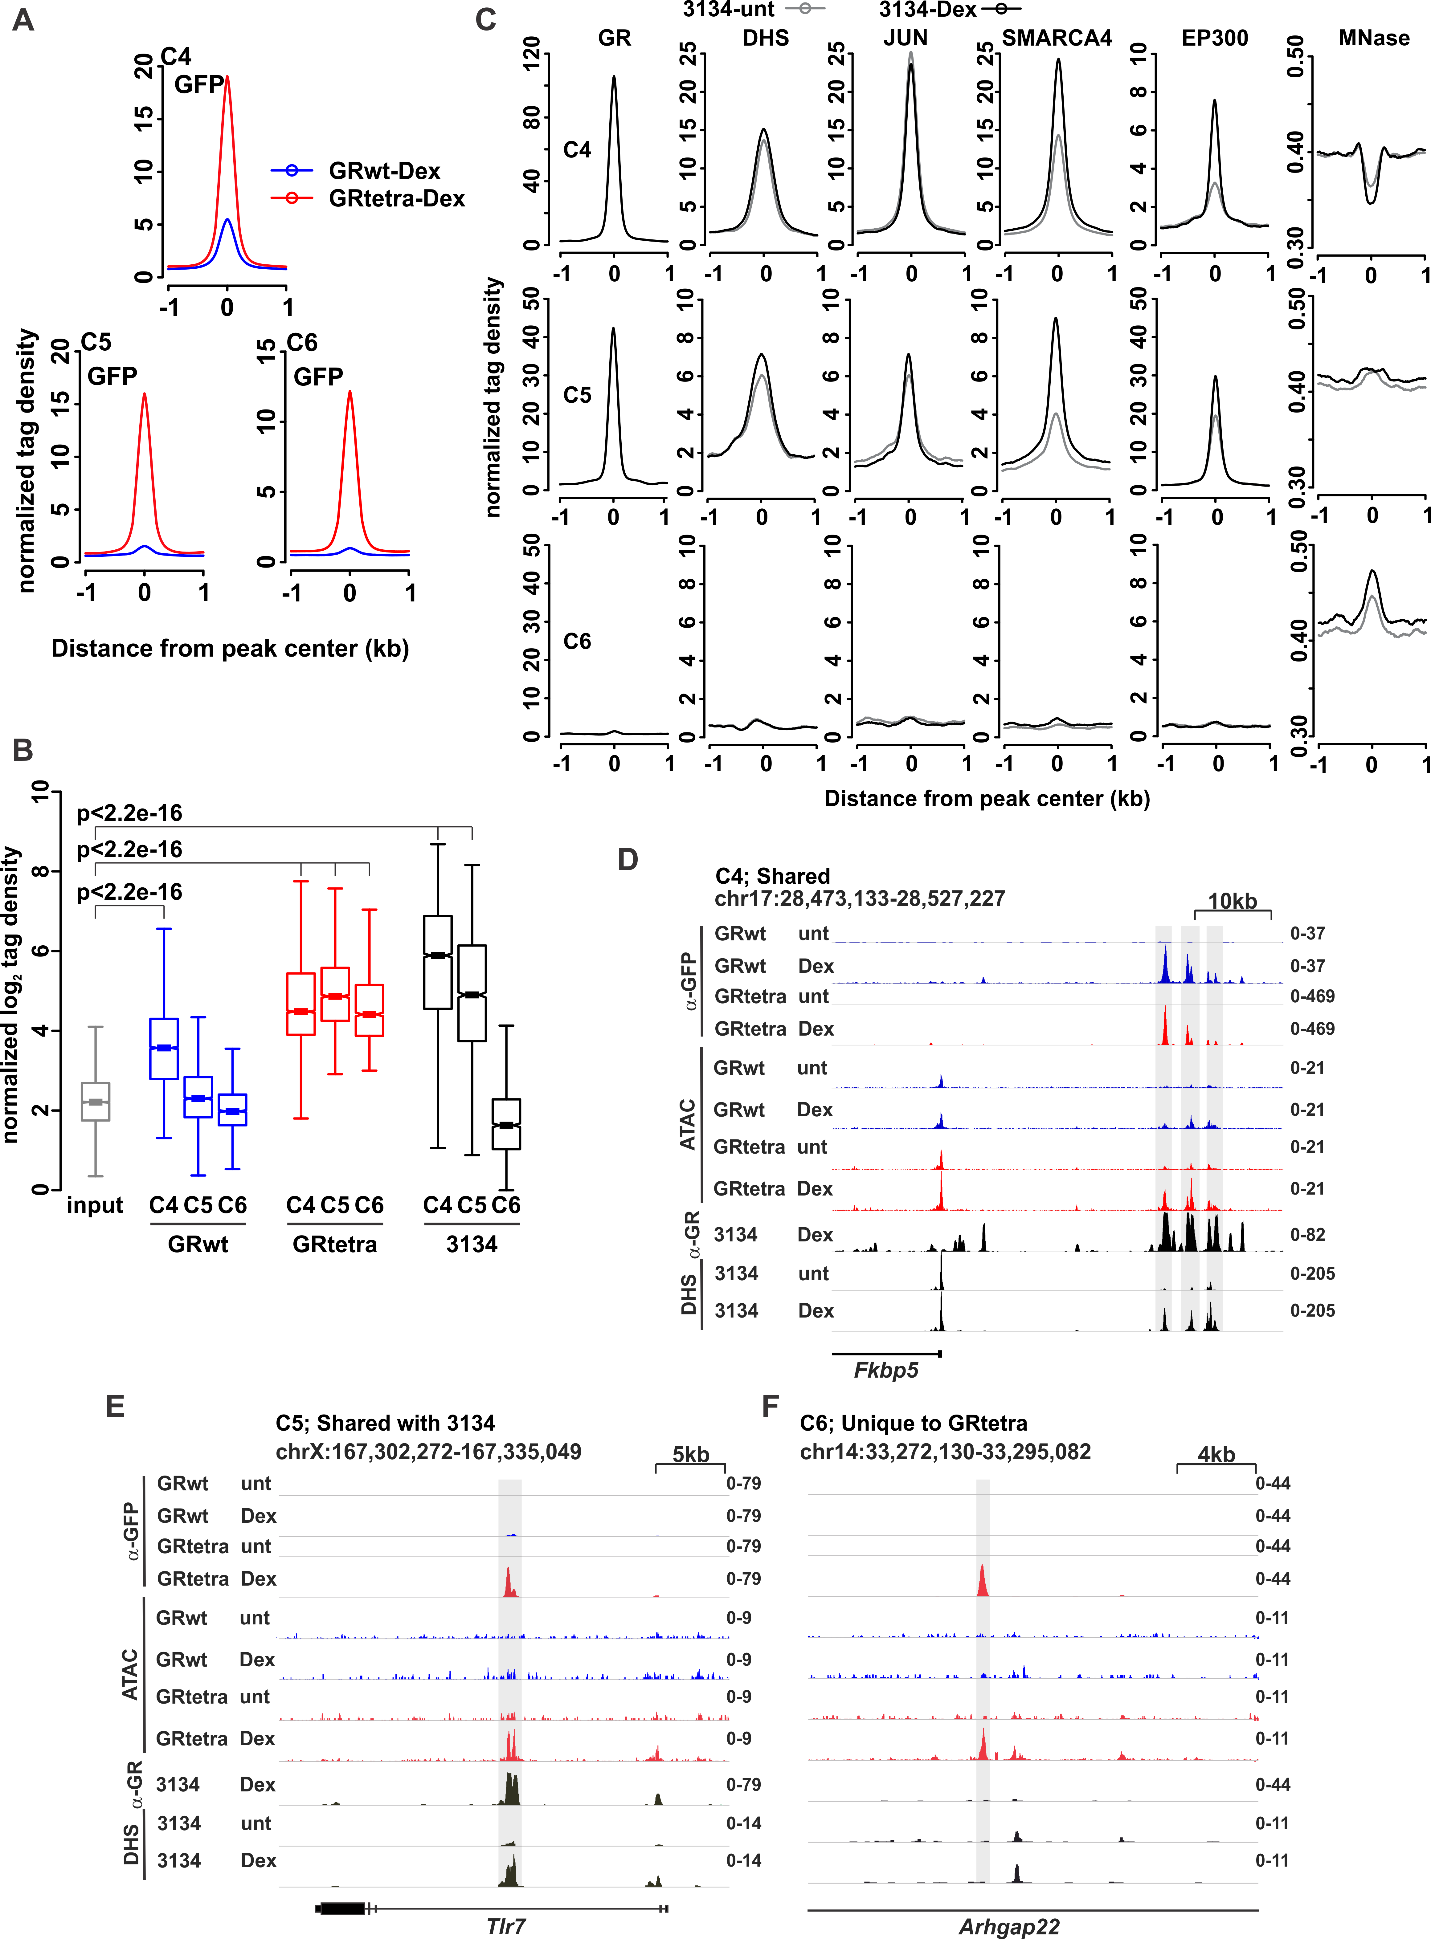
**

**Supplemental Figure S3**

**Supplemental Figure S3**. **Comparison of GRwt and GRtetra cistromes**. (A) Aggregate plots of +Dex GR binding (α-GFP) for each cluster; color indicates GR type. (B) Statistical comparison of GR enrichment to C4-C6 sites. Box plots represent normalized log2 tag density of input (grey), GRwt (blue), GRtetra (red), and endogenous GR in 3134 cells (black) to C4-C6 sites. p-values were calculated using unpaired two-sample *t-*test. All box plots are normalized to total of 10 million reads. (C) Aggregate plots of ChIP-seq, DNase-seq (DHS) or MNase-seq (MNase) data for each cluster in untreated (grey) or Dex-treated (black) 3134 cells. All aggregate plots are normalized to total of 10 million reads, and further to local tag density. (D-F) Example genome browser tracks of C4 (D), C5 (E), and C6 (F) sites. All genome browser tracks are normalized to total of 10 million reads.


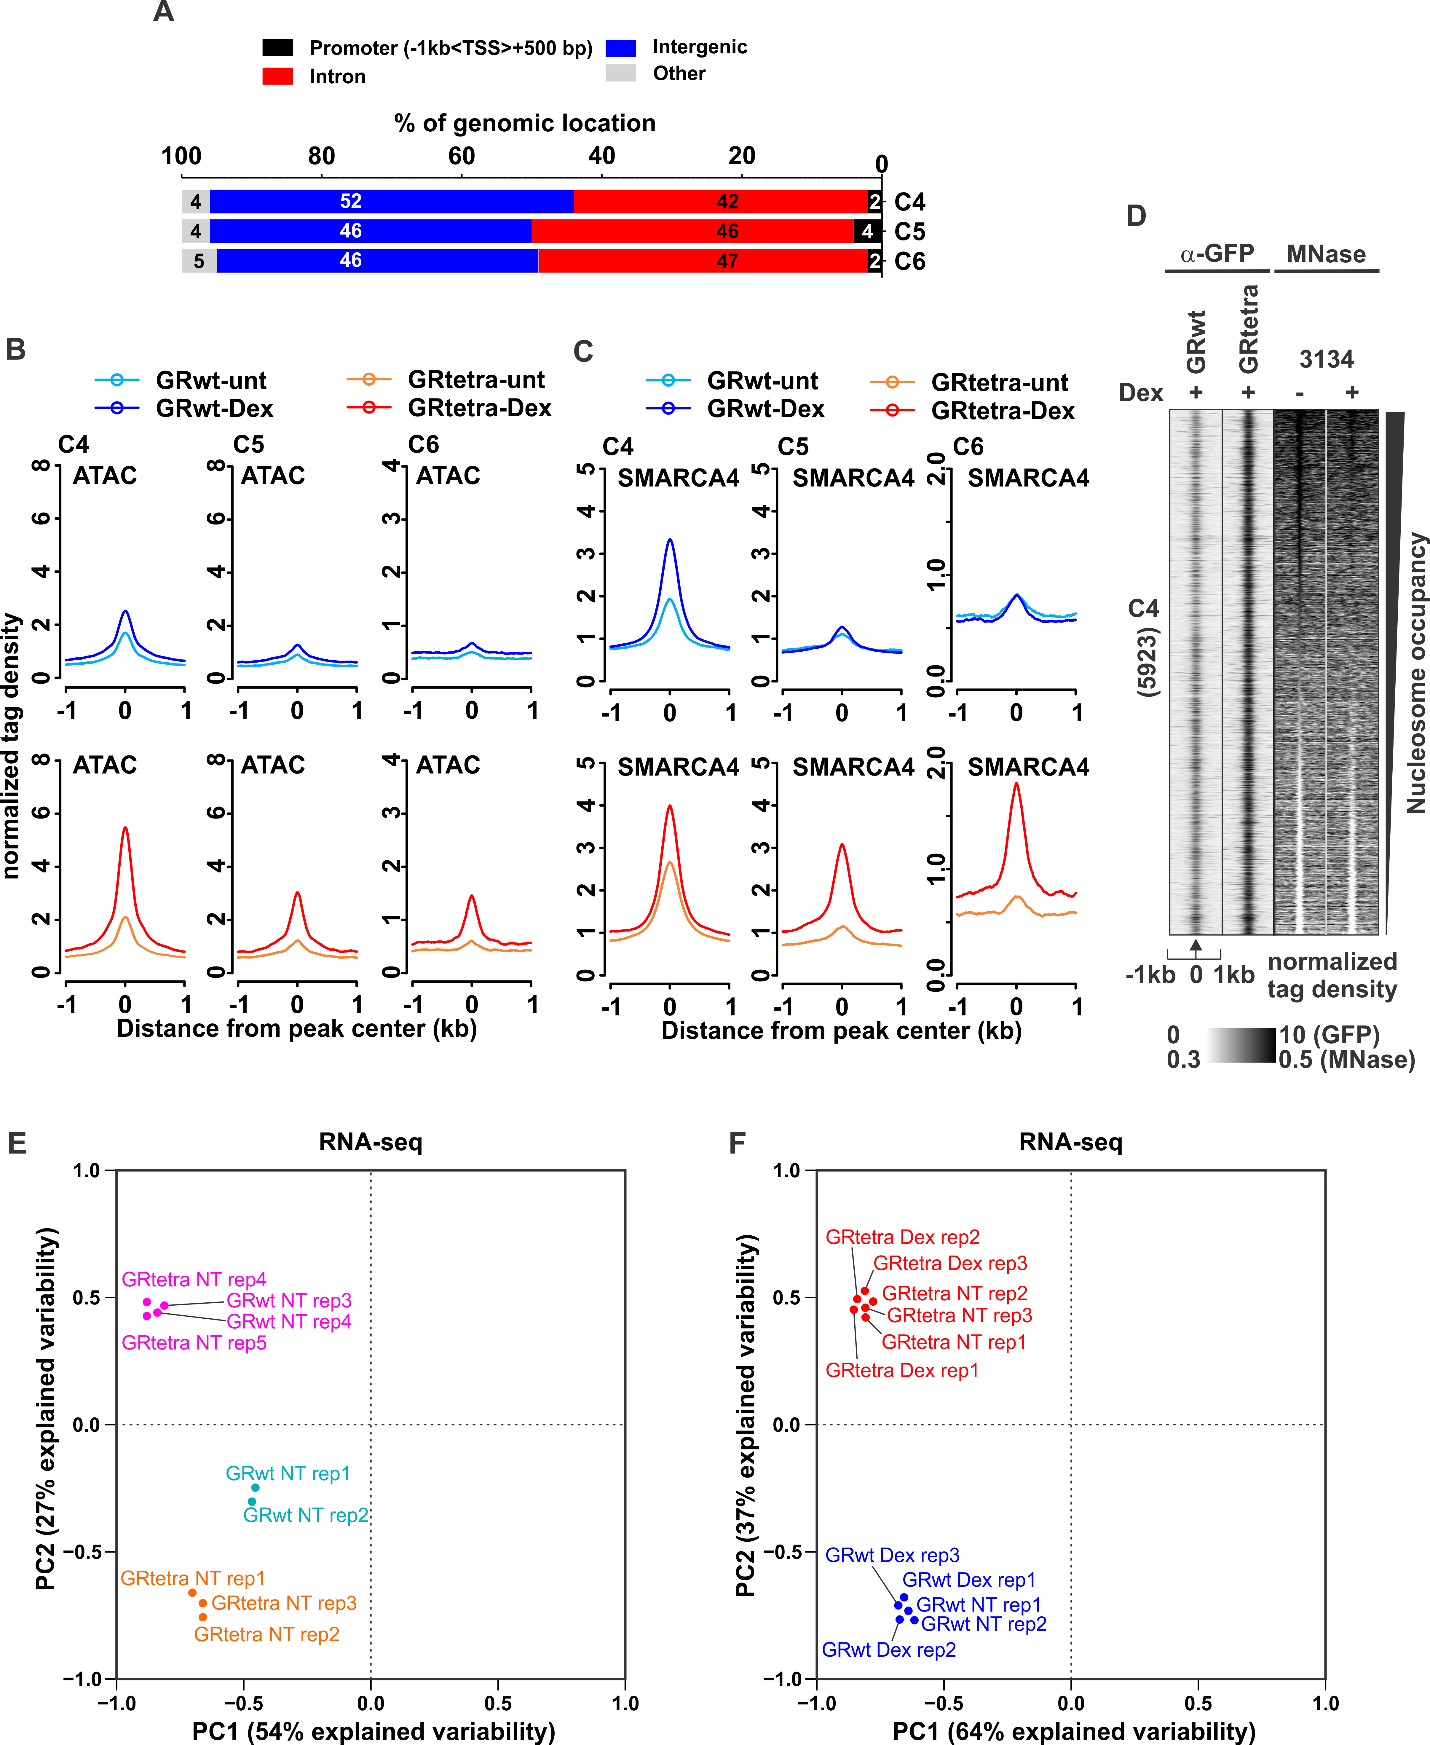


**Supplemental Figure S4**

**Supplemental Figure S4. Comparison of GRwt and GRtetra induced chromatin accessibility and baseline gene expression levels.** (A) Bar chart represents genomic location enrichment at C4-C6 sites. The percentage of enrichment in each color-coded genomic site is shown. (B) Aggregate plots of ATAC-seq tag density in GRwt (upper) or GRtetra (lower) cell lines for each GR binding cluster; color indicates treatment or GR type. (C) Aggregate plots of SMARCA4 ChIP-seq tag density in GRwt (upper) or GRtetra (lower) cell lines for each cluster; color indicates treatment or GR type. (D) Heat maps of GFP ChIP-seq from GRwt and GRtetra cells, and MNase-seq from 3134 cells in C4 sorted by nucleosome occupancy (based on MNase data) with highest nucleosome occupancy at the top. Heat maps represented as in Supplemental Fig. 1. All heat maps and aggregate plots are normalized to total of 10 million reads, and further to local tag density. (E-F) Principal component analysis (PCA) of all GRwt and GRtetra RNA-seq samples. Similar color indicates similar enrichment. Replicates of non-treated (NT) control and Dex-treated (Dex) samples were processed at the same time. Samples from one cell line were sequenced at the same time. The non-treated replicates from each cell type were processed and sequenced on different days and therefore possess more technical variability than the samples sequenced together. This is illustrated in (E), as the lower left quadrant shows that GRwt replicates, which were sequenced together, cluster together (i.e. have less variability). Same occurs with the three GRtetra replicates, which were sequenced together. Comparison of four other non-treated RNA-seq data sets that were sequenced together (GRwt NT replicates 3 and 4, GRtetra NT replicates 4 and 5, upper left quadrant) show minimal differences both within the same cell line, but also between the two cell lines. This indicates that basal gene expression differences are more likely due to technical variability than with biological differences between the cell lines. By processing and sequencing the non-treated and hormone treated samples from each cell line together, we avoided these technical complications in determining the hormone response of each GR type. This is illustrated in (F) by observing how the Dex replicates cluster closer to the NT replicates than to replicates of the different cell lines.


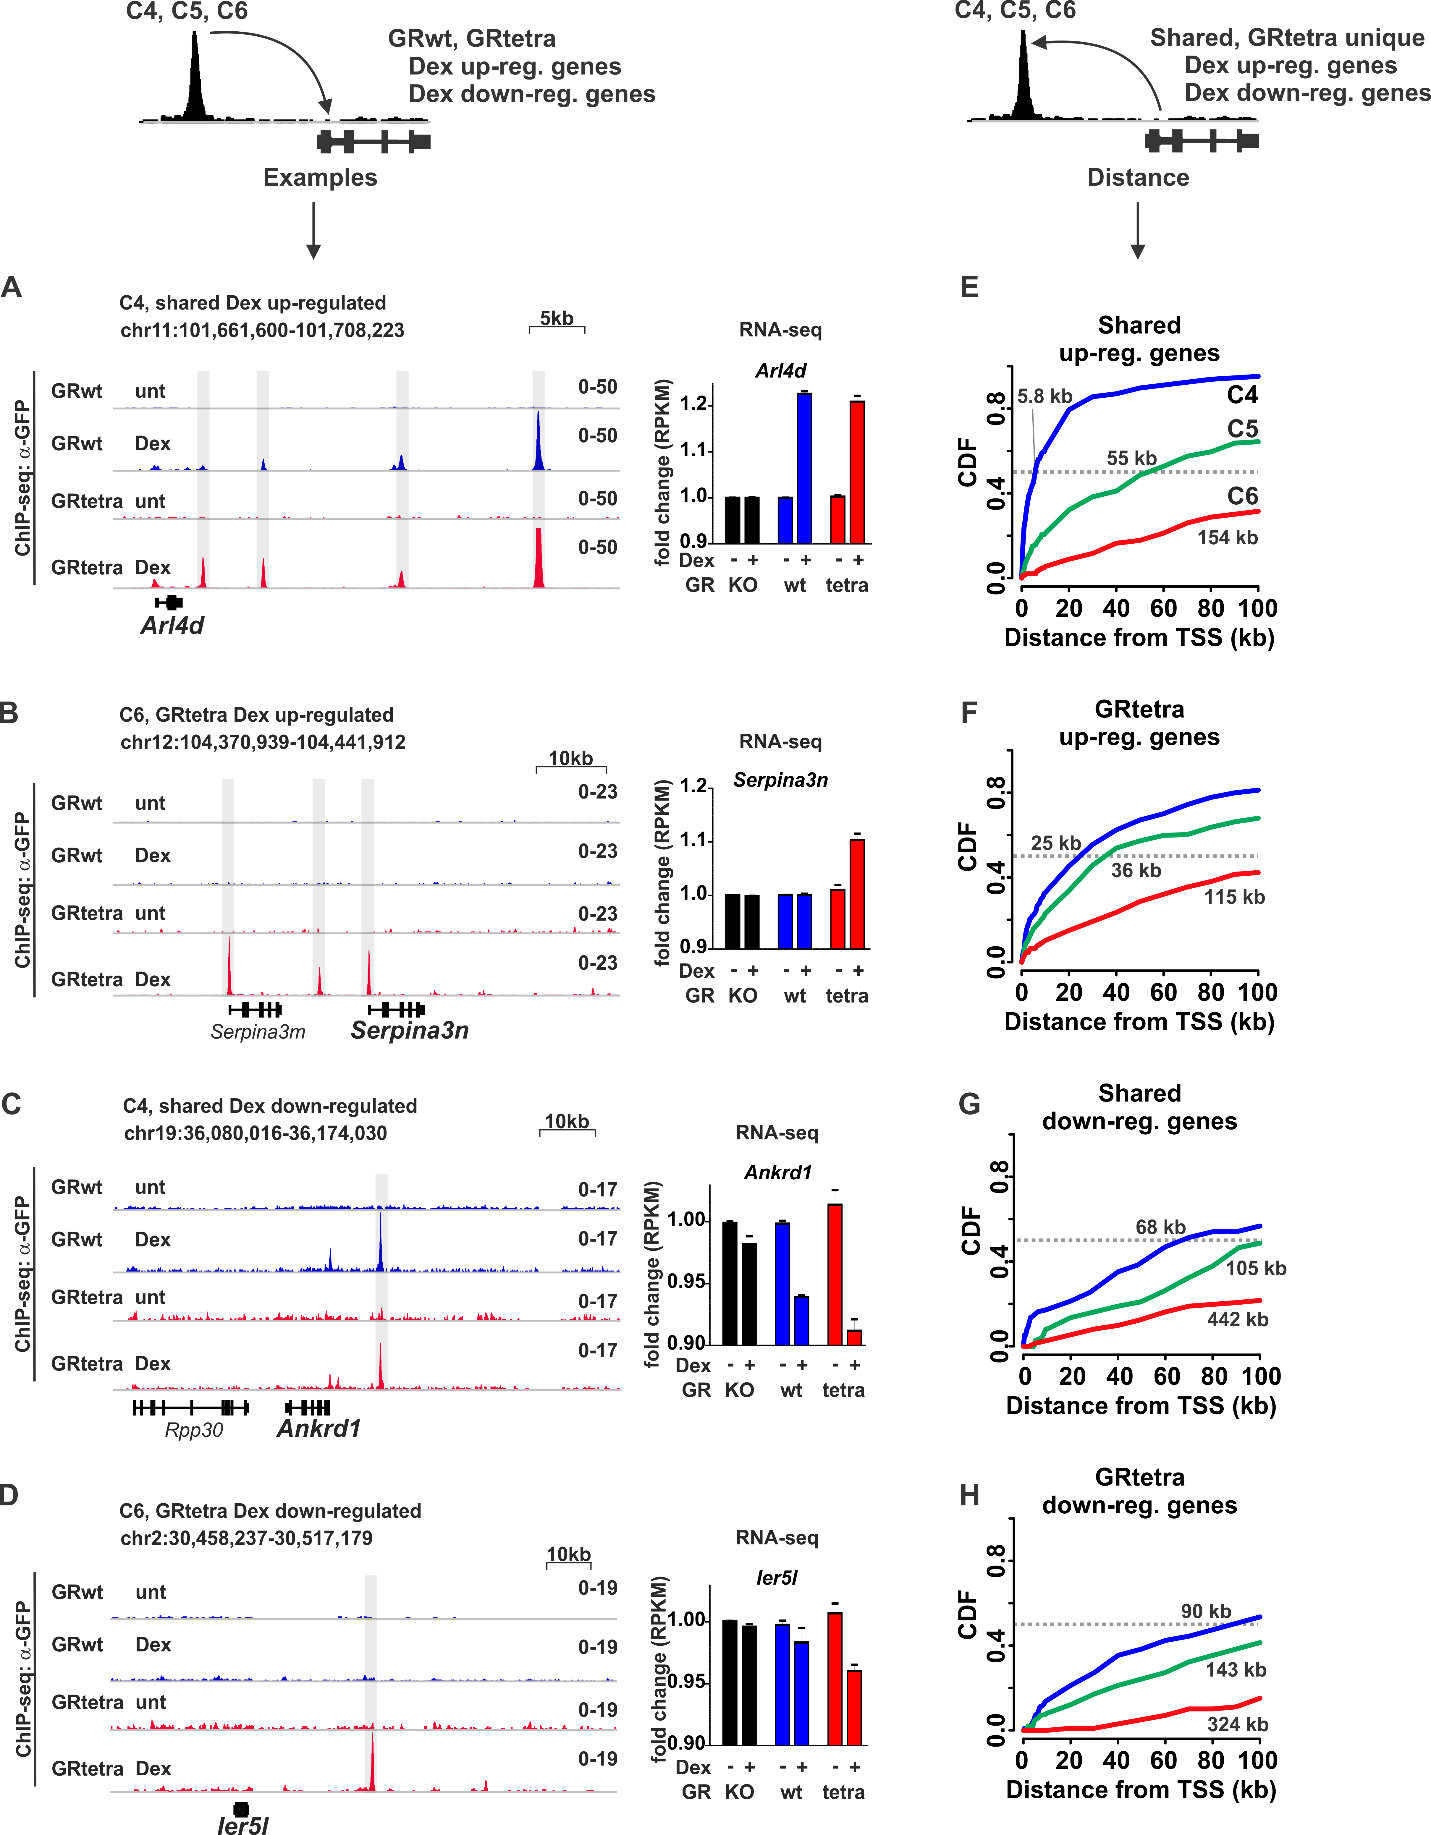


**Supplemental Figure S5**

**Supplemental Figure S5**. **Correlation of GR binding sites to Dex-regulated genes**. (A-D) Example genome browser tracks of ChIP-seq data, and bar graph representation of RNA-seq data. The latter data is shown as fold change of RNA-seq RPKM values for GRKO, GRwt, and GRtetra cells. For each cell line, non-treated sample was used as reference point. C4 sites associated with GRwt and GRtetra Dex up-regulated gene *Arld4* (A) and Dex down-regulated gene *Ankrd1* (C). C6 sites associated with exclusively GRtetra Dex up-regulated gene *Serpina3n* (B) and Dex down-regulated gene *Ier5l* (D). All genome browser tracks are normalized to total of 10 million reads. (E-H) Cumulative distribution function (CDF) between the distance of shared Dex up- (E) or down- (G) regulated gene, or GRtetra uniquely Dex up- (F) or down- (H) regulated gene and C4-C6 binding sites. Each cluster is color-coded with median distance shown for each cluster. Grey dashed line depicts median.


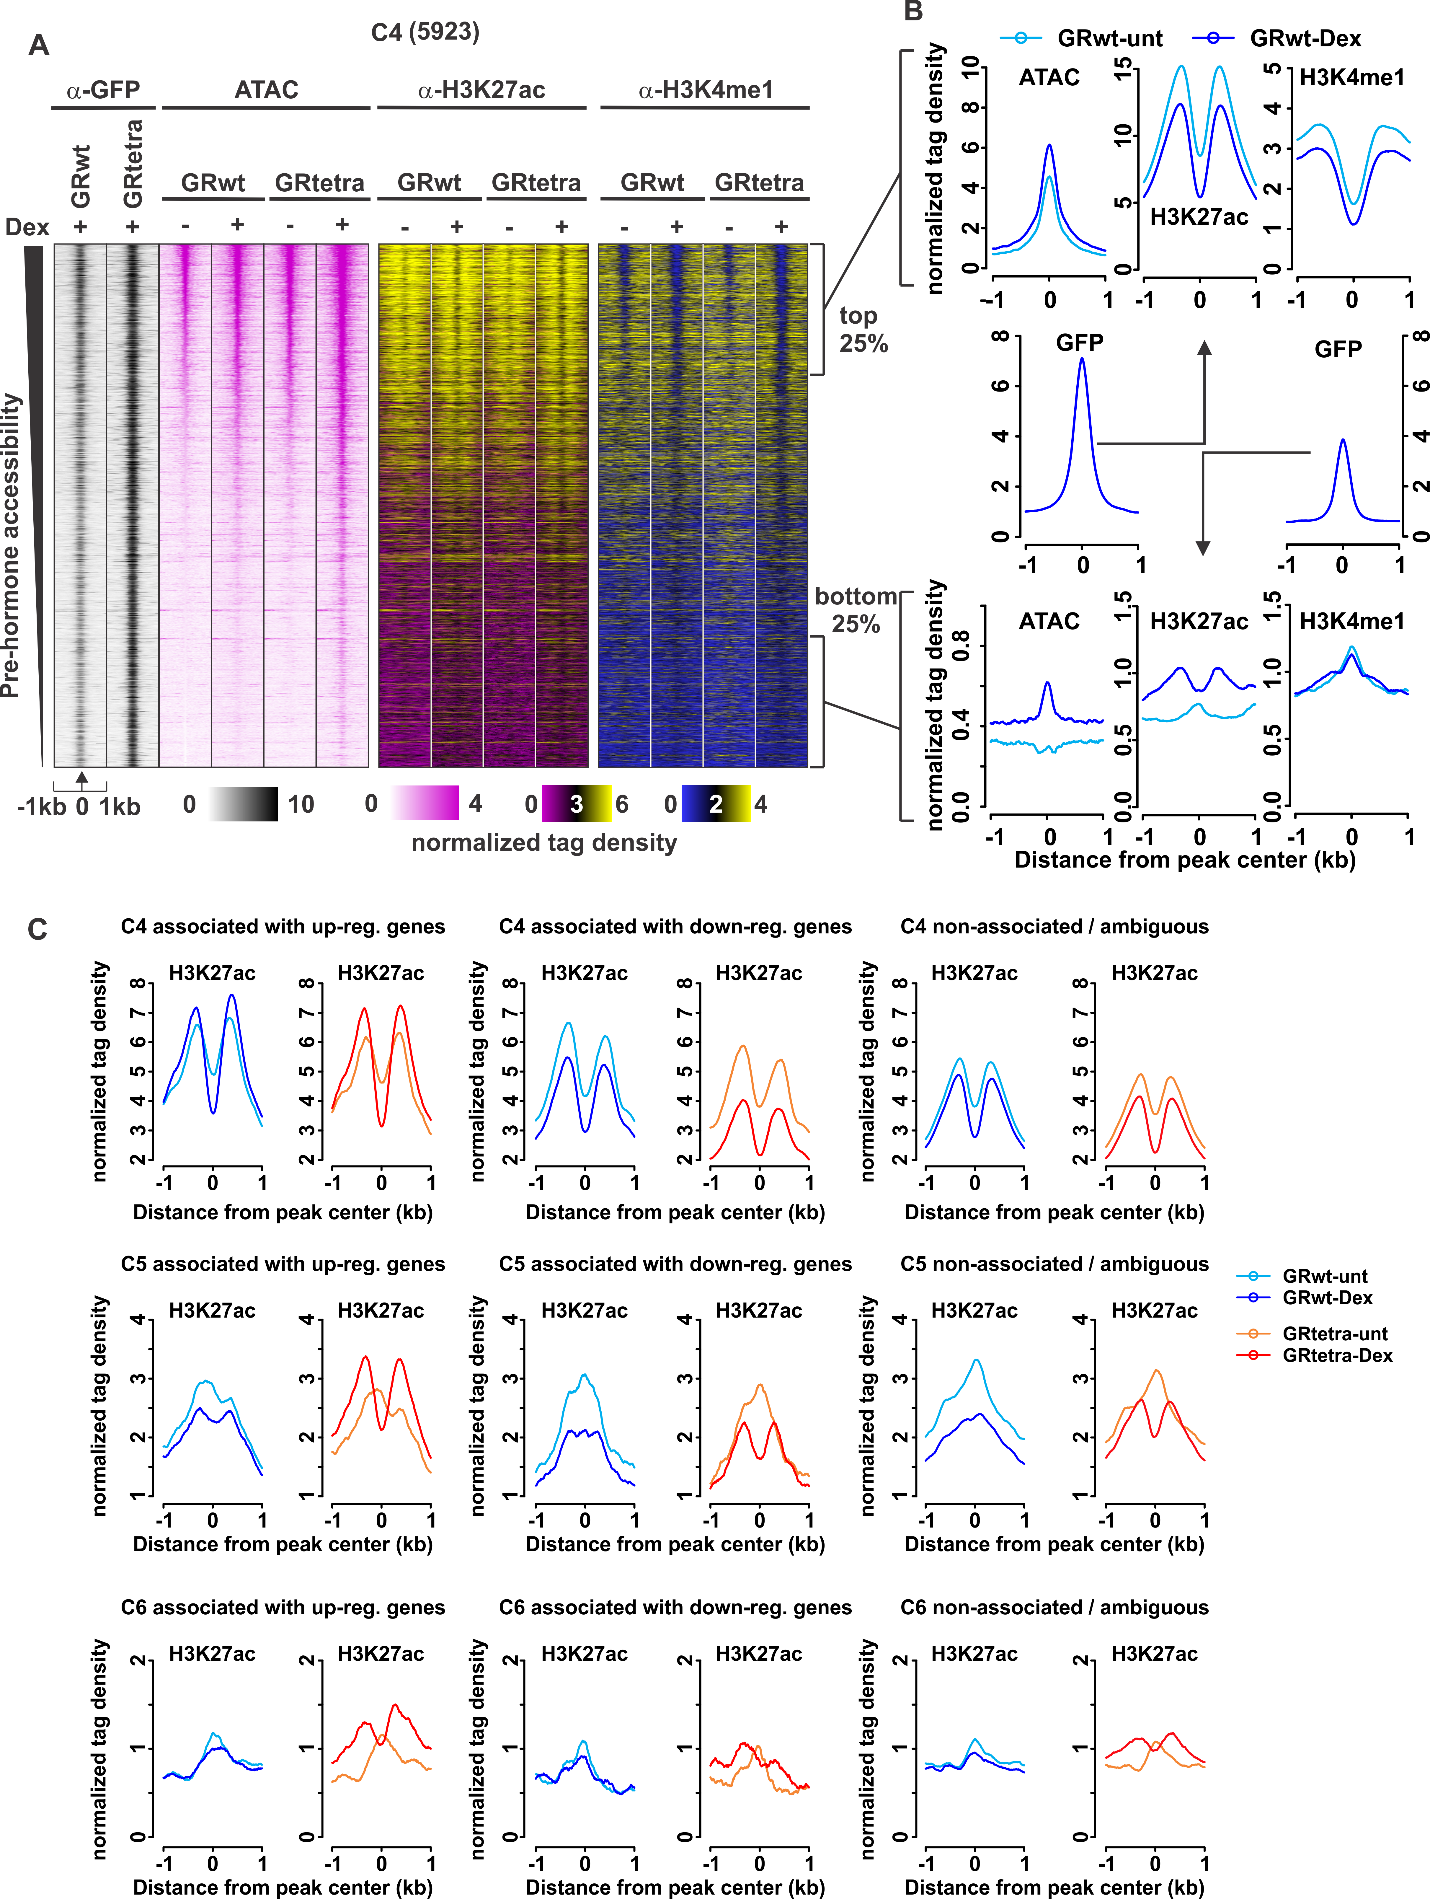


**Supplemental Figure S6**

**Supplemental Figure S6**. **H3K4me1 enrichment at C4 shared sites**. (A) Heat maps of GFP, H3K27ac, H3K4me1 ChIP-seq and ATAC-seq from GRwt and GRtetra cells in C4 sorted by pre-hormone accessibility (based on GRwt ATAC data) with highest pre-hormone accessibility at the top. Heat maps represented as in Supplemental Fig. 1. (B) Aggregate plots of ATAC-seq, H3K27ac, H3K4me1 or GFP ChIP-seq tag density in GRwt cell line at pre-accessible sites (top 25%, upper aggregate plots) or at *de novo* sites (bottom 25%, lower aggregate plots); color indicates treatment. (C) Aggregate plots of H3K27ac tag density from GRwt and GRtetra cells at C4 (top), C5 (middle), and C6 (bottom) sites associated with up-regulated genes (left), associated with down-regulated genes (middle), or non-associated/ambiguous association (right); color indicates treatment. All heatmaps and aggregate plots are normalized to total of 10 million reads, and further to local tag density.

**
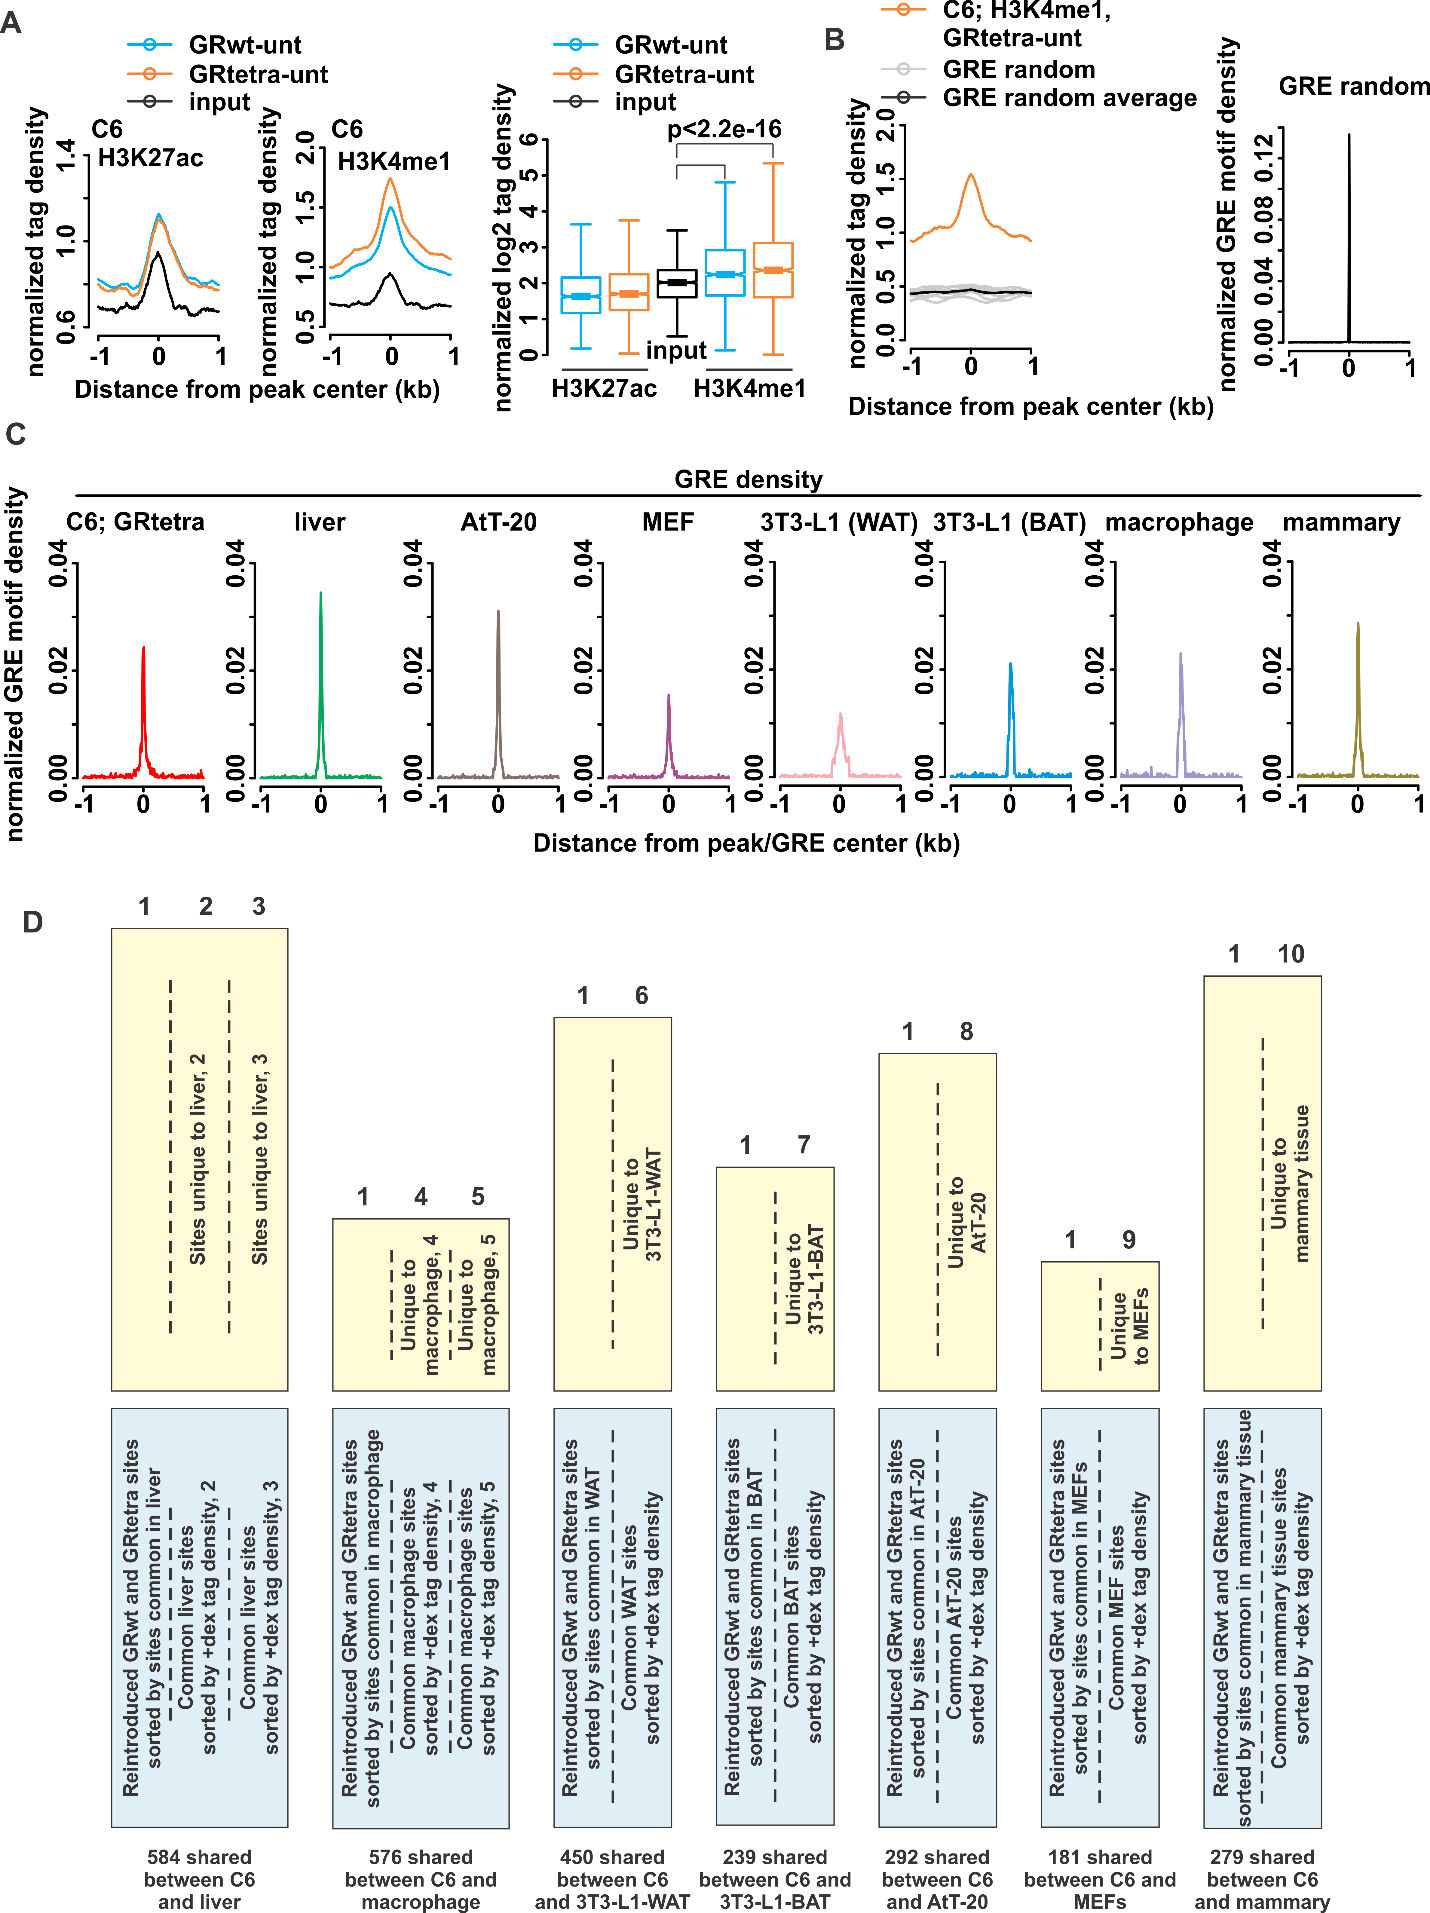
**

**Supplemental Figure S7**

**Supplemental Figure S7**. **Analysis of unique GRtetra sites to H3K4me1 data and overlap with GR data in other cell lines**. (A) Aggregate plots of H3K27ac (left), H3K4me1 (middle), and box plot of histone modification data (right) in untreated GRwt and GRtetra expressing cells at C6 sites compared to input. Box plots represent normalized log2 tag density of input (black), GRwt (light blue), and GRtetra (orange) C6 sites. p-values were calculated using unpaired two-sample *t-*test. All box plots are normalized to total of 10 million reads. (B) Aggregate plot (left) show comparison of H3K4me1 enrichment at C6 to random GREs. Aggregate plot (right) shows the enrichment of GRE at random GREs. (C) Aggregate plots showing the enrichment of GRE at C6 and GR binding sites present in other cell lines but not shared with GRtetra. All aggregate plots are normalized to total of 10 million reads, and further to local tag density. (D) Cartoon guide to GRtetra and other cell line comparisons shown in Fig. 4A.


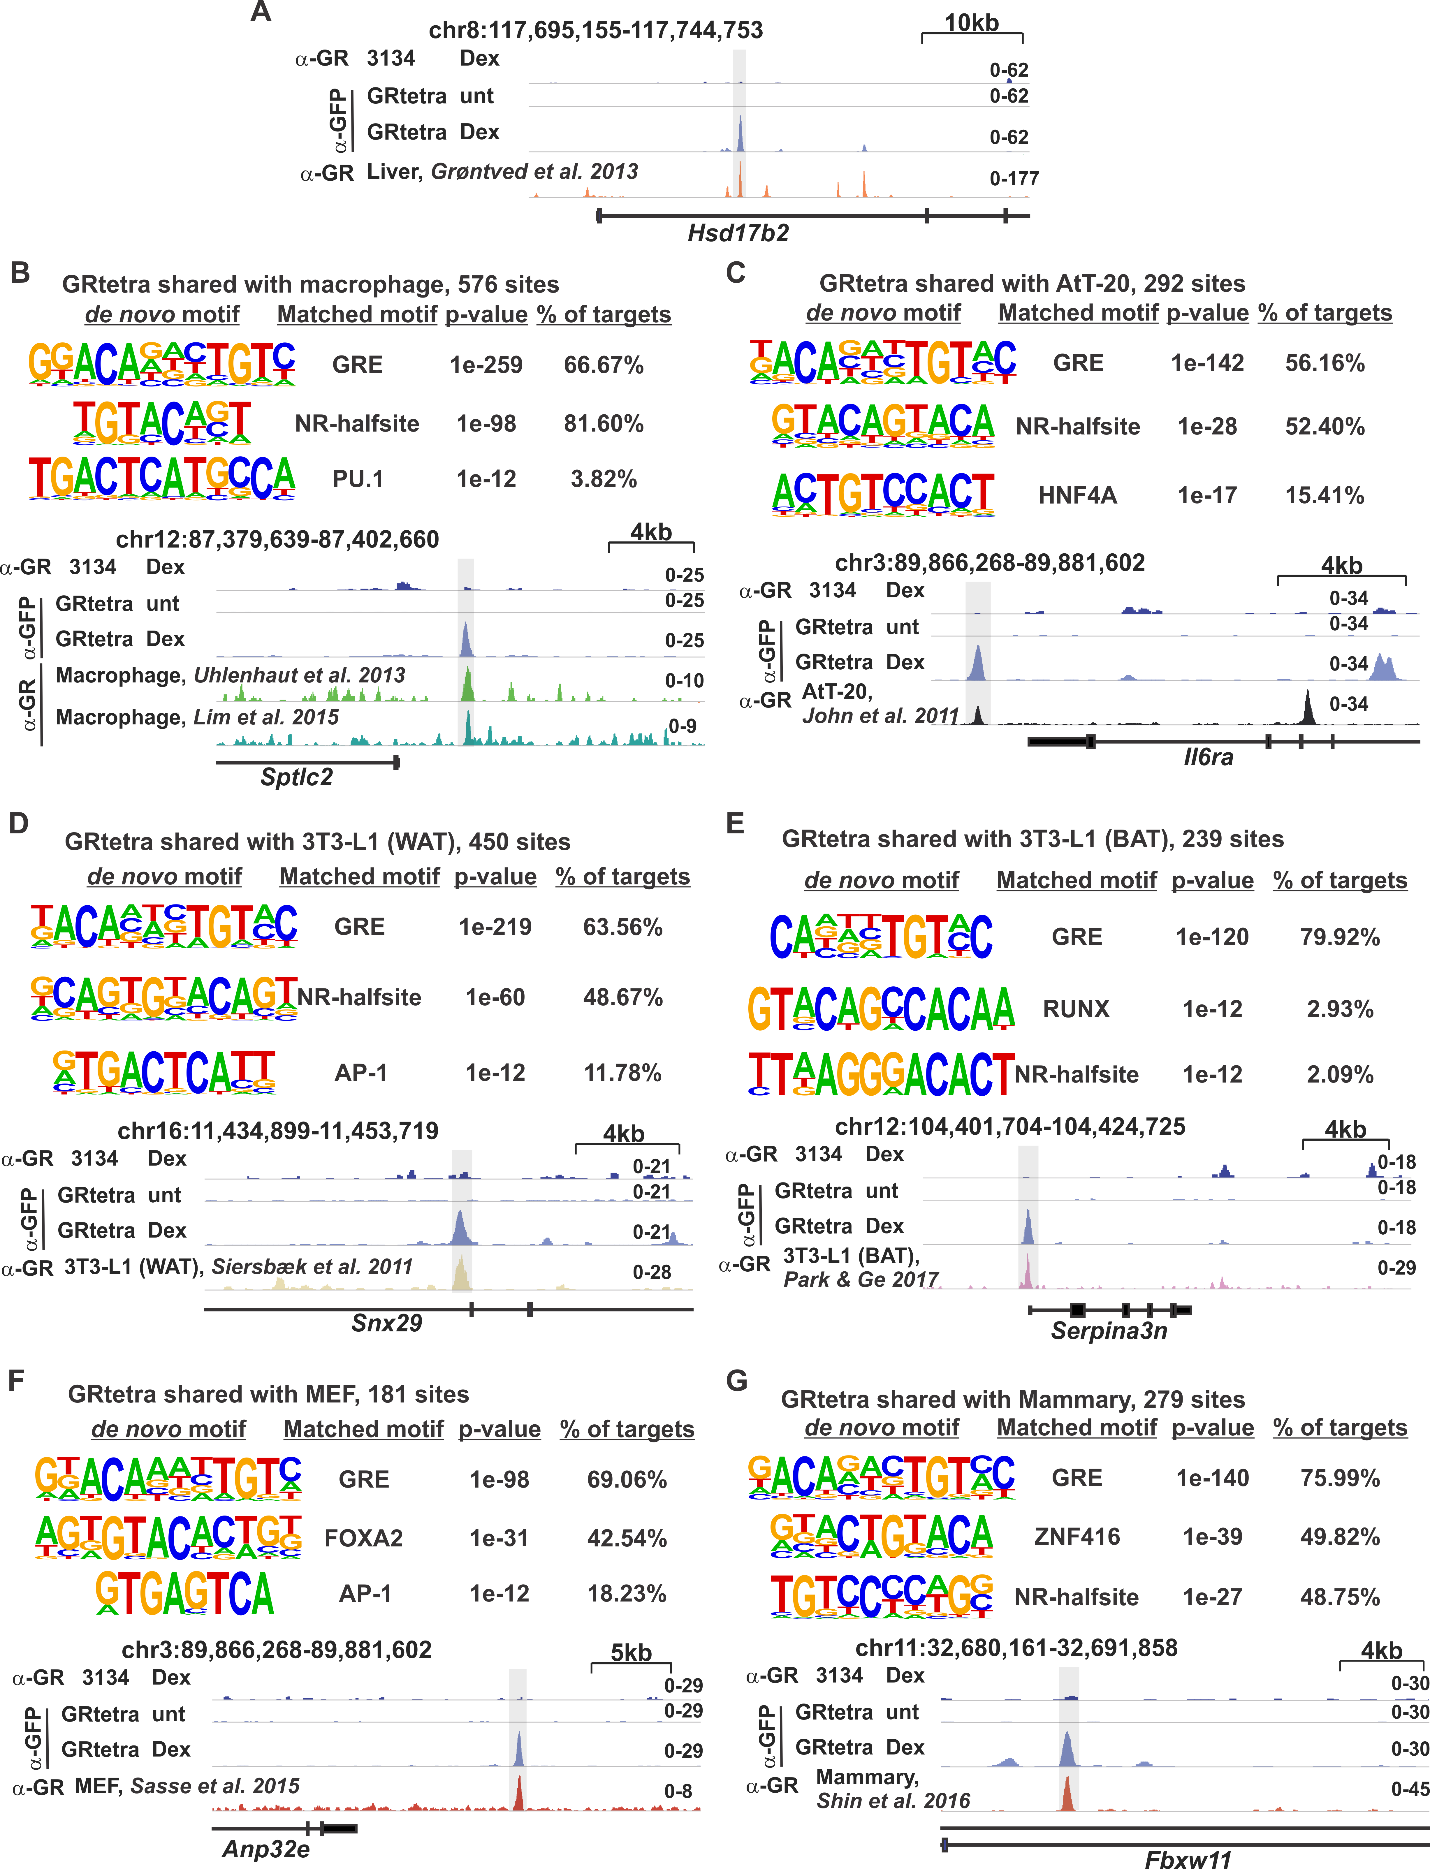


**Supplemental Figure S8**

**Supplemental Figure S8**. **Overlap of unique GRtetra sites to GR data in other cell lines.** (A) Example genome browser tracks of C6 site overlapping with GR ChIP-seq data in liver. (B-G) Intersection of C6 sites with GR ChIP-seq data in other cell types show varying overlap with (B) macrophage, (C) AtT-20, (D) 3T3-L1 differentiated towards white adipose tissue (WAT), (E) 3T3-L1 differentiated towards brown adipose tissue (BAT), (F) mouse embryonic fibroblast (MEF), and (G) mouse mammary tissue. The number of *de novo* motif enrichment and genome browser track examples of overlapping sites shown for each GR ChIP-seq data. All genome browser tracks are normalized to 10 million reads.


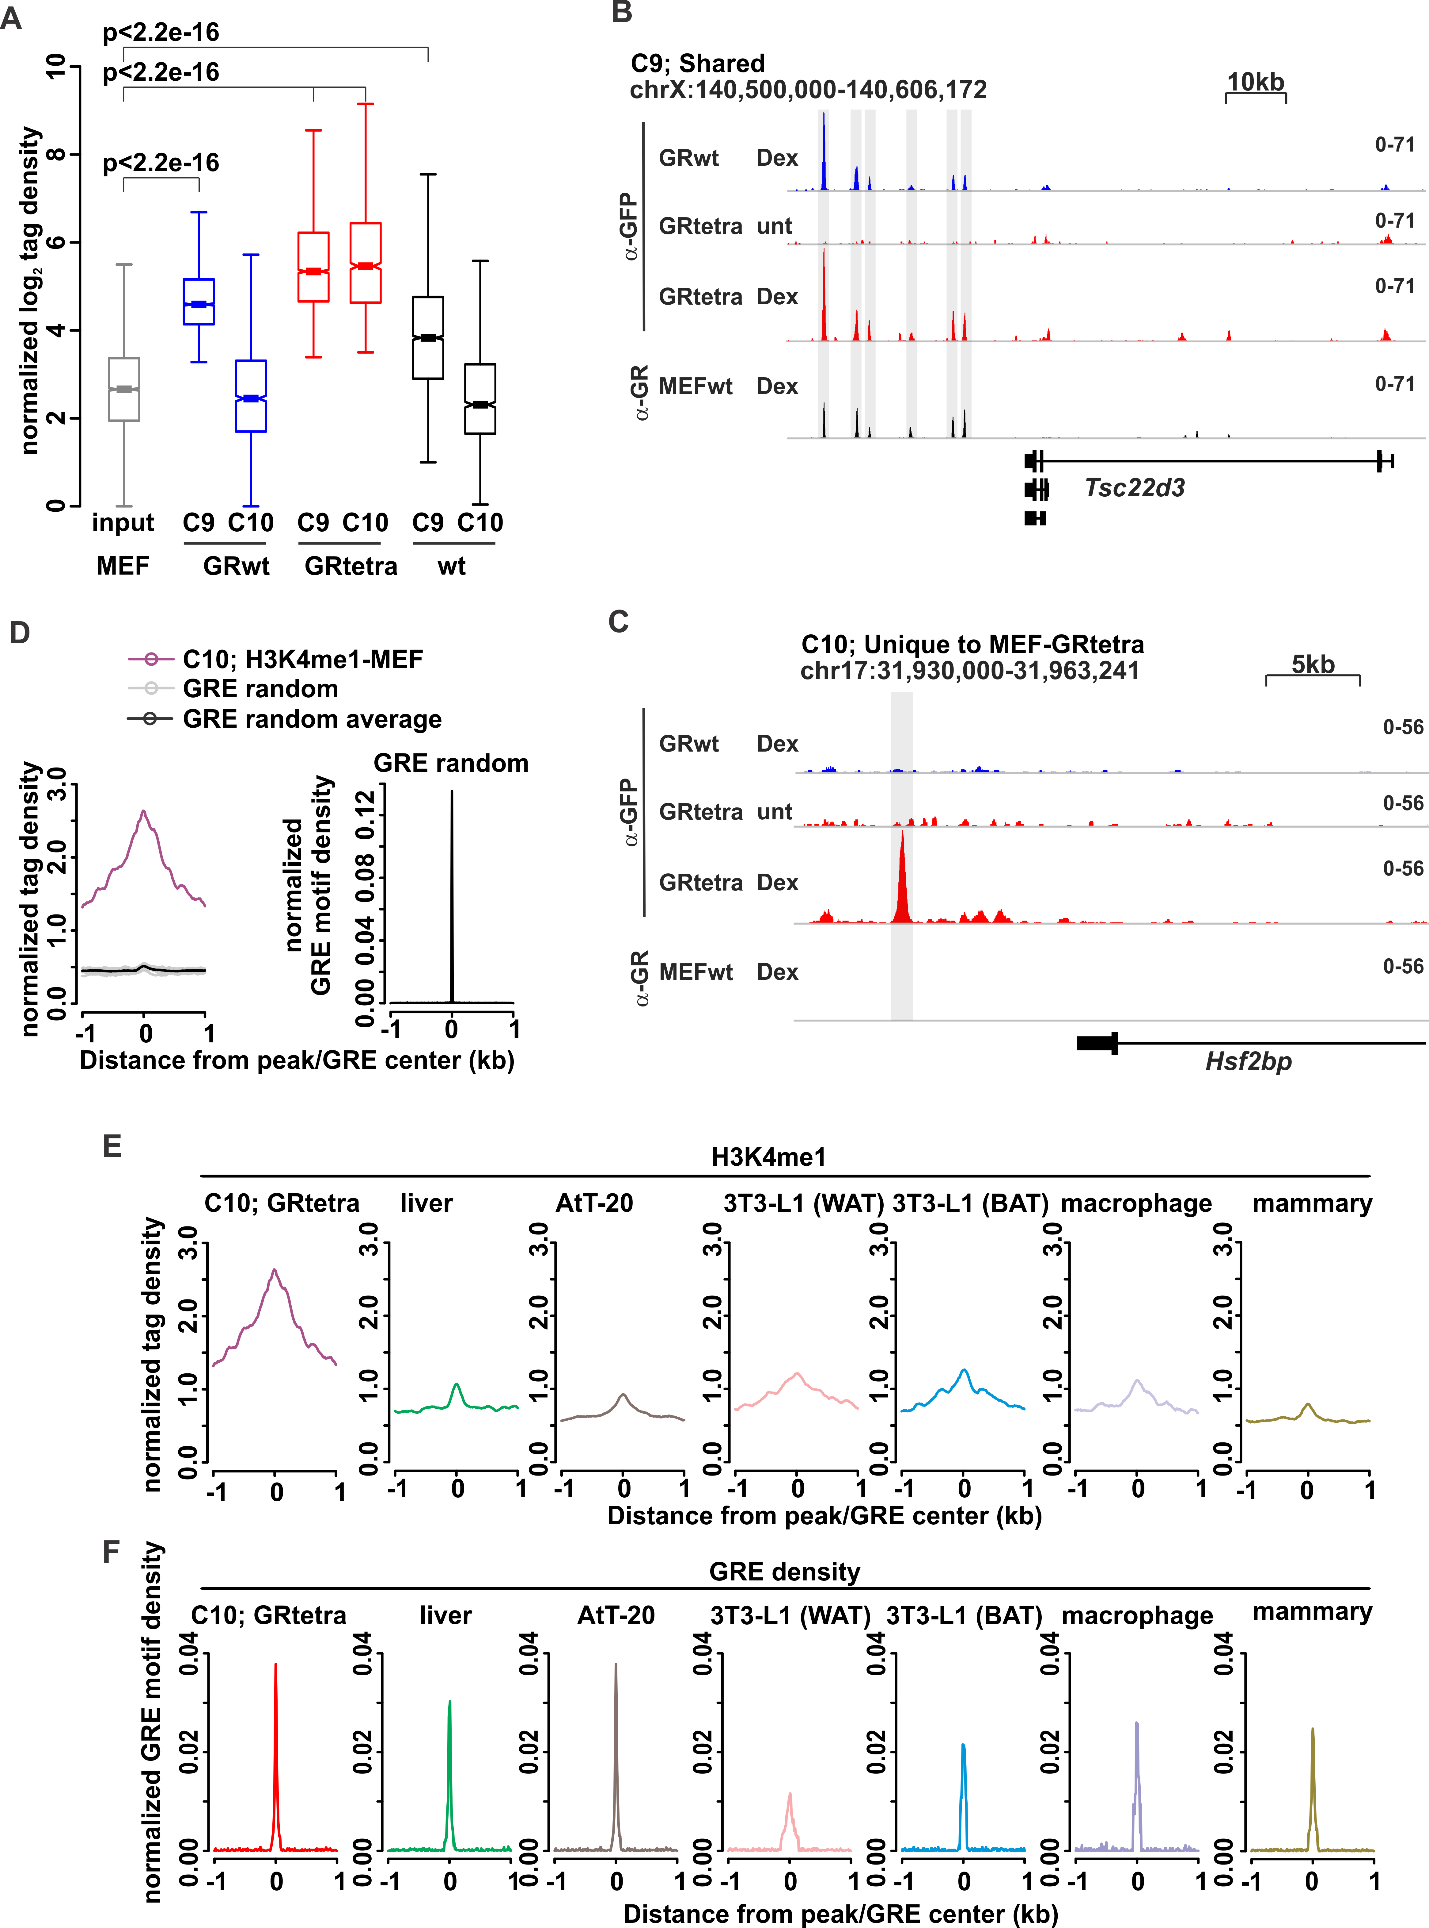


**Supplemental Figure S9**

**Supplemental Figure S9**. **Comparison of GRwt and GRtetra cistromes in MEFs**. (A) Statistical comparison of GR enrichment to C9-C10 sites. Box plots represent normalized log2 tag density of MEF input (grey), GRwt (blue), GRtetra (red), and endogenous GR in MEF cells (black) to C9-C10 sites. p-values were calculated using unpaired two-sample *t-*test. All box plots are normalized to total of 10 million reads. (B-C) Example genome browser tracks of C9 (B), and C10 (C) sites. All genome browser tracks are normalized to total of 10 million reads. (D) Aggregate plot (left) show comparison of H3K4me1 enrichment at C10 to random GREs. Aggregate plot (right) shows the enrichment of GRE at random GREs. (E) Comparison of H3K4me1 enrichment at C10 to GR binding sites in other cell lines as in Fig. 3C. (F) Aggregate plots showing the enrichment of GRE at C10 and GR binding sites present in other cell lines as in Supplemental Fig. 7C. All aggregate plots and genome browser tracks are normalized to total of 10 million reads, and aggregate plots further to local tag density.


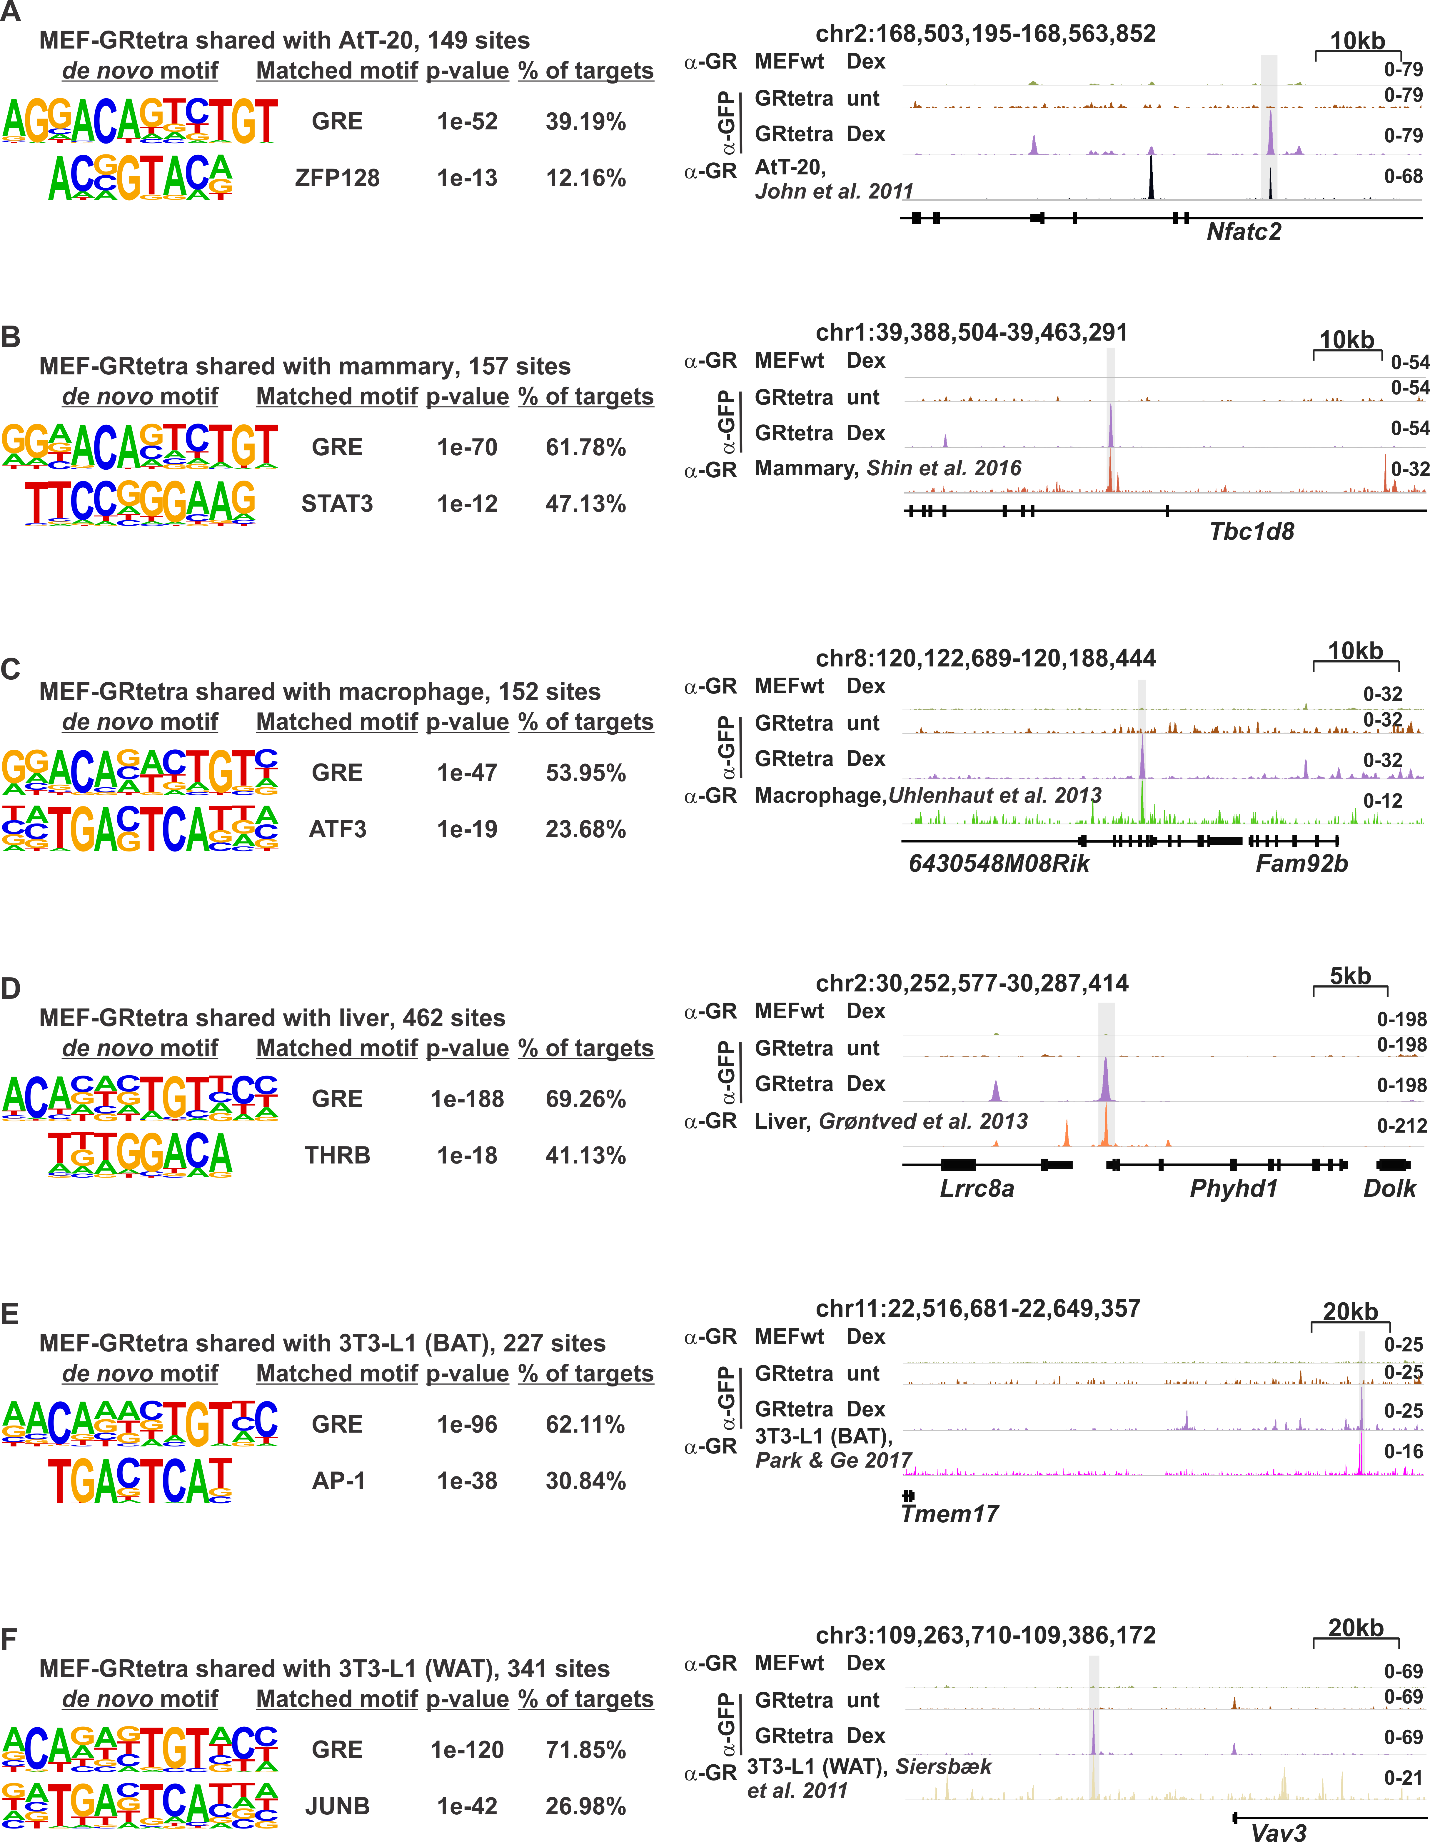


**Supplemental Figure S10**

**Supplemental Figure S10**. **Overlap of unique MEF-GRtetra sites to GR data in other cell lines.** (A-F) Overlap of C10 sites with GR ChIP-seq data in other cell types show varying overlap with (A) AtT-20, (B) mouse mammary tissue, (C) macrophage, (D) mouse liver, (E) 3T3-L1 differentiated towards brown adipose tissue (BAT), and (F) 3T3-L1 differentiated towards white adipose tissue (WAT). *De novo* motif enrichment and genome browser track examples of overlapping sites are shown for each GR ChIP-seq data set. All genome browser tracks are normalized to total of 10 million reads.

**SUPPLEMENTAL METHODS**

**Cell culture**

All cell lines were grown in Dulbecco’s modified Eagle’s medium (DMEM, Invitrogen) supplemented with 5 μg/ml tetracycline (Sigma-Aldrich #T7660), 10% fetal bovine serum (Gemini), sodium pyruvate, nonessential amino acids, and 2 mM glutamine maintained in a humidifier at 37C and 5% CO2. Cells were plated for experiments in DMEM growth medium supplemented with 10% charcoal/dextran-treated serum for 24hrs prior to hormone treatment. MEF cells (WT, GRKO and GPFGR mutants) have been previously described ([Presman et al. 2014](#_ENREF_18); [Presman et al. 2016](#_ENREF_17)). The remaining cell lines used in this study, all derive from C127 (RRID: CVCL_6550) cells. 3134 cells express endogenous GR, and 3617 cells are derived from 3134 cells containing stably integrated rat GFP-GR.

**Generation of cell lines by CRISPR/cas9**

We transfected 3617 ([McNally et al. 2000](#_ENREF_14)) with pX330 CRISPR/Cas9 plasmid (Addgene, #42230) containing either of two guide RNA sequences (5’-GGTGAAGGTGATGCAACATACGG-3’ and 5’-GTAGTGACAAGTGTTGGCCAAGG-3’) to induce random frameshift mutations at the stably integrated rat GFP-GR gene. We screened cells by FACS for negative GFP selection in the absence of tetracycline and confirmed via confocal microscopy (data not shown). We then used this monoclonal cell line with knocked out GFP-GR as the parental cell line for targeting the endogenous *Nr3c1* gene by CRISPR-Cas9 strategy ([Amelio and Melino 2014](#_ENREF_1)). We transfected the parental cell line with pX330 plasmid containing a guide RNA (5’-CATTTTCGATAGCGGCATGC-3’) to exon 3 of mouse *Nr3c1*, to avoid potential expression of translational isoforms of the receptor ([Lu and Cidlowski 2005](#_ENREF_13)). Single cell clones were screened by immunofluorescence for nuclear GR in the presence of Dexamethasone (Dex; Sigma-Aldrich #D1756) (antibody kindly provided by Michael J. Garabedian ([Torra et al. 2009](#_ENREF_24)); data not shown). The GRKO cell line, derived from a single-cell clone, was further validated for lack of GR via western blot (Supplemental Fig. S1B) and for a lack of hormone response by qPCR (data not shown). We reintroduced the GFP-tagged WT and the mouse GR P481R mutant into the GT(Rosa)26Sor locus. This mutation was generated by using a QuikChange II XL Site-Directed Mutagenesis Kit according to the manufacturer’s instructions (Stratagene). The mouse P481R is the orthologous mutation of the original rat P493R mutant ([van Tilborg et al. 2000](#_ENREF_27)). We co-transfected the pX330 plasmid with a guide RNA (5’-GACTGGAGTTGCAGATCACG-3’) to the Rosa locus as well as a donor plasmid containing either form of the GFP-GR driven by the CMV promoter. The cells were first selected for donor insertion by puromycin. We finally FACS sorted a polyclonal population of cells where GFP-GR levels and cell-shape uniformity were similar to the GFP-GR levels found in 3617 cells after 24 h of tetracycline withdraw (endogenous GR levels).

**Immunoblotting**

Whole cell extracts (no hormone treatment) for western blots were prepared in RIPA buffer (50mM Tris pH 8.0, 150mM NaCl, 1% Tergitol, 0.5% Na-Deoxycholate, 0.1% SDS) with protease inhibitor cocktail (Sigma-Aldrich #P2714) and quantitated by Bradford assay (Biorad #500-006). We ran 30 μg of cell extract on 4-20% PAGE gels (Biorad #4561096) and transferred onto PVDF membranes (Biorad #1704156). Blots were incubated in 5% milk with anti-GR (Santa Cruz #sc-1004) at 1:1000 dilution and GAPDH (Abcam #ab8245) at 1:2000 dilution. For secondary detection, the membranes were probed in 5% milk with HRP-conjugated secondary mouse or rabbit antibodies (#31430 and #31460, respectively; Pierce Thermo Scientific,) at 1:2500 dilution. The membranes were incubated with Super Signal Pico detection reagent (Pierce Thermo Scientific #34082 #34083) and visualized using ChemiDoc MP imaging system (Bio-Rad).

**GR subcellular localization by confocal imaging**

GRwt and GRtetra cells were seeded into 2-well Lab-Tek chamber slides (Thermo Fisher Scientific, Waltham, MA, USA) and incubated for at least 18 hrs in DMEM medium containing 10% charcoal-stripped FBS (Life Technologies) and 2 mM L-glutamine. Cells were treated with vehicle or 100 nM Dex for 1 h and imaged in a confocal microscope LSM 780 laser scanning microscope (Carl Zeiss, Inc., Thornwood, NY, USA) equipped with an environmental chamber and a 40X oil immersion objective (NA=1.4). The excitation source was a multi-line Ar laser tuned at 488 nm. Fluorescence was detected with a GaAsP detector in photon-counting mode using 490-561 nm filtering.

**ChIP**

GR mutant expressing cells were seeded at ~70% confluence onto 150-mm dish and allowed to grow in steroid-depleted medium for 24 h prior ChIP. Cells were left untreated or treated with 100 nM of Dex (Sigma-Aldrich) for 1 h. The cells were cross-linked by adding paraformaldehyde (Electron Microscopy Sciences #15710) to the medium to a final concentration of 1% (v/v) for 10 min and subsequently quenched with 150 mM glycine for 10 min. The cells were rinsed twice with ice-cold PBS and collected in ice-cold PBC containing Protease Inhibitor Cocktail (Sigma-Aldrich #P2714). After collection, the cell pellets were resuspended in ChIP Lysis Buffer [0.5% (w/v) sodium dodecyl sulfate (SDS), 8 mM EDTA, 40 mM Tris-HCl (pH 8), protease inhibitor cocktail]. Chromatin was sonicated (Bioruptor, Diagenode) to an average DNA length of 200–500 bp and cellular debris was removed by centrifugation. After determining the chromatin concentration, the sample was diluted with ChIP Dilution Buffer [0.01% (w/v) SDS, 1.2 mM EDTA, 16.7 mM Tris-HCl (pH 8), 1.1% (v/v) Triton X-100, 167 mM NaCl, protease inhibitor cocktail] to concentration of 200 μg per ml of chromatin. For immunoprecipitation, 600 μg of chromatin was incubated with antibody (see below for details) coupled onto Dynabeads magnetic beads (Thermo Fisher Scientific #11201D #11203D) with rotation overnight at 4C. The beads were harvested by magnets and washed once for 10 min in cold room by rotation with 1 ml of ChIP Low Salt Wash Buffer [0.01% (w/v) SDS, 2 mM EDTA, 20 mM Tris-HCl (pH 8), 1% (v/v) Triton X-100, 150 mM NaCl], 1 ml of ChIP High Salt Wash Buffer [0.01% (w/v) SDS, 2 mM EDTA, 20 mM Tris-HCl (pH 8), 1% (v/v) Triton X-100, 500 mM NaCl], and 1 ml of ChIP LiCl Wash Buffer [250 mM LiCl, 1% (w/v) IGEPAL, 1% (w/v) sodium deoxycholate, 10 mM Tris-HCl (pH 8), 1 mM EDTA]. Finally, the beads were washed two times for 2 min in cold room by rotation with 1 ml of TE buffer [1 mM EDTA, 10 mM Tris-HCl (pH 8)]. Antibody-bound chromatin fragments were eluted, the cross-linking was reversed and the remaining proteins were digested with ChIP Elution Buffer [0.5% (w/v) SDS, 200 mM NaCl, 10 mM EDTA, 50 mM Tris-HCl (pH 7.5), 25 μg proteinase K (Thermo Fisher Scientific)] by incubating at 50C for 2 h with shaking and subsequently overnight at 65C. DNA was extracted from the samples with phenol-chloroform extraction and ethanol precipitation. ChIP-seq libraries were generated Illumina TruSeq ChIP Sample Prep Kit (Illumina #IP-202-1012) according to manufacturer’s instructions.

**ChIP antibodies**

The following antibodies and concentration per immunoprecipitation were used in ChIP. Anti-GR cocktail (3 μg, Santa Cruz #sc-1004; 7.5 μg, Thermo Fisher Scientific #PA1-511A; 15 μg, Thermo Fisher Scientific #BuGR2 MA1-510), anti-GFP (25 μg, Abcam #ab290), anti-H3K27ac (4 μg, Active Motif #39133), anti-H3K4me1 (6 μg, Abcam #ab8895), anti-SMARCA4 (BRG1) (2 μl, Abcam #ab110641).

**Stability/detectability test for GFP-GRwt and GFP-GRtetra**

Cells were treated or not with Dex for 1h and then fixed as in ChIP. After lysis, we sonicated the samples for 10 cycles, spin them down and collected supernatant, then resuspended pellet in fresh lysis buffer and sonicated again 5 cycles, spin them down one more time, and merge supernatants. After Bradford quantification, we de-crosslinked in WB loading buffer (SDS/DTT) for 20 min at 95C and run the gels.

**RNA Isolation**

One million GR mutant expressing cells were seeded onto 100-mm dishes and allowed to grow in steroid-depleted medium for 24 hrs. Subsequently, the cells were left untreated or treated with 100 nM of Dex for 2 h prior RNA isolation. RNA isolations were performed using the Pure-link RNA kit (Thermo Fisher Scientific #12183018A) per the manufacturer’s instructions. RNA was treated on the column with DNase (Thermo Fisher Scientific #12185010) prior to elution and quantitation. RNA-seq libraries were generated from rRNA depleted (Illumina #RS-122-2301) total-RNA samples, using Illumina Stranded Total RNA (Illumina #20020596) according to manufacturer’s instructions.

**RNA-seq data analysis**

We sequenced at least two biological replicates of each cell line for the untreated condition and three replicates each for the hormone treatment condition using Illumina HiSeq 2500 with pair-end reads. RTA 2.4.11 was used for Basecalling and Bcl2fastq 2.17 was used for demultiplexing allowing 1 mismatch. Trimmomatic 0.36 ([Bolger et al. 2014](#_ENREF_3)) was used for adapter and quality control. RNA-seq alignment to mouse mm10 genome was performed by TopHat (2.0.8) ([Trapnell et al. 2009](#_ENREF_25)) with command tophat -G annotation.gtf -o ./ -r 10 --mate-std-dev 200 -p 16 --librarytype fr-firststrand bowtie2_annotation/prefix read1.fastq read2.fastq. All RNA-seq biological replicates correlated well with each other (Supplemental Table_S4). Subsequent downstream analysis was performed using HOMER ([Heinz et al. 2010](#_ENREF_7)) and DESeq2 ([Love et al. 2014](#_ENREF_12)). We utilized a stringent false discovery rate (FDR) cutoff and fold change (FC) requirement for genes to be considered Dex-regulated. Genes are Dex-regulated if FDR<0.001 and FC exhibit a 1.5 or greater fold induction/repression with hormone (>±1.5 Dex/NT). We included only genes that are annotated in the RefSeq database. No hormone-induced genes met these criteria in the GRKO cells and only one GR-repressed gene did (Btg2, NM_007570). This single gene is shared only in the GRwt cell line where the gene was up-regulated, not down-regulated.

Principal component analysis (Supplemental Fig. 4E-F) was performed using R package prcomp with default settings. Normalized RPKM values were used in the analysis and only the first two components were displayed.

**ATAC**

GR mutant expressing cells were seeded at ~70% confluence onto T160 flask and allowed to grow in steroid-depleted medium for 24 h prior ATAC. Cells were left untreated or treated with 100 nM of Dex for 1 h. The cells were detached from the flasks using 5 ml of Accutase (Thermo Fisher Scientific #A6964) by incubating 5 min at RT. Hormone exposed cells were detached with Accutase in the presence of 100 nM Dex. Accutase was inactivated with 7.5 ml of growth media. After collection, in order to isolate nuclei, the cell pellets were resuspended in a concentration of 6 million cells per ml in Buffer A [15 mM Tris-HCl (pH 8), 15 mM NaCl, 60 mM KCl, 1 mM EDTA, 0.5 mM EGTA, 0.5 mM Spermidine (Sigma-Aldrich #S2626), protease inhibitor cocktail]. Subsequently, equal volume of Buffer A with 0.04% (w/v) IGEPAL (Sigma-Aldrich #I8896) was added, to obtain a concentration of 3 million cells per ml with 0.02% (w/v) IGEPAL. Samples were incubated on ice for 10 min and washed two times with Buffer A without IGEPAL. Isolation of nuclei was verified by Trypan Blue (Thermo Fisher Scientific #15250061) counting. Subsequently, the rest of ATAC followed published protocol ([Buenrostro et al. 2015](#_ENREF_4)). Briefly, 100 000 nuclei were subjected to Tn5 transposition reaction using 2.5 μl TDE1 from Nextera DNA Library Prep Kit (Illumina #FC-121-1030). After adding the transposition reaction mix, the samples were incubated 30 min at 37C, and subsequently DNA was purified using MinElute PCR Purification kit (Qiagen #28004). Transposed DNA was PCR amplified using 1.25 μM of Ad1 and 1.25 μM of barcoded Ad2.x (see list below) primers, and NEBNext High-Fidelity 2X PCR Master Mix (New England Biolabs #M0551S). After 5x PCR amplification cycles, appropriate number of additional PCR cycles was determined to retain library complexity. 5 μl aliquot was PCR amplified 20x additional cycles using 0.125 μM of the same primer pair and iQ SYBR Green mix (Bio-Rad #1708882). Additional number of PCR cycles corresponds to one third of the maximum fluorescent intensity in qPCR. After additional PCR cycles, size selection was performed using SPRIselect (Beckman Coulter #B23317) to remove less than 150 bp and more than 800 bp fragments according to manufacturer’s instructions. Size selection was verified using 5% TBE PAGE gels (Bio-Rad #3450049).

**ATAC index primers**

The following index primers were used in ATAC with barcode underlined.

Ad1: AATGATACGGCGACCACCGAGATCTACACTCGTCGGCAGCGTCAGATGTG

Ad2.1: CAAGCAGAAGACGGCATACGAGATTCGCCTTAGTCTCGTGGGCTCGGAGATGT

Ad2.2: CAAGCAGAAGACGGCATACGAGATCTAGTACGGTCTCGTGGGCTCGGAGATGT

Ad2.3: CAAGCAGAAGACGGCATACGAGATTTCTGCCTGTCTCGTGGGCTCGGAGATGT

Ad2.4: CAAGCAGAAGACGGCATACGAGATGCTCAGGAGTCTCGTGGGCTCGGAGATGT

Ad2.5: CAAGCAGAAGACGGCATACGAGATAGGAGTCCGTCTCGTGGGCTCGGAGATGT

Ad2.6: CAAGCAGAAGACGGCATACGAGATCATGCCTAGTCTCGTGGGCTCGGAGATGT

Ad2.7: CAAGCAGAAGACGGCATACGAGATGTAGAGAGGTCTCGTGGGCTCGGAGATGT

Ad2.8: CAAGCAGAAGACGGCATACGAGATCCTCTCTGGTCTCGTGGGCTCGGAGATGT

**ChIP- and ATAC-seq data analysis**

Biological duplicate ChIP samples were sequences using Illumina NextSeq 500 with single-end reads, while biological duplicate ATAC samples were sequenced using Illumina HiSeq 4000 with pair-end reads. RTA 2.4.11 was used for Basecalling and Bcl2fastq 2.17 was used for demultiplexing allowing 1 mismatch. Trimmomatic 0.36 ([Bolger et al. 2014](#_ENREF_3)) was used for adapter and quality control. Subsequently the data were aligned to the mouse reference mm10 genome using Bowtie 2 ([Langmead and Salzberg 2012](#_ENREF_10)) with command Bowtie2 –p 8 –x bowtie2_ref/genome_prefix –U read1.fastq –S result.sam. All ChIP-seq and ATAC-seq biological replicates correlated well with each other (Supplemental_Table_S4). Subsequent downstream analysis was performed using HOMER ([Heinz et al. 2010](#_ENREF_7)). Peaks in each dataset were called using findPeaks with style factor for TFs and style histone for histone modifications. GR ChIP from the GRKO cell line was used as control for GR samples while input sample from the GRKO cell lines was used for the other samples. Peak filtering was done with the following parameters; FDR<0.001, >4 FC over control, >4 FC over local background, and >75 tags per site. In addition, untreated GR ChIP sample was used to further filter out noise from GR samples using default parameters on getDifferentialPeaks. DESeq2 ([Love et al. 2014](#_ENREF_12)) through getDiffrentialPeaksReplicates.pl was used to isolate differential binding peaks (FDR<0.05, FC>3) between the GR mutants. The same differential binding peaks were also identified with getDifferentialPeaks.pl (Poisson p-value <0.0001, FC>4).

Log2 transformed tag counts were used in scatter plots. Correlation between two samples was determined with Pearson correlation coefficient (PCC). Aggregate plots and heatmaps were generated with 10 bp or 20 bp bins surrounding ±1 kb area around the center of the peak or TSS. All plots were normalized to 10 million mapped reads and further to local tag density, tags per bp per site. Statistical significance in the box plot comparisons was determined with unpaired two-sample *t-*test. AnnotatePeaks.pl was used to calculate the enrichment of sites to different genomic location; promoter, intron, intergenic and miscellaneous (other) sites. Miscellaneous sites consist of UTRs, exons and non-coding RNAs. *De novo* motif searches were performed with findMotifsGenome.pl using default parameters (Supplemental Table S2). Association of GR binding sites to Dex-regulated genes (peak-centric analysis) was performed based on linear distance using AnnotatePeaks.pl. C4-C6 cluster sites where checked against the union of Dex up-regulated or Dex down-regulated genes in GRtetra and GRwt cells. Up-regulated genes tended to be closer to regulated promoters while many down-regulated genes lack nearby GR binding sites, as has been previously reported ([Reddy et al. 2009](#_ENREF_19)). Of the 367 Dex up-regulated genes, GR binding association was detected for ~67.0%, ~38.4%, or ~18.3% of genes with C4, C5, or C6 sites, respectively. Of the 120 Dex down-regulated genes, GR binding association was detected for ~40.8%, ~20.0%, or ~6.7% of genes with C4, C5, or C6 sites, respectively. GR binding sites determined to be associated with up-regulated genes, down-regulated genes, and ambiguously regulated genes in the peak-centric analysis were used in the H3K27ac aggregated plots. GR binding sites that were non-associated were included in the ambiguously associated cluster. AnnotatePeaks.pl was used to determine the closest GR binding site for each Dex-regulated gene (gene-centric analysis). Median distance between associated GR binding sites and regulated promoter was 30kb and 158kb (C4), 91kb and 248kb (C5), 269kb and 766kb (C6) for up-regulated and down-regulated genes, respectively. Determining the closest GR binding site and its cluster to shared or GRtetra uniquely regulated promoter was done with AnnotatePeaks.pl. Statistical significance in the association comparisons was done with *Χ2-*test.

For the comparison of our GR binding to published data (Fig. 3 and Fig. 4), we called peaks from each dataset utilizing either available non-treated sample or input samples from the same dataset or from the same laboratory (see Supplemental Table S3 for details). Peak calling was performed with HOMER as indicated above. If the dataset was sequenced with low sequence depth, no tags per site criteria was used. Subsequently, isolation of differential GR binding sites between our GR and published GR data was done as above through getDifferentialPeaks. For cell types with multiple datasets (liver and macrophage), cell type specific sites were required to present in one dataset. Cell type specific GR binding sites compared to GRtetra were determined as 13552 for liver, 2941 for macrophage, 9261 for 3T3-L1 differentiated towards WAT, 4200 for 3T3-L1 differentiated towards BAT, 7710 for AtT-20 (pituitary), 2010 for MEFs, and 10904 for mammary tissue. From the overlapping GR sites between GRtetra and different cell type GR data, the number of C6 sites (1808 sites) that overlapped at least with one dataset was determined. For cell types with multiple datasets (liver and macrophage), overlapping site was required to present in one dataset. The overlap of C6 sites were determined as 584 for liver, 576 for macrophage, 450 for 3T3-L1 differentiated towards WAT, 239 for 3T3-L1 differentiated towards BAT, 292 for AtT-20 (pituitary), 181 for MEFs, and 279 for mammary tissue. For MEF-GRtetra data, the overlap of C10 sites (1517 sites) were determined as 462 for liver, 152 for macrophage, 341 for 3T3-L1 differentiated towards WAT, 227 for 3T3-L1 differentiated towards BAT, 149 for AtT-20 (pituitary), and 157 for mammary tissue. The total overlap of GRtetra binding sites (C4-C6) with published GR data were determined as 3779 for liver, 2070 for macrophage, 2877 for 3T3-L1 differentiated towards WAT, 2896 for 3T3-L1 differentiated towards BAT, 1543 for AtT-20 (pituitary), 3095 for MEFs, and 2065 for mammary tissue. In the H3K4me1 comparisons, genomic coordinates of GR motif occurrences were used to further isolate differential GR binding sites with GRE. For the generation of random GRE dataset, 1000 random GRE were selected from list of GRE occurrences generated using scanMotifGenomeWide.pl. This was repeated ten times, and the average enrichment profile was obtained from the ten repeats.

**Published data**

The following published data were utilized from GEO or NCBI Sequence Read Archive (SRA) (https://www.ncbi.nlm.nih.gov/sra) databases; ChIP-seq of GR±Dex (SRP004871) ([John et al. 2011](#_ENREF_8)), JUN±Dex (SRP007111) ([Biddie et al. 2011](#_ENREF_2)), SMARCA4±Dex (GSE53585, GSE94562) ([Morris et al. 2014](#_ENREF_15); [Johnson et al. 2018](#_ENREF_9)), and EP300±Dex (GSE61236) ([Stavreva et al. 2015](#_ENREF_23)) from the 3134 cell line; DNase-seq±Dex (SRP004871) ([John et al. 2011](#_ENREF_8)) and MNase-seq±Dex (GSE92505) ([Johnson et al. 2018](#_ENREF_9)) from the 3134 cell line; ChIP-seq of GRwt from mouse liver (GSE59752) ([Lim et al. 2015](#_ENREF_11)), ChIP-seq of GR±Dex, DNase-seq±Dex (GSE46047) ([Grontved et al. 2013](#_ENREF_6)) from adrenalectomized mouse liver; GR ChIP-seq from AtT-20 (SRP004871) ([John et al. 2011](#_ENREF_8)), MEF (GSE69947)([Sasse et al. 2015](#_ENREF_20)), 3T3-L1 [BAT (GSE76619)]([Park and Ge 2017](#_ENREF_16)), 3T3-L1 [WAT (GSE27826)] ([Siersbaek et al. 2011](#_ENREF_22)) cell lines, mouse primary macrophages (GSE31796) ([Uhlenhaut et al. 2012](#_ENREF_26)) and (GSE59764) ([Lim et al. 2015](#_ENREF_11)), and mouse mammary tissue (GSE74826) ([Shin et al. 2016](#_ENREF_21)); ATAC-seq and H3K4me1 ChIP-seq from MEFs (GSE90895) ([Chronis et al. 2017](#_ENREF_5)). Further details e.g. on the used control samples, can be found in Supplemental Table S3.

**Supplemental References**

Amelio I, Melino G. 2014. CRISPR: a new method for genetic engineering - A prokaryotic immune component may potentially open a new era of gene silencing. *Cell DeathDiffer*.

Biddie SC, John S, Sabo PJ, Thurman RE, Johnson TA, Schiltz RL, Miranda TB, Sung MH, Trump S, Lightman SL et al. 2011. Transcription factor AP1 potentiates chromatin accessibility and glucocorticoid receptor binding. *MolCell* **43**(1): 145-155.

Bolger AM, Lohse M, Usadel B. 2014. Trimmomatic: a flexible trimmer for Illumina sequence data. *Bioinformatics* **30**(15): 2114-2120.

Buenrostro JD, Wu B, Chang HY, Greenleaf WJ. 2015. ATAC-seq: A Method for Assaying Chromatin Accessibility Genome-Wide. *CurrProtocMolBiol* **109**: 21-29.

Chronis C, Fiziev P, Papp B, Butz S, Bonora G, Sabri S, Ernst J, Plath K. 2017. Cooperative Binding of Transcription Factors Orchestrates Reprogramming. *Cell* **168**(3): 442-459 e420.

Grontved L, John S, Baek S, Liu Y, Buckley JR, Vinson C, Aguilera G, Hager GL. 2013. C/EBP maintains chromatin accessibility in liver and facilitates glucocorticoid receptor recruitment to steroid response elements. *EMBO J* **32**(11): 1568-1583.

Heinz S, Benner C, Spann N, Bertolino E, Lin YC, Laslo P, Cheng JX, Murre C, Singh H, Glass CK. 2010. Simple combinations of lineage-determining transcription factors prime cis-regulatory elements required for macrophage and B cell identities. *MolCell* **38**(4): 576-589.

John S, Sabo PJ, Thurman RE, Sung MH, Biddie SC, Johnson TA, Hager GL, Stamatoyannopoulos JA. 2011. Chromatin accessibility pre-determines glucocorticoid receptor binding patterns. *NatGenet* **43**(3): 264-268.

Johnson TA, Chereji RV, Stavreva DA, Morris SA, Hager GL, Clark DJ. 2018. Conventional and pioneer modes of glucocorticoid receptor interaction with enhancer chromatin in vivo. *Nucleic Acids Res* **46**: 203-214.

Langmead B, Salzberg SL. 2012. Fast gapped-read alignment with Bowtie 2. *Nat Methods* **9**(4): 357-359.

Lim HW, Uhlenhaut NH, Rauch A, Weiner J, Hubner S, Hubner N, Won KJ, Lazar MA, Tuckermann J, Steger DJ. 2015. Genomic redistribution of GR monomers and dimers mediates transcriptional response to exogenous glucocorticoid in vivo. *Genome Res* **25**(6): 836-844.

Love MI, Huber W, Anders S. 2014. Moderated estimation of fold change and dispersion for RNA-seq data with DESeq2. *Genome Biol* **15**(12): 550.

Lu NZ, Cidlowski JA. 2005. Translational regulatory mechanisms generate N-terminal glucocorticoid receptor isoforms with unique transcriptional target genes. *MolCell* **18**(3): 331-342.

McNally JG, Mueller WG, Walker D, Wolford RG, Hager GL. 2000. The glucocorticoid receptor: Rapid exchange with regulatory sites in living cells. *Science* **287**(5456): 1262-1265.

Morris SA, Baek S, Sung MH, John S, Wiench M, Johnson TA, Schiltz RL, Hager GL. 2014. Overlapping chromatin remodeling systems collaborate genome-wide at dynamic chromatin transitions. *NatStructMolBiol* **21**(1): 73-81.

Park YK, Ge K. 2017. Glucocorticoid Receptor Accelerates, but Is Dispensable for, Adipogenesis. *Mol Cell Biol* **37**(2).

Presman DM, Ganguly S, Schiltz RL, Johnson TA, Karpova TS, Hager GL. 2016. DNA binding triggers tetramerization of the glucocorticoid receptor in live cells. *Proc Natl Acad Sci U S A* **113**(29): 8236-8241.

Presman DM, Ogara MF, Stortz M, Alvarez LD, Pooley JR, Schiltz RL, Grontved L, Johnson TA, Mittelstadt PR, Ashwell JD et al. 2014. Live cell imaging unveils multiple domain requirements for in vivo dimerization of the Glucocorticoid Receptor. *PLoS Biol* **12**(3): e1001813.

Reddy TE, Pauli F, Sprouse RO, Neff NF, Newberry KM, Garabedian MJ, Myers RM. 2009. Genomic determination of the glucocorticoid response reveals unexpected mechanisms of gene regulation. *Genome Res* **19**(12): 2163-2171.

Sasse SK, Zuo Z, Kadiyala V, Zhang L, Pufall MA, Jain MK, Phang TL, Stormo GD, Gerber AN. 2015. Response Element Composition Governs Correlations between Binding Site Affinity and Transcription in Glucocorticoid Receptor Feed-forward Loops. *J Biol Chem* **290**(32): 19756-19769.

Shin HY, Willi M, Yoo KH, Zeng X, Wang C, Metser G, Hennighausen L. 2016. Hierarchy within the mammary STAT5-driven Wap super-enhancer. *Nat Genet* **48**(8): 904-911.

Siersbaek R, Nielsen R, John S, Sung MH, Baek S, Loft A, Hager GL, Mandrup S. 2011. Extensive chromatin remodelling and establishment of transcription factor 'hotspots' during early adipogenesis. *EMBO J* **30**(8): 1459-1472.

Stavreva DA, Coulon A, Sung MH, Baek S, John S, Stixova L, Tesikova M, Hakim O, Miranda TB, Hawkins M et al. 2015. Dynamics of chromatin accessibility and long-range interactions in response to glucocorticoid pulsing. *Genome Res* **25**(6): 845-857.

Torra IP, Staverosky JA, Ha S, Logan SK, Garabedian MJ. 2009. Development of phosphorylation site-specific antibodies to nuclear receptors. *Methods Mol Biol* **505**: 221-235.

Trapnell C, Pachter L, Salzberg SL. 2009. TopHat: discovering splice junctions with RNA-Seq. *Bioinformatics* **25**(9): 1105-1111.

Uhlenhaut NH, Barish GD, Yu RT, Downes M, Karunasiri M, Liddle C, Schwalie P, Hubner N, Evans RM. 2012. Insights into Negative Regulation by the Glucocorticoid Receptor from Genome-wide Profiling of Inflammatory Cistromes. *MolCell* **49**(1): 158-171.

van Tilborg MA, Lefstin JA, Kruiskamp M, Teuben J, Boelens R, Yamamoto KR, Kaptein R. 2000. Mutations in the glucocorticoid receptor DNA-binding domain mimic an allosteric effect of DNA. *J Mol Biol* **301**(4): 947-958.
