# Supplementary material for: Glucocorticoid receptor quaternary structure drives chromatin occupancy and transcriptional outcome
Source: HighWire-hosted journal article supplement (doi:10.1101/gr.244814.118), 2019-07-23
Supplement: Supplemental_Table_S1.xlsx [file Supplemental_Table_S1.xlsx]

## Sheet: Legend
Supplemental Table S1. RNA-seq differential expression data
RNA-seq differential expression data (-/+ Dex 2h) as determined by DEseq via Homer for each cell line [Parental (endogenous GR), GRKO, GRwt and GRtetra cell lines]. Each row represents a unique Refseq annotated gene from the mm10 mouse genome.

## Sheet: RNA-seq_parental
Transcript/RepeatID	chr	start	end	strand	Length	Copies	Annotation/Divergence	Parental_NT-rep1 (48657556.0 total)	Parental_NT-rep2 (40462216.5 total)	Parental_Dex-rep1 (44590498.0 total)	Parental_Dex-rep2 (60957902.5 total)	Parental_Dex-rep3 (65533125.0 total)	NT vs. Dex Log2 Fold Change	NT vs. Dex p-value	NT vs. Dex adj. p-value
NM_001301269	chr2	118745758	118748810	+	3050	1	Inafm2|5430417L22Rik|ENSMUSG00000074918|-|2|2 E5|protein-coding	11.6887	11.6535	11.7377	11.6946	11.7155	0.0604999	0.195025	0.661729
NM_146200	chr7	126546911	126566366	-	2859	1	Eif3c|110kDa|3230401O13Rik|Eif3s8|NIPIL(A3)|NipilA3|Xs|Xsl|-|7 69.14 cM|7 F3|protein-coding	14.3245	14.3409	14.3705	14.3633	14.3427	0.0301619	0.316503	0.789662
NM_197982	chr8	83715177	83723351	+	1646	1	Ddx39|2610307C23Rik|BAT1|DDXL|Ddx39a|URH49|-|8|8 C2|protein-coding	12.5641	12.6211	12.5878	12.583	12.5709	-0.0166865	0.673042	0.950515
NM_144524	chr12	86700502	86726460	-	3838	1	Angel1|1110030H02Rik|mKIAA0759|-|12|12 D2|protein-coding	8.1194	8.08059	8.09102	8.10873	8.09775	-0.00112397	0.993204	0.998293
NR_130323	chr2	10468343	10468463	+	120	1	Mir669d|Mirn669d|mmu-mir-669d|-|2 A1|2 8.22 cM|ncRNA	-0.226023	-0.22677	-0.226987	-0.22758	-0.22953	-1.22952	0.577291	1
NR_105958	chr19	8742971	8743079	+	108	1	Mir6992|Gm27906|mmu-mir-6992|-|19|19 A|ncRNA	1.91997	1.91154	1.91308	1.90878	1.90814	-0.983314	0.355943	1
NM_080560	chr10	95515162	95545658	+	3845	1	Ube2n|1500026J17Rik|AL022654|BB101821|UBC13|-|10|10 C2|protein-coding	12.3012	12.2511	12.2894	12.24	12.3037	0.00295105	0.947194	0.991224
NM_024412	chr4	141384611	141398706	-	2387	1	Clcnka|C75963|CLC-K1|Clcnk1|-|4|4 D3|protein-coding	-0.00201523	-0.00519618	-0.000761024	-0.00362445	-0.00381493	0.712482	0.748444	1
NM_001195074	chr3	32472321	32491969	-	715	1	Kcnmb3|EG435726|Gm5707|-|3|3 A3|protein-coding	2.00902	1.99268	2.00367	1.99473	1.99408	-0.558033	0.621663	0.942039
NR_040273	chr6	127149626	127212419	+	1316	1	9330179D12Rik|-|-|6|6 F3|ncRNA	1.67975	1.68267	1.68184	1.67958	1.67544	-0.474403	0.684163	1
NM_025302	chr17	46646229	46650132	+	1022	1	Mrpl2|CGI-22|L2mt|MRP-L14|MRP-L2|Rpml14|-|17|17 C|protein-coding	10.4838	10.4724	10.5824	10.5492	10.557	0.135838	0.0276617	0.19306
NM_026731	chr7	29289320	29293390	+	525	1	Ppp1r14a|1110001M11Rik|Cpi17|-|7|7 B1|protein-coding	0.470007	0.463787	0.465949	0.467116	0.466773	-0.127109	0.944527	1
NM_001289450	chr3	65188103	65378225	+	2834	1	Kcnab1|Akr8a8|Kvbeta1.1|mKv(beta)1|-|3 E1|3 30.15 cM|protein-coding	5.98564	5.97635	5.98679	5.97089	5.95528	-0.119845	0.65947	0.947523
NM_001163452	chr2	155634277	155692384	-	3177	1	Trpc4ap|4833429F06Rik|D2Ertd113e|Trrp4ap|mFLJ00177|truss|-|2 H1|2 77.26 cM|protein-coding	12.2476	12.2659	12.2974	12.2974	12.279	0.0431651	0.277601	0.758336
NM_011614	chr11	69686240	69696098	-	1685	1	Tnfsf12|Apo3l|Dr3l|Dr3lg|Tweak|-|11|11 B3|protein-coding	1.69993	1.70095	1.7026	1.70611	1.70518	1.03256	0.417517	1
NM_146214	chr8	109990436	109999804	+	2363	1	Tat|-|-|8 D3|8 57.38 cM|protein-coding	-1.32544	-1.32568	-1.32576	-1.3245	-1.32462	1.03725	0.781125	1
NR_039576	chrX	56587852	56587914	-	62	1	Mir5116|mmu-mir-5116|mu-mir-5116|-|X A6|X 30.06 cM|ncRNA	5.04321	5.04175	5.05894	5.04387	5.05636	0.238414	0.526465	0.912842
NM_028152	chr19	41943707	41981136	-	3932	1	Mms19|2410001K24Rik|2610042O15Rik|AI316855|C79368|C86341|Mms19l|-|19|19 C3|protein-coding	11.4538	11.4318	11.4093	11.4498	11.4137	-0.0245389	0.617598	0.941609
NM_001286013	chr17	46297928	46303271	+	1520	1	Dlk2|AI413481|DLK-2|Egfl9|-|17|17 C|protein-coding	9.36596	9.35299	9.90555	9.89387	9.94358	1.15212	7.93474e-42	8.01988e-40
NM_177914	chrX	6873484	6948363	+	6798	1	Dgkk|Gm360|-|X|X A1.1|protein-coding	-1.86719	-1.86617	-1.86745	-1.86762	-1.86768	-2.07879	0.647706	1
NR_040694	chr5	118952339	118961261	+	1285	1	4930413E15Rik|-|-|5|5 F|ncRNA	0	0	0	0	0	NA	1	1
NM_001042743	chr4	116306760	116464181	-	5692	1	Mast2|MAST205|Mtssk|-|4|4 D1|protein-coding	12.4781	12.3986	12.4366	12.4745	12.4413	0.01654	0.705679	0.958688
NM_001272041	chr8	123891758	123894775	-	1561	1	Acta1|AA959943|Acta-2|Acts|Actsk-1|-|8 E2|8 72.26 cM|protein-coding	4.97074	4.96771	4.97188	4.95599	4.9431	-0.277515	0.473145	0.883208
NM_025890	chr9	73102398	73104443	+	1681	1	Khdc3|2410004A20Rik|AI467128|FILIA|OEEP48|-|9|9 D|protein-coding	0	0	0	0	0	NA	1	1
NR_045355	chr19	15985075	16010912	+	1154	1	C130060C02Rik|-|-|19|19 A|ncRNA	0.349062	0.345891	0.347997	0.349147	0.350493	1.18921	0.565969	1
NM_133930	chr6	113483569	113493338	+	2022	1	Creld1|AI843811|-|6 E3|6 52.77 cM|protein-coding	9.60505	9.60192	9.99796	10.0467	10.0289	0.818135	2.14432e-25	1.50723e-23
NM_001166649	chrX	48541626	48594452	-	4022	1	Zfp280c|BC028839|Suhw3|Zfp633|Znf280c|mKIAA1584|-|X|X A5|protein-coding	10.6253	10.6532	10.6389	10.6511	10.6482	0.00981977	0.867978	0.982784
NR_046281	chr11	84829178	84830868	+	752	1	4930502E09Rik|-|-|11|11 C|ncRNA	3.83935	3.82453	3.82629	3.83093	3.81918	-0.309816	0.584392	0.933456
NM_001085529	chr4	150148972	150168482	+	1565	1	Slc2a7|OTTMUSG00000010396|-|4 E2|4|protein-coding	0	0	0	0	0	NA	1	1
NM_153089	chr2	158666733	158766334	+	6357	1	Ppp1r16b|ANKRD4|C130078N17Rik|TIMAP|Wdt4|-|2|2 H1|protein-coding	5.66731	5.65928	5.65751	5.63043	5.6404	-0.296475	0.324336	0.79941
NM_025450	chr5	129715528	129718691	+	1190	1	Mrps17|1810006P02Rik|Mprs17|-|5|5 G1.3|protein-coding	11.1146	11.1672	11.1954	11.2232	11.163	0.0741902	0.178389	0.63683
NM_001127576	chr11	102665585	102682238	+	4567	1	Meioc|Gm1564|Gm663|-|11|11 E1|protein-coding	3.03149	3.0264	3.02272	3.03887	3.02641	0.039025	0.959647	0.992083
NM_178627	chr15	83125978	83149336	-	3238	1	Poldip3|1110008P04Rik|AA408269|AL022852|C77954|PDIP46|SKAR|mKIAA1649|-|15|15 E1|protein-coding	12.5511	12.5593	12.638	12.6519	12.6549	0.115715	0.00176837	0.0204908
NM_024480	chr11	58330707	58347728	+	3014	1	Sh3bp5l|2310074E09Rik|BC003251|mKIAA1720|-|11|11 B1.3|protein-coding	10.2794	10.335	10.2968	10.2593	10.345	-0.0123233	0.862996	0.981915
NM_023504	chr2	147083876	147085345	-	1062	1	Nkx2-4|1700001P03Rik|Nkx-2.4|tinman|-|2|2 G2|protein-coding	0.469436	0.468565	0.470553	0.469467	0.467415	0.0692952	0.96879	1
NM_007562	chr7	81966662	81992299	-	4656	1	Bnc1|AI047752|AW546376|Bnc|-|7|7 D3|protein-coding	8.35905	8.41809	8.34895	8.33172	8.26464	-0.23769	0.0686152	0.365992
NM_001346804	chr1	179960760	180165603	+	8909	1	Cdc42bpa|A930014J19Rik|DMPK-like|-|1|1 H4|protein-coding	13.1625	13.1367	13.1921	13.2341	13.1508	0.0522611	0.194861	0.661346
NR_033553	chr9	121937275	121947016	+	1843	1	1700048O20Rik|1700022O21Rik|-|9|9 F4|ncRNA	1.19655	1.19975	1.19443	1.19127	1.19273	-1.49451	0.26833	1
NM_001163634	chr15	85535437	85578070	-	3488	1	Wnt7b|Wnt-7b|-|15 E2|15 40.39 cM|protein-coding	6.303	6.32025	6.28899	6.28991	6.2869	-0.225016	0.343092	0.809992
NM_146975	chr2	90295936	90296859	-	922	1	Olfr1273-ps|MOR227-4|Olfr1273|-|2|2 E1|protein-coding	0	0	0	0	0	NA	1	1
NM_001111142	chr17	46254165	46257316	+	1376	1	Lrrc73|Gm88|-|17|17 C|protein-coding	5.9293	5.92348	5.93986	5.9443	5.99148	0.41965	0.156278	0.59499
NM_009925	chr10	34389981	34397085	+	3125	1	Col10a1|Col10|Col10a-1|-|10 B1|10 18.85 cM|protein-coding	4.75065	4.74741	4.72876	4.72958	4.74086	-0.41124	0.310108	0.785534
NM_025945	chr14	70438748	70443471	-	2038	1	Polr3d|2810426M17Rik|44kDa|AI326118|AW489084|BN51T|RPC4|TSBN51|-|14|14 D2|protein-coding	10.2175	10.2071	10.1874	10.2164	10.1833	-0.0278009	0.679996	0.951583
NM_010472	chr1	82839460	82901001	+	7871	1	Agfg1|AU045498|C130049H11Rik|C85612|D730048C23Rik|Hrb|RAB|Rip|-|1|1 C5|protein-coding	13.027	13.0728	13.0293	13.0278	12.9888	-0.0430219	0.255259	0.734076
NM_148673	chr11	43433731	43447981	+	3713	1	Slu7|AU018913|D11Ertd730e|D3Bwg0878e|-|11|11 B1.1|protein-coding	11.0787	11.0517	11.1396	11.0704	11.1121	0.0615093	0.269037	0.750672
NR_132734	chr4	88909854	88942042	-	1207	1	LOC106557447|-|-|4 C4|ncRNA	9.97121	9.83105	9.26542	9.28149	9.33127	-1.19166	9.35013e-35	8.19439e-33
NM_001136556	chr2	156019140	156052947	-	6059	1	Fer1l4|9130402C12Rik|-|2|2 H1|protein-coding	2.22609	2.21228	2.20938	2.21908	2.21961	-0.453443	0.667133	0.94856
NM_013737	chr17	43568451	43612201	+	1901	1	Pla2g7|PAF-AH|R75400|-|17|17 B3|protein-coding	3.29839	3.29237	3.29942	3.29313	3.29787	0.104974	0.877424	0.984584
NM_025558	chr8	107150661	107187470	+	4287	1	Cyb5b|1810044O22Rik|AU015618|Cyb5m|-|8|8 D3|protein-coding	12.926	12.8911	12.9537	12.9744	12.9612	0.0671562	0.0619805	0.342359
NM_001346538	chr17	32685631	32703352	+	2128	1	Cyp4f15|AI787289|Cyp4f-15|-|17|17 B1|protein-coding	0	0	0	0	0	NA	1	1
NR_106096	chr8	121978024	121978086	+	62	1	Mir7237|Gm27482|mmu-mir-7237|-|8|8 E1|ncRNA	1.20365	1.20684	1.20153	1.20023	1.19808	-1.4803	0.272867	1
NM_001166029	chr4	155409190	155421996	+	2430	1	Cfap74|2010015L04Rik|A530045M11|-|4|4 E2|protein-coding	4.14333	4.12724	4.14384	4.13039	4.13187	0.00442688	0.993185	0.998293
NR_024323	chr2	18998319	18999804	+	1485	1	4930426L09Rik|-|-|2|2 A3|ncRNA	3.20411	3.21468	3.21718	3.21503	3.22442	0.785609	0.302284	0.778179
NM_053193	chr15	76595808	76607591	-	4477	1	Cpsf1|-|-|15|15 D3|protein-coding	11.7493	11.751	11.7171	11.76	11.7418	-0.0133764	0.768007	0.969756
NM_001293313	chr1	164307672	164437300	+	1721	1	Nme7|D530024H21Rik|Nm23-M7|Nm23-r7|-|1|1 H2.2|protein-coding	10.2081	10.2984	10.26	10.2507	10.2534	-0.00200233	0.977226	0.994877
NM_001004366	chr17	28142526	28171345	+	2959	1	Scube3|CEGF3|D030038I21Rik|-|17|17 A3.3|protein-coding	2.9066	2.89876	2.89732	2.89889	2.899	-0.380517	0.616604	0.941609
NM_001109991	chr10	77052179	77113705	-	5585	1	Col18a1|-|-|10 C1|10 39.72 cM|protein-coding	14.459	14.4315	14.4202	14.4165	14.4371	-0.023675	0.430482	0.863761
NR_045476	chr11	59725917	59740154	-	1105	1	1700007J10Rik|4930573L17Rik|-|11|11 B1.3|ncRNA	10.243	10.1995	10.2107	10.2262	10.2071	-0.0099387	0.882988	0.984626
NM_182785	chr7	24864620	24869691	-	1088	1	Lypd4|4933400F01Rik|-|7|7 A3|protein-coding	0	0	0	0	0	NA	1	1
NM_001109747	chr10	30196009	30200540	-	1507	1	Cenpw|2610036L11Rik|Cug2|-|10|10 A4|protein-coding	9.66413	9.63265	9.67529	9.6174	9.61285	-0.0262703	0.751117	0.966878
NR_002857	chr7	17672313	17682060	+	1917	1	Psg-ps1|AV036018|Cea-6|Cea6|-|7|7 A2|pseudo	0	0	0	0	0	NA	1	1
NM_183197	chr13	33324077	33335366	+	1899	1	Serpinb9f|BC052216|NK21|NK21L1|Spi13|ovalbumin|-|13 A3.3|13 13.86 cM|protein-coding	4.93339	4.94557	4.93456	4.92729	4.91776	-0.301434	0.43132	0.863761
NM_026527	chr11	30976707	30986365	-	1325	1	Chac2|-|-|11|11 A4|protein-coding	9.11145	9.04215	9.09162	9.08484	9.09005	0.0305562	0.75426	0.96688
NM_001282977	chr11	98001508	98022627	-	3508	1	Cacnb1|CAB1|Cchb1|Cchlb1|-|11 D|11 61.5 cM|protein-coding	6.25618	6.24457	6.23015	6.21372	6.21668	-0.302674	0.212612	0.679074
NM_001290648	chr4	103017873	103026842	-	675	1	Insl5|RIF2|-|4 C6|4 47.27 cM|protein-coding	0	0	0	0	0	NA	1	1
NM_030566	chr7	126428767	126445907	+	2524	1	Rabep2|2610011A08Rik|AI462746|Fra|-|7|7 F3|protein-coding	9.57846	9.56466	9.57319	9.55399	9.56967	-0.0117501	0.884742	0.984626
NM_181274	chr8	69705137	69716486	-	3241	1	Zfp869|1200003I07Rik|-|8|8 B3.3|protein-coding	9.77096	9.83687	9.84014	9.76452	9.77277	-0.0252248	0.759424	0.968508
NM_001162500	chr15	84326119	84342978	+	2685	1	Parvg|AI413459|-|15|15 E2|protein-coding	4.25202	4.25665	4.26813	4.25948	4.26845	0.428323	0.391957	0.840793
NM_010564	chr1	75507077	75510366	+	1471	1	Inha|AW555078|-|1 C4|1 39.16 cM|protein-coding	-1.86719	-1.86617	-1.86745	-1.86762	-1.86768	-2.07879	0.647706	1
NM_001310767	chr1	93825240	93852361	+	3494	1	D2hgdh|AA408776|AA408778|AI325464|-|1|1 D|protein-coding	7.93285	7.96512	7.93938	7.92559	7.96118	-0.0285057	0.838373	0.976797
NM_018754	chr4	133600556	133602168	-	1610	1	Sfn|Er|Mme1|Ywhas|-|4 D2.3|4 66.25 cM|protein-coding	5.03242	5.03778	5.02295	5.05699	5.03776	0.0951202	0.806824	0.973682
NM_008550	chr5	36806813	36830649	-	3413	1	Man2b2|mKIAA0935|-|5|5 B3|protein-coding	10.9446	10.8851	10.8593	10.8766	10.8749	-0.0648242	0.254311	0.733939
NM_172697	chr4	108564867	108579336	-	1507	1	Prpf38a|2410002M20Rik|-|4|4 C7|protein-coding	10.5596	10.5437	10.5885	10.5468	10.5725	0.0282064	0.645301	0.944779
NM_001161822	chr10	5825664	5922400	-	8182	1	Rgs17|6430507P11Rik|Rgsz2|-|10|10 A1|protein-coding	0.45751	0.456643	0.458629	0.45571	0.457209	0.0524508	0.976397	1
NM_025997	chr7	81762953	81769490	+	1418	1	Fam103a1|2410047I02Rik|2610204K14Rik|RAM|-|7|7 D3|protein-coding	10.1552	10.1596	10.1778	10.1747	10.1292	0.0048361	0.944503	0.991224
NM_001177699	chr5	35757880	35884979	+	3526	1	Ablim2|AI606905|C230091L11|-|5|5 B3|protein-coding	-1.86719	-1.86733	-1.86737	-1.86748	-1.86672	0.260813	0.95441	1
NM_001290381	chr7	3620324	3629929	-	1158	1	Tfpt|2400004F01Rik|AI450389|Amida|FB1|-|7|7 A1|protein-coding	9.06299	8.97482	9.01281	8.99935	9.05497	0.0106747	0.918879	0.989577
NM_145126	chr3	106201491	106219479	-	1497	1	Chil4|Chi3l4|Ym2|-|3|3 F2.2|protein-coding	0	0	0	0	0	NA	1	1
NM_024184	chr8	83955694	83970195	+	1593	1	Asf1b|1700003K02Rik|AA409591|-|8|8 C2|protein-coding	11.2806	11.2201	11.2736	11.3148	11.2941	0.0636464	0.227162	0.70064
NM_001115010	chr5	100442035	100498573	-	4579	1	Lin54|AI461788|-|5|5 E4|protein-coding	10.701	10.6218	10.6061	10.6373	10.6172	-0.0625896	0.318906	0.792654
NM_172671	chr2	109917647	110014257	+	5040	1	Lgr4|9130225G07|A330106J01Rik|A930009A08Rik|Gpr48|-|2|2 E3|protein-coding	11.871	11.8364	11.6114	11.6461	11.6387	-0.293334	1.45908e-10	4.69859e-09
NM_201407	chr3	90266514	90280665	+	5389	1	Dennd4b|-|-|3|3 F1|protein-coding	7.76521	7.78035	7.7983	7.78915	7.80897	0.110871	0.44767	0.873206
NM_001281491	chr17	26941452	26970645	+	4003	1	Syngap1|Gm1963|Syngap|-|17|17 A3.3|protein-coding	5.94555	5.86897	5.85463	5.90222	5.86258	-0.427806	0.188286	0.652451
NM_001128634	chr14	51918761	51920700	+	623	1	Tppp2|Gm1790|Gm77|-|14|14 C1|protein-coding	0	0	0	0	0	NA	1	1
NM_010287	chr9	14860210	14870789	+	3580	1	Gpr83|AW045253|Gir|Gpr72|RP105|RP39|RP82|-|9 A2|9 4.4 cM|protein-coding	0	0	0	0	0	NA	1	1
NM_001177543	chr2	175192005	175338212	-	4531	6	0610010B08Rik|Gm2026|-|2|2 H4|protein-coding	12.9366	12.9551	12.7967	12.7604	12.7076	-0.233983	2.62417e-08	7.0284e-07
NM_001040696	chr11	71153102	71230733	-	4142	1	Nlrp1b|ENSMUSG00000070390|Nalp1b|OTTMUSG00000006087|OTTMUSG00000006089|-|11|11 B4|protein-coding	-1.86719	-1.86733	-1.86737	-1.86748	-1.86672	0.260813	0.95441	1
NM_001134457	chr16	55839953	55895279	-	6422	1	Nxpe3|Fam55c|Gm1752|Gm611|-|16|16 C1.1|protein-coding	7.63363	7.54933	7.59102	7.60894	7.60865	0.0540772	0.745194	0.966157
NM_027584	chr1	98421124	98509380	+	2312	1	Slco6d1|4921511I05Rik|-|1|1 D|protein-coding	0	0	0	0	0	NA	1	1
NM_001324416	chr4	145585200	145625343	+	3506	1	Gm13212|OTTMUSG00000010965|-|4 E1|4|protein-coding	4.32753	4.34135	4.31271	4.32684	4.32577	-0.431317	0.364949	0.823604
NR_040658	chr10	84547417	84553338	-	1330	1	Platr7|C330046G13Rik|-|10 C1|10|ncRNA	-1.86719	-1.86733	-1.86737	-1.86748	-1.86672	0.260813	0.95441	1
NM_001134226	chrX	8454343	8461726	-	744	1	Ssxb2|-|-|X A1.1|X|protein-coding	0	0	0	0	0	NA	1	1
NM_145847	chr7	13084289	13085215	-	925	1	Vmn1r85|V1rj3|-|7|7 A1|protein-coding	0	0	0	0	0	NA	1	1
NM_026768	chr17	46111004	46128908	+	856	1	Mrps18a|1110004O20Rik|C79712|-|17|17 C|protein-coding	10.3806	10.3144	10.4224	10.4129	10.4235	0.120614	0.0660634	0.357615
NR_045825	chr17	54352583	54370074	-	737	1	1700025K24Rik|-|-|17|17 C|ncRNA	0	0	0	0	0	NA	1	1
NR_015506	chr17	87274886	87282814	-	1525	1	4833418N02Rik|-|-|17|17 E4|ncRNA	4.78742	4.78125	4.76255	4.77556	4.76631	-0.407865	0.308434	0.784309
NR_046014	chr2	147710693	147717632	+	1328	1	A530006G24Rik|Gm1003|-|2|2 G2|ncRNA	0	0	0	0	0	NA	1	1
NR_040750	chr3	159076364	159308080	+	2827	1	Gm20752|-|-|3|3 H4|ncRNA	1.54318	1.54141	1.54534	1.54133	1.54248	0.184571	0.881747	1
NM_011166	chr13	27312627	27319252	+	861	1	Prl6a1|Ghd10|PLP-B|Prlpb|-|13 A3.1|13 12.39 cM|protein-coding	0	0	0	0	0	NA	1	1
NM_054052	chr16	19760234	19772753	+	4542	1	B3gnt5|beta3GnT5|-|16|16 A3|protein-coding	-1.86719	-1.86737	-1.86631	-1.86759	-1.86764	0.260813	0.95441	1
NM_001286684	chr17	81373105	81738387	-	15833	1	Slc8a1|AI852629|AV344025|D930008O12Rik|Ncx1|-|17 E3|17 51.29 cM|protein-coding	0	0	0	0	0	NA	1	1
NR_035430	chr12	55370695	55491306	+	58	1	Mir1198|Mirn1198|mmu-mir-1198|-|X A1.1|X 3.52 cM|ncRNA	3.99408	3.98143	4.02455	3.99713	4.0037	1.06532	0.0810958	0.408403
NM_026057	chr6	116624016	116628999	-	3183	1	Zfp422|2900028O21Rik|AU041373|KOX15|Krox-25-2|Krox-26|Krox25|Krox26|Znf22|-|6|6 E3|protein-coding	9.00097	9.00633	8.96929	8.90102	8.99026	-0.123367	0.238833	0.715827
NM_133836	chr2	11705293	11733985	+	1708	1	Il15ra|AA690181|IL-15RA|-|2 A1|2 8.97 cM|protein-coding	7.80998	7.82662	7.84143	7.82015	7.84439	0.0702146	0.626413	0.943138
NM_178851	chr2	120316461	120353133	-	4320	1	Vps39|A230065P22Rik|AW743070|Vam6|Vam6P|mVam6|-|2|2 E5|protein-coding	10.7771	10.7965	10.7912	10.7923	10.7425	-0.018497	0.752967	0.966878
NM_130859	chr15	78775136	78803042	-	4705	1	Card10|AI449026|Bimp1|Carma3|-|15|15 E1|protein-coding	10.1064	10.0525	9.74075	9.83936	9.82162	-0.50163	7.5422e-10	2.26544e-08
NM_001331170	chr6	72359712	72362432	-	1424	1	Rnf181|1700047F16Rik|2500002L14Rik|6230415N01Rik|C77350|-|6|6 C1|protein-coding	10.9411	10.9471	10.9663	10.9273	10.9188	-0.0107636	0.846597	0.977994
NR_045909	chr11	109845878	109848476	+	386	1	1700023C21Rik|-|-|11|11 E1|ncRNA	0	0	0	0	0	NA	1	1
NR_040673	chr4	103382500	103492188	+	804	1	Gm12718|OTTMUSG00000008109|-|4|4 C6|ncRNA	0	0	0	0	0	NA	1	1
NM_001099326	chrX	8985940	8986672	-	730	1	Fthl17d|Fthl17L3|Gm14458|OTTMUSG00000016694|-|X A1.1|X|protein-coding	0	0	0	0	0	NA	1	1
NM_175684	chr18	37957434	37969731	-	4205	1	Fchsd1|A030002D08Rik|-|18|18 B3|protein-coding	8.04175	7.97413	8.00229	7.9939	8.012	-0.0183523	0.895684	0.986768
NM_001081368	chr16	22813214	22857669	-	2793	1	Tbccd1|5730478M09Rik|AU015083|BB165076|-|16|16 B1|protein-coding	9.86132	9.92694	9.82326	9.79248	9.79261	-0.174638	0.022831	0.167108
NR_131024	chr6	148659978	148678000	-	1719	1	4930528G23Rik|-|-|6|6 G3|ncRNA	0	0	0	0	0	NA	1	1
NR_138576	chr1	138876272	138876950	-	408	1	1700019P21Rik|-|-|1|1 E4|ncRNA	0	0	0	0	0	NA	1	1
NR_030647	chr13	50600972	50601080	-	108	2	Mir683-2|Gm23091|Mirn683-2|Mirn683b|mmu-mir-683|mmu-mir-683-2|-|13 A5|13|ncRNA	0	0	0	0	0	NA	1	1
NM_207622	chr11	74195505	74196446	+	940	1	Olfr403|IA7|MOR125-5_p|Olfr43|-|11|11 B5|protein-coding	0	0	0	0	0	NA	1	1
NM_001011869	chr6	42790041	42790994	+	952	1	Olfr452|MOR257-5P|-|6|6 B2.1|protein-coding	0	0	0	0	0	NA	1	1
NM_177161	chr7	100285520	100319699	+	2346	1	P4ha3|D930031A02Rik|-|7|7 E2|protein-coding	4.47601	4.47276	4.48149	4.4767	4.47515	0.110222	0.806921	0.973682
NM_144887	chr2	84687920	84715164	-	4726	1	Zdhhc5|1110032A17Rik|AI451382|Zisp|-|2|2 D|protein-coding	12.163	12.1313	12.1926	12.1768	12.2134	0.0612915	0.143027	0.570774
NR_046016	chr17	87192216	87194942	-	1392	1	C330024C12Rik|-|-|17|17 E4|ncRNA	0.354248	0.358258	0.353139	0.350573	0.352246	-2.19357	0.246462	1
NM_001162933	chr12	66283379	66284401	-	1020	1	Rpl10l|EG238217|-|12|12 C2|protein-coding	0	0	0	0	0	NA	1	1
NM_146040	chr12	117843861	117878706	+	2599	1	Cdca7l|BC006933|JPO2|-|12|12 F2|protein-coding	12.2663	12.351	12.4203	12.3663	12.3864	0.101581	0.0271228	0.190208
NM_145580	chr7	30565427	30567962	+	1179	1	Igflr1|F630003I17Rik|Tmem149|-|7|7 B1|protein-coding	7.35975	7.32852	7.36104	7.3112	7.34581	-0.0245646	0.888161	0.984857
NM_001025241	chrY	21164554	21166898	+	1117.8	4	Gm20747|-|-|Y|Y C1|protein-coding	0	0	0	0	0	NA	1	1
NM_199310	chr2	119017779	119029393	-	1864	1	Ccdc32|Gm631|-|2|2 E5|protein-coding	9.20616	9.22099	9.31782	9.3029	9.31051	0.218983	0.0149852	0.121343
NM_173019	chr9	108991902	109032225	+	3345	1	Pfkfb4|C230090D14|-|9|9 F2|protein-coding	9.11022	9.12027	9.3984	9.38549	9.41191	0.655786	1.30027e-12	4.76319e-11
NR_038297	chrY	24188633	24214668	-	747	5	Gm20857|-|-|Y|Y A2|pseudo	0	0	0	0	0	NA	1	1
NR_106072	chr15	79998970	79999026	-	56	1	Mir7213|Gm27377|mmu-mir-7213|-|15|15 E1|ncRNA	0	0	0	0	0	NA	1	1
NM_172565	chr11	100462612	100472782	-	2432	1	Klhl11|BC011167|-|11|11 D|protein-coding	10.8783	10.8337	10.8787	10.8933	10.8671	0.0367417	0.516315	0.906602
NM_198035	chr10	127739538	127747339	+	5946	1	Zbtb39|7030401O21Rik|mKIAA0352|-|10|10 D3|protein-coding	8.87686	8.89766	8.83223	9.00426	8.86464	0.0401341	0.754245	0.96688
NM_007939	chr4	136929419	136956816	-	4694	1	Epha8|AW047546|Eek|Hek3|mKIAA1459|-|4|4 D3|protein-coding	4.1596	4.14614	4.13121	4.12977	4.13501	-0.784122	0.11191	0.497435
NM_201232	chr15	8289824	8444463	-	10714	1	Nipbl|Idn3|-|15|15 A1|protein-coding	12.1774	12.1147	12.0898	12.211	12.0898	-0.0181098	0.74538	0.966179
NM_009081	chr7	4792965	4794547	+	489	1	Rpl28|D7Wsu21e|-|7 A1|7 2.77 cM|protein-coding	14.5123	14.5502	14.5356	14.5379	14.5799	0.0229942	0.484881	0.889799
NM_172473	chr10	45577829	45712345	+	3759	1	Hace1|1700042J16Rik|A730034A22Rik|BC025474|-|10|10 B2|protein-coding	9.91208	9.87434	9.89084	9.89899	9.82791	-0.0375636	0.631649	0.943384
NM_013784	chr1	105518422	105663676	-	6744	1	Pign|Gm20308|PIG-N|-|1|1 E2.1|protein-coding	12.8359	12.9026	12.8857	12.8897	12.8797	0.0176549	0.647801	0.945439
NM_001285487	chr4	115839198	115879256	+	2682	1	Mknk1|2410048M24Rik|Mnk1|-|4|4 D1|protein-coding	9.08092	9.02088	8.98593	9.07751	9.08438	0.000560207	0.99585	0.998735
NR_102685	chr16	36194480	36197886	-	3406	1	Gm6815|EG627962|-|16|16 B3|pseudo	-1.86561	-1.86744	-1.86751	-1.86774	-1.86781	-2.30448	0.573731	1
NM_007468	chr9	46240844	46243458	+	1661	1	Apoa4|Apoa-4|-|9 A5.2|9 25.36 cM|protein-coding	-1.86719	-1.86737	-1.86631	-1.86759	-1.86764	0.260813	0.95441	1
NM_013590	chr10	117287795	117292868	-	1259	1	Lyz1|Lyz|Lyzf3|Lzp-s|-|10|10 D2|protein-coding	-0.827169	-0.825289	-0.827579	-0.825955	-0.826107	-0.335807	0.906588	1
NM_001164663	chr2	157010442	157079265	-	13215	1	Soga1|9830001H06Rik|AI426038|D430036N24Rik|Soga|-|2|2 H1|protein-coding	9.82548	9.78148	9.76937	9.81848	9.73005	-0.0571087	0.487312	0.890749
NM_021523	chrX	151803282	151935417	+	14539	1	Huwe1|5430439H10Rik|AU041296|Arf-bp1|C430014N20Rik|C80292|Gm1718|Ib772|LASU1|Mule|Ureb1|-|X|X F3|protein-coding	13.8105	13.6954	13.7016	13.892	13.6873	0.0112314	0.910054	0.988713
NM_078477	chr10	80567121	80577296	-	2648	1	Klf16|AI843742|BTEB4|DRRF|-|10|10 C1|protein-coding	10.7578	10.7735	10.8852	10.8756	10.856	0.160601	0.00466005	0.0468115
NM_028918	chr11	100545632	100572566	+	2804	1	Ttc25|4933404O19Rik|-|11|11 D|protein-coding	3.96286	3.94674	3.94371	3.9409	3.94638	-0.484412	0.364863	0.823604
NM_053208	chr7	27158658	27166802	-	2099	1	Egln2|0610011A13Rik|C85656|Hif-p4h-1|Ier4|Phd1|SM-20|-|7 A3|7 15.83 cM|protein-coding	11.1804	11.1375	11.2323	11.204	11.2731	0.112324	0.0409894	0.257406
NM_001347657	chr7	126945987	126949581	-	1644	1	Asphd1|A830007L07Rik|Gm168|-|7|7 F3|protein-coding	3.01267	3.01077	2.99051	3.00248	2.99019	-1.38465	0.067777	0.363154
NM_001244891	chr2	90940397	91019497	+	7796	1	Celf1|1600010O03Rik|AA407467|Brunol2|CUG-BP|CUG-BP1|CUGBP|Cugbp1|D2Wsu101e|HNAB50|NAB50|-|2 E1|2 50.44 cM|protein-coding	13.1131	13.1102	13.0748	13.0949	13.0733	-0.0369292	0.280226	0.761169
NM_177115	chr18	56761716	56925548	-	1747	1	March3|6330411I15Rik|A530081L18Rik|AI843639|MARCH-III|-|18 D3|18|protein-coding	6.38578	6.43325	6.42856	6.42501	6.40197	0.0780983	0.749538	0.966563
NM_011131	chr7	44532744	44548815	-	3396	1	Pold1|125kDa|-|7 B3|7 28.83 cM|protein-coding	12.0172	12.0512	12.0917	12.0147	12.035	0.0156003	0.738627	0.964257
NM_001200055	chr5_JH584299_random	829034	841747	+	2895	5	Gm16513|-|-|5|5 E3|protein-coding	0	0	0	0	0	NA	1	1
NM_001201322	chr15	98571004	98589588	+	560	1	4930415O20Rik|-|-|15|15 F1|protein-coding	2.23838	2.23751	2.23195	2.23529	2.23424	-0.572406	0.54431	0.921851
NM_019865	chrX	134585654	134588062	+	482	1	Rpl36a|L44L|Rpl44|-|X|X E3|protein-coding	13.7656	13.7912	13.7573	13.7786	13.7675	-0.0127905	0.68711	0.952383
NM_001085535	chr11	117860752	117865543	+	1814	1	Tmem235|Cldn27|Gm12581|OTTMUSG00000007589|-|11|11 E2|protein-coding	2.68019	2.6742	2.68427	2.67985	2.68348	0.637719	0.467795	0.8801
NM_178595	chr2	32775821	32777593	+	906	1	Ptrh1|2210013M04Rik|AW046744|-|2|2 B|protein-coding	9.60018	9.51018	9.55344	9.51798	9.55875	-0.0228038	0.794955	0.973682
NM_001011527	chr7	108544527	108545498	+	970	1	Olfr503|MOR34-12|MOR34-8P|MOR34-9|Olfr1548|-|7|7 E3|protein-coding	0	0	0	0	0	NA	1	1
NR_039566	chr1	191998554	191998634	-	80	1	Mir3473c|mmu-mir-3473c|-|1 H6|1 97.11 cM|ncRNA	0.101042	0.102679	0.100003	0.0993649	0.0974033	-1.77116	0.378172	1
NM_013507	chr7	111067985	111083030	-	7736	1	Eif4g2|DAP-5|E130105L11Rik|Nat1|Natm1|p97|-|7 E3|7 58.0 cM|protein-coding	15.2368	15.2466	15.3048	15.3702	15.2953	0.0943301	0.00653885	0.0623578
NM_173420	chr14	69290398	69294299	-	2996	2	Synb|D930020E02Rik|syncytin-B|-|14|14 D2|protein-coding	0	0	0	0	0	NA	1	1
NM_027400	chr18	65980739	66002635	-	3560	1	Lman1|2610020P13Rik|AI326273|AU043785|C730041J05|ERGIC53|F5F8D|MCFD1|MR60|P58|gp58|-|18|18 E1|protein-coding	12.6755	12.6947	12.7131	12.6661	12.681	0.0013319	0.972387	0.994494
NR_130971	chr2	176892508	176927813	+	5173	2	2210418O10Rik|Gm6182|-|2|2 H4|protein-coding	8.50702	8.4452	8.46768	8.57352	8.50381	0.123031	0.34279	0.809992
NM_018784	chr16	58470541	58523312	-	1580	1	St3gal6|1700023B24Rik|AI930218|AW552396|Siat10|St3galVI|-|16|16 C1.2|protein-coding	2.86285	2.87166	2.87447	2.87484	2.86797	0.516257	0.533648	0.916501
NM_145568	chr6	71272019	71285319	+	1743	1	Krcc1|AA792894|-|6|6 C1|protein-coding	11.1007	11.1006	11.0458	11.0226	11.0428	-0.0924087	0.0779166	0.397485
NM_001164437	chr3	27866065	27896368	-	711	1	Tmem212|E030011K20Rik|Gm564|-|3|3 A3|protein-coding	-1.26938	-1.26967	-1.26802	-1.26831	-1.26998	1.25621	0.719277	1
NM_001085533	chr4	88793742	88795297	+	1553	2	Gm13275|OTTMUSG00000011268|-|4 C4|4|protein-coding	4.52176	4.50669	4.50232	4.50645	4.50826	-0.258492	0.558764	0.927834
NM_007564	chr12	80107760	80113013	-	2980	1	Zfp36l1|AW742437|AW743212|Berg36|Brf1|D530020L18Rik|ERF1|TIS11b|cMG1|-|12|12 C3|protein-coding	10.363	10.2488	9.53812	9.5705	9.56964	-1.32995	3.12007e-59	4.23565e-57
NM_028999	chr19	3454929	3575749	-	4930	1	Ppp6r3|4930528G08Rik|9130026N02Rik|D19Bwg1430e|D19Ertd703e|Pp6r3|Ppcs3|Pptcs3|Sapl|Saps3|mKIAA1558|-|19 A|19 3.21 cM|protein-coding	12.4568	12.4989	12.5118	12.4767	12.4954	0.0197119	0.62141	0.942039
NM_152822	chrX	95935313	95956974	-	2598	1	Las1l|1810030A06Rik|5830482G23Rik|-|X|X C3|protein-coding	10.7718	10.7629	10.7505	10.7359	10.8171	0.00253017	0.967367	0.993045
NR_015561	chr13	83728106	83735669	+	1364	1	C130071C03Rik|2810449C10Rik|-|13|13 C3|ncRNA	-0.416134	-0.41403	-0.414229	-0.41477	-0.414938	0.350508	0.885158	1
NM_001253860	chr9	119483408	119562678	-	8258	1	Scn5a|Nav1.5|Nav1.5c|SkM1|SkM2|mH1|-|9 F3|9 71.33 cM|protein-coding	5.91521	5.89402	5.92384	5.88452	5.89213	-0.0553651	0.847043	0.978151
NM_029049	chr11	121830218	121843436	+	3230	1	Ptchd3|4930451E13Rik|4933440L20Rik|RNDEu-3|-|11|11 E2|protein-coding	0	0	0	0	0	NA	1	1
NM_007868	chrX	82948870	85205050	+	13771	1	Dmd|DXSmh7|DXSmh9|Dp427|Dp71|dys|mdx|pke|-|X C1|X 38.38 cM|protein-coding	0.520259	0.521777	0.52137	0.518406	0.518186	-0.780473	0.644686	1
NM_001081473	chrX	94724569	94730191	+	5620	1	Zxdb|Zxda|-|X|X C3|protein-coding	0	0	0	0	0	NA	1	1
NM_001167994	chrX	134222955	134276984	-	3321	1	Trmt2b|4732479N06Rik|-|X|X E3|protein-coding	9.50699	9.54465	9.55482	9.54391	9.54614	0.0441874	0.592606	0.936383
NR_136761	chr12	13607789	13627646	-	2794	1	Gm35725|-|-|12 A1.1|12|ncRNA	0.813841	0.801328	0.803531	0.804658	0.802475	-1.45845	0.380492	1
NM_177661	chr3	59925214	59937949	+	2781	1	C130079G13Rik|-|-|3|3 D|protein-coding	0	0	0	0	0	NA	1	1
NM_026933	chr5	115341247	115343552	+	1045	1	Triap1|1810015M01Rik|AU020874|AU043831|P53csv|Wf-1|-|5|5 F|protein-coding	8.76804	8.83167	8.8855	8.86923	8.85945	0.185975	0.0822079	0.411247
NM_001012518	chr2	24790769	24919609	-	5078	1	Ehmt1|9230102N17Rik|D330003E03|Eu-HMTase1|GLP|GLP1|KMT1D|mKIAA1876|-|2|2 A3|protein-coding	11.5483	11.5175	11.4436	11.4974	11.4726	-0.0828364	0.0927498	0.444517
NR_029853	chrX	52741693	52741767	-	74	1	Mir363|Mirn363|mir-363|mmu-mir-363|-|X A5|X|ncRNA	0	0	0	0	0	NA	1	1
NR_045357	chr10	68319065	68321142	-	766	1	4930545H06Rik|-|-|10|10 B5.2|ncRNA	-1.86719	-1.86734	-1.86738	-1.86663	-1.86755	0.260813	0.95441	1
NM_001159389	chr10	51677760	51730429	+	3436	1	Rfx6|4930572O07Rik|Rfxdc1|-|10|10 B3|protein-coding	0	0	0	0	0	NA	1	1
NM_001145977	chr16	66655421	67620908	-	9526	1	Cadm2|2900078E11Rik|9330131D06|A830029E02Rik|Igdf4d|Igsf4d|NECL3|SynCAM 2|SynCAM2|-|16|16 C1.3-C2|protein-coding	0.532369	0.528518	0.528256	0.529421	0.527318	-0.930944	0.57897	1
NM_001289515	chr18	70508680	70530321	-	3552	1	Poli|Rad30b|-|18 44.48 cM|18 E2|protein-coding	8.13413	8.14209	8.11604	8.15864	8.09979	-0.0469463	0.724456	0.962429
NM_029379	chr9	40148122	40150878	+	985	1	Tmem225|1700030E15Rik|Tnen225|-|9|9 A5.1|protein-coding	0	0	0	0	0	NA	1	1
NR_106198	chr4	33438081	33438209	+	128	1	Mir8118|Gm27954|mmu-mir-8118|-|4|4 A5|ncRNA	1.14067	1.13907	1.13861	1.14104	1.13523	-0.473737	0.73604	1
NM_009910	chrX	101731535	101734147	-	1605	1	Cxcr3|Cd183|Cmkar3|-|X D|X 44.58 cM|protein-coding	0	0	0	0	0	NA	1	1
NM_198647	chr17	29549802	29606808	+	3476	1	Tbc1d22b|BC045600|-|17|17 A3.3|protein-coding	9.4435	9.4334	9.40117	9.48535	9.4736	0.0349089	0.698194	0.955694
NM_011173	chr16	62854307	62929342	+	3282	1	Pros1|AW214361|-|16|16 C1.3|protein-coding	10.7424	10.8086	10.7136	10.7122	10.7439	-0.0820552	0.171648	0.625901
NM_133655	chr7	143052750	143067930	+	1508	1	Cd81|Tapa-1|Tapa1|Tspan28|-|7 F5|7 88.1 cM|protein-coding	13.4406	13.4323	13.4441	13.4129	13.4265	-0.0102936	0.755662	0.967395
NM_054095	chr8	119446719	119472635	+	1956	1	Necab2|Efcbp2|-|8|8 E1|protein-coding	1.15867	1.1535	1.1482	1.14536	1.1488	-2.5631	0.0828277	1
NM_029037	chr8	25980604	25994121	-	3594	1	Pomk|4930444A02Rik|Sgk196|-|8|8 A2|protein-coding	9.72811	9.73299	9.77339	9.71273	9.71879	0.0075443	0.924686	0.990382
NR_103491	chr8	84913335	84922915	+	1171	1	Gm38426|-|-|8 C3|8|ncRNA	1.35069	1.35469	1.35855	1.35825	1.3542	1.40964	0.359479	1
NM_001324525	chr13	41118011	41174351	+	2491	1	Sycp2l|EG621792|Gm268|Gm40956|-|13|13 A3.3|protein-coding	-1.23488	-1.24035	-1.24048	-1.24077	-1.24081	-3.33727	0.280271	1
NM_027438	chr12	84146131	84148489	-	2356	1	Pnma1|5730402C15Rik|-|12|12 D1|protein-coding	5.85435	5.8522	5.84574	5.89046	5.84001	0.0750838	0.80247	0.973682
NM_201369	chr5	150635973	150665612	-	8974	1	N4bp2l2|2700092H06Rik|zag1|-|5|5 G3|protein-coding	12.1869	12.2166	12.2112	12.1823	12.1796	-0.0149411	0.717906	0.961907
NM_001163660	chr8	88527633	88594887	+	4094	1	Nkd1|2810434J10Rik|9030215G15Rik|Nkd|-|8|8 C3|protein-coding	0	0	0	0	0	NA	1	1
NR_040465	chr1	39842428	39847330	-	526	1	1700066B17Rik|-|-|1|1 B|ncRNA	-1.86719	-1.86737	-1.86631	-1.86759	-1.86764	0.260813	0.95441	1
NM_146171	chr6	125168007	125191586	-	4480	1	Ncapd2|2810406C15Rik|2810465G24Rik|CAP-D2|CNAP1|mKIAA0159|-|6|6 F2|protein-coding	12.1143	12.0659	12.0228	12.0653	12.0875	-0.0389157	0.395165	0.844682
NM_199473	chr4	126286794	126314330	+	4325	1	Col8a2|AI429819|-|4 D2.2|4 60.29 cM|protein-coding	1.46584	1.46698	1.46867	1.46874	1.46974	0.725464	0.584968	1
NM_007742	chr11	94936224	94953042	+	5877	1	Col1a1|Col1a-1|Cola-1|Cola1|Mov-13|Mov13|-|11 59.01 cM|11 D|protein-coding	7.97114	7.93802	7.73576	7.74374	7.7916	-0.774682	1.47299e-07	3.63575e-06
NM_029402	chr18	3383225	3436700	+	4135	1	Cul2|1300003D18Rik|4932411N15Rik|AI327301|mKIAA4106|-|18|18 A1|protein-coding	11.35	11.3071	11.3643	11.3211	11.3263	0.0125713	0.806291	0.973682
NM_007874	chr18	34344886	34373415	-	2890	1	Reep5|AI324241|AU022809|AW495741|DP1/TB2|Dp1|R74856|TB2/DP1|-|18|18 B1|protein-coding	12.2502	12.2408	12.2105	12.2053	12.2569	-0.0261236	0.53684	0.918525
NM_013818	chr15	79690896	79721479	+	3384	1	Gtpbp1|AL022987|AW045683|C85212|GP-1|Gtpbp|-|15|15 E1|protein-coding	11.1477	11.1676	11.2008	11.2329	11.2212	0.0865808	0.0927748	0.444517
NM_020036	chr13	3837757	3838671	+	912	1	Calm4|2310037J09Rik|AI649108|DD112|Scarf|-|13|13 A1|protein-coding	0	0	0	0	0	NA	1	1
NM_177846	chr2	121137292	121140698	-	3404	1	Lcmt2|D330024M17|Tyw4|-|2|2 E5|protein-coding	0	0	0	0	0	NA	1	1
NM_025772	chr13	44922080	45002096	-	1298	1	Dtnbp1|5430437B18Rik|AW048963|Bloc1s8|dysbindin|sdy|-|13 A5|13 21.73 cM|protein-coding	10.6161	10.5864	10.5585	10.5447	10.6219	-0.0392229	0.54439	0.921875
NM_001081671	chrX	155124981	155147849	-	1051	1	Cldn34b2|1700042B14Rik|-|X|X F3|protein-coding	0	0	0	0	0	NA	1	1
NR_026741	chrX	7375925	7378042	+	1876	1	Gm14379|OTTMUSG00000016482|-|X|X A1.1|ncRNA	4.04875	4.04093	4.04657	4.0509	4.03523	-0.0246101	0.963013	0.992755
NM_178069	chr16	30561369	30587589	-	2286	1	Lsg1|5830465I20|AA409273|D16Bwg1547e|-|16 B2|16 21.34 cM|protein-coding	11.4141	11.3626	11.3808	11.4177	11.4292	0.0310747	0.543928	0.921769
NM_001301341	chr13	58391132	58403343	-	2960	1	Hnrnpk|Hnrpk|KBBP|NOVA|-|13|13 B1|protein-coding	14.9605	14.984	14.9999	14.9513	14.9874	0.00830464	0.790695	0.97294
NM_010928	chr3	98013538	98150367	+	10470	1	Notch2|AI853703|N2|-|3 F2.2|3 42.42 cM|protein-coding	12.8329	12.7875	12.8155	12.8935	12.7888	0.0287735	0.53392	0.916501
NM_001167873	chr7	29983955	30028282	+	7168	1	Zfp568|C80731|Gm1691|Znf568|chato|-|7|7 B1|protein-coding	10.2836	10.285	10.3616	10.3509	10.3319	0.106364	0.102475	0.472518
NM_172205	chr7	30751471	30756134	+	2280	1	Sbsn|1110005D19Rik|AI747508|-|7 B1|7|protein-coding	5.09479	5.07515	5.07718	5.06503	5.07161	-0.285987	0.433479	0.866063
NM_001013816	chr14	51552790	51662953	+	1574	1	Gm5622|EG434459|-|14 C1|14|protein-coding	0.762617	0.761679	0.763617	0.762483	0.763815	0.507602	0.75806	1
NR_045310	chr15	80691025	80697610	-	4353	1	A430088P11Rik|-|-|15 E1|15|ncRNA	-1.86719	-1.86737	-1.86631	-1.86759	-1.86764	0.260813	0.95441	1
NR_040754	chr9	42182238	42209231	-	3532	1	4930546K05Rik|-|-|9|9 A5.1|ncRNA	0.859501	0.858543	0.858267	0.861095	0.862277	0.646806	0.692919	1
NM_001160402	chr16	32400506	32408227	+	1250	1	Tm4sf19|EG277203|-|16|16 B3|protein-coding	1.06296	1.06193	1.06604	1.06803	1.06056	0.914602	0.568911	1
NM_027475	chr14	20319859	20348121	-	3109	1	Ecd|5730461K03Rik|Hsgt1|-|14|14 A3|protein-coding	11.2049	11.2942	11.3075	11.3289	11.2931	0.0816752	0.138021	0.56145
NR_038073	chr18	35553410	35558316	+	1147	1	Snhg4|Gm17457|-|18 B2|18 19.14 cM|ncRNA	9.07314	9.03321	9.10218	9.0459	9.08904	0.0637974	0.518586	0.907698
NM_201640	chr4	115563649	115579015	+	2495	1	Cyp4a31|-|-|4|4 D1|protein-coding	0.802941	0.801984	0.806151	0.80278	0.802421	0.559588	0.73356	1
NR_028550	chr11	62603460	62603521	+	61	1	Snord49a|MBII-243|-|11 B2|11|snoRNA	5.64843	5.65555	5.62464	5.64284	5.64032	-0.233339	0.436678	0.868153
NM_011482	chr15	82041345	82047598	-	1252	1	Nhp2l1|FA-1|Fta1|Snu13|Ssfa1|-|15 E1|15 38.38 cM|protein-coding	12.5079	12.5581	12.537	12.5372	12.5653	0.0159214	0.690631	0.953549
NM_198438	chr4	106911470	107049694	+	3095	1	Ssbp3|2610021L12Rik|2610200M23Rik|5730488C10Rik|AI854733|AW551939|LAST|SSDP1|-|4|4 C7|protein-coding	10.9471	10.9543	10.8368	10.8553	10.8615	-0.147838	0.00699773	0.0658719
NM_001291212	chr11	77777235	77865988	+	7335	1	Myo18a|MAJN|MyoPDZ|MysPDZ|SP-R210|-|11|11 B5|protein-coding	12.0233	11.9963	11.9762	11.9825	11.9322	-0.0597112	0.180039	0.640382
NM_013790	chr16	20331304	20426394	-	5778	1	Abcc5|2900011L11Rik|AI132311|Abcc5a|Abcc5b|Mrp5|-|16 A3|16 12.41 cM|protein-coding	11.77	11.7974	11.6845	11.7419	11.6808	-0.108322	0.0240268	0.174048
NR_045139	chr11	87699524	87705327	+	2703	1	1110028F11Rik|-|-|11|11 C|ncRNA	4.27301	4.27737	4.25777	4.2699	4.26226	-0.420279	0.378369	0.83287
NM_001033668	chr14	31260375	31323896	-	12792	1	Dnah1|B230373P09Rik|Dnahc1|E030034C22Rik|MDHC7|-|14 B|14 19.1 cM|protein-coding	3.85794	3.85163	3.85118	3.86143	3.85623	0.0774618	0.890515	0.986082
NM_020564	chr8	123142847	123158280	-	1151	1	Sult5a1|Sult-x1|Sultx1|-|8|8 E1|protein-coding	1.46385	1.47246	1.46951	1.46779	1.47057	0.280663	0.836204	1
NM_013569	chr5	24319589	24351604	-	4204	1	Kcnh2|AI326795|ERG1|LQT|Lqt2|M-erg|Merg1|merg1a|merg1b|-|5 A3|5 10.94 cM|protein-coding	5.03138	5.02708	5.00536	5.01056	5.02202	-0.35616	0.336036	0.805959
NR_035526	chr12	109594956	109595030	+	74	1	Mir432|mmu-mir-432|-|12 F1|12 60.39 cM|ncRNA	0	0	0	0	0	NA	1	1
NM_146947	chr2	36376778	36377698	+	919	1	Olfr338|MOR136-5|-|2|2 B|protein-coding	0	0	0	0	0	NA	1	1
NM_013564	chr8	71689252	71690577	+	583	1	Insl3|Rlf|Rlnl|-|8 B3.3|8 34.43 cM|protein-coding	3.04305	3.05248	3.0371	3.03528	3.0508	-0.539163	0.479998	0.887109
NM_016676	chr12	3247428	3309969	-	3505	1	Rab10|AW107754|-|12 A1.1|12 1.71 cM|protein-coding	13.6022	13.6504	13.6478	13.6434	13.647	0.0224898	0.501729	0.897486
NM_001113549	chr7	27305141	27333648	-	5070	1	Ltbp4|2310046A13Rik|-|7|7 A3|protein-coding	9.72106	9.70224	9.60425	9.62545	9.65915	-0.159319	0.0476879	0.286107
NM_173765	chr5	76875935	76905514	-	3676	1	Aasdh|A230062G08Rik|A830035E16|Acsf4|U26|-|5|5 C3.3|protein-coding	9.01357	9.09273	9.05683	9.0621	9.0648	0.0151543	0.879038	0.984584
NM_001164212	chr6	137054825	137169718	-	2247	1	Rerg|-|-|6|6 G1|protein-coding	2.64715	2.64486	2.63887	2.63742	2.63799	-0.82444	0.310929	0.785534
NM_001163138	chr15	5097439	5108533	-	4525	1	Card6|D730008L15|-|15|15 A1|protein-coding	7.68271	7.64892	7.67803	7.72013	7.64998	0.0789417	0.622604	0.942138
NR_001583	chr7	3128146	3144992	+	771	1	Speer9-ps1|4930415A14Rik|SPEER-9|Speer9-ps|-|7|7 A1|pseudo	-1.86719	-1.86617	-1.86745	-1.86762	-1.86768	-2.07879	0.647706	1
NM_001177792	chr2	120567671	120600722	+	2212	1	Snap23|23kDa|AA408749|SNAP-23|Sndt|Syndet|-|2 60.37 cM|2 E5|protein-coding	11.1295	11.1727	11.2106	11.2281	11.2146	0.0938262	0.0709439	0.373745
NM_130867	chr3	87078592	87174747	-	7266	1	Kirrel|6720469N11Rik|Kirrel1|Neph1|-|3|3 F1|protein-coding	13.2572	13.1536	12.8416	12.9236	12.907	-0.380579	1.14984e-15	5.03858e-14
NM_181328	chr12	108825878	108835876	-	1958	1	Slc25a29|C030003J19Rik|CACL|mCACL|-|12|12 F1|protein-coding	7.84531	7.8888	8.02935	8.05549	8.01871	0.685882	3.68933e-06	7.30847e-05
NR_038079	chr3	52739724	52776654	+	1801	1	Gm2447|100039832|A530017F20|-|3|3 C|ncRNA	0	0	0	0	0	NA	1	1
NM_207238	chr7	28692849	28699337	+	1937	1	Fbxo27|E130008B10Rik|FBG5|Gm161|-|7|7 B1|protein-coding	0	0	0	0	0	NA	1	1
NM_001143777	chr10	70440668	70558732	+	3366	1	Fam13c|1200015N20Rik|C030038O19Rik|mKIAA1796|-|10|10 B5.3|protein-coding	5.8749	5.84539	5.84767	5.84676	5.87865	-0.0285347	0.922339	0.990099
NM_008767	chr7	143473755	143499332	+	1491	1	Slc22a18|AW260131|BWR1A|BWSCR1A|HET|ITM|Impt1|Orctl2|Slc22a1l|TSSC5|p45-BWR1A|-|7 F5|7 88.22 cM|protein-coding	-0.670815	-0.671144	-0.664604	-0.671313	-0.671351	2.01289	0.537822	1
NM_053188	chr17	74017706	74047916	-	847	1	Srd5a2|5ART2|S5AR 2|-|17|17 E2|protein-coding	-1.26938	-1.26967	-1.26802	-1.26831	-1.26998	1.25621	0.719277	1
NM_008625	chr2	14229414	14332023	+	5286	1	Mrc1|AW259686|CD206|MR|-|2 A2|2 10.46 cM|protein-coding	-1.86719	-1.86617	-1.86745	-1.86762	-1.86768	-2.07879	0.647706	1
NM_144847	chr15	76085594	76090013	-	2482	1	Nrbp2|BC011468|-|15|15 D3|protein-coding	8.30188	8.30464	8.43388	8.48585	8.42952	0.484147	0.000115255	0.00179118
NM_029352	chrX	73639441	73643514	+	2694	1	Dusp9|Dusp4|Mpk4|Pyst3|-|X|X A7.3|protein-coding	10.5527	10.5786	10.6545	10.5294	10.6068	0.0493705	0.481763	0.888397
NM_001290822	chr4	143267409	143299564	-	1793	1	Pdpn|Gp38|OTS-8|RANDAM-2|T1-alpha|T1a|T1alpha|-|4|4 E1|protein-coding	0	0	0	0	0	NA	1	1
NR_033513	chr2	75659290	75665756	+	1446	1	Gm6793|EG627828|-|8|8 E1|pseudo	12.4093	12.2323	12.244	12.2146	12.3915	-0.0486379	0.691366	0.954091
NM_001290797	chr1	37299838	37410740	+	5834	1	Inpp4a|107kDa|9630012D15|D130048C09Rik|R74740|-|1 B|1 15.46 cM|protein-coding	9.16429	9.03559	9.09463	9.21747	9.1484	0.128432	0.270069	0.751483
NM_009131	chr7	44303766	44306959	-	1950	1	Clec11a|AW457320|Clecsf3|Scgf|-|7|7 B3|protein-coding	5.97665	5.98413	5.99876	5.99103	5.99025	0.156367	0.561547	0.92953
NM_007659	chr10	69336635	69352912	-	2850	1	Cdk1|Cdc2|Cdc2a|p34<CDC2>|-|10 B5.3|10 36.07 cM|protein-coding	12.8741	12.904	12.8395	12.8083	12.8446	-0.0719341	0.0531457	0.307525
NM_013609	chr3	102469919	102521013	+	1190	1	Ngf|Ngfb|-|3 F2.2|3 45.25 cM|protein-coding	0.17807	0.176716	0.171628	0.173311	0.171295	-3.19062	0.121429	1
NM_145712	chr9	15862614	15874556	-	1240	1	Mtnr1b|Mel-1B-R|Mel1b|Mt2|-|9|9 A2|protein-coding	0	0	0	0	0	NA	1	1
NM_001198871	chr7	31703779	31705754	-	512	1	Scgb2b7|Abpbg7|Gm4684|-|7 B1|7|protein-coding	0	0	0	0	0	NA	1	1
NM_028248	chr2	128818303	128854261	+	4601	1	Tmem87b|2610301K12Rik|2810431I02Rik|AU014804|-|2|2 F1|protein-coding	10.3667	10.3577	10.4216	10.4223	10.3742	0.0721486	0.269541	0.751284
NM_019735	chr2	103073675	103092649	+	915	1	Apip|APIP2|CGI-29|Mmrp19|-|2|2 E2|protein-coding	9.74314	9.6746	9.70798	9.73385	9.72655	0.0294167	0.714436	0.961674
NM_015734	chr2	27886425	28039510	+	8334	1	Col5a1|AI413331|-|2 A3|2 19.38 cM|protein-coding	14.7002	14.6412	14.4987	14.5509	14.5108	-0.17417	7.56433e-07	1.65733e-05
NM_001085415	chr6	48436613	48445090	-	3259	1	Zfp467|1190001I08Rik|AB041616|AI426952|AV017623|EZI|MNCb-3350|Znf467|-|6|6 B2.3|protein-coding	0	0	0	0	0	NA	1	1
NM_025541	chr10	53596961	53609215	+	2176	1	Asf1a|2310079C17Rik|C79052|-|10|10 B3|protein-coding	9.70542	9.77102	9.7156	9.72436	9.75906	-0.0121957	0.879863	0.984584
NM_001012273	chr11	117849237	117855743	+	3411	1	Birc5|AAC-11|Api4|TIAP|survivin40|-|11|11 E2|protein-coding	12.3812	12.3811	12.3743	12.392	12.4118	0.0150749	0.702379	0.957815
NR_131107	chr14	24004991	24005837	+	461	1	4930519K11Rik|-|-|14|14 A3|ncRNA	0	0	0	0	0	NA	1	1
NR_040663	chr4	40313232	40317719	+	1807	1	4930509K18Rik|-|-|4|4 A5|ncRNA	-0.308724	-0.30417	-0.306757	-0.307322	-0.309207	-1.05879	0.661241	1
NM_009314	chr10	62252438	62265990	+	2251	1	Tacr2|Nk2r|Skr|Tac2r|-|10|10 B4|protein-coding	1.3942	1.39728	1.39199	1.39249	1.39022	-1.02529	0.412198	1
NM_030713	chr9	40192316	40213604	+	3868	1	Zfp202|C130037E22Rik|Znf202|-|9|9 A5.1|protein-coding	8.7508	8.82215	8.72633	8.81713	8.78417	-0.0291994	0.800644	0.973682
NR_037208	chrX	140310948	140311012	+	64	1	Mir3475|mir-3475|mmu-mir-3475|-|X F1|X 61.35 cM|ncRNA	0	0	0	0	0	NA	1	1
NM_024207	chr15	57869502	57892418	-	3135	1	Derl1|1110021N07Rik|AI195141|AW551338|Derlin-1|-|15|15 D1|protein-coding	11.9948	11.9689	11.9924	11.9842	11.964	-0.00193199	0.96398	0.992755
NM_008796	chr11	89982544	90002894	-	2836	1	Pctp|PC-TP|StarD2|-|11 C|11 54.7 cM|protein-coding	8.38549	8.37995	8.37336	8.34809	8.39331	-0.0346531	0.774057	0.971561
NM_008497	chr7	45420946	45421854	+	504	1	Lhb|Gm29035|LH|LH-B|LSH-B|LSH-beta|-|7 B3|7 29.3 cM|protein-coding	3.30538	3.30505	3.30985	3.31288	3.31211	0.481875	0.486211	0.890264
NR_029802	chr14	70443510	70443591	+	81	1	Mir320|Mirn320|mir-320|mmu-mir-320|-|14|14 D2|ncRNA	-1.86719	-1.86617	-1.86745	-1.86762	-1.86768	-2.07879	0.647706	1
NM_027519	chr5	149411806	149431703	+	2869	1	Medag|6330406I15Rik|Awms3|MEDA-4|Meda4|mAWMS3|-|5|5 G3|protein-coding	8.08872	8.02875	8.33026	8.2728	8.28482	0.887722	2.93437e-10	9.13083e-09
NM_026680	chr1	133309823	133323026	+	1835	1	Golt1a|0610012C01Rik|Kiss1|metastatin|-|1|1 E4|protein-coding	0	0	0	0	0	NA	1	1
NR_028543	chr1	161038092	161038156	+	64	1	Snord47|MBII-96|-|1 H2.1|1|snoRNA	7.1746	7.12137	7.15571	7.14395	7.13505	-0.017818	0.923712	0.990371
NM_026951	chr8	3458817	3467648	-	1119	1	Pex11g|1810022F11Rik|1810049N02Rik|Pex11c|Pex11gamma|-|8|8 A1.1|protein-coding	6.8171	6.78585	6.77645	6.78406	6.79074	-0.126771	0.534797	0.916501
NM_153097	chr8	64998448	65018688	-	3629	1	Trim60|2czf45|Rnf33|-|8|8 B3.1|protein-coding	0	0	0	0	0	NA	1	1
NM_029841	chr4	147940895	147947314	+	2726	1	2510039O18Rik|Kiaa2013|-|4|4 E2|protein-coding	11.1719	11.1663	11.2484	11.2017	11.2109	0.0726761	0.163646	0.611298
NM_153601	chr1	31176435	31204725	+	1896	1	Lgsn|Gluld1|Lgs|lengsin|-|1|1 B|protein-coding	0.81498	0.816851	0.818728	0.821112	0.818901	1.89154	0.323275	1
NM_001011695	chr2	85607964	85608908	-	943	1	Olfr1000|MOR175-9|-|2|2 D|protein-coding	0	0	0	0	0	NA	1	1
NM_007542	chrX	73483601	73495936	+	2413	1	Bgn|BG|DSPG1|PG-S1|PGI|SLRR1A|-|X A7.3|X 37.33 cM|protein-coding	4.91715	4.9115	4.8631	4.87574	4.8768	-0.958054	0.0124585	0.105063
NM_001195579	chrX	144456582	144477063	+	3575	1	Trpc5os|ENSMUSG00000072934|Gm15070|OTTMUSG00000018931|-|X F2|X|protein-coding	10.8328	10.8598	10.8558	10.8247	10.8815	0.0111386	0.847704	0.97838
NM_145561	chr5	86302854	86373387	-	2034	1	Tmprss11d|AST|AsP|BC020151|-|5|5 E1|protein-coding	0	0	0	0	0	NA	1	1
NM_019440	chr11	58214977	58222783	+	3510	1	Irgm2|AI481100|GTPI|Ifggd2|Iigp2|-|11|11 B1.3|protein-coding	4.34228	4.33671	4.33484	4.33236	4.33482	-0.188581	0.685138	0.951583
NM_172582	chr12	84361968	84373796	+	1588	1	Coq6|5930427M12Rik|AW742344|-|12|12 D1|protein-coding	9.94131	9.9568	10.018	9.9608	9.96538	0.0575487	0.43946	0.868861
NR_126451	chr5	11109800	11126455	-	781	2	4930558F17Rik|-|-|5 A1|5|ncRNA	0	0	0	0	0	NA	1	1
NR_028264	chr14	61602836	61682373	-	1687	1	Dleu2|1810047A16Rik|4932411A06Rik|7730401J12Rik|AI197277|AI788824|Alt1|Gm9069|Leu2|-|14 D1|14 33.16 cM|ncRNA	6.77589	6.74317	6.7595	6.76824	6.743	-0.018232	0.930618	0.990382
NM_011404	chr8	121881146	121907686	-	3501	1	Slc7a5|4F2LC|D0H16S474E|LAT1|TA1|-|8 E1|8 70.8 cM|protein-coding	13.2921	13.2886	13.3051	13.3047	13.3113	0.0201113	0.537264	0.918683
NM_009735	chr2	122147687	122153082	+	852	1	B2m|Ly-m11|beta2-m|beta2m|-|2 E5|2 60.55 cM|protein-coding	13.3935	13.44	13.4146	13.3914	13.4116	-0.0139921	0.687582	0.952383
NR_029772	chr7	61877770	61877864	-	94	1	Mir344|Mirn344|mir-344-1|mmu-mir-344|-|7 C|7|ncRNA	0	0	0	0	0	NA	1	1
NM_001048145	chr8	113643213	113655533	+	824	1	Syce1l|4930481F22Rik|MMRP|PSESS|mmrp2|-|8|8 E1|protein-coding	3.03933	3.03993	3.045	3.04342	3.04654	0.482462	0.524731	0.911517
NM_134003	chr10	128543565	128547744	-	2084	1	Zc3h10|AI790326|-|10|10 D3|protein-coding	9.03301	9.04271	9.04558	9.0715	9.13226	0.112684	0.268542	0.749849
NR_040770	chr9	92718716	92795711	+	1703	1	4933400C23Rik|4933400C23|-|9|9 E3.3|ncRNA	0	0	0	0	0	NA	1	1
NR_110955	chr4	12039356	12088007	-	3580	1	Tmem67|5330408M12Rik|B230117O07|b2b1163.1Clo|b2b1291.1Clo|-|4|4 A1|protein-coding	8.51289	8.50178	8.5124	8.43796	8.53371	-0.0359246	0.773084	0.971561
NR_038175	chr7	84689640	84776549	+	1712	1	2610206C17Rik|-|-|7|7 D3|ncRNA	4.57122	4.56154	4.56359	4.56808	4.56445	-0.0277744	0.949099	0.991224
NM_022996	chr18	38418975	38464406	+	927	1	Ndfip1|0610010M22Rik|N4wbp5|-|18|18 B3|protein-coding	10.8663	10.8888	10.9044	10.8635	10.9571	0.0466484	0.44528	0.871368
NM_178259	chr11	9191942	9684259	+	15947	1	Abca13|9830132L24|A930002G16Rik|AI956815|-|11|11 A1|protein-coding	3.50227	3.5178	3.50193	3.51614	3.50488	-0.147902	0.82081	0.974996
NM_013739	chr13	55523235	55528538	-	1539	1	Dok3|AI450713|Dokl|-|13|13 B1|protein-coding	4.27579	4.26223	4.26994	4.27371	4.2874	0.311528	0.537227	0.918683
NM_027301	chr10	127898535	127911759	+	2843	1	Sdr9c7|1810054F20Rik|Rdh20|Rdhs|SDR-O|Sdro|-|10|10 D3|protein-coding	0	0	0	0	0	NA	1	1
NM_026029	chr11	76220395	76243699	-	2512	1	Glod4|1700082G03Rik|2700085E05Rik|C81254|-|11|11 B5|protein-coding	11.3167	11.3817	11.341	11.3514	11.3366	-0.0110227	0.829269	0.976155
NM_178267	chr8	79028437	79193766	+	7587	1	Zfp827|2810449M09Rik|D630040G17Rik|Znf827|-|8|8 C1|protein-coding	9.31205	9.24402	9.18722	9.24612	9.23882	-0.118594	0.214466	0.681748
NM_011158	chr12	31958479	32061279	-	3345	1	Prkar2b|AI451071|AW061005|PKARIIbeta|Pkarb2|RII(beta)|-|12|12 A3|protein-coding	13.0912	13.1271	13.0594	13.0367	13.0534	-0.0727028	0.0398788	0.253071
NM_001160142	chrY	64301785	64786299	-	1214	1	Gm20867|-|-|Y|Y D|protein-coding	0	0	0	0	0	NA	1	1
NR_033225	chr2	20968874	20970348	+	1383	1	Gm13375|OTTMUSG00000011664|-|2|2 A3|ncRNA	6.49018	6.48504	6.51128	6.52881	6.5373	0.346565	0.131407	0.546319
NM_016737	chr19	7020696	7040026	-	2157	1	Stip1|Hop|Sti1|p60|-|19|19 A|protein-coding	13.1936	13.2074	13.2079	13.1483	13.2096	-0.0143355	0.706273	0.958937
NM_009827	chr5	53698485	53707704	-	2922	1	Cckar|AW106902|-|5 C1|5 29.52 cM|protein-coding	0	0	0	0	0	NA	1	1
NM_001033795	chrX	144688907	145122410	+	3625	1	Zcchc16|C230031A03Rik|Mar4|-|X|X F2|protein-coding	0	0	0	0	0	NA	1	1
NM_183038	chr8	19052826	19064810	-	249	1	Defb39|BD-39|-|8|8 A1.3|protein-coding	0	0	0	0	0	NA	1	1
NM_027189	chr7	19564949	19573343	-	759	1	Gemin7|2400008I04Rik|AI120175|AI461688|-|7|7 A3|protein-coding	10.1266	10.187	10.2028	10.1904	10.2295	0.0855464	0.22377	0.69599
NM_198296	chr19	45818144	45998488	-	2868	1	9130011E15Rik|AI431055|AW050122|-|19|19 C3|protein-coding	8.69402	8.70719	8.69791	8.73506	8.73389	0.0611639	0.571763	0.932049
NM_001080935	chr11	97840780	97843043	+	1184	1	B230217C12Rik|AI840637|-|11|11 D|protein-coding	1.67688	1.68493	1.67739	1.67777	1.68222	-0.375793	0.752953	1
NM_145356	chr18	75820178	76148564	+	4565	1	Zbtb7c|B230208J24Rik|Kr-pok|Zbtb36|-|18|18 E3|protein-coding	8.34868	8.33095	8.20572	8.18509	8.19586	-0.474019	9.89575e-05	0.00156245
NR_045957	chr13	31213410	31241086	-	838	1	4930401O12Rik|-|-|13|13 A3.2|ncRNA	0	0	0	0	0	NA	1	1
NM_001305258	chr2	94411727	94438186	-	3730	1	Api5|AAC-11|AI196452|API-5|-|2|2 E1|protein-coding	13.045	13.1145	13.1311	13.0903	13.0858	0.0257791	0.518972	0.907923
NM_177648	chr2	30284229	30286354	-	2123	1	Dolk|BC026973|Tmem15|mKIAA1094|-|2|2 B|protein-coding	9.5625	9.65652	9.63484	9.56203	9.67826	0.0293668	0.757234	0.968054
NM_010615	chr19	37376403	37421859	+	4795	1	Kif11|Eg5|Kif8|Kifl1|Knsl1|-|19|19 C2|protein-coding	13.0944	13.1305	13.029	13.0191	12.9963	-0.119193	0.000934695	0.0118523
NM_177465	chr17	30954683	31010710	+	5019	1	Umodl1|D17Ertd488e|-|17 A3.3|17 15.8 cM|protein-coding	0	0	0	0	0	NA	1	1
NM_009602	chr3	89753448	89764632	-	5376	1	Chrnb2|Acrb-2|Acrb2|C030030P04Rik|[b]2-nAchR|-|3 F1|3 39.19 cM|protein-coding	7.43396	7.42909	7.49056	7.48003	7.44769	0.212221	0.204232	0.672065
NR_045172	chr3	45280439	45378260	-	913	1	2610316D01Rik|-|-|3|3 B|ncRNA	7.91925	7.90466	7.8919	7.91866	7.87677	-0.063502	0.653043	0.946388
NM_172381	chr4	58800031	58912725	-	5850	1	AI314180|AW558785|BB181316|mKIAA0368|-|4|4 B3|protein-coding	13.6955	13.6461	13.6889	13.7487	13.704	0.0517277	0.16356	0.611288
NM_172711	chr5	69556924	69574652	+	4999	1	Guf1|4631409J12|AA407526|EF-4|-|5|5 C3.1|protein-coding	10.8202	10.786	10.7977	10.7628	10.7479	-0.0509169	0.384768	0.83496
NM_173416	chr12	4843303	4852913	+	2932	1	BC068281|A430092C04|Wdcp|-|12|12 A1.1|protein-coding	8.46168	8.42607	8.39485	8.37794	8.36755	-0.198752	0.0929589	0.444937
NM_008747	chr12	16653470	16660236	+	1541	1	Ntsr2|NT2R|NTRL|-|12 A1.1|12 7.98 cM|protein-coding	0	0	0	0	0	NA	1	1
NM_176847	chr11	115315192	115321918	-	3178	1	Ush1g|Sans|js|-|11 E2|11 80.84 cM|protein-coding	7.62723	7.54491	7.6344	7.58538	7.55982	0.0330991	0.850447	0.97906
NM_001159966	chr1	156804166	156939387	-	6868	1	Ralgps2|1810020P17Rik|2210408F11Rik|4921528G01Rik|9130014M22Rik|AU043409|AW046161|-|1|1 G3|protein-coding	-1.30824	-1.30852	-1.30692	-1.30881	-1.30733	1.20694	0.733148	1
NM_001291236	chr11	78178658	78180819	+	1597	1	Tlcd1|-|-|11|11 B5|protein-coding	8.68419	8.61017	8.65119	8.63092	8.67659	0.0182941	0.873842	0.984584
NM_025333	chr19	10500512	10525209	-	3091	1	Sdhaf2|0610038F07Rik|AA407634|AW049997|-|19|19 A|protein-coding	10.3601	10.3835	10.3407	10.353	10.3665	-0.0307727	0.631356	0.943384
NM_010419	chr4	154960923	154962371	+	1268	1	Hes5|bHLHb38|-|4 E2|4 86.01 cM|protein-coding	-1.86719	-1.86734	-1.86738	-1.86663	-1.86755	0.260813	0.95441	1
NM_001347244	chr16	59612949	59639409	-	1940	1	Arl6|1110018H24Rik|2210411E14Rik|BBS3|-|16|16 C1.3|protein-coding	9.73958	9.823	9.81117	9.83736	9.82667	0.0797011	0.318716	0.792612
NM_027656	chr2	181390886	181424388	-	2008	1	Zbtb46|2610019F01Rik|4933406L05Rik|BZEL|Btbd4|-|2|2 H4|protein-coding	3.08022	3.08025	3.08519	3.08137	3.07949	0.147493	0.840156	0.976797
NM_011625	chr12	111828458	111908055	-	4314	1	Ppp1r13b|AI449786|ASPP1|AW545810|Tp53bp2|Trp53bp2|p85|-|12|12 F1|protein-coding	9.08477	9.14915	9.13075	9.16807	9.1894	0.106524	0.280237	0.761169
NM_001302505	chr11	102284939	102289427	+	2691	1	Tmub2|2010008E23Rik|-|11|11 D|protein-coding	9.94745	9.92868	9.9467	9.93881	9.98198	0.034038	0.643693	0.944296
NM_028005	chr11	69059775	69061576	+	1799	1	Borcs6|2310047M10Rik|-|11|11 B3|protein-coding	8.78419	8.82515	8.84998	8.87992	8.84419	0.140096	0.184161	0.646779
NM_028185	chr11	45928269	45944935	-	6447	1	Lsm11|2210404M20Rik|AV079530|-|11|11 B1.1|protein-coding	10.3661	10.4141	10.4627	10.4547	10.431	0.0946937	0.143075	0.570774
NM_145439	chr11	117765985	117780683	-	2890	1	Tmc6|D11Ertd204e|EVER1|-|11 E2|11 82.96 cM|protein-coding	8.709	8.7032	8.76305	8.71152	8.73905	0.087973	0.418219	0.85783
NM_001114400	chrX	148663604	148703849	+	2011	2	Gm15127|ENSMUSG00000072928|OTTMUSG00000019138|-|X|X F2|protein-coding	7.87123	7.90915	7.83576	7.89987	7.93523	0.00325104	0.983412	0.996446
NR_045918	chr11	14560336	14599225	-	558	1	1700046C09Rik|-|-|11|11 A2|ncRNA	0	0	0	0	0	NA	1	1
NM_146013	chr11	4031782	4048009	+	2928	1	Sec14l4|AI256582|AW536553|SPF|TAP|-|11|11 A1|protein-coding	0.669754	0.671219	0.670804	0.667832	0.669321	-0.492893	0.760082	1
NM_133706	chr11	78541817	78550735	-	1328	1	Tmem97|1810014L12Rik|AI115531|AL022956|D11Bhm182e|-|11 B5|11 46.74 cM|protein-coding	11.843	11.8609	11.8914	11.8471	11.8701	0.0223207	0.61626	0.941609
NM_007801	chr9	90054267	90076095	+	1609	1	Ctsh|AL022844|-|9 E3.1|9 47.4 cM|protein-coding	9.68114	9.71655	9.77345	9.742	9.79993	0.141188	0.0786087	0.399155
NM_146349	chr2	87544607	87545542	-	934	1	Olfr1128|MOR176-3|-|2|2 D|protein-coding	0	0	0	0	0	NA	1	1
NM_027980	chr11	120369562	120378746	-	3163	1	Faap100|2310003H01Rik|-|11|11 E2|protein-coding	10.0158	9.96924	10.0087	10.0068	9.98048	0.0120261	0.868626	0.982784
NM_011103	chr14	30595354	30626208	-	2755	1	Prkcd|AI385711|D14Ertd420e|PKC[d]|PKCdelta|Pkcd|-|14 B|14 18.82 cM|protein-coding	10.5117	10.4594	10.4756	10.4727	10.4656	-0.0217525	0.729552	0.962722
NM_146218	chr8	111270944	111300222	-	4428	1	Rfwd3|BC027246|-|8|8 E1|protein-coding	11.9488	12.0375	12.0695	12.0939	12.0611	0.103174	0.0295361	0.203882
NM_001011845	chr7	103320413	103321360	+	946	1	Olfr597|GA_x5J8B7TU1BB-380-666|MOR23-2|-|7|7 E3|protein-coding	0	0	0	0	0	NA	1	1
NM_175425	chr5	43601922	43616586	+	1269	1	C1qtnf7|5530401N20Rik|8430425G24Rik|Ctrp7|-|5|5 B3|protein-coding	0	0	0	0	0	NA	1	1
NM_133815	chr1	181815315	181842401	-	3536	1	Lbr|AI505894|ic|-|1 H5|1 84.89 cM|protein-coding	13.3356	13.3522	13.2913	13.2937	13.2926	-0.061865	0.0584084	0.328506
NM_175149	chr8	124635756	124663369	-	3301	1	2310022B05Rik|-|-|8|8 E2|protein-coding	10.8525	10.8087	10.8706	10.9109	10.8982	0.0961552	0.0932652	0.445479
NR_038153	chr6	91440987	91441755	+	484	1	1810044D09Rik|-|-|6|6 D1|ncRNA	4.38834	4.39279	4.38414	4.38015	4.40073	-0.0732275	0.877122	0.984584
NM_173744	chr8	13952008	13974777	-	2458	1	Tdrp|2610019F03Rik|-|8|8 A1.1|protein-coding	-0.541012	-0.539082	-0.544228	-0.544389	-0.544439	-3.67699	0.148741	1
NM_001013365	chr11	4236785	4241026	+	1902	1	Osm|OncoM|-|11 A1|11 2.94 cM|protein-coding	0	0	0	0	0	NA	1	1
NR_105907	chr13	21396578	21396638	-	60	1	Mir6942|Gm27287|mmu-mir-6942|-|13|13 A3.1|ncRNA	2.1195	2.11633	2.11318	2.1166	2.11386	-0.509647	0.605462	0.938945
NM_023158	chr11	70454234	70459984	-	2441	1	Cxcl16|0910001K24Rik|AV290116|BB024863|CXCL16v1|CXCL16v2|SR-PSOX|Zmynd15|b2b498Clo|-|11|11 B3|protein-coding	4.51654	4.49787	4.51135	4.50333	4.51841	0.125266	0.785075	0.972001
NM_011893	chr5	34525784	34563639	+	2930	1	Sh3bp2|3BP2|-|5|5 B2|protein-coding	10.3337	10.3143	11.0109	11.0065	11.0308	1.09468	4.53252e-73	7.13203e-71
NM_025390	chr7	38262820	38271348	-	1205	1	Pop4|1110023P21Rik|Rpp29|-|7|7 B3|protein-coding	9.75596	9.78804	9.84443	9.80864	9.80686	0.0895078	0.247074	0.725146
NR_105753	chr2	29475215	29475294	-	79	1	Mir133c|Gm27865|mmu-mir-133c|-|2|2 B|ncRNA	-0.773214	-0.773572	-0.769335	-0.773721	-0.772127	1.86415	0.537043	1
NM_001163042	chr8	71251124	71272590	-	1657	1	Haus8|2410004L22Rik|Hice1|-|8|8 B3.3|protein-coding	10.136	10.1531	10.2238	10.2048	10.1986	0.110432	0.10381	0.475888
NM_010113	chr3	129677577	129755322	-	4729	1	Egf|AI790464|-|3 G3|3 58.5 cM|protein-coding	5.05223	5.05503	5.03095	5.03738	5.04371	-0.345727	0.343103	0.809992
NR_045050	chr12	35672291	35695118	-	921	1	9130015A21Rik|100043575|Gm4527|-|12|12 A3|ncRNA	0	0	0	0	0	NA	1	1
NM_001285512	chr2	125830302	125859082	-	3349	1	Cops2|AI315723|C85265|Csn2|Sgn2|TRIP-15|Trip15|-|2 F1|2 61.76 cM|protein-coding	13.4101	13.4775	13.542	13.5205	13.5095	0.0941112	0.0111593	0.0956203
NR_105891	chr11	74868127	74868194	-	67	1	Mir6926|Gm27949|mmu-mir-6926|-|11|11 B5|ncRNA	-1.26944	-1.26793	-1.26983	-1.26832	-1.27006	-1.12315	0.744474	1
NM_026813	chr15	89211559	89286261	+	3464	1	Ppp6r2|1110033O10Rik|8430411H09Rik|B230107H12Rik|Pp6r2|Saps2|-|15|15 E3|protein-coding	10.6963	10.659	10.667	10.6543	10.6764	-0.017108	0.772468	0.971513
NM_001029990	chr14	51884842	51891868	+	1607	1	Mettl17|2310032K15Rik|D14Ertd209e|Mett11d1|-|14 C1|14 26.71 cM|protein-coding	7.48006	7.51165	7.47541	7.51117	7.48487	-0.027726	0.865181	0.98249
NM_013895	chr10	80899450	80900969	-	1220	1	Timm13|D10Ertd378e|Tim9|Timm9|-|10 C1|10 39.72 cM|protein-coding	10.9297	10.9348	10.998	10.9887	11.0259	0.106631	0.0513556	0.300378
NM_199148	chr13	60781887	60786364	-	1338	1	BC051665|-|-|13|13 B2|protein-coding	0	0	0	0	0	NA	1	1
NM_017476	chr17	32321424	32350577	-	2056	1	Akap8l|HAP95|Nakap95|-|17|17 B1|protein-coding	10.1942	10.2336	10.1075	10.1085	10.1188	-0.17808	0.00869389	0.0780196
NM_153108	chr8	19445770	19447606	-	282	1	Defb8|BD-8|Defr1|-|8|8 A1.3|protein-coding	0	0	0	0	0	NA	1	1
NM_139197	chr2	28496891	28505415	+	1326	1	Gbgt1|Fgs|Fs|-|2|2 A3|protein-coding	2.03589	2.02803	2.03413	2.02394	2.03722	-0.0309442	0.978353	1
NM_026250	chr1	97770172	97793708	+	2775	1	Gin1|4930429M06Rik|8430411H10Rik|Gin-1|Zh2c2|-|1|1 D|protein-coding	9.3644	9.4134	9.36711	9.35312	9.37485	-0.0540802	0.536053	0.917745
NR_126043	chr10	80115803	80130685	+	3868	1	Stk11|AA408040|Lkb1|Par-4|R75140|-|10|10 C1|protein-coding	11.6576	11.6191	11.6561	11.6152	11.6673	0.0115538	0.810912	0.973682
NM_173400	chr4	86581285	86612022	-	3676	1	Haus6|6230416J20Rik|9830144E06|D4Ertd27e|mKIAA1574|-|4 C4|4 40.69 cM|protein-coding	12.2183	12.2391	12.1923	12.1726	12.2171	-0.0445054	0.285145	0.765641
NM_007376	chr6	128483567	128526720	-	4643	1	Pzp|A1m|A2m|AI893533|MAM|-|6 F3|6 63.02 cM|protein-coding	5.65843	5.6594	5.66609	5.65196	5.64336	-0.0764189	0.799515	0.973682
NM_177256	chr2	80292470	80295358	+	2886	1	Prdx6b|1-cysPrx-P1|4930414C22Rik|Aop2-rs1|Prdx5-rs1|Prdx6-ps1|Prdx6-rs1|Prdx6-rs1-ps|-|2 C3|2 48.03 cM|protein-coding	0	0	0	0	0	NA	1	1
NR_045379	chr18	10706860	10711832	+	1550	1	4930563E18Rik|-|-|18|18 A1|ncRNA	-1.86561	-1.86744	-1.86751	-1.86774	-1.86781	-2.30448	0.573731	1
NM_175152	chr4	151982638	151988986	-	1108	1	Thap3|2010013E08Rik|2210418H06Rik|-|4|4 E2|protein-coding	6.31758	6.32918	6.34608	6.33843	6.32371	0.122484	0.611619	0.9402
NM_001293650	chr9	22002988	22014245	+	2066	1	Prkcsh|80K-H|PKCSH|-|9 A3|9 8.04 cM|protein-coding	11.5397	11.5067	11.5606	11.5522	11.578	0.0562182	0.235086	0.711492
NM_021382	chr3	134829007	134934581	+	3757	1	Tacr3|Nk3r|Nkr|Tac3r|-|3|3 G3|protein-coding	-0.393474	-0.389008	-0.393743	-0.392094	-0.392264	-1.22188	0.620755	1
NM_001037913	chr4	43493365	43495921	+	806	1	Ccdc107|-|-|4|4 A5|protein-coding	10.3332	10.3172	10.3585	10.3208	10.3827	0.0489622	0.463692	0.880071
NR_029566	chr2	74726070	74726137	+	67	1	Mir10b|Mirn10b|mir-10b|mmu-mir-10b|-|2|2 C3|ncRNA	0	0	0	0	0	NA	1	1
NR_102323	chr13	24937401	24939049	+	1466	1	9330162012Rik|-|-|13|13 A3.1|ncRNA	0	0	0	0	0	NA	1	1
NR_040592	chr3	136435270	136449349	-	980	1	1700030L20Rik|-|-|3|3 G3|ncRNA	0	0	0	0	0	NA	1	1
NR_045086	chr13	93706100	93719175	-	947	1	AW495222|-|-|13 C3|13|ncRNA	-0.396519	-0.3944	-0.394601	-0.393356	-0.396984	0.386326	0.880577	1
NM_017480	chr1	60977914	61000321	+	3248	1	Icos|AILIM|CCLP|CRP-1|H4|Ly115|-|1 C2|1 30.6 cM|protein-coding	0	0	0	0	0	NA	1	1
NR_102388	chr11	103697724	103725573	+	3465	1	C130046K22Rik|-|-|11 E1|11|ncRNA	2.65841	2.65765	2.66316	2.66274	2.66457	0.657117	0.453889	0.876202
NM_009678	chr9	21295457	21312333	-	1719	1	Ap1m2|D9Ertd818e|[m]1B|mu1B|-|9 A3|9 7.76 cM|protein-coding	-1.22967	-1.22801	-1.22811	-1.2303	-1.23033	-1.12444	0.733838	1
NM_001142411	chr2	150218099	150244874	+	6914	1	Zfp937|EG245174|Gm4979|ZIPO-I|-|2|2 G3|protein-coding	9.64569	9.62914	9.64448	9.63665	9.55962	-0.0473843	0.580851	0.933386
NM_145403	chr9	45172726	45204075	-	2252	1	Tmprss4|mCAP2|-|9|9 A5.2|protein-coding	0	0	0	0	0	NA	1	1
NM_001099738	chr16	91614257	91618999	-	3531	1	Dnajc28|BC020175|ORF28|-|16|16 C3.3|protein-coding	1.68273	1.69565	1.68548	1.68362	1.68133	-1.15273	0.33452	1
NM_175375	chr18	36560603	36658908	+	8195	1	Ankhd1|1110004O12Rik|4933432B13Rik|9130019P20Rik|A530027J04Rik|A630021B20Rik|AA571404|Mask|mFLJ00246|mKIAA1085|-|18|18 B2|protein-coding	11.6502	11.571	11.5139	11.6202	11.5688	-0.0559017	0.325351	0.80003
NM_009789	chrX	162961992	162964599	-	475	1	S100g|AU042539|CABP1|CaBP-D9K|Cabp9k|Calb3|-|X|X F4|protein-coding	0.0945679	0.0966115	0.096392	0.0975578	0.0972516	1.03808	0.633494	1
NM_029366	chr8	70513396	70523180	-	1209	1	Kxd1|0610030B01Rik|2810422J05Rik|C78305|-|8|8 B3.3|protein-coding	9.50251	9.51115	9.49593	9.52405	9.45294	-0.0331502	0.701252	0.957271
NM_213729	chr11	70688361	70700155	-	1209	1	Inca1|AI842396|-|11|11 B3|protein-coding	4.67662	4.67536	4.6859	4.69905	4.69274	0.493552	0.255368	0.734236
NM_008635	chr10	20148920	20281590	+	3851	1	Map7|E-MAP-115|MAP-7|Mtap7|R75000|mshi|mste|ste|-|10 A3|10 9.75 cM|protein-coding	-0.687649	-0.688151	-0.69072	-0.690862	-0.689085	-2.18958	0.391088	1
NR_030154	chrX	66792595	66792661	-	66	1	Mir471|Mirn471|mir-471|mmu-mir-471|-|X A7.1|X|ncRNA	0	0	0	0	0	NA	1	1
NM_025807	chr10	70245276	70285951	+	3555	1	Slc16a9|1200003C15Rik|4930425B13Rik|AI552636|-|10|10 B5.3|protein-coding	0.337503	0.344381	0.343841	0.336812	0.33673	-0.774214	0.851784	1
NM_133806	chr1	170141223	170174964	-	3068	1	Uap1|AA420407|AA437972|AGX-1|AGX-2|AGX1|AgX|ESTM38|SPAG2|-|1|1 H3|protein-coding	11.9108	11.9319	12.0609	12.0289	12.0351	0.155682	0.000294326	0.00423212
NM_001205219	chr8	45507788	45827906	+	6068	1	Sorbs2|2010203O03Rik|9430041O17Rik|A530071H08|Argbp2|mKIAA0777|nArgBP2|-|8|8 B1.1|protein-coding	4.06456	4.06178	4.10464	4.09581	4.11846	2.92424	0.000184651	0.00276119
NM_138595	chr19	30098441	30175441	-	3758	1	Gldc|D030049L12Rik|D19Wsu57e|-|19 C1|19 24.87 cM|protein-coding	0.91716	0.918528	0.915889	0.920537	0.916561	-0.0654711	0.965906	1
NM_147043	chr7	104938528	104939481	+	952	1	Olfr669|MOR34-6|-|7|7 E3|protein-coding	0	0	0	0	0	NA	1	1
NM_019632	chr2	148694657	148732420	-	3680	1	Napb|Brp14|E161|I47|SNARE|b-SNAP|-|2|2 G3|protein-coding	7.92044	7.86888	7.91898	7.88802	7.89527	0.0254229	0.859838	0.981234
NM_001039049	chr12	102899306	102900534	+	472	1	Cox8c|1700007F21Rik|COX8-3|COXVIII-3|-|12|12 E|protein-coding	0	0	0	0	0	NA	1	1
NM_025696	chr19	48206025	48805505	+	5605	1	Sorcs3|6330404A12Rik|AW045579|-|19|19 D1|protein-coding	1.98116	1.982	1.98575	1.99223	1.986	1.38284	0.255796	1
NM_025746	chr1	23100474	23102253	-	1777	1	4933415F23Rik|-|-|1|1 A5|protein-coding	0	0	0	0	0	NA	1	1
NM_011669	chr5	146734812	146794956	-	4263	1	Usp12|Ubh1|-|5|5 G3|protein-coding	11.1178	11.0907	11.1013	11.1561	11.1901	0.0673077	0.238667	0.715688
NM_177889	chr7	30056034	30072823	-	2098	1	Zfp82|A030010D05|Krab16|Mszf3|Zfp-82|-|7|7 B1|protein-coding	6.42319	6.39819	6.36838	6.35479	6.36732	-0.426524	0.0651884	0.354264
NM_001256382	chr15	39198286	39684372	+	7375	1	Rims2|2810036I15Rik|AW048769|RIM2|Rab3ip2|Rim2(+40A)|Rim2(+44A)|Rim2(+4A)|Serg2|Syt3-rs|mKIAA0751|-|15 B3.1|15 15.45 cM|protein-coding	0.0667927	0.0605482	0.0627804	0.0602374	0.0637179	-0.87702	0.68393	1
NR_040520	chr6	82877866	82881853	-	1827	1	2310069B03Rik|-|-|6|6 C3|ncRNA	0.854323	0.858125	0.855303	0.85228	0.853758	-0.883349	0.560413	1
NM_177055	chr1	85717083	85736606	-	1928	1	A630001G21Rik|-|-|1|1 C5|protein-coding	8.62372	8.63787	8.61951	8.65261	8.60782	-0.0121182	0.913354	0.988977
NM_012028	chr3	152820710	152982207	-	1992	1	St6galnac5|AI851940|Siat7e|-|3|3 H3|protein-coding	0.14482	0.138514	0.143089	0.140103	0.138104	-0.730912	0.731152	1
NM_054084	chr7	114718643	114723365	+	955	1	Calcb|CGRP2|Calc2|-|7|7 F1|protein-coding	0	0	0	0	0	NA	1	1
NM_011289	chr11	101442245	101445596	+	727	1	Rpl27|-|-|11|11 D|protein-coding	13.9664	14.0547	13.9845	14.1352	13.9927	0.032718	0.541673	0.920764
NM_134209	chr7	12321208	12322128	-	919	1	Vmn1r83|V1rg8|-|7|7 A1|protein-coding	0	0	0	0	0	NA	1	1
NM_001081750	chr5	124862705	124888630	+	4072	1	Zfp664|AW060232|D930038J03Rik|ZFOC1|Znf664|-|5|5 F|protein-coding	12.1925	12.2868	12.2897	12.3047	12.274	0.0605451	0.189592	0.654196
NM_011156	chr10	45067214	45158995	+	2702	1	Prep|AI047692|AI450383|D10Wsu136e|PEP|Pop|-|10 B2|10 23.27 cM|protein-coding	11.7457	11.8189	11.82	11.7772	11.7939	0.0169079	0.726389	0.962429
NM_001002267	chr9	123259057	123260789	-	1730	1	Tmem158|2310037P21Rik|Ris1|-|9|9 F4|protein-coding	7.13371	7.1397	7.10258	7.09778	7.09999	-0.219927	0.219068	0.688637
NM_026185	chr11	77515117	77520628	+	3245	1	Abhd15|1300007F04Rik|-|11|11 B5|protein-coding	5.60681	5.59987	5.60949	5.59375	5.60942	0.0141631	0.963176	0.992755
NM_029836	chrX	152336852	152342484	-	2749	1	Tspyl2|CDA1|CINAP|DENTT|DXBwg1396e|DXHXS1008E|E130307F10Rik|-|X F3|X 68.46 cM|protein-coding	9.81323	9.7455	9.96034	9.96323	10.0205	0.383041	1.39863e-06	2.93881e-05
NM_011514	chrX	8061171	8074760	-	3108	1	Suv39h1|AI852103|AL022883|DXHXS7466e|H3-K9-HMTase 1|KMT1A|mIS6|-|X A1.1|X 3.64 cM|protein-coding	11.4248	11.4045	11.4601	11.4246	11.3821	0.0104833	0.840872	0.976797
NM_029930	chr6	42672547	42693059	-	3728	1	Tcaf1|2810407D09Rik|3321401G04Rik|A230020K05Rik|AI848529|Fam115a|-|6 B2.1|6|protein-coding	9.74625	9.8166	9.81508	9.7784	9.76447	0.00462917	0.954061	0.992083
NM_146243	chr11	20062304	20112951	-	3658	1	Actr2|4921510D23Rik|AA409782|Arp2|D6Ertd746e|-|11 A3.1|11 12.88 cM|protein-coding	13.1522	13.1028	13.1199	13.1827	13.1966	0.048333	0.241003	0.717624
NM_001109993	chr2	25620066	25622005	-	1049	1	Tmem141|1110065P14Rik|AI663999|D2Ertd217e|-|2 A3|2 17.57 cM|protein-coding	7.49773	7.54108	7.52494	7.53057	7.51958	0.0239115	0.882132	0.984626
NM_001081680	chr13	74371426	74376566	-	1624	1	Zfp72|Zfp74|-|13|13 C1|protein-coding	7.871	7.93866	7.92293	7.93905	7.92028	0.0855306	0.556923	0.926555
NM_001159573	chr5	74535482	74597124	+	3062	1	Fip1l1|1300019H17Rik|Rje|-|5|5 C3.3|protein-coding	11.6656	11.6457	11.6111	11.6479	11.6326	-0.0327001	0.479741	0.887109
NM_001290303	chr12	100125450	100159653	-	3709	1	Nrde2|6720454P05Rik|-|12|12 E|protein-coding	10.105	10.1208	10.1549	10.18	10.1236	0.0692337	0.325943	0.800378
NM_183170	chr8	70758649	70760921	-	948	1	Mpv17l2|Fksg24|-|8|8 B3.3|protein-coding	8.73787	8.75795	8.83453	8.7746	8.86371	0.208355	0.0642549	0.351397
NM_027008	chr17	24047720	24073485	-	2449	1	Kctd5|2610030N08Rik|mKIAA0176|-|17|17 A3.3|protein-coding	11.2203	11.1908	11.1715	11.1484	11.1393	-0.0746748	0.149343	0.582523
NM_016912	chr5	92006074	92043042	-	4050	1	Cdkl2|5330436L21Rik|AI505225|KKIAMRE|Kkm|-|5|5 E2|protein-coding	9.18167	9.21642	9.21502	9.1423	9.20662	-0.026719	0.78233	0.972001
NM_178280	chr18	80966374	80986578	-	6882	1	Sall3|B130022O04Rik|Msal|Msal-1|Sal|Salt|Spalt|-|18|18 E3|protein-coding	-0.827169	-0.825289	-0.827579	-0.825955	-0.826107	-0.335807	0.906588	1
NR_035433	chr3	34638464	34638542	+	78	1	Mir1897|Mirn1897|mmu-mir-1897|-|3 A3|3 16.93 cM|ncRNA	-1.86719	-1.86737	-1.86631	-1.86759	-1.86764	0.260813	0.95441	1
NM_145078	chr4	147611936	147642508	-	2554	1	Zfp979|2610305D13Rik|Ssm1b|-|4|4 E1|protein-coding	11.3829	11.3495	11.4391	11.3567	11.4289	0.0592588	0.275306	0.756886
NM_178087	chr9	58217180	58249786	-	5366	1	Pml|1200009E24Rik|AI661194|Trim19|-|9 B|9 31.63 cM|protein-coding	10.5414	10.4995	10.3911	10.3972	10.3965	-0.201575	0.00128205	0.015586
NM_001164362	chr19	38055042	38074425	+	2749	1	Cep55|1200008O12Rik|2700032M20Rik|-|19|19 C2|protein-coding	12.3155	12.3255	12.2444	12.2712	12.2701	-0.0741085	0.062346	0.343399
NM_022993	chr14	54464147	54470291	+	3003	1	Lrp10|Lrp9|-|14|14 C2|protein-coding	12.4656	12.4028	12.4043	12.4539	12.4581	0.00721975	0.868504	0.982784
NM_030564	chr5	122850188	122868945	+	1946	1	Rnf34|AW061037|AW536122|BC004042|C88279|RIFF|-|5|5 F|protein-coding	9.81855	9.87914	9.88826	9.88484	9.91456	0.0855863	0.263976	0.745102
NM_011287	chr17	28328471	28331033	+	822	1	Rpl10a|CsA-19|Nedd6|-|17|17 A3.3|protein-coding	14.3188	14.382	14.4426	14.3881	14.3751	0.0592794	0.11662	0.51033
NM_144551	chr12	15791727	15816785	-	4193	1	Trib2|AW319517|TRB-2|TRB2|-|12|12 A1.1|protein-coding	5.81595	5.8228	5.83164	5.85533	5.8801	0.50971	0.0947187	0.450402
NM_001011787	chr2	111944516	111945454	-	937	1	Olfr1307|MOR245-19P|-|2|2 E3|protein-coding	0	0	0	0	0	NA	1	1
NM_133803	chr19	4907229	4928287	-	2663	1	Dpp3|4930533O14Rik|C86324|-|19|19 A|protein-coding	11.0769	11.121	11.1903	11.1714	11.1587	0.105118	0.0480249	0.287133
NM_027315	chr3	89773609	89783997	+	3066	1	Ube2q1|1110002C01Rik|2310012M18Rik|AI854014|Gtap|NICE-5|PRO3094|Ube2q|-|3|3 F1|protein-coding	11.8302	11.8407	11.8301	11.8047	11.7837	-0.0394717	0.379217	0.83287
NM_145925	chr10	77581767	77598732	+	2239	1	Pttg1ip|1810010L20Rik|AI314311|AU018448|C79540|-|10|10 C1|protein-coding	11.6696	11.7108	11.9502	11.9176	11.9109	0.311245	1.61197e-11	5.56633e-10
NR_029838	chr2	29845631	29845727	-	96	1	Mir219a-2|Mir219-2|Mirn219-2|mir-219a-2|mmu-mir-219a-2|-|2|2 B|ncRNA	-0.245221	-0.245965	-0.24618	-0.248659	-0.246954	-1.2658	0.567527	1
NR_045151	chr1	51218386	51333779	-	2547	1	9330175M20Rik|-|-|1 C1.1|1|ncRNA	-0.151486	-0.157786	-0.155504	-0.156121	-0.158126	-1.37677	0.547186	1
NR_105026	chr9	61103012	61105386	-	1844	1	4933433G08Rik|-|-|9|9 B|ncRNA	0	0	0	0	0	NA	1	1
NM_021793	chr17	26113316	26123253	+	3448	1	Tmem8|AW490096|M83|Tmem8a|-|17|17 A3.3|protein-coding	9.02257	9.05704	9.05971	9.06353	9.09182	0.0766821	0.429886	0.863761
NM_008545	chr2	121953771	121956092	-	2319	1	Mageb3|Mage-b3|Mage-ps1|Mage-rs3|Smage3|-|2|2 E5|protein-coding	3.41039	3.39661	3.41706	3.40007	3.40991	0.38523	0.58152	0.933386
NM_001081286	chr8	44950208	45052257	+	14599	1	Fat1|2310038E12Rik|AU023433|Fath|mFat1|-|8 B1.1|8 24.81 cM|protein-coding	13.5158	13.4079	13.281	13.4717	13.2764	-0.139396	0.212532	0.679074
NR_029460	chr2	29245116	29252993	-	4290	1	6530402F18Rik|mKIAA1857|-|2|2 B|ncRNA	0	0	0	0	0	NA	1	1
NM_011582	chr13	92751586	92794818	-	3178	1	Thbs4|TSP4|-|13 C3|13 47.75 cM|protein-coding	-1.86719	-1.86737	-1.86631	-1.86759	-1.86764	0.260813	0.95441	1
NM_010214	chr10	85097019	85102495	-	2666	1	Fhl4|-|-|10|10 C1|protein-coding	6.19007	6.18537	6.18604	6.18343	6.18266	-0.0385626	0.876418	0.984584
NR_105817	chr15	87795850	87795943	-	93	1	Mir6393|Gm27424|mmu-mir-6393|-|15|15 E3|ncRNA	0	0	0	0	0	NA	1	1
NM_013488	chr6	124864693	124888209	-	3083	1	Cd4|L3T4|Ly-4|-|6 F2|6 59.17 cM|protein-coding	-0.507663	-0.513938	-0.511514	-0.51418	-0.514237	-2.3552	0.365551	1
NM_146364	chr7	108395122	108396114	+	991	1	Olfr495|MOR204-37|-|7|7 E3|protein-coding	0	0	0	0	0	NA	1	1
NR_052011	chr8	85007203	85014531	-	2201	1	Best2|Vmd2l1|-|8|8 C3|protein-coding	0.333584	0.335589	0.337516	0.334722	0.337814	1.33007	0.525614	1
NR_110508	chr16	22874983	22894386	-	1765	1	Gm30505|-|-|16 B1|16|ncRNA	2.36889	2.35972	2.35423	2.3616	2.36039	-0.699856	0.453521	0.876079
NM_145360	chr13	8885606	8892396	+	2860	1	Idi1|4832416K17Rik|-|13|13 A1|protein-coding	11.8947	11.9258	11.9051	11.8798	11.9214	-0.0114552	0.79653	0.973682
NM_001347119	chr10	80258151	80261012	-	1028	1	Gamt|AA571402|Spintz1|-|10 C1|10 39.72 cM|protein-coding	8.24033	8.22965	8.26851	8.26039	8.28826	0.128906	0.302967	0.778414
NM_001290337	chr17	47688474	47694736	-	1383	1	Prickle4|Gm939|-|17|17 C|protein-coding	2.82187	2.82225	2.83179	2.81092	2.81512	-0.26534	0.753873	0.966878
NR_030730	chr9	35848545	35849880	-	517	1	Gm3428|-|-|9 A4|9|ncRNA	0	0	0	0	0	NA	1	1
NM_009555	chr17	23173869	23193228	-	4071	1	Zfp40|CTfin12|NTfin12|Zfp-40|-|17 A3.3|17 11.56 cM|protein-coding	8.79826	8.77762	8.8574	8.94516	8.88573	0.291895	0.00793159	0.0726886
NM_026034	chr5	21645984	21662592	+	2006	1	Armc10|2810037C14Rik|Svh|-|5|5 A3|protein-coding	9.91487	9.98015	9.97393	9.91919	9.95592	0.000709068	0.992594	0.998169
NM_026061	chr19	44550254	44555415	-	634	1	Ndufb8|2900010I05Rik|AI987932|-|19|19 C3|protein-coding	12.3676	12.4467	12.464	12.4243	12.4279	0.037311	0.396968	0.845065
NM_021325	chr16	44765736	44794977	+	1882	1	Cd200r1|CD200R|Mox2r|OX2R|-|16|16 B4|protein-coding	-1.86719	-1.86734	-1.86738	-1.86663	-1.86755	0.260813	0.95441	1
NM_133867	chr3	107877230	107892900	+	2249	1	Eps8l3|AI504489|Eps8r3|-|3|3 F2.3|protein-coding	5.78545	5.80705	5.80388	5.77841	5.78196	-0.113203	0.697501	0.955553
NM_011078	chr13	48801750	48870885	-	5236	1	Phf2|GRC5|-|13 A5|13 24.96 cM|protein-coding	10.9692	10.8914	10.902	10.9091	10.9086	-0.0337168	0.559203	0.928319
NM_010917	chr13	13437602	13512275	+	6024	1	Nid1|A630025O17|Nid|entactin|entactin-1|nidogen-1|-|13 A1|13 5.26 cM|protein-coding	4.41614	4.40703	4.40277	4.39296	4.41237	-0.287674	0.536403	0.918231
NM_001033277	chr15	102116528	102136215	-	2424	1	Spryd3|BC008150|-|15|15 F2|protein-coding	10.5779	10.6515	10.717	10.6503	10.7235	0.125979	0.0565279	0.321423
NM_007439	chr17	71868988	72604307	-	5887	1	Alk|CD246|Tcrz|-|17 E1.3|17 43.77 cM|protein-coding	-0.131069	-0.134877	-0.137469	-0.135726	-0.137741	-2.83089	0.204726	1
NM_011029	chr9	120127766	120132369	+	1852	1	Rpsa|67kDa|67lr|AL022858|Lamr|Lamr1|Lamrl1|MLR|P40|P40-3|P40-8|-|9 F4|9 71.41 cM|protein-coding	15.7826	15.8174	15.8432	15.846	15.8543	0.0544147	0.0521404	0.303739
NM_028157	chr13	59700083	59706197	-	4271	1	Spata31d1a|1700013B16Rik|Fam75d1a|Fam75d3|-|13|13 B2|protein-coding	0	0	0	0	0	NA	1	1
NM_009147	chr12	58958384	59012017	-	4086	1	Sec23a|Msec23|Sec23r|-|12|12 C1|protein-coding	12.1223	12.117	12.096	12.1002	12.0479	-0.0493898	0.255079	0.734013
NM_001081328	chr18	59175340	59411336	+	3877	1	Chsy3|4833446K15Rik|AI662215|-|18|18 D3|protein-coding	0	0	0	0	0	NA	1	1
NM_177725	chr2	30237769	30263790	+	4248	1	Lrrc8a|Lrrc8|mKIAA1437|-|2|2 B|protein-coding	10.6832	10.6298	11.1296	11.1685	11.1355	0.73682	1.61964e-37	1.52566e-35
NR_040356	chr2	57127477	57181754	-	1096	1	BB557941|-|-|2 C1.1|2|ncRNA	0.782817	0.776586	0.778696	0.783435	0.77942	0.359158	0.83514	1
NM_007943	chr4	109280275	109387816	+	5155	1	Eps15|2410112D09Rik|-|4|4 C7|protein-coding	11.7803	11.806	11.81	11.8623	11.8211	0.0501984	0.276379	0.757521
NM_028844	chr2	112492964	112631253	+	1407	1	Aven|1700013A01Rik|1700056A21Rik|mAven-L|mAven-S|-|2|2 E3|protein-coding	8.85611	8.8774	8.9513	8.90809	8.92597	0.158417	0.122844	0.526142
NM_020626	chrX	164090187	164118859	+	1254	1	Tmem27|0610008J07Rik|NX-17|NX17|-|X|X F5|protein-coding	-1.30824	-1.30852	-1.30692	-1.30881	-1.30733	1.20694	0.733148	1
NM_009984	chr13	64361890	64370520	-	3499	1	Ctsl|1190035F06Rik|CatL|Ctsl1|MEP|fs|nkt|-|13 B3|13 33.26 cM|protein-coding	13.3746	13.4195	13.4083	13.3868	13.3839	-0.00594145	0.864402	0.982421
NM_139134	chr16	78930948	78951728	+	2522	1	Chodl|3110074E07Rik|MT75|PRED12|-|16|16 C3.1|protein-coding	0	0	0	0	0	NA	1	1
NM_177777	chr11	113684412	113694647	+	2189	1	D11Wsu47e|-|-|11 E2|11 79.15 cM|protein-coding	8.55313	8.5261	8.56431	8.56201	8.54273	0.0506123	0.655347	0.946987
NM_010740	chr2	148436651	148443535	-	6634	1	Cd93|6030404G09Rik|AA145088|AA4.1|AW555904|C1qr1|C1qrp|Ly68|-|2 G3|2 73.48 cM|protein-coding	1.08548	1.08391	1.08122	1.08039	1.08696	-0.561542	0.698256	1
NM_001077631	chr9	64960832	64986981	+	2881	1	Vwa9|2010321M09Rik|-|9|9 C|protein-coding	10.4338	10.3721	10.4868	10.479	10.4448	0.110817	0.091516	0.441411
NM_146259	chr7	127865359	127876823	-	3446	1	Zfp668|BC030314|E130018B19Rik|Znf668|-|7|7 F3|protein-coding	9.05287	9.05696	9.11229	9.07623	9.09357	0.0939242	0.326846	0.800978
NM_009930	chr1	45311538	45349706	+	5511	1	Col3a1|AW550625|Col3a-1|Tsk-2|Tsk2|-|1 C1.1|1 23.67 cM|protein-coding	11.5136	11.413	11.4732	11.4614	11.4124	-0.0192892	0.730638	0.962722
NM_001004150	chr15	83226722	83251774	-	2087	1	A4galt|-|-|15|15 E1|protein-coding	3.59439	3.59042	3.62136	3.63652	3.60979	2.74042	0.00229436	0.0256527
NM_009179	chr8	110919865	110972497	+	4461	1	St3gal2|AI429591|AW822065|ST3GalII|Siat5|-|8|8 E1|protein-coding	11.2078	11.1695	11.3351	11.3427	11.3354	0.212004	2.64956e-05	0.000458033
NM_011597	chr19	24094502	24225026	-	4587	1	Tjp2|ZO-2|-|19|19 B|protein-coding	10.9581	10.9718	10.9324	10.9472	10.8871	-0.0638211	0.260224	0.741577
NM_207548	chr7	23753911	23754852	+	940	1	Vmn1r174|V1rd22|-|7|7 A3|protein-coding	0	0	0	0	0	NA	1	1
NM_178218	chr11	58954685	58955192	+	505	1	Hist3h2a|-|-|11|11 B1.3|protein-coding	11.4528	11.4501	11.5041	11.475	11.4761	0.0458641	0.337466	0.806783
NM_173740	chrX	16619698	16687812	+	4144	1	Maoa|1110061B18Rik|AA407771|-|X A1.2|X 11.78 cM|protein-coding	11.7737	11.8159	11.8067	11.8093	11.7665	-0.00236934	0.959299	0.992083
NR_037153	chr15	89426349	89429927	-	1912	1	Chkb|Chetk|Chkl|Ck|Ck/Ek|Ck/Ek-beta|Ckb|Ckekb|Ek|-|15|15 E3|protein-coding	9.61754	9.62259	9.60641	9.55751	9.58524	-0.0752739	0.35494	0.816669
NM_001160012	chr4	127325235	127330836	-	1868	1	Gjb3|Cnx31|Cx31|D4Wsu144e|Gjb-3|-|4 D2.2|4 61.48 cM|protein-coding	10.5745	10.608	10.6366	10.6372	10.7113	0.111184	0.0856535	0.423042
NM_198831	chr7	100549117	100583130	-	937	1	Mrpl48|1810030E20Rik|2610028L11Rik|CGI-118|D4Ertd786e|-|7|7 E2|protein-coding	10.2511	10.2899	10.2816	10.3351	10.3106	0.0646332	0.339417	0.807609
NM_026500	chr1	136415271	136440220	+	2218	1	Ddx59|1210002B07Rik|4833411G06Rik|-|1|1 E4|protein-coding	9.55991	9.62975	9.60661	9.61298	9.6206	0.0341457	0.680946	0.951583
NR_026924	chr1	91404879	91406029	-	544	1	1700020N18Rik|-|-|1|1 D|ncRNA	0	0	0	0	0	NA	1	1
NM_001161629	chr15	83866712	83919373	-	2378	1	Efcab6|4931407K02Rik|4932408N08Rik|bM150J22.2|mKIAA1672|-|15|15 E1-E2|protein-coding	0	0	0	0	0	NA	1	1
NM_001081166	chr15	84785376	84856129	-	3712	1	Phf21b|A730032D07Rik|-|15|15 E2|protein-coding	8.572	8.49316	8.52334	8.47728	8.52586	-0.0700656	0.564907	0.929787
NM_001285793	chr16	38742259	38769054	+	2372	1	B4galt4|9130402O08Rik|B4galt-IV|b4Gal-T4|beta4Gal-T4|beta4GalT-IV|-|16|16 B4|protein-coding	0	0	0	0	0	NA	1	1
NM_001042501	chr5	3543833	3570546	+	2289	1	Fam133b|2900022K02Rik|5830415L20Rik|-|5 A1|5|protein-coding	10.2986	10.3413	10.3092	10.2846	10.3126	-0.0316874	0.631061	0.943384
NM_001037907	chr9	87015537	87019916	+	496	1	Ripply2|C030002E08Rik|Gm1122|-|9|9 E3.1|protein-coding	0	0	0	0	0	NA	1	1
NR_036572	chr4	132219893	132220589	-	696	1	Rps15a-ps4|Gm13253|Lethe|OTTMUSG00000011114|-|4|4 D2.3|pseudo	2.988	2.96952	2.97058	2.98342	2.97098	-0.322913	0.686139	0.951906
NM_019453	chr16	3707215	3718124	-	3114	1	Mefv|FMF|TRIM20|pyrin|-|16 A1|16 2.18 cM|protein-coding	0	0	0	0	0	NA	1	1
NM_001045514	chr4	63367123	63403445	-	5456	1	Akna|AI597013|-|4|4 B3-C1|protein-coding	6.81189	6.85016	6.8915	6.85895	6.86797	0.300403	0.152823	0.588307
NR_045448	chrX	8892353	8894964	+	2611	1	B630019K06Rik|AI843180|-|X|X A1.1|pseudo	8.62574	8.73343	8.66658	8.61464	8.68128	-0.0769063	0.529106	0.914827
NM_001243166	chr4	88797237	88798204	+	965	2	Gm13279|OTTMUSG00000011273|-|4 C4|4|protein-coding	-0.236831	-0.23703	-0.234967	-0.233783	-0.234071	2.4375	0.31617	1
NR_040405	chr3	143670892	143712143	-	918	1	Gm6260|EG621809|-|3|3 H1|ncRNA	0	0	0	0	0	NA	1	1
NM_207566	chr2	88274109	88275047	-	937	1	Olfr1173|-|-|2|2 D|protein-coding	0	0	0	0	0	NA	1	1
NM_009991	chr15	74851010	74856318	-	1614	1	Cyp11b2|Cpn2|Cyp11b|Cyp11b-2|-|15 D3|15 34.29 cM|protein-coding	0	0	0	0	0	NA	1	1
NM_001252563	chr2	164389393	164405160	-	2230	1	Matn4|matrilin-4|-|2 H3|2 85.16 cM|protein-coding	0.36047	0.360179	0.360096	0.36664	0.366097	3.02678	0.197669	1
NM_025790	chr13	24817955	24831489	-	681	1	Acot13|0610006O17Rik|Them2|-|13|13 A3.1|protein-coding	9.20398	9.17588	9.15684	9.1766	9.19979	-0.0258615	0.781185	0.972001
NR_038007	chr1	188006576	188008990	-	2209	1	9330162B11Rik|-|-|1|1 H5|ncRNA	0	0	0	0	0	NA	1	1
NM_001346670	chr11	76416792	76494495	-	4861	1	Abr|-|-|11 B5|11 45.92 cM|protein-coding	12.0687	12.1258	12.0386	12.0475	12.0387	-0.0735709	0.087773	0.43038
NR_045314	chr19	8651796	8663335	-	2742	1	9830166K06Rik|-|-|19|19 A|ncRNA	0	0	0	0	0	NA	1	1
NM_001271777	chr2	25498650	25501719	-	814	1	C8g|-|-|2 A3|2 17.31 cM|protein-coding	5.2021	5.18238	5.18225	5.19118	5.20101	-0.0113588	0.974738	0.994657
NM_080464	chr6	14713822	14755274	-	7114	1	Ppp1r3a|GM|RG1|RGL|-|6|6 A1|protein-coding	0	0	0	0	0	NA	1	1
NM_008808	chr5	138976972	138994953	-	1010	1	Pdgfa|-|-|5 G2|5 77.65 cM|protein-coding	11.4919	11.4731	11.2434	11.1666	11.2464	-0.366014	1.33449e-11	4.66633e-10
NM_198616	chr19	5453163	5457563	-	4398	1	Ccdc85b|AI842788|BB115872|-|19|19 A|protein-coding	11.4805	11.4003	10.9493	10.9587	11.048	-0.640339	8.62839e-25	5.77185e-23
NM_001166758	chr7	22842688	22843605	-	916	1	Vmn1r159|ENSMUSG00000074298|Gm16507|-|7|7 A3|protein-coding	0	0	0	0	0	NA	1	1
NR_045443	chrX	62510539	62516069	-	591	1	1700019B21Rik|-|-|X|X A6|ncRNA	9.40778	9.43476	9.42197	9.45247	9.44851	0.0416915	0.626256	0.943138
NR_030276	chr7	3219482	3219560	+	78	1	Mir291b|Mirn291b|mir-291b|mmu-mir-291b|-|7 A1|7|ncRNA	0	0	0	0	0	NA	1	1
NM_144783	chr2	105126529	105173614	+	3080	1	Wt1|D630046I19Rik|Wt-1|-|2 E2-E3|2 55.06 cM|protein-coding	2.51938	2.51802	2.5304	2.5493	2.5308	5.20814	0.00164356	0.0193688
NM_030719	chr5	134099748	134141758	+	4734	1	Gatsl2|7530428J21Rik|AW742413|Gats|Gatsl1|-|5|5 G2|protein-coding	-1.30846	-1.30698	-1.30883	-1.30905	-1.3075	-1.12278	0.747659	1
NM_178738	chr9	86743633	86757506	+	2519	1	Prss35|6030424L22Rik|P3D9|-|9|9 E3.1|protein-coding	0.755801	0.754316	0.753885	0.748932	0.752342	-1.26408	0.43569	1
NM_177345	chr2	34406851	34624958	+	3438	1	Mapkap1|AI591529|D230039K05Rik|Sin1|-|2|2 B|protein-coding	11.5772	11.5808	11.5821	11.6073	11.5752	0.0125662	0.787345	0.972001
NM_001190325	chr16	16860671	16863985	-	865	1	Igll1|BB139905|Igl-5|Igll|Lambda5|-|16 A3|16 10.45 cM|protein-coding	-1.86719	-1.86617	-1.86745	-1.86762	-1.86768	-2.07879	0.647706	1
NM_173754	chr11	67854523	67922153	-	4445	1	Usp43|-|-|11|11 B3|protein-coding	4.38577	4.37726	4.36885	4.37454	4.38339	-0.195083	0.675799	0.950895
NM_134241	chr13	22883088	22884161	-	1072	1	Vmn1r212|V1rh18|-|13|13 A3.1|protein-coding	0	0	0	0	0	NA	1	1
NM_025449	chr9	108290457	108296496	+	2095	1	Nicn1|1500032A17Rik|-|9|9 F1|protein-coding	8.92708	8.86755	8.85586	8.8757	8.89032	-0.0577589	0.578602	0.933386
NM_001195338	chr19	53929659	53944627	-	2500	1	Bbip1|2310002J21Rik|2610002B11Rik|4930560M04Rik|Ncrna00081|-|19|19 D2|protein-coding	10.4595	10.4992	10.4333	10.4962	10.5254	0.0101757	0.880961	0.984584
NM_001013833	chr19	30564487	31765033	-	6958	1	Prkg1|AW125416|CGKI|Gm19690|Prkg1b|Prkgr1b|-|19|19 C1|protein-coding	-1.26938	-1.26967	-1.26802	-1.26831	-1.26998	1.25621	0.719277	1
NM_146552	chr10	129801564	129802523	-	958	1	Olfr811|MOR110-6|-|10|10 D3|protein-coding	0	0	0	0	0	NA	1	1
NM_010786	chr10	117688875	117710758	-	3085	1	Mdm2|1700007J15Rik|AA415488|Mdm-2|-|10 D2|10 66.32 cM|protein-coding	12.0477	12.0306	11.8778	11.8022	11.8273	-0.26552	1.11918e-08	3.05668e-07
NM_011120	chr13	27708998	27716737	-	989	1	Prl7d1|Ghd19|PLF-RP|PRP|Plfr|-|13|13 A3.1|protein-coding	-1.35819	-1.35843	-1.3585	-1.3587	-1.35608	0.983711	0.818998	1
NM_001167592	chr9	35645113	35648202	-	1324	1	Pate3|Gm17365|Pate-dj|-|9 A4|9 20.37 cM|protein-coding	0.0857582	0.0873958	0.0847237	0.0822018	0.0838906	-1.80445	0.370765	1
NM_008885	chr11	63131457	63159547	+	1848	1	Pmp22|22kDa|Gas-3|HNPP|Tr|trembler|-|11 B3|11 38.99 cM|protein-coding	11.7581	11.6745	11.7702	11.8329	11.8586	0.140999	0.00843451	0.0762852
NM_029367	chr11	80858389	80867814	+	807	1	Spaca3|1700025M08Rik|ALLP17|Lyc3|SLLP1|mSLLP1|-|11|11 B5|protein-coding	0	0	0	0	0	NA	1	1
NM_173372	chr11	50850685	50866208	+	4319	1	Grm6|BC021919|Gm3|Gprc1f|mGluR6|nerg1|nob2|nob3|nob4|-|11|11 B1.3|protein-coding	0	0	0	0	0	NA	1	1
NM_001166759	chr7	20668918	20669841	+	922	5	Vmn1r107|100043561|Gm4519|Gm9609|Vmn1r110|-|7 A3|7|protein-coding	0	0	0	0	0	NA	1	1
NM_178640	chr13	13954674	13999068	+	3667	1	B3galnt2|A930105D20Rik|C80633|D230016N13Rik|-|13|13 A1|protein-coding	11.3509	11.3318	12.3348	12.3569	12.3648	1.3451	6.72314e-198	2.51609e-195
NM_013774	chr12	105202422	105206993	+	1025	1	Tcl1b4|AA675342|-|12|12 E|protein-coding	0	0	0	0	0	NA	1	1
NM_010014	chr4	104367538	104680389	+	1184	1	Dab1|AI956902|C630028C02Rik|scm|scr|scrambler|yot|-|4 C6|4 47.79 cM|protein-coding	0	0	0	0	0	NA	1	1
NM_009200	chr10	78780496	78814825	+	2077	1	Slc1a6|EAAT4|-|10 C1|10 39.72 cM|protein-coding	0	0	0	0	0	NA	1	1
NM_153457	chr12	72211749	72409054	-	3621	1	Rtn1|Nsp|-|12|12 C3|protein-coding	0	0	0	0	0	NA	1	1
NM_009229	chr8	106935750	107014192	+	4414	1	Sntb2|Snt2|-|8 D3|8 53.38 cM|protein-coding	10.594	10.556	10.4955	10.4727	10.5174	-0.125632	0.0444517	0.273444
NM_024465	chr2	150832515	150904731	-	1952	1	Abhd12|1500011G07Rik|6330583M11Rik|AI431047|AW547313|-|2|2 G3|protein-coding	11.4178	11.4784	11.5009	11.4778	11.5138	0.0659764	0.189363	0.654085
NM_025677	chr1	152370736	152386682	-	1125	1	Tsen15|5730449L18Rik|AL023077|Sen15|-|1|1 G2|protein-coding	10.8911	10.9427	10.9402	10.9211	10.9375	0.0216301	0.69909	0.955796
NM_144789	chr16	97791467	97851227	-	6320	1	Prdm15|C21orf83|E130018M06Rik|ORF62|Zfp298|-|16|16 C4|protein-coding	9.40292	9.38508	9.31253	9.31124	9.25048	-0.223212	0.0133743	0.111207
NM_010450	chr6	52242105	52245810	-	2284	1	Hoxa11|Hox-1.9|Hoxa-11|-|6 B3|6 25.4 cM|protein-coding	-1.86719	-1.86734	-1.86738	-1.86663	-1.86755	0.260813	0.95441	1
NR_073429	chr3	51276761	51278407	+	1646	1	4930577N17Rik|-|-|3|3 C|ncRNA	7.13742	7.11252	7.16325	7.06511	7.11711	-0.0560479	0.784978	0.972001
NM_020051	chr7	109727465	109731732	-	702	1	Ascl3|Sgn1|bHLHa42|-|7 E3|7 57.46 cM|protein-coding	-1.86719	-1.86734	-1.86738	-1.86663	-1.86755	0.260813	0.95441	1
NR_105811	chr14	11282477	11282561	+	84	1	Mir5124b|Gm27681|mmu-mir-5124b|-|14|14 A1|ncRNA	0	0	0	0	0	NA	1	1
NM_025834	chr8	13060908	13075006	+	2388	1	Proz|1300015B06Rik|-|8|8 A1.1|protein-coding	4.24105	4.23861	4.23466	4.24346	4.21883	-0.274692	0.584896	0.933456
NM_183391	chr1	161494657	161505290	+	2059	1	Tnfsf18|Gitrl|Tnlg2a|-|1 H2.1|1 69.75 cM|protein-coding	-0.421236	-0.421461	-0.417172	-0.418104	-0.4217	2.25838	0.411767	1
NM_001166708	chr7	21011532	21012455	-	922	1	Vmn1r119|Gm1447|-|7|7 A3|protein-coding	0	0	0	0	0	NA	1	1
NR_106083	chr2	67675457	67675516	+	59	1	Mir7224|Gm27971|mmu-mir-7224|-|2|2 C1.3|ncRNA	-1.86719	-1.86733	-1.86737	-1.86748	-1.86672	0.260813	0.95441	1
NM_001164564	chr2	26586630	26592682	+	1153	1	Egfl7|VE-statin|Zneu1|-|2|2 A3|protein-coding	3.57359	3.57408	3.58049	3.57444	3.57354	0.136662	0.824848	0.974996
NM_178923	chr16	90228951	90284503	-	4426	1	Scaf4|AA517739|Sfrs15|Sra4|Srsf15|-|16|16 C3.3|protein-coding	9.70132	9.59225	9.58431	9.70559	9.62588	-0.0137384	0.887015	0.984857
NM_177784	chr2	69822370	69836651	+	4611	1	Klhl23|C130068N17Rik|-|2|2 C2|protein-coding	-1.86719	-1.86737	-1.86631	-1.86759	-1.86764	0.260813	0.95441	1
NM_001039545	chr11	67171027	67197517	+	6041	1	Myh2|MHC2A|MyHC-IIa|Myh2a|Myhs-f|Myhs-f1|Myhsf1|-|11 B3|11 40.59 cM|protein-coding	-1.23233	-1.23494	-1.2328	-1.2353	-1.23533	-1.29951	0.677567	1
NM_001310021	chr5	11183015	11187810	+	1146	1	Gm5861|EG545728|-|5|5 A1|protein-coding	0	0	0	0	0	NA	1	1
NM_001146201	chr12	32173397	32208338	-	6677	1	Pik3cg|5830428L06Rik|PI3Kgamma|p110gamma|-|12|12 A3|protein-coding	-1.35819	-1.35843	-1.3585	-1.3587	-1.35608	0.983711	0.818998	1
NM_013542	chr14	56258836	56262334	-	1505	1	Gzmb|AI553453|CCP-1/C11|CCP1|Ctla-1|Ctla1|GZB|-|14 C3|14 28.19 cM|protein-coding	0	0	0	0	0	NA	1	1
NM_146175	chr6	47877555	47908484	+	5211	1	Zfp282|AI449432|C81429|E430019K09Rik|HUB1|-|6|6 B2.3|protein-coding	9.46316	9.55246	9.58972	9.62333	9.5752	0.1775	0.045785	0.279165
NM_018858	chr5	117282651	117287564	-	1176	1	Pebp1|HCNP|Pbp|Pbp1|Pbpr|Rkip|-|5 F|5 56.88 cM|protein-coding	12.9946	13.0565	13.0911	13.04	13.0802	0.0530893	0.182202	0.644686
NM_026718	chr5	114775140	114805820	+	3235	1	Ankrd13a|1100001D10Rik|ANKRD13|AU046136|-|5|5 F|protein-coding	11.5218	11.5486	11.5414	11.5318	11.5607	0.0122494	0.795621	0.973682
NM_026818	chr8	69880366	69887392	-	4012	1	Cilp2|1110031K21Rik|AA407300|CLIP-2|-|8|8 B3.3|protein-coding	2.23983	2.2313	2.2305	2.23568	2.2328	-0.359159	0.711199	0.960944
NM_001004151	chr16	23429133	23433960	+	3116	1	Rtp1|Gm1766|Gm604|-|16|16 B1|protein-coding	0	0	0	0	0	NA	1	1
NM_153680	chr5	31193304	31198900	+	1924	1	Snx17|5830447M19Rik|AI790646|D5Ertd260e|b2b1625.1Clo|mKIAA0064|-|5|5 B1|protein-coding	10.9039	10.9138	10.8714	10.8787	10.9593	-0.00666906	0.913024	0.988977
NM_025898	chr7	16098643	16117975	+	2319	1	Napa|1500039N14Rik|AW209189|RA81|SNAPA|SNARE|a-SNAP|hyh|-|7 A2|7 8.74 cM|protein-coding	12.1199	12.0815	12.1486	12.1297	12.1264	0.0444816	0.288458	0.768474
NR_038181	chr8	68368459	68375710	+	640	1	1700125H03Rik|4930510D22Rik|-|8|8 B3.3|ncRNA	3.72793	3.71673	3.71651	3.72214	3.71912	-0.157553	0.786765	0.972001
NM_019701	chr4	141404357	141415988	-	2318	1	Clcnkb|CLCKB|Clc-Ka|Clck2|Clcnk1l|-|4|4 D3|protein-coding	1.07668	1.07335	1.07753	1.07811	1.08253	2.08015	0.259641	1
NM_199222	chr9	57607033	57620774	-	1722	1	Lman1l|BC020188|slamp|-|9|9 B|protein-coding	5.75678	5.69526	5.6942	5.68425	5.68901	-0.50986	0.103091	0.474254
NM_025744	chr2	70508819	70540884	+	1734	1	Erich2|4933404M02Rik|-|2|2 C2|protein-coding	-1.86719	-1.86733	-1.86737	-1.86748	-1.86672	0.260813	0.95441	1
NM_026050	chr5	143548706	143564525	+	2326	1	Fam220a|1500026F15Rik|2810453I06Rik|AW047776|Acpin1|Sipar|-|5|5 G2|protein-coding	10.4558	10.3879	10.5979	10.6114	10.6295	0.30988	1.22817e-06	2.60039e-05
NM_007725	chr10	79988600	79995400	+	1773	1	Cnn2|AA408047|AI324678|Calpo2|-|10|10 C1|protein-coding	13.8982	13.8696	13.7802	13.7571	13.7873	-0.12813	7.68911e-05	0.00124528
NM_146331	chr9	39461433	39462377	+	943	1	Olfr954|MOR171-42|MOR171-53|-|9|9 A5.1|protein-coding	0	0	0	0	0	NA	1	1
NR_040485	chr16	95831123	95898713	-	1850	1	1600002D24Rik|-|-|16|16 C4|ncRNA	-1.86719	-1.86617	-1.86745	-1.86762	-1.86768	-2.07879	0.647706	1
NM_010500	chr1	155096367	155099636	-	3267	1	Ier5|-|-|1 G3|1 66.45 cM|protein-coding	11.7095	11.6141	11.0068	10.9212	11.004	-0.949343	6.53899e-56	8.2314e-54
NM_028841	chr13	54789405	54796775	+	1546	1	Tspan17|2210021G21Rik|AI047581|Fbxo23|Tm4sf17|-|13|13 B1|protein-coding	11.1028	11.1253	11.1339	11.1181	11.1579	0.0321889	0.542287	0.921269
NM_026419	chr4	137421008	137430520	-	887	1	Cela3b|0910001F22Rik|2310074F01Rik|AI504000|Ela3|Ela3b|-|4 D3|4 69.9 cM|protein-coding	0	0	0	0	0	NA	1	1
NM_025891	chr5	24592622	24602002	-	1710	1	Smarcd3|1500001J14Rik|2210409C08Rik|BAF60C|-|5|5 A3|protein-coding	9.78305	9.78824	9.90803	9.86503	9.89143	0.193586	0.010961	0.0942718
NM_133924	chr2	164786021	164792770	+	1515	1	Snx21|5730407K14Rik|AI481716|-|2|2 H3|protein-coding	9.79011	9.82498	9.78606	9.76005	9.79785	-0.0513201	0.504483	0.89893
NM_001039472	chr1	136131401	136178014	+	9082	1	Kif21b|2610511N21Rik|mKIAA0449|-|1 E4|1 59.61 cM|protein-coding	11.1707	11.1374	10.8577	10.8719	10.8083	-0.449468	1.84995e-15	8.0051e-14
NM_001079929	chr17	25162461	25171913	+	2388	1	Ccdc154|Ccdc157|Gm317|-|17|17 A3.3|protein-coding	2.96724	2.96843	2.98018	2.97435	2.97419	0.831617	0.302581	0.778298
NR_045641	chr3	59146296	59153628	-	7332	1	F630111L10Rik|-|-|3|3 D|ncRNA	-0.721963	-0.724941	-0.722639	-0.725127	-0.723362	-0.343729	0.898411	1
NM_001276400	chr2	151645404	151668533	-	1645	1	Rad21l|Gm14160|MeiRAD21L|Rad21l1|-|2 G3|2|protein-coding	0	0	0	0	0	NA	1	1
NM_133887	chr4	132854064	132884458	-	2309	1	Stx12|AI850350|AU041521|Stx13|-|4 D2.3|4 66.01 cM|protein-coding	11.0397	11.1003	11.0124	11.025	11.0407	-0.0657146	0.231629	0.707249
NM_026689	chr4	138434672	138442265	+	3726	1	Mul1|0610009K11Rik|AV000801|Gide|-|4|4 D3|protein-coding	9.38837	9.32818	9.38525	9.38796	9.38639	0.0632332	0.473605	0.883243
NM_146770	chr2	87107447	87108385	-	937	1	Olfr259|MOR172-3|-|2|2 D|protein-coding	0	0	0	0	0	NA	1	1
NM_001037248	chr7	20724512	20730624	-	1589	2	Gm4567|EG381936|Gm5156|-|7 A3|7|protein-coding	0	0	0	0	0	NA	1	1
NM_028197	chr10	62558470	62578457	-	2463	1	Kif1bp|0710007C18Rik|2510003E04Rik|KBP|mKIAA1279|-|10|10 B4|protein-coding	10.0358	10.0469	10.0232	9.99753	10.0157	-0.0530094	0.452138	0.875044
NM_008702	chr11	78567168	78697425	-	4483	1	Nlk|AI194375|-|11|11 B5|protein-coding	10.7109	10.7228	10.592	10.6811	10.6049	-0.139586	0.0298736	0.205646
NM_177811	chr13	67405713	67421418	-	3324	1	Zfp459|9930025G17Rik|Rslcan-14|-|13 B3|13 34.54 cM|protein-coding	3.03041	3.02298	3.02605	3.03066	3.03035	0.211071	0.779551	0.972001
NR_046043	chr7	96339483	96341964	-	1093	1	Gm15412|OTTMUSG00000021245|-|7|7 E1|ncRNA	-1.29322	-1.29347	-1.29354	-1.29077	-1.29375	1.08189	0.794161	1
NM_001168334	chrX	32560055	32562004	+	1946.5	2	Btbd35f2|Gm2799|-|X A3.1|X|protein-coding	0	0	0	0	0	NA	1	1
NR_045358	chr10	97035768	97061059	+	1010	1	4930556N09Rik|-|-|10|10 C3|ncRNA	0	0	0	0	0	NA	1	1
NM_001104637	chr6	123609758	123650635	-	2555	1	Vmn2r22|EG546913|-|6|6 F2|protein-coding	0.45751	0.456643	0.458629	0.45571	0.457209	0.0524508	0.976397	1
NR_029851	chrX	7241983	7242046	-	63	1	Mir362|Mirn362|mir-362|mmu-mir-362|-|X|X A1.1|ncRNA	0	0	0	0	0	NA	1	1
NM_011902	chr4	126322121	126325199	-	1482	1	Tekt2|AU014974|tektin-t|-|4|4 D2.2|protein-coding	3.37794	3.36534	3.38591	3.38765	3.38156	1.0597	0.1492	0.582293
NR_029531	chr13	63300712	63300784	+	72	1	Mir27b|Mirn27b|mmu-mir-27b|-|13|13 B3|ncRNA	1.26347	1.25649	1.25842	1.25897	1.25844	-0.373029	0.78131	1
NM_007772	chr13	42052021	42185026	+	8742	1	Hivep1|Cryabp1|-|13 A4|13 20.72 cM|protein-coding	9.83825	9.75261	9.73769	9.83546	9.70572	-0.0657889	0.477535	0.885722
NM_001195128	chr5	138820080	138821619	+	647	1	Gm5294|EG384244|-|5|5 G2|protein-coding	0	0	0	0	0	NA	1	1
NM_134222	chr13	23136485	23137381	+	895	1	Vmn1r218|V1ri5|-|13|13 A3.1|protein-coding	0	0	0	0	0	NA	1	1
NR_046460	chr14	46602806	46637423	-	1921	1	4933425B07Rik|-|-|14|14 C1|ncRNA	0.823978	0.825848	0.827727	0.831859	0.826266	1.90296	0.32469	1
NM_146418	chr9	37992492	37993439	+	946	1	Olfr881|MOR162-7|-|9|9 A4|protein-coding	0	0	0	0	0	NA	1	1
NM_001081329	chr7	123478639	123500449	-	4567	1	Zkscan2|9430065N20Rik|AW493225|Zfp694|-|7|7 F3|protein-coding	0	0	0	0	0	NA	1	1
NM_026412	chr2	118814003	118836212	+	3107	1	Knstrn|1700025D04Rik|C15orf23|D2Ertd750e|SKAP|Traf4af1|-|2|2 E5|protein-coding	12.799	12.8017	12.8438	12.8214	12.85	0.0466555	0.196642	0.663152
NM_033594	chr18	37755773	37841872	+	4707	1	Pcdhga11|-|-|18|18 B3|protein-coding	11.1291	11.0378	11.0074	11.0518	11.1235	-0.0298473	0.648143	0.945439
NM_181683	chr8	18986233	18991055	-	348	1	Defb37|BD-37|-|8|8 A1.3|protein-coding	-1.86561	-1.86744	-1.86751	-1.86774	-1.86781	-2.30448	0.573731	1
NM_147114	chr7	102954664	102955620	-	955	1	Olfr575|MOR8-1|-|7|7 E3|protein-coding	0	0	0	0	0	NA	1	1
NM_028402	chr13	67779693	67789080	+	3266	1	Zfp493|2900054J07Rik|Rslcan12|-|13|13 B3|protein-coding	5.63543	5.62733	5.62838	5.6334	5.61816	-0.0701709	0.816328	0.973806
NM_028123	chr6	39334771	39377707	-	4047	1	Slc37a3|2610507O21Rik|AU044904|-|6|6 B1|protein-coding	9.22107	9.21599	9.21226	9.22251	9.22405	0.00307782	0.972787	0.994494
NM_001004192	chr9	108436482	108446083	+	682	1	BC048562|-|-|9|9 F2|protein-coding	0	0	0	0	0	NA	1	1
NM_009351	chr14	50824061	50870554	-	8106	1	Tep1|Tp1|-|14 C1|14 26.26 cM|protein-coding	10.4369	10.4525	10.319	10.4261	10.2845	-0.164158	0.0329683	0.221975
NR_037263	chr2	10476342	10476423	+	81.9	8	Mir467a-8|Gm22705|Mirn467a-8|mmu-mir-467a-8|-|2 A1|2|ncRNA	1.35466	1.34766	1.34957	1.35009	1.35127	-0.2149	0.870233	1
NM_001256184	chr5	67941669	67977070	+	537	1	Gm5108|EG330097|-|5|5 C3.1|protein-coding	-0.800278	-0.798374	-0.800679	-0.797322	-0.800816	-0.293255	0.924429	1
NM_008734	chr14	38368951	39473088	-	4000	1	Nrg3|ska|-|14|14 B|protein-coding	-1.26938	-1.26967	-1.26802	-1.26831	-1.26998	1.25621	0.719277	1
NM_026303	chr9	3335231	3385846	+	2255	1	Alkbh8|4930562C03Rik|8030431D03Rik|9430088N01Rik|Abh8|-|9|9 A1|protein-coding	8.90574	8.96846	8.99534	9.02553	9.00112	0.17388	0.0892208	0.43446
NM_009027	chr13	91880407	91988042	-	5827	1	Rasgrf2|6330417G04Rik|AW048350|Grf2|Ras-GRF2|-|13 C3|13 47.43 cM|protein-coding	-0.822915	-0.825799	-0.825849	-0.82405	-0.824219	-0.480374	0.861153	1
NM_001103199	chr4	112804616	113286973	-	3773	1	Skint6|OTTMUSG00000008519|-|4|4 D1|protein-coding	0	0	0	0	0	NA	1	1
NM_021409	chr2	168081004	168101203	+	3394	1	Pard6b|AV025615|Par6b|-|2|2 H3|protein-coding	8.7035	8.71124	8.81949	8.82044	8.79343	0.28546	0.00757109	0.070125
NM_007422	chr1	177763178	177796509	-	2538	1	Adss|AI314886|AS|Adss2|-|1|1 H4|protein-coding	13.2649	13.2978	13.2643	13.2543	13.2567	-0.0283014	0.402835	0.848035
NR_121588	chr14	13157388	13284638	-	1917	1	Gm5087|C630025C03|EG328354|-|14 A1|14|ncRNA	0	0	0	0	0	NA	1	1
NM_181070	chr18	6765167	6791606	+	3661	1	Rab18|AA959686|-|18 A1|18 4.53 cM|protein-coding	11.1741	11.2466	11.1363	11.1658	11.2376	-0.0435322	0.472406	0.882498
NM_001166756	chr7	21843344	21844267	-	922	2	Gm8720|EG667599|Vmn1r164|-|7|7 A3|protein-coding	0	0	0	0	0	NA	1	1
NM_027420	chr7	79925359	79935264	-	2176	1	Arpin|2610034B18Rik|-|7|7 D2|protein-coding	10.8389	10.9196	10.9241	10.8647	10.94	0.0429183	0.493037	0.893524
NM_146739	chr7	108523004	108523948	-	943	1	Olfr502|MOR204-8|-|7|7 E3|protein-coding	0	0	0	0	0	NA	1	1
NM_175016	chr5	114123934	114128176	-	1059	1	Alkbh2|9530023G02|AU016977|Abh2|mABH2|-|5|5 F|protein-coding	6.38889	6.33811	6.34806	6.38295	6.3063	-0.165192	0.54342	0.921564
NM_031192	chr1	133350674	133360319	+	1411	1	Ren1|D19352|Ren|Ren-1|Ren-A|Ren1c|Ren1d|Rn-1|Rnr|-|1 E4|1 57.91 cM|protein-coding	0	0	0	0	0	NA	1	1
NM_001201395	chrX	76582610	76602924	-	999	1	Cldn34d|4930468A15Rik|-|X|X A7.3|protein-coding	0	0	0	0	0	NA	1	1
NM_013822	chr2	137081451	137116520	-	5465	1	Jag1|ABE2|Gsfabe2|Htu|Ozz|Ser-1|-|2 F3|2 67.73 cM|protein-coding	9.51566	9.55367	9.72802	9.71893	9.70995	0.370851	5.77849e-06	0.000111441
NM_145705	chr14	55679080	55681817	-	1728	1	Tinf2|AW552114|D14Wsu146e|Tin2|-|14 C3|14 28.19 cM|protein-coding	10.246	10.2311	10.2579	10.2316	10.1891	-0.0213479	0.758012	0.968088
NM_001011815	chr7	140466203	140467165	+	961	1	Olfr533|MOR252-3P|-|7|7 F4|protein-coding	0	0	0	0	0	NA	1	1
NM_011785	chr1	177022115	177248767	-	4720	1	Akt3|AI851531|D930002M15Rik|Nmf350|-|1|1 H4|protein-coding	11.7362	11.6864	11.6431	11.6694	11.6757	-0.0634711	0.177309	0.635018
NR_029786	chr14	115044000	115044081	+	81	1	Mir19a|Mirn19a|mir-19a|mmu-mir-19a|-|14|14 E4|ncRNA	2.69041	2.69381	2.69231	2.69004	2.68695	-0.250755	0.759851	0.968508
NM_177755	chr15	58314573	58324169	-	2206	1	Klhl38|8230402K04Rik|-|15|15 D1|protein-coding	-1.32544	-1.32568	-1.32576	-1.3245	-1.32462	1.03725	0.781125	1
NM_145379	chr7	145300909	145309557	+	2001	1	Mrgprf|BC019711|Mgrc|MrgF|-|7|7 F5|protein-coding	8.13885	8.0569	8.07945	8.08959	8.07371	-0.0611215	0.658436	0.947523
NM_001285826	chr1	58430993	58445486	-	1412	1	Ppil3|2310076N22Rik|2510026K04Rik|Cyp10l|-|1|1 C1.3|protein-coding	10.5031	10.4815	10.4533	10.4614	10.5043	-0.0292725	0.645386	0.944779
NR_045801	chr3	153789305	153792087	-	1831	1	5730460C07Rik|-|-|3|3 H3|ncRNA	-1.86719	-1.86617	-1.86745	-1.86762	-1.86768	-2.07879	0.647706	1
NR_046065	chr2	60411525	60412574	+	558	1	Gm13580|OTTMUSG00000012842|-|2|2 C1.1|ncRNA	0	0	0	0	0	NA	1	1
NM_001081396	chr15	57912199	57970068	+	3295	1	Tbc1d31|4B3|D330013L20Rik|Gm85|Wdr67|-|15|15 D1|protein-coding	10.404	10.4109	10.2733	10.2355	10.296	-0.23058	0.000499192	0.00679674
NM_022015	chr17	47488050	47502287	-	2768	1	Taf8|AW260255|Tbn|-|17|17 C|protein-coding	9.38672	9.42288	9.57456	9.5434	9.57887	0.338395	8.51209e-05	0.00136105
NM_198865	chr14	111675115	111683135	+	4803	1	Slitrk5|2610019D03Rik|-|14|14 E4|protein-coding	0	0	0	0	0	NA	1	1
NM_027382	chrX	102284638	102505158	-	1723	1	Hdac8|2610007D20Rik|-|X|X D|protein-coding	8.04576	8.01947	8.08521	8.03783	8.03969	0.081678	0.552047	0.924602
NM_001104570	chr17	20462373	20481236	-	2561	1	Vmn2r108|EG627805|-|17|17 A3.2|protein-coding	0	0	0	0	0	NA	1	1
NM_001081327	chr7	121392296	121501768	+	2266	1	Hs3st2|6430516N12Rik|A830061E14Rik|AW491345|-|7 F2|7 65.07 cM|protein-coding	0	0	0	0	0	NA	1	1
NM_019765	chr5	123577794	123684361	-	5851	1	Clip1|1110007I12Rik|4631429H07Rik|AV017631|C81039|CLIP-170|CLIP170|CYLN1|Clip50|Rsn|mKIAA4046|restin|-|5|5 F|protein-coding	11.9518	11.9321	11.9124	11.9338	11.9223	-0.0242288	0.5704	0.931406
NM_009873	chr5	3343893	3531005	+	11512	1	Cdk6|AI504062|Crk2|-|5 A1|5 2.04 cM|protein-coding	11.8723	11.7372	11.8407	11.9437	11.8583	0.101088	0.0961404	0.453501
NR_030421	chr12	109712810	109712890	+	80	1	Mir758|Mirn758|mir-758|mmu-mir-758|-|12 F1|12|ncRNA	0	0	0	0	0	NA	1	1
NM_010000	chr7	26173409	26210660	+	1866	1	Cyp2b9|Cyp2b|-|7 A3|7 14.11 cM|protein-coding	0	0	0	0	0	NA	1	1
NR_040542	chr3	85317519	85332027	+	536	1	1700036G14Rik|-|-|3|3 F1|ncRNA	0	0	0	0	0	NA	1	1
NR_040385	chr3	41487681	41493199	-	2166	1	Platr4|C430002E04Rik|-|3|3 B|ncRNA	2.00915	1.99949	2.01469	2.01111	2.00493	1.24145	0.323712	1
NM_030253	chr16	35938470	35972621	+	3551	1	Parp9|ARTD9|AW214463|BC003281|Bagl|Bal|PARP-9|-|16|16 B3|protein-coding	8.7319	8.73284	8.77028	8.73737	8.73056	0.0367359	0.73137	0.962722
NM_025527	chr18	34331145	34336599	+	869	1	Srp19|2310020D23Rik|-|18|18 B1|protein-coding	10.3454	10.3419	10.4054	10.3413	10.3859	0.0560291	0.39936	0.846179
NM_013873	chr15	84076097	84105754	-	2374	1	Sult4a1|2400007A17Rik|AI853543|BR-STL-1|ST4A1|Sultx3|-|15|15 E2|protein-coding	0	0	0	0	0	NA	1	1
NM_001220499	chr4	156127488	156133422	+	4569	1	Rnf223|9930005F22Rik|-|4|4 E2|protein-coding	5.0162	5.00077	5.03354	5.01958	5.01902	0.36553	0.345208	0.81046
NM_020582	chr5	145183706	145191592	-	471	1	Atp5j2|1110019H14Rik|-|5|5 G2|protein-coding	11.7603	11.7978	11.8043	11.7706	11.7578	-0.00361331	0.937748	0.990382
NM_013581	chr11	113649529	113662401	+	3013	1	Cog1|6030445I15|Ldlb|mKIAA1381|-|11|11 E2|protein-coding	11.0168	10.981	10.9943	10.9824	11.0014	-0.00807173	0.881378	0.984584
NM_001039658	chr19	3388857	3398168	+	2030	1	Mtl5|tesmin|-|19|19 A|protein-coding	0.176949	0.181344	0.17878	0.179956	0.17797	-0.162821	0.935157	1
NR_029781	chr18	10785481	10785552	-	71	1	Mir1a-2|Mir1-2|Mirn1-2|mir-1a-2|mmu-mir-1-2|mmu-mir-1a-2|-|18|18 A1|ncRNA	-0.129002	-0.124579	-0.129292	-0.127684	-0.126203	-0.668171	0.770828	1
NM_026231	chr3	132982551	133091740	-	2605	1	Gstcd|4933434L15Rik|-|3|3 G3|protein-coding	10.015	10.0009	9.99873	10.015	10.004	-0.00289987	0.967326	0.993045
NM_053015	chr1	90915100	90951142	+	4466	1	Mlph|2210418F23Rik|5031433I09Rik|AW228792|D1Wsu84e|Slac-2a|l(1)-3Rk|l1Rk3|ln|-|1 D|1 45.73 cM|protein-coding	2.73525	2.72869	2.72982	2.74091	2.73054	0.198441	0.815724	0.973806
NM_029584	chr7	7130678	7136755	-	3019	1	Zfp773|2810409K11Rik|-|7|7 A1|protein-coding	2.68001	2.66172	2.66063	2.66514	2.66024	-0.902547	0.287466	0.768439
NM_146339	chr9	19917229	19922510	+	2666	1	Olfr77|18A|MOR143-1|-|9|9 A3|protein-coding	0	0	0	0	0	NA	1	1
NM_177561	chr5	74000038	74068411	-	3214	1	Usp46|1190009E20Rik|2410018I08Rik|AI451644|-|5|5 C3.3|protein-coding	10.8745	10.9275	10.8977	10.894	10.9362	0.0110244	0.848218	0.97838
NM_001114347	chr9	113741473	113919697	+	6326	1	Clasp2|1500004F14Rik|8030404L10Rik|C77448|CLASP2beta|mKIAA0627|-|9|9 F3|protein-coding	11.557	11.509	11.5541	11.543	11.478	-0.0103301	0.844229	0.977633
NM_001025163	chr7	6363308	6382605	+	4744	1	Zfp78|A330079D15|KRAB12|Zfp77|-|7 A1|7 3.69 cM|protein-coding	7.08682	7.06293	7.06854	7.08037	7.0707	-0.00876937	0.962201	0.992707
NM_144792	chr19	32122727	32388454	-	3595	1	Sgms1|9530058O11Rik|AI841905|C80702|Mob|Sms1|Sor1|Tmem23|-|19|19 C1|protein-coding	11.2557	11.3091	11.3118	11.3291	11.3122	0.0477121	0.350003	0.812982
NM_001002005	chr15	89059726	89070907	+	3407	1	Panx2|-|-|15 E3|15|protein-coding	0	0	0	0	0	NA	1	1
NM_080850	chr1	93309437	93342788	-	5099	1	Pask|mKIAA0135|-|1|1 D|protein-coding	11.1282	11.1789	11.2109	11.1687	11.1408	0.0262241	0.638176	0.943384
NM_145474	chr15	82615965	82620907	-	1611	1	Cyp2d34|-|-|15|15 E1|protein-coding	0	0	0	0	0	NA	1	1
NM_146328	chr17	37492468	37499674	+	1102	1	Olfr110|MOR249-2|-|17|17 B1|protein-coding	0	0	0	0	0	NA	1	1
NM_175446	chrX	134971373	135009209	-	3494	1	Zmat1|A230096A06|AW990744|B930008K04Rik|-|X|X E3|protein-coding	4.7291	4.71911	4.71167	4.70647	4.71954	-0.304132	0.459295	0.879043
NM_198410	chr3	88364589	88368541	+	1660	1	Paqr6|1500001B10Rik|-|3|3 F1|protein-coding	1.67754	1.67757	1.67223	1.67077	1.67548	-0.94886	0.407464	1
NR_104358	chr7	25659153	25668032	+	1104	1	Exosc5|D7Wsu180e|-|7 A3|7 13.96 cM|protein-coding	10.0141	10.0115	10.0822	10.041	10.0856	0.101869	0.155515	0.594045
NM_030069	chr9	48318004	48340898	-	3360	1	Nxpe2|4432416J03Rik|AI323362|Fam55b|-|9|9 A5.3|protein-coding	2.0332	2.02824	2.03653	2.03332	2.02892	0.395584	0.71543	1
NM_133898	chr5	150571643	150594525	-	1899	1	N4bp2l1|2410024N18Rik|AI428195|B230342M21Rik|-|5|5 G3|protein-coding	4.27395	4.25833	4.259	4.26245	4.24806	-0.344559	0.479961	0.887109
NM_011954	chr13	12790818	12800058	-	827	1	Prl2c4|MRP-3|Mrpplf3|PLF-3|mrp/plf3|-|13|13 A1|protein-coding	4.14604	4.14589	4.14909	4.15315	4.15397	0.252567	0.620035	0.941679
NM_027988	chr17	24696234	24700529	+	2227	1	Noxo1|2310034C04Rik|P41NOX|P41NOXA|P41NOXB|P41NOXC|Snx28|hslt|-|17 A3.3|17 12.49 cM|protein-coding	6.32819	6.35641	6.32483	6.30658	6.34012	-0.177514	0.465118	0.880071
NM_028805	chr8	95081201	95099874	+	3403	1	Katnb1|2410003J24Rik|KAT|-|8|8 C5|protein-coding	9.90094	9.93578	9.92497	9.93212	9.95673	0.035235	0.632935	0.943384
NR_040353	chr2	12301246	12312315	+	2771	1	E030013I19Rik|-|-|2 A1|2|ncRNA	-1.86719	-1.86737	-1.86631	-1.86759	-1.86764	0.260813	0.95441	1
NM_021495	chr16	46447161	46496967	-	3062	1	Nectin3|2610301B19Rik|3000002N23Rik|4921513D19Rik|AA407785|AU016832|AW538082|CD113|Pvrl3|-|16|16 B5|protein-coding	10.5821	10.6458	10.5987	10.6516	10.6453	0.0268383	0.671767	0.949928
NM_011985	chr4	155650655	155653384	-	1424	1	Mmp23|CA-MMP|-|4|4 E2|protein-coding	3.23166	3.23608	3.22321	3.23763	3.24357	0.0737919	0.920715	0.989698
NM_009169	chr6	6558275	6578658	-	486	1	Shfm1|DSS1|Shfdg1|Shfg|-|6|6 A1|protein-coding	12.749	12.7722	12.7759	12.7643	12.7847	0.0171671	0.637143	0.943384
NR_045386	chr18	49803332	49817956	-	697	1	1700065O20Rik|-|-|18|18 D1|ncRNA	0	0	0	0	0	NA	1	1
NM_146645	chr2	87990113	87991054	+	940	1	Olfr1158|MOR173-3|-|2|2 D|protein-coding	0	0	0	0	0	NA	1	1
NM_008609	chr8	95352296	95374293	+	4308	1	Mmp15|AI503551|MT-MMP 2|MT2-MMP|-|8 C5|8 47.12 cM|protein-coding	0	0	0	0	0	NA	1	1
NM_001163143	chr9	67830532	67832330	-	1348	1	C2cd4a|EG244911|Fam148a|-|9|9 C|protein-coding	0	0	0	0	0	NA	1	1
NM_145923	chr5	63908898	63968897	-	3231	1	Rell1|AA536743|-|5|5 C3.1|protein-coding	10.4246	10.34	10.3711	10.3204	10.3389	-0.0633468	0.359843	0.819666
NM_001159599	chr4	152039321	152060038	+	3728	1	Nol9|4632412I24Rik|6030462G04Rik|AI449622|AW490720|-|4|4 E2|protein-coding	10.6475	10.6813	10.6354	10.7063	10.6861	0.0184731	0.766568	0.969756
NM_177742	chr8	43129807	43141486	-	1842	1	Triml1|4933403D14|BC050188|-|8|8 A4|protein-coding	0	0	0	0	0	NA	1	1
NM_025886	chr7	141215860	141218658	+	1517	1	Rassf7|2400009B11Rik|AW210608|-|7|7 F5|protein-coding	9.29077	9.2175	9.25915	9.23404	9.25961	-0.00574354	0.950989	0.991892
NR_015522	chr13	3478303	3492398	+	580	1	2810429I04Rik|AI256682|-|13|13 A1|ncRNA	6.59967	6.62987	6.61149	6.58798	6.60693	-0.105795	0.629182	0.943384
NM_028604	chr10	30534225	30600749	-	2344	1	Trmt11|2410075D05Rik|3110045I18Rik|AW213713|-|10|10 A4|protein-coding	8.97483	9.00685	9.03837	9.04027	8.97228	0.0632399	0.538778	0.919381
NM_030734	chr8	19247592	19250828	+	192	1	Defb5|BD-5|-|8|8 A1.3|protein-coding	0	0	0	0	0	NA	1	1
NM_001170571	chr5	92571537	92591284	+	1315	1	Fam47e|C730043O17|Gm1381|-|5|5 E2|protein-coding	0	0	0	0	0	NA	1	1
NM_001347052	chr4	11331933	11386778	-	3675	1	Esrp1|2210008M09Rik|A630065D16|BC031468|Rbm35a|-|4|4 A1|protein-coding	0	0	0	0	0	NA	1	1
NM_175563	chr11	87089156	87108714	-	3815	1	Prr11|B930067F20Rik|-|11|11 C|protein-coding	10.7239	10.6913	10.683	10.7238	10.6845	-0.014783	0.804234	0.973682
NM_023429	chr5	73292794	73314077	+	1518	1	Ociad1|6030432N09Rik|AI481327|AW557942|Asrij|B230209J16Rik|BB021357|Emi2|Imi2|OCIA|TPA018|-|5|5 C3.2|protein-coding	12.0935	12.1384	12.1082	12.0928	12.173	0.0112648	0.812652	0.973806
NM_029497	chr16	90751527	90810413	-	7324	1	Urb1|4921511H13Rik|5730405K23Rik|AA670781|AI645590|mKIAA0539|-|16|16 C3.3|protein-coding	10.8206	10.7806	10.6729	10.719	10.6604	-0.176909	0.00341993	0.0362602
NM_001080812	chr8	72204335	72212837	-	639	1	Cib3|C730014M21Rik|Gm1107|KIP3|-|8|8 B3.3|protein-coding	2.40941	2.41175	2.41953	2.41712	2.409	0.652104	0.505826	0.899218
NM_172707	chr5	32458970	32493712	+	4014	1	Ppp1cb|1200010B19|-|5|5 B1|protein-coding	12.5326	12.4891	12.4465	12.4961	12.502	-0.0351582	0.401977	0.848035
NM_175091	chr8	34829179	34965690	-	6415	1	Tnks|4930554K12Rik|AI662855|ARTD5|C86528|D130072O21Rik|TANK1|mTNKS1|-|8 A4|8 21.16 cM|protein-coding	11.3814	11.355	11.3256	11.4973	11.3417	0.0318297	0.646061	0.944984
NM_021424	chr9	43744576	43807461	+	5053	1	Nectin1|AI835281|AW549174|Cd111|HIgR|HveC|PRR|PRR1|Pvrl1|nectin-1|-|9|9 A5.1|protein-coding	9.52765	9.39099	9.5874	9.72491	9.75124	0.474782	1.6977e-05	0.0003053
NM_001077190	chr2	22940074	23040241	-	3407	1	Abi1|E3B1|NAP1|Ssh3bp1|abi-1|-|2 A3|2 15.18 cM|protein-coding	12.0919	12.1224	12.0609	12.0865	12.0594	-0.0500088	0.234474	0.710574
NR_036459	chr12	112411023	112423198	-	1748	1	A730018C14Rik|-|-|12|12 F1|ncRNA	0	0	0	0	0	NA	1	1
NR_029730	chr17	17830352	17830444	+	92	1	Mirlet7e|Mirnlet7e|mmu-let-7e|-|17|17 A3.2|ncRNA	3.60176	3.58973	3.58484	3.57613	3.57926	-0.855548	0.153488	0.590229
NM_183182	chr4	106590909	106617238	-	1958	1	Lexm|-|-|4|4 C7|protein-coding	0.222086	0.21889	0.223272	0.222233	0.220203	1.0195	0.630908	1
NM_001004184	chr7	81114799	81170416	+	2826	1	Slc28a1|Cnt1|-|7|7 D3|protein-coding	2.09352	2.10043	2.09235	2.08801	2.08908	-1.08727	0.274869	0.756886
NR_028537	chr4	132310703	132310758	+	55	1	Snord99|MBII-420|-|4 D2.3|4|snoRNA	3.80538	3.80251	3.81957	3.80589	3.80628	0.347273	0.553631	0.925525
NM_001177467	chr17	36127609	36129425	-	893	1	Gm7030|EG630294|H2-t9|-|17|17 B1|protein-coding	-1.32544	-1.32568	-1.32576	-1.3245	-1.32462	1.03725	0.781125	1
NR_028286	chr2	132490728	132524057	+	843	1	1700026D11Rik|-|-|2|2 F2|ncRNA	-0.853402	-0.856244	-0.85631	-0.856432	-0.852887	-0.544997	0.855515	1
NM_013906	chr9	30942562	30963838	+	4602	1	Adamts8|METH-2|METH2|-|9 A4|9 16.49 cM|protein-coding	0.218595	0.209122	0.211405	0.210722	0.208673	-1.98043	0.342804	1
NM_007390	chr7	63098692	63212526	-	2079	1	Chrna7|Acra7|alpha7|nAchR|-|7 C|7 34.47 cM|protein-coding	0	0	0	0	0	NA	1	1
NM_001346785	chr15	93239730	93275179	-	6634	1	Gxylt1|Glt8d3|Gm1228|Gm87|-|15|15 E3|protein-coding	10.3234	10.2961	10.3644	10.3719	10.3965	0.114593	0.0782588	0.397962
NR_029803	chr10	126995530	126995613	+	83	1	Mir26a-2|Mirn26a-2|mir-26a-2|-|10|10 D3|ncRNA	0.765664	0.764175	0.763743	0.760675	0.760434	-1.24808	0.421717	1
NR_037964	chr11	59197793	59202431	-	2902	1	2610507I01Rik|5033414D05Rik|-|11|11 B1.3|ncRNA	7.80791	7.78232	7.65608	7.7596	7.7115	-0.359377	0.0289251	0.200463
NR_002173	chr7	99479563	99479707	-	144	1	Snord15b|Gm5775|Rnu15-b|Rnu15b|U15B|-|7 E1|7|snoRNA	8.68082	8.22624	8.12308	8.10797	8.14316	-1.11158	0.0166778	0.131588
NM_001025431	chr2	138256584	138287422	+	4631	1	Btbd3|mKIAA0952|-|2|2 F3|protein-coding	10.0537	9.98614	9.99659	10.0413	10.0631	0.0277522	0.714363	0.961674
NM_010344	chr8	33653238	33698162	+	2657	1	Gsr|AI325518|D8Ertd238e|Gr-1|Gr1|-|8 A3|8 20.69 cM|protein-coding	12.0637	12.0539	12.0676	12.0207	12.0095	-0.0341988	0.438027	0.868861
NM_153799	chr9	57708569	57750162	+	3333	1	Edc3|AA517853|Lsm16|Yjdc|-|9|9 B|protein-coding	8.81969	8.74606	8.82659	8.85636	8.78515	0.108655	0.334386	0.804951
NM_144860	chr18	10725625	10812217	+	3770	1	Mib1|DIP-1|E430019M12Rik|Mib|mKIAA1323|-|18|18 A1|protein-coding	11.9531	11.9175	11.9194	11.9495	11.9043	-0.0133954	0.764489	0.969403
NM_146251	chr2	24976033	25054072	+	4552	1	Pnpla7|BC027342|E430013P11Rik|Nre|-|2|2 A3|protein-coding	8.51226	8.45052	8.46433	8.51128	8.44885	-0.0179978	0.883428	0.984626
NM_175520	chr5	123876736	123880020	-	3282	1	Hcar1|Gpr81|-|5|5 F|protein-coding	0	0	0	0	0	NA	1	1
NM_172729	chr6	54923942	54972612	-	4308	1	Nod1|C230079P11|Card4|F830007N14Rik|Nlrc1|-|6|6 B3|protein-coding	4.7414	4.75574	4.75245	4.75472	4.76009	0.193211	0.643598	0.944258
NM_001011810	chr7	108158918	108159871	-	952	1	Olfr485|MOR204-30P|-|7|7 E3|protein-coding	0	0	0	0	0	NA	1	1
NM_001037127	chr4	58285962	58374303	+	3404	1	Musk|Mdk4|Mlk|Nsk1|Nsk2|Nsk3|-|4 B3|4 31.87 cM|protein-coding	-0.17365	-0.173863	-0.169626	-0.172332	-0.170871	2.50377	0.297469	1
NM_146230	chr9	119148043	119157093	-	1655	1	Acaa1b|-|-|9|9 F3|protein-coding	0.852073	0.845758	0.852395	0.850812	0.846862	0.459296	0.787585	1
NM_172647	chr1	171437561	171464593	+	2470	1	F11r|9130004G24|AA638916|ESTM33|JAM|JAM-1|JAM-A|Jcam|Jcam1|Ly106|-|1 H3|1 79.43 cM|protein-coding	11.1898	11.1922	11.2051	11.1132	11.193	-0.0291014	0.611739	0.9402
NR_033589	chr8	33484311	33485757	+	1446	1	Hmgb1-rs17|Hmg1-rs17|-|8|8 A3|pseudo	0	0	0	0	0	NA	1	1
NM_001128625	chrX	57409149	57488771	+	2146	1	Gm364|-|-|X|X A6|protein-coding	-0.0913326	-0.0944608	-0.0923012	-0.0947189	-0.0896779	0.578728	0.809851	1
NM_001081075	chr19	38188479	38224132	-	1383	1	Fra10ac1|5730455O13Rik|AI448293|-|19|19 C2|protein-coding	9.42729	9.44736	9.4324	9.36195	9.44882	-0.0485585	0.594007	0.936946
NM_010111	chr8	8617439	8660773	-	4312	1	Efnb2|ELF-2|Epl5|Eplg5|Htk-L|LERK-5|Lerk5|NLERK-1|-|8 A1.1|8 3.42 cM|protein-coding	11.4502	11.1487	11.1367	11.2248	11.3021	-0.122705	0.479343	0.887109
NM_001039095	chr2	25793967	25815836	-	1084	1	Glt6d1|4933411C14Rik|GT6m7|-|2|2 A3|protein-coding	0	0	0	0	0	NA	1	1
NR_002878	chr8	19210462	19212760	+	166	1	Defa-ps12|Defb46-ps|EG654452|-|8 A1.3|8|pseudo	0	0	0	0	0	NA	1	1
NM_007528	chr11	70224127	70229798	-	3415	1	Bcl6b|Bazf|-|11|11 B3|protein-coding	-1.26938	-1.26967	-1.26802	-1.26831	-1.26998	1.25621	0.719277	1
NM_026883	chr5	122364584	122371963	-	974	1	Fam216a|1500011H22Rik|-|5|5 F|protein-coding	10.3794	10.4066	10.3791	10.4333	10.4243	0.031927	0.625154	0.942726
NR_033224	chr19	5388336	5390069	+	1733	1	D330050I16Rik|-|-|19 A|19|ncRNA	7.85876	7.8073	7.83705	7.84447	7.82937	0.0178556	0.902571	0.98815
NM_009463	chr8	83290348	83298456	+	1636	1	Ucp1|AI385626|Slc25a7|Ucp|-|8 C2|8 39.65 cM|protein-coding	0	0	0	0	0	NA	1	1
NM_001009575	chrX	135742692	135747326	+	2818	1	Armcx5|AW556585|-|X|X F1|protein-coding	9.1319	9.07694	9.11052	9.10833	9.14711	0.044352	0.647574	0.945439
NM_015752	chr19	46396896	46488804	+	4511	1	Sufu|Su(fu)|-|19 C3|19 38.85 cM|protein-coding	9.10609	9.03945	9.05947	9.08307	9.07546	0.00195542	0.984091	0.99676
NM_029859	chr2	25608629	25617678	-	1709	1	Ccdc183|4921530D09Rik|Cccd183|Kiaa1984|-|2|2 A3|protein-coding	3.15507	3.14692	3.15201	3.15029	3.15174	0.0314904	0.964704	0.992755
NM_028029	chr19	43846815	43940198	-	6095	1	Dnmbp|2410003L07Rik|2410003M15Rik|TUBA|-|19|19 C3|protein-coding	11.2634	11.2418	11.4925	11.5605	11.5425	0.390637	4.25495e-14	1.74832e-12
NM_001193271	chr11	18880428	19018969	-	3426	1	Meis1|C530044H18Rik|Evi8|-|11 A3.1|11 11.11 cM|protein-coding	9.34	9.37131	9.16135	9.11246	9.15834	-0.472858	1.87641e-07	4.52659e-06
NM_201363	chr1	107271201	107278371	-	1649	1	Serpinb3c|1110001H02Rik|1110013A16Rik|Scca2|Serpinb4|-|1|1 E2.1|protein-coding	0	0	0	0	0	NA	1	1
NM_013547	chr16	37580153	37632026	+	1692	1	Hgd|Hgo|aku|-|16 B3|16 26.4 cM|protein-coding	0.847657	0.851838	0.851421	0.850292	0.853227	0.791434	0.641884	1
NM_023153	chr9	14500619	14510620	+	1143	1	Cwc15|0610040D20Rik|2900052N06Rik|Ed1|c11orf5|mED1|-|9|9 A2|protein-coding	11.2252	11.173	11.2125	11.2028	11.2049	0.011921	0.818437	0.974279
NM_009246	chr12	103763587	103773633	-	1435	1	Serpina1d|AI118301|Dom4|PI4|Spi1-4|-|12 E|12 52.98 cM|protein-coding	0	0	0	0	0	NA	1	1
NR_040601	chr1	62790918	62794732	-	892	1	4930487H11Rik|-|-|1|1 C2|ncRNA	5.46793	5.44315	5.39524	5.41972	5.38605	-0.883428	0.00835016	0.0758195
NR_077222	chr7	73808222	73816503	-	2692	1	Gm10619|4932443D20|ENSMUSG00000074067|-|7 D1|7 42.25 cM|ncRNA	0	0	0	0	0	NA	1	1
NM_001085521	chr2	149830783	150004392	+	2049	1	Syndig1|AW123113|DSPC2|Gm14134|H2C20orf39|OTTMUSG00000015750|Tmem90b|-|2 G3|2|protein-coding	-1.86719	-1.86734	-1.86738	-1.86663	-1.86755	0.260813	0.95441	1
NM_001077713	chr6	6956018	7039220	+	546	1	Sdhaf3|0610005M07Rik|4933430A16Rik|Acn9|-|6|6 A1|protein-coding	8.41656	8.40538	8.41608	8.35845	8.37996	-0.0828525	0.493596	0.893557
NR_045956	chr11	90804691	90895152	+	646	1	4930405D11Rik|-|-|11|11 D|ncRNA	0	0	0	0	0	NA	1	1
NM_001011800	chr6	116506516	116517965	+	2668	1	Olfr212|4931403F16Rik|MOR119-4|-|6|6 E3|protein-coding	0.89958	0.900951	0.898319	0.899359	0.902353	-0.0906537	0.952841	1
NM_030220	chr11	96953338	96977688	-	3026	1	Sp2|4930480I16Rik|mKIAA0048|-|11|11 D|protein-coding	7.77803	7.73103	7.71624	7.76962	7.76416	-0.0160053	0.917521	0.989248
NR_015574	chr8	95806830	95821728	+	2799	1	4930513N10Rik|-|-|8|8 D1|ncRNA	6.73564	6.7121	6.7035	6.71495	6.70944	-0.109162	0.600163	0.938011
NM_001032298	chr3	88377736	88378701	-	467	1	Bglap2|BGP2|Bglap1|Bgp|Og2|mOC-B|-|3 F1|3 38.81 cM|protein-coding	-1.26944	-1.26793	-1.26983	-1.26832	-1.27006	-1.12315	0.744474	1
NM_001285862	chr4	102760135	102972682	+	4829	1	Sgip1|3110007P09Rik|SGIP1alpha|gag|-|4|4 C6|protein-coding	2.44523	2.43892	2.43793	2.43889	2.44289	-0.264384	0.76875	0.969921
NM_026888	chr7	127573348	127583307	+	1614	1	Phkg2|1500017I02Rik|-|7|7 F3|protein-coding	8.39427	8.43044	8.43937	8.45424	8.43049	0.0891524	0.453635	0.876079
NM_027889	chr9	44348105	44361670	-	3162	1	Vps11|1200011A11Rik|-|9|9 A5.2|protein-coding	10.148	10.1265	10.1322	10.1679	10.1663	0.0335928	0.626237	0.943138
NM_001025444	chr4	40682078	40703194	-	5544	1	Aptx|2410016G21Rik|AA388047|FHA-HIT|-|4|4 A5|protein-coding	9.50333	9.41259	9.46688	9.47406	9.48467	0.0382099	0.66715	0.94856
NM_153804	chr12	76533560	76579039	+	4934	1	Plekhg3|BC030417|-|12|12 C3|protein-coding	11.6759	11.6433	11.7714	11.7588	11.7503	0.135154	0.00289484	0.0316127
NM_019645	chr1	135871394	135919207	-	4654	1	Pkp1|-|-|1|1 E4|protein-coding	12.1211	12.1182	12.7244	12.6923	12.7059	0.741439	8.30654e-79	1.42001e-76
NR_045349	chr10	25779314	25837437	-	860	1	4930401C15Rik|-|-|10|10 A4|ncRNA	-1.86719	-1.86737	-1.86631	-1.86759	-1.86764	0.260813	0.95441	1
NM_001163247	chr2	180929023	180934010	+	1169	1	Birc7|E130019N06|KIAP|Livin|ML-IAP|-|2|2 H4|protein-coding	0.222086	0.21889	0.223272	0.222233	0.220203	1.0195	0.630908	1
NM_145079	chr1	88134809	88220002	+	3294	1	Ugt1a6a|UDPGT|UDPGT 1-6|UGT1-06|UGT1.6|Ugt1a6|Ugt1a7|-|1|1 D|protein-coding	11.4081	11.483	11.4263	11.4384	11.4667	-0.00438489	0.932679	0.990382
NM_001252577	chr6	130044017	130067271	-	950	1	Klra4|Chok|Klra32|Klra33|Ly-49d|Ly49d|ly49r<129>|-|6 F3|6 63.44 cM|protein-coding	8.4021	8.41553	8.61785	8.62189	8.61153	0.651351	3.34235e-08	8.83234e-07
NM_001163064	chr10	82128013	82153065	+	2628	1	AU041133|-|-|10|10 C1|protein-coding	8.22938	8.25571	8.25124	8.26702	8.2646	0.0615704	0.62203	0.942138
NM_026338	chr9	107928469	107932461	+	3990	1	Actl11|4921517D21Rik|-|9|9 F1|protein-coding	0	0	0	0	0	NA	1	1
NR_102313	chr17	55997076	56005606	-	1624	1	Stap2|AW049765|STAP-2|-|17|17 D|protein-coding	5.8775	5.85628	5.881	5.87296	5.87641	0.13104	0.641997	0.943798
NM_013632	chr14	50944303	50953412	+	2933	1	Pnp|AL024301|AU015798|Np|Np-1|Np-2|Pnp1|-|14 C1|14 26.31 cM|protein-coding	10.406	10.4824	10.4783	10.4457	10.4364	0.0111288	0.866991	0.982784
NM_207654	chr17	62602957	62881317	-	5252	1	Efna5|AL-1|AV158822|EFL-5|Ephrin-A5|Epl7|LERK-7|RAGS|-|17 E1.1|17 32.57 cM|protein-coding	8.32376	8.18342	8.23403	8.29958	8.19945	-0.0350002	0.823453	0.974996
NM_001166064	chr3	145987870	146021720	+	5486	1	Syde2|C430017H16Rik|-|3|3 H2|protein-coding	9.62512	9.63641	9.56218	9.59525	9.5659	-0.113247	0.160013	0.604062
NM_026005	chr4	10874498	10899423	+	2110	1	2610301B20Rik|AI428449|-|4|4 A1|protein-coding	10.3064	10.3522	10.378	10.3877	10.3717	0.0806646	0.215444	0.683228
NR_040614	chr2	113691053	113708550	-	1023	1	4930533B01Rik|-|-|2|2 E4|ncRNA	4.25082	4.25833	4.19648	4.20658	4.19633	-1.91693	9.21569e-05	0.00146341
NR_003649	chr12	36090379	36091829	+	1450	1	Gm5434|EG432649|-|12 A3|12|pseudo	4.1611	4.1696	4.14826	4.1706	4.16124	-0.204322	0.692622	0.954856
NM_001163755	chr9	63138164	63147011	-	3605	1	Skor1|AV273001|C230094B15Rik|Corl1|Lbxcor1|-|9|9 B|protein-coding	-0.507663	-0.513938	-0.511514	-0.51418	-0.514237	-2.3552	0.365551	1
NM_025531	chr2	174465091	174472941	-	1381	1	Slmo2|2310042G06Rik|AA407013|Prelid3b|-|2|2 H4|protein-coding	11.4985	11.5489	11.565	11.4753	11.5405	0.00312776	0.953677	0.992083
NM_021403	chr5	135818106	135874772	+	3915	1	Srrm3|2900083I11Rik|AB041661|SRm300-like|Srrm2l|-|5|5 G2|protein-coding	0.109787	0.111832	0.111611	0.114538	0.110828	1.0575	0.630705	1
NM_146690	chr19	13453571	13454515	-	943	1	Olfr1472|MOR202-16|-|19|19 A|protein-coding	0	0	0	0	0	NA	1	1
NM_019410	chr3	57841895	57847757	-	2015	1	Pfn2|Pfn|-|3 D|3 28.15 cM|protein-coding	4.58417	4.58	4.60121	4.57945	4.57955	0.140413	0.753815	0.966878
NM_028443	chr5	125003475	125012547	+	1645	1	Rflna|3110032G18Rik|Fam101a|cfm|cfm2|-|5|5 G1.1|protein-coding	4.32745	4.33181	4.33893	4.34478	4.34806	0.538339	0.272841	0.75485
NM_011218	chr17	56412426	56476480	-	6824	1	Ptprs|AL022616|PTP|PTP-NU3|PTPNU-3|PTPsigma|Ptpt9|R-PTP-S|RPTPsigma|-|17 D|17 29.32 cM|protein-coding	12.768	12.7318	12.7642	12.8262	12.8302	0.0715237	0.0827084	0.413154
NM_146614	chr9	39839436	39840359	+	922	1	Olfr971|MOR171-13|-|9|9 A5.1|protein-coding	0	0	0	0	0	NA	1	1
NM_172259	chr10	128494157	128498685	-	1017	1	Myl6b|5730437E04Rik|BC037527|MLC1SA|-|10|10 D3|protein-coding	6.1997	6.13586	6.1677	6.19906	6.17887	0.151165	0.587482	0.933641
NM_001177534	chr8	58698849	58700796	-	1946	1	Gm15881|OTTMUSG00000027193|-|8|8 B2|protein-coding	0	0	0	0	0	NA	1	1
NM_001033247	chr16	44394799	44482428	+	6546	1	Cfap44|6330444M21Rik|D16Ertd642e|Gm1750|Wdr52|-|16 B4|16 28.72 cM|protein-coding	3.59892	3.59935	3.61009	3.59427	3.60207	0.176024	0.778339	0.971908
NR_131095	chr14	30458036	30463282	+	1184	1	4831407H17Rik|-|-|14|14 B|ncRNA	0	0	0	0	0	NA	1	1
NR_131111	chr11	63964226	63968040	+	1068	1	9630013K17Rik|-|-|11|11 B3|ncRNA	4.81622	4.80095	4.82423	4.82472	4.82792	0.464713	0.262492	0.743434
NM_146403	chr2	111564504	111565442	-	937	1	Olfr1295|MOR248-10|-|2|2 E3|protein-coding	0	0	0	0	0	NA	1	1
NM_021282	chr7	140763832	140774977	+	1725	1	Cyp2e1|Cyp2e|-|7 F4|7 85.94 cM|protein-coding	2.25249	2.25639	2.25049	2.24748	2.24133	-1.08903	0.259818	0.740968
NM_008795	chr1	132113547	132139685	-	3028	1	Cdk18|AA682070|Ctk18|Pctk3|-|1|1 E4|protein-coding	11.667	11.5855	11.4757	11.5585	11.5153	-0.146856	0.00719484	0.0675895
NR_027798	chr11	4620275	4627766	-	1316	1	Gm11961|OTTMUSG00000005065|-|11 A1|11|ncRNA	0	0	0	0	0	NA	1	1
NR_045876	chr11	45808083	45842878	+	2392	1	F630206G17Rik|-|-|11|11 B1.1|ncRNA	-1.26938	-1.26967	-1.26802	-1.26831	-1.26998	1.25621	0.719277	1
NM_010477	chr1	55077834	55087932	-	2318	1	Hspd1|60kDa|Hsp60|-|1|1 C1.2|protein-coding	15.2245	15.2517	15.2403	15.1983	15.2312	-0.017177	0.572675	0.93214
NM_016659	chr6	130363918	130386874	-	1656	1	Klra1|A1|CH29-493D4.3|Klra22|Ly49a|Ly49o<129>|Ly49v|-|6 F3|6 63.44 cM|protein-coding	4.85968	4.84048	4.85709	4.85784	4.86115	0.223991	0.579745	0.933386
NM_029967	chr4	86053915	86428382	+	7809	1	Adamtsl1|5930437A14Rik|6720426B09Rik|ADAMTSL-1|-|4|4 C4|protein-coding	0	0	0	0	0	NA	1	1
NM_030167	chrX	53243415	53269805	-	4323	1	Fam122b|4632404H22Rik|AI256344|SPACIA2|-|X|X A5|protein-coding	8.10399	8.16335	8.11957	8.15876	8.09765	-0.032677	0.812128	0.973806
NM_016787	chr9	69989466	70011659	+	5793	1	Bnip2|5730523P12Rik|BNIP2beta|Nip21|-|9|9 D|protein-coding	12.175	12.2101	12.2692	12.2064	12.2524	0.0630075	0.151632	0.586657
NR_035445	chr17	35917889	35917969	+	80	1	Mir1894|Mirn1894|mmu-mir-1894|-|17 B1|17 18.77 cM|ncRNA	5.28893	5.30315	5.28223	5.2857	5.28245	-0.232997	0.488119	0.89149
NM_010673	chr16	89419323	89420111	-	786	1	Krtap6-2|AI646275|HGTpII.4|-|16|16 C3.3|protein-coding	0	0	0	0	0	NA	1	1
NM_007855	chr1	91801461	91848034	+	1331	1	Twist2|Dermo1|bHLHa39|-|1|1 D|protein-coding	9.44217	9.41963	9.39809	9.40307	9.43364	-0.0393904	0.646579	0.945026
NM_025314	chr2	144599953	144768747	+	1275	1	Dtd1|0610006H08Rik|DUE-B|Hars2|-|2|2 G1|protein-coding	9.76827	9.81369	9.83556	9.80713	9.78523	0.0320816	0.681672	0.951583
NR_131162	chr6	124363282	124364486	-	401	1	1700027F06Rik|-|-|6|6 F2|ncRNA	-1.86719	-1.86733	-1.86737	-1.86748	-1.86672	0.260813	0.95441	1
NM_001099321	chrX	135169305	135177614	-	1992	2	Gm15023|OTTMUSG00000018782|-|X|X F1|protein-coding	0	0	0	0	0	NA	1	1
NR_105978	chr3	88440879	88440951	-	72	1	Mir7011|Gm27677|mmu-mir-7011|-|3|3 F1|ncRNA	-0.149438	-0.152526	-0.152592	-0.150962	-0.147785	0.496364	0.838169	1
NM_001081073	chr18	67617397	67641336	-	3965	1	Cep76|6230425F05Rik|9630013E05|-|18|18 E1|protein-coding	9.98769	10.005	9.91416	9.90752	9.8479	-0.195359	0.00949007	0.0838068
NM_177856	chr3	63914696	63929385	-	1534	1	E130311K13Rik|-|-|3|3 E1|protein-coding	9.05078	9.09596	9.02668	9.05354	9.02765	-0.0924744	0.339503	0.807609
NM_001081077	chr19	44108637	44135876	-	3565	1	Cwf19l1|2610528C06Rik|AI854304|AV336991|-|19|19 C3|protein-coding	9.74996	9.73805	9.69242	9.7666	9.73029	-0.0252872	0.753368	0.966878
NM_001282443	chr15	75882934	75888723	-	3357	1	Mroh6|Gm19570|-|15|15 D3|protein-coding	5.81345	5.84233	5.80794	5.80229	5.81187	-0.2711	0.339467	0.807609
NM_183222	chr3	87435782	87467524	+	2426	1	Fcrl5|Fcrh3|mBXMH2|-|3|3 F1|protein-coding	-1.30565	-1.30803	-1.30813	-1.30839	-1.30658	-1.30728	0.688413	1
NM_175640	chr7	79721164	79732776	-	1905	1	Plin1|6030432J05Rik|Peri|Plin|-|7|7 D2|protein-coding	0.347111	0.349115	0.351045	0.350015	0.349695	1.34459	0.515561	1
NM_029522	chr3	108678638	108722299	-	3471	1	Gpsm2|6230410J09Rik|LGN|Pins|-|3|3 F3|protein-coding	12.1722	12.215	12.1637	12.1771	12.1425	-0.0428262	0.310289	0.785534
NM_183147	chr7	140150628	140154659	-	3152	1	Sprn|C630041J07|-|7|7 F4|protein-coding	2.29684	2.30396	2.29834	2.30118	2.30001	-0.0832655	0.930533	0.990382
NR_045302	chr17	3557824	3559863	+	560	1	1700102H20Rik|-|-|17|17 A1|ncRNA	3.24648	3.24858	3.25328	3.24709	3.25181	0.239552	0.730794	0.962722
NM_172437	chr15	94522640	94543507	-	2837	1	Pus7l|3000003F02Rik|-|15|15 E3|protein-coding	8.80233	8.82427	8.73237	8.75716	8.75872	-0.171204	0.100674	0.467642
NM_027790	chr14	55222007	55241440	+	1260	1	Dhrs2|5430405K24Rik|Hep27|-|14 C3|14|protein-coding	0	0	0	0	0	NA	1	1
NR_102724	chrX	53686527	53691325	+	1214	1	LOC100504039|-|-|X A5|ncRNA	0	0	0	0	0	NA	1	1
NM_029509	chr5	105014153	105053561	-	2447	1	Gbp8|5830443L24Rik|mGBP8|-|5|5 E5|protein-coding	0	0	0	0	0	NA	1	1
NM_025689	chr9	109082496	109093363	+	2391	1	Ccdc51|5730568A12Rik|AI551049|-|9|9 F2|protein-coding	8.37969	8.4186	8.42945	8.39326	8.3418	-0.0367333	0.77368	0.971561
NM_001177416	chr7	6252710	6281861	+	914	1	Gm6792|EG627821|-|7|7 A1|protein-coding	1.40524	1.40409	1.40592	1.40816	1.41243	1.3527	0.361241	1
NM_033039	chr5	144019807	144050609	-	728	1	Ocm|-|-|5 G2|5 82.85 cM|protein-coding	-0.416134	-0.41403	-0.414229	-0.41477	-0.414938	0.350508	0.885158	1
NM_145363	chr11	120442631	120447321	+	2059	1	Tspan10|Ocsp|-|11|11 E2|protein-coding	0.470007	0.463787	0.465949	0.467116	0.466773	-0.127109	0.944527	1
NM_177751	chrX	157821573	158043197	-	5480	1	Cnksr2|Cnk2|Ksr2|-|X|X F4|protein-coding	0	0	0	0	0	NA	1	1
NM_207175	chr17	33199062	33200009	+	946	1	Olfr239|ENSMUSG00000079308|MOR267-10|-|17|17 B1|protein-coding	-1.23488	-1.24035	-1.24048	-1.24077	-1.24081	-3.33727	0.280271	1
NM_029928	chr10	116301374	116389538	+	11878	1	Ptprb|3230402H02Rik|C130094E24|Ptpz|Rptpb|VE-PTP|Veptp|-|10|10 D2|protein-coding	1.51917	1.51742	1.51913	1.51736	1.52019	0.151893	0.90297	1
NM_183027	chr1	79606876	79671972	-	2869	1	Ap1s3|1190009B22|Jr2|[s]3A|-|1|1 C4|protein-coding	7.44399	7.41184	7.37679	7.39213	7.34144	-0.294139	0.0839276	0.418038
NR_045714	chr14	61492688	61500382	+	674	1	4930556J02Rik|-|-|14|14 D1|ncRNA	0	0	0	0	0	NA	1	1
NR_033493	chr16	32665223	32668197	-	1389	1	Tnk2os|ENSMUSG00000075265|Gm10818|-|16 B3|16|ncRNA	6.64455	6.64768	6.57006	6.57783	6.5934	-0.514876	0.0156879	0.125621
NM_027427	chr11	83473108	83506740	+	2031	1	Taf15|2610111C21Rik|68kDa|TAFII68|Taf2n|-|11|11 C|protein-coding	10.7877	10.4373	10.412	10.5415	10.6757	-0.127376	0.619896	0.941609
NM_146921	chr11	73395076	73399495	-	1243	1	Olfr1|I54|MOR135-13|-|11 B4|11 45.33 cM|protein-coding	0	0	0	0	0	NA	1	1
NM_001103158	chr4	145670697	145704437	+	3983	1	Zfp980|Gm13242|OTTMUSG00000011070|-|4 E1|4|protein-coding	10.1569	10.1564	10.1691	10.1829	10.162	0.0255411	0.705659	0.958688
NM_011244	chr15	102234938	102257522	-	2946	1	Rarg|Nr1b3|RAR-gamma|RARD|RARgamma2|-|15 F3|15 57.4 cM|protein-coding	10.3709	10.2891	10.2435	10.2658	10.2321	-0.137662	0.0474441	0.28551
NM_011215	chr12	116485720	117278167	+	4663	1	Ptprn2|4930425H11Rik|IA2beta|PTP-NP|Phol|mKIAA0387|phogrin|-|12 F2|12 62.65 cM|protein-coding	-0.483852	-0.481809	-0.484148	-0.480779	-0.482691	0.25413	0.922812	1
NR_045333	chr9	52679863	52798772	+	1011	1	Gm1715|-|-|9|9 A5.3|ncRNA	0	0	0	0	0	NA	1	1
NM_001029993	chr8	122376616	122417360	+	3783	1	Zc3h18|1190001B23Rik|5830416A07Rik|Nhn1|-|8|8 E1|protein-coding	11.9359	11.8919	11.8961	11.8522	11.8794	-0.0493273	0.275708	0.756886
NM_146255	chr4	107968334	108013532	+	2992	1	Slc1a7|A930031E15Rik|Eaat5|-|4|4 C7|protein-coding	2.18309	2.17271	2.18785	2.17826	2.17734	0.538598	0.620079	0.941679
NM_029868	chr4	116557727	116593882	+	3505	1	Gpbp1l1|5330440M15Rik|BC002292|-|4|4 D1|protein-coding	11.029	11.0806	11.0186	11.0231	11.0151	-0.0543571	0.314062	0.787387
NM_028722	chr11	98795769	98807859	+	4329	1	Msl1|2810017F12Rik|4121402D02Rik|4930463F05Rik|AA682082|Msl-1|-|11|11 D|protein-coding	11.3826	11.3912	11.3749	11.38	11.3826	-0.0108217	0.821846	0.974996
NM_145221	chr14	26918988	26970551	-	6937	1	Appl1|2900057D21Rik|7330406P05Rik|AI585782|AW209077|BB022931|C88264|DIP13|-|14|14 A3|protein-coding	11.4678	11.3926	11.434	11.5223	11.4546	0.0574047	0.308467	0.784309
NM_029383	chr8	47824482	47825475	+	991	1	Cldn22|2210404A22Rik|5330431C14Rik|9530051B05Rik|-|8|8 B1.1|protein-coding	3.84378	3.85376	3.83481	3.83843	3.83545	-0.58778	0.282231	0.762703
NM_008403	chr12	21269806	21286237	-	1865	1	Itgb1bp1|AI449260|AU019480|Icap1|-|12|12 A1.3|protein-coding	10.6458	10.7334	10.7804	10.7398	10.7291	0.0885838	0.164865	0.613769
NM_011515	chrX_GL456233_random	10737	39191	-	2568	1	Vamp7|Sybl1|TI-VAMP|VAMP-7|-|X|X|protein-coding	10.8908	10.9175	10.8995	10.8636	10.8246	-0.0637668	0.278461	0.759624
NM_001177578	chr4	73887065	73891080	-	1285	3	Gm13871|OTTMUSG00000014862|-|4|4 C3|protein-coding	0	0	0	0	0	NA	1	1
NM_029711	chr1	74236550	74268213	+	1585	1	Arpc2|2210023N03Rik|34kDa|p34-Arc|-|1 38.49 cM|1 C3|protein-coding	13.729	13.7625	13.7798	13.7726	13.799	0.0445217	0.172826	0.627293
NM_001081177	chr14	64652531	64806296	+	5562	1	Kif13b|5330429L19Rik|6030414C01|AI429803|C130021D12Rik|GAKIN|-|14|14 D1|protein-coding	9.744	9.79194	9.64867	9.68987	9.64548	-0.208488	0.00888992	0.0794186
NM_001347187	chr1	171917462	171948958	+	1488	1	Slamf6|KAL1|KAL1b|Ly108|NTB-A|NTBA|SF2000|-|1 H3|1 79.54 cM|protein-coding	0	0	0	0	0	NA	1	1
NM_001004152	chr7	18718090	18727248	+	1864	1	Psg22|AA408604|cea9|-|7|7 A3|protein-coding	0	0	0	0	0	NA	1	1
NM_001008706	chr13	3854173	3854761	+	545	1	Calm5|AY314008|Scarf2|-|13|13 A1|protein-coding	0	0	0	0	0	NA	1	1
NR_029650	chr12	109710638	109710700	+	62	1	Mir299a|Mir299|Mirn299|mir-299a|mmu-mir-298|mmu-mir-299|mmu-mir-299a|-|12 F1|12|ncRNA	0	0	0	0	0	NA	1	1
NM_023041	chr1	172126755	172136497	+	3121	1	Pex19|Pxf|-|1 H3|1 79.54 cM|protein-coding	11.5844	11.652	11.6081	11.6791	11.6467	0.0346584	0.50166	0.897479
NM_001122829	chr8	70331494	70353279	-	4624	1	Upf1|B430202H16Rik|NORF1|PNORF-1|Rent1|Upflp|-|8 B3.3|8 34.15 cM|protein-coding	12.0715	12.0665	12.0431	12.051	12.053	-0.025495	0.533984	0.916501
NM_008474	chr15	101525026	101532820	-	2559	1	Krt84|AV235125|HRb-1|Krt2-16|Krt2-3|-|15 F2|15 56.9 cM|protein-coding	0	0	0	0	0	NA	1	1
NR_028282	chr15	80078503	80078579	-	76	1	Snord83b|MBII-10|-|15|15 E1|snoRNA	6.24576	6.23262	6.20644	6.21103	6.22267	-0.258913	0.289813	0.769371
NM_172463	chr1	93235897	93296448	+	4441	1	Sned1|6720455I24Rik|AI197264|AI642697|D430044C15Rik|SST3|Snep|-|1|1 D|protein-coding	10.7574	10.6077	11.2206	11.2437	11.2361	0.823215	8.69458e-37	8.02625e-35
NM_009311	chr6	7555071	7562973	+	1025	1	Tac1|4930528L02Rik|NK-1|NK1|Nkna|PPT-A|PPTA|SP|-|6 A1|6 3.31 cM|protein-coding	0	0	0	0	0	NA	1	1
NM_027560	chr8	70835138	70839720	-	2336	1	Arrdc2|4632416I05Rik|Ilad1|-|8|8 B3.3|protein-coding	9.44334	9.26822	10.9803	11.0556	11.0702	3.27286	4.71136e-272	2.83645e-269
NM_207264	chr2	115581716	115778768	+	2739	1	BC052040|-|-|2|2 E4|protein-coding	8.23814	8.1742	8.18376	8.21638	8.18695	-0.0343586	0.793865	0.973682
NM_198305	chr4	156229044	156234857	-	3000	1	Klhl17|AL022703|BC058738|-|4|4 E2|protein-coding	8.98101	9.01959	9.00491	8.96039	8.98107	-0.047671	0.631694	0.943384
NM_001163270	chr17	25242659	25256364	-	4609	1	Baiap3|Bap3|Gm937|-|17|17 A3.3|protein-coding	7.59624	7.60689	7.62477	7.64728	7.64671	0.178904	0.248839	0.727182
NM_001142750	chrX	118479706	118480737	-	1029	2	Tgif2lx2|-|-|X|X E1|protein-coding	0	0	0	0	0	NA	1	1
NM_138306	chr2	91932822	91963563	-	3461	1	Dgkz|E130307B02Rik|ENSMUSG00000075035|F730209L11Rik|mDGK[z]|-|2|2 E1|protein-coding	11.5186	11.5627	11.593	11.55	11.5506	0.03051	0.533826	0.916501
NM_146596	chr7	106844613	106845572	+	958	1	Olfr703|MOR283-7|-|7|7 E3|protein-coding	0	0	0	0	0	NA	1	1
NM_001166464	chr13	57421195	57908332	-	3128	1	Spock1|Spock|Ticn1|testican|-|13|13 B1|protein-coding	0	0	0	0	0	NA	1	1
NM_026836	chr17	27901128	27907724	-	1213	1	Taf11|1110038O14Rik|28kDa|AI115401|AL024207|AW552398|PRO214|TAF2I|TAFII28|-|17|17 A3.3|protein-coding	9.49917	9.44986	9.52463	9.55077	9.58716	0.169301	0.0507479	0.298136
NR_131051	chr7	121589903	121591591	+	628	1	1700025J12Rik|-|-|7|7 F2|ncRNA	0	0	0	0	0	NA	1	1
NM_009024	chr11	98937696	98974942	+	3240	1	Rara|Nr1b1|RAR|RARalpha1|-|11 D|11 62.76 cM|protein-coding	10.662	10.5925	10.4019	10.4621	10.4691	-0.287704	1.66362e-05	0.000299949
NM_026666	chr16	5050068	5086285	+	6434	1	Ubn1|1110029L11Rik|2610108L02Rik|AA673476|AW124741|-|16 A1|16 2.49 cM|protein-coding	11.9551	11.8917	12.2772	12.3237	12.2759	0.477486	8.18279e-26	5.81062e-24
NM_019825	chr2	155390656	155440783	-	6856	1	Ncoa6|AIB3|ASC-2|ASC2|NRC|Ncoa7|PRIP|RAP250|mKIAA0181|-|2|2 H1|protein-coding	10.3247	10.0981	10.1714	10.3872	10.1797	0.0535697	0.798068	0.973682
NM_001271569	chr9	95855418	95857882	-	515	1	1700065D16Rik|-|-|9|9 E3.3|protein-coding	5.60546	5.61854	5.62558	5.61915	5.61514	0.119495	0.696879	0.955553
NM_001168672	chr15	85859707	85876573	+	2708	1	Gtse1|B99|Gtse-1|-|15 E2|15 40.42 cM|protein-coding	10.8676	10.8399	10.7719	10.7889	10.8037	-0.0975647	0.0857266	0.423042
NM_146612	chr9	39771772	39772798	-	1025	1	Olfr968|MOR171-15|-|9|9 A5.1|protein-coding	0	0	0	0	0	NA	1	1
NR_035427	chr16	30920554	31275697	-	42	1	Mir1195|Mirn1195|mmu-mir-1195|-|17 E1.3|17 41.87 cM|ncRNA	0	0	0	0	0	NA	1	1
NM_145492	chr18	13687014	13972733	-	6141	1	Zfp521|B930086A16Rik|Evi3|Znf521|-|18 A1|18 7.68 cM|protein-coding	-1.29322	-1.29347	-1.29354	-1.29077	-1.29375	1.08189	0.794161	1
NM_016894	chr1	91179822	91225196	+	2544	1	Ramp1|9130218E19Rik|-|1 D|1 46.08 cM|protein-coding	0	0	0	0	0	NA	1	1
NM_080643	chr11	115799352	115813592	-	4700	1	Caskin2|1600028L06Rik|mKIAA1139|-|11|11 E2|protein-coding	10.2293	10.1008	10.1657	10.2217	10.2611	0.0900553	0.270797	0.752455
NM_008825	chr1	130692255	130715821	-	7291	1	Pfkfb2|4930568D07Rik|-|1|1 E4|protein-coding	10.3032	10.2773	10.3249	10.3591	10.3113	0.0706912	0.288332	0.768474
NM_175370	chr1	58658121	58695989	-	1558	1	Als2cr12|4933405P16Rik|4933425F06Rik|-|1|1 C1.3|protein-coding	4.54206	4.54255	4.57961	4.57449	4.59719	1.58092	0.00227388	0.0255157
NM_010233	chr1	71585473	71653234	-	8377	1	Fn1|E330027I09|Fn|Fn-1|-|1 C3|1 36.05 cM|protein-coding	16.9029	16.6801	16.5056	16.7892	16.5766	-0.189688	0.232542	0.708106
NM_001039116	chrX	102707881	102715209	+	1175	1	Dmrtc1b|Dmrt8.2|Gm714|-|X|X D|protein-coding	0	0	0	0	0	NA	1	1
NM_011829	chr6	29200437	29212297	-	2421	1	Impdh1|B930086D20Rik|IMPDH-I|-|6|6 A3.3|protein-coding	11.5939	11.5653	11.5752	11.5933	11.6556	0.0406169	0.428788	0.863275
NM_023898	chr6	136954523	136963483	+	552	1	Pde6h|A930033D18Rik|PDEgamma|-|6|6 G1|protein-coding	-1.86719	-1.86733	-1.86737	-1.86748	-1.86672	0.260813	0.95441	1
NM_183256	chr15	99725618	99728136	+	719	1	Cox14|2310016M24Rik|AA959804|-|15|15 F1|protein-coding	9.9915	9.94428	9.93602	9.93228	9.97015	-0.0375617	0.612243	0.940402
NM_010926	chr8	120653914	120668112	-	4926	1	Emc8|Cox4nb|Fam158b|Noc4|-|8 E1|8 69.98 cM|protein-coding	11.501	11.4378	11.4644	11.5383	11.5634	0.0749772	0.180879	0.641886
NM_025335	chr13	90089667	90114921	+	10803	1	Tmem167|0610041E09Rik|5730424F14Rik|AU041184|AW537806|ENSMUSG00000060669|Gm10085|Tmem167a|-|13|13 C3|protein-coding	11.8033	11.8761	11.9378	11.918	11.928	0.113424	0.0146612	0.11931
NM_177801	chr11	103208127	103218432	-	1105	1	Spata32|4933400C05Rik|VAD1.2|-|11|11 E1|protein-coding	0.418503	0.41765	0.417404	0.418558	0.418225	-0.000226911	0.999898	1
NM_134034	chr11	29172907	29220797	+	5090	1	Smek2|AW011752|AW557776|Ppp4r3b|mKIAA1387|-|11|11 A3.3|protein-coding	12.3812	12.4546	12.3746	12.3575	12.3489	-0.0747511	0.079517	0.402586
NR_002840	chr1	161035166	161038537	+	2550	1	Gas5|Gas-5|Mir5117|Snhg2|-|1|1 H2.1|ncRNA	14.1854	14.1324	14.1188	14.1194	14.1233	-0.0446558	0.169066	0.622477
NM_001163215	chr5	33721724	33737068	+	4225	1	Fgfr3|CD333|FR3|Fgfr-3|Flg-2|HBGFR|Mfr3|sam3|-|5 B2|5 17.83 cM|protein-coding	2.75549	2.75358	2.75886	2.75026	2.74896	-0.189187	0.816394	0.973806
NM_029802	chr7	105634201	105640416	-	3267	1	Arfip2|2310002N04Rik|POR|Por1|-|7|7 E3|protein-coding	10.7584	10.7414	10.7908	10.8688	10.8581	0.13847	0.0230947	0.168223
NR_033595	chr2	50909684	50911846	+	2162	1	Gm13498|OTTMUSG00000012426|-|2|2 C1.1|pseudo	-1.32544	-1.32568	-1.32576	-1.3245	-1.32462	1.03725	0.781125	1
NR_075088	chr13	104228611	104249622	+	1348	1	Cenpk|B130045K24Rik|BB232189|C530004N04Rik|Cenp-K|Solt|Solzt|-|13|13 D1|protein-coding	9.2562	9.29931	9.2958	9.2382	9.31876	0.013693	0.885664	0.984626
NM_019704	chr9	107533945	107538656	+	2173	1	Tmem115|C78915|Pl6|Pp6|-|9|9 F1|protein-coding	10.3254	10.3551	10.5197	10.4487	10.4874	0.236793	0.000407261	0.00564413
NM_009663	chr5	149265004	149288153	+	1007	1	Alox5ap|Flap|-|5|5 G3|protein-coding	3.24581	3.2399	3.23599	3.2479	3.24549	0.0263966	0.970064	0.993796
NR_027801	chrX	71932438	71940871	+	2139	1	Gm1141|Pasd1|-|X|X A7.3|ncRNA	2.18817	2.20288	2.19044	2.19555	2.19106	-0.468409	0.648835	0.94546
NM_144824	chr11	69561754	69579324	-	1884	1	Wrap53|BC021790|Wdr79|-|11|11 B3|protein-coding	9.7038	9.70405	9.75199	9.75549	9.73141	0.0823552	0.288281	0.768474
NM_024413	chr7	38220654	38227994	-	1555	1	Plekhf1|1810013P09Rik|APPD|LAPF|PHAFIN1|ZFYVE15|-|7|7 B3|protein-coding	9.43376	9.4595	9.73771	9.74202	9.77289	0.626039	7.04176e-14	2.84278e-12
NM_009065	chr18	30974314	31317128	-	1795	1	Rit2|RIBA|Rin|Roc2|-|18|18 B1|protein-coding	0	0	0	0	0	NA	1	1
NM_178799	chr5	121598281	121618938	-	2362	1	Acad12|9330129D05Rik|-|5|5 F|protein-coding	3.55525	3.55527	3.55938	3.54792	3.55076	-0.15341	0.803693	0.973682
NM_027104	chr4	73939371	73950846	-	953	1	2310002L09Rik|2310003M01Rik|AV083437|-|4|4 C3|protein-coding	0	0	0	0	0	NA	1	1
NM_026433	chr11	90030348	90036505	+	1759	1	Tmem100|1810057C19Rik|AV011897|-|11|11 C|protein-coding	0	0	0	0	0	NA	1	1
NM_001033286	chr1	185454848	185468761	+	5829	1	Slc30a10|E130106K10Rik|Gm212|-|1|1 H5|protein-coding	-0.50985	-0.510105	-0.508027	-0.506813	-0.508706	2.14763	0.409021	1
NM_023709	chr8	124576111	124618731	+	2308	1	Capn9|2200003B16Rik|GC36|nCL-4|nCL4|-|8|8 E2|protein-coding	0.509541	0.509198	0.515544	0.514103	0.512023	3.18861	0.127967	1
NM_001286482	chr14	48657677	48667644	-	2302	1	Otx2|E130306E05Rik|-|14 C1|14 25.36 cM|protein-coding	0	0	0	0	0	NA	1	1
NM_023712	chr7	126370060	126377934	-	2689	1	Spns1|2210013K02Rik|Spin1|Spinl|-|7|7 F3|protein-coding	10.0793	10.0782	10.0736	9.99267	10.0463	-0.0733552	0.320673	0.7943
NM_001162932	chr16	10835059	10843235	+	3735	1	Rmi2|A630055G03Rik|Gm537|Gm929|-|16|16 A1|protein-coding	8.75458	8.69893	8.72367	8.6653	8.6722	-0.109402	0.330161	0.802202
NM_001104551	chr17	19362135	19394590	+	2564	1	Vmn2r99|EG665376|-|17|17 A3.2|protein-coding	0	0	0	0	0	NA	1	1
NM_016968	chr16	91269769	91271939	+	2168	1	Olig1|AI836478|AW494459|Bhlhb6|Olg-1|Oligo1|bHLHe21|-|16|16 C3.3|protein-coding	-1.86561	-1.86744	-1.86751	-1.86774	-1.86781	-2.30448	0.573731	1
NM_001031811	chr17	52602709	52979194	+	4269	1	Kcnh8|C130090D05Rik|ELK|ELK1|ELK3|Kv12.1|-|17|17 C|protein-coding	0	0	0	0	0	NA	1	1
NM_028621	chr16	89403027	89403774	-	745	1	Krtap21-1|1110017B05Rik|AI506979|KAP21.1|Krtap16-7|-|16|16 C3.3|protein-coding	0	0	0	0	0	NA	1	1
NM_017367	chr5	93181933	93206495	-	2795	1	Ccni|-|-|5|5 E2|protein-coding	12.2165	12.2157	12.2443	12.2053	12.2217	0.00949619	0.816055	0.973806
NM_001081047	chr4	134228042	134238399	-	2444	1	Cnksr1|BC037758|-|4|4 D3|protein-coding	4.03982	4.03919	4.04305	4.06958	4.0567	0.811707	0.158819	0.60082
NM_008364	chr16	26581705	26717748	+	4563	1	Il1rap|6430709H04Rik|AI255955|AV239853|IL-1RAcP|-|16|16 B2|protein-coding	10.6032	10.5551	10.4562	10.4891	10.4835	-0.162044	0.00960047	0.0845121
NM_019740	chr10	42185786	42276742	-	2883	1	Foxo3|1110048B16Rik|2010203A17Rik|C76856|FKHRL1|Fkhr2|Foxo3a|-|10 B2|10 22.79 cM|protein-coding	9.94971	9.8772	10.3725	10.3534	10.3731	0.805308	3.22306e-29	2.49328e-27
NM_001077632	chr2	147177546	147186402	-	1349	1	Nkx2-2|Nkx-2.2|Nkx2.2|tinman|-|2 G2|2 72.63 cM|protein-coding	0	0	0	0	0	NA	1	1
NM_146883	chr9	37803889	37804936	+	1045	1	Olfr876|MOR161-1|-|9|9 A4|protein-coding	0	0	0	0	0	NA	1	1
NR_046042	chr4	73791244	73798378	+	685	1	Gm11240|OTTMUSG00000000286|-|4|4 C3|ncRNA	0	0	0	0	0	NA	1	1
NM_181415	chr19	57611034	58133340	+	6552	1	Atrnl1|AI504415|AW555641|Alp|Atrnl|Atrnlp|-|19|19 D2|protein-coding	11.5193	11.5372	11.4977	11.5568	11.5089	-0.00938807	0.849488	0.978688
NM_001271810	chrX	120290327	120910618	+	8598	1	Pcdh11x|PCDHX|PCDHX11|Pcdh11|-|X|X E2|protein-coding	0	0	0	0	0	NA	1	1
NM_146395	chr2	111257117	111258055	+	937	1	Olfr1276|MOR245-10|-|2|2 E3|protein-coding	0	0	0	0	0	NA	1	1
NM_207651	chr18	78146144	78596950	-	4021	1	Slc14a2|UT-A1|UT-A3|-|18|18 E3|protein-coding	0	0	0	0	0	NA	1	1
NR_045967	chr9	122382022	122398801	-	563	1	A730085K08Rik|-|-|9|9 F4|ncRNA	0.974004	0.980124	0.972689	0.970046	0.976763	-1.26307	0.424892	1
NM_001081452	chr10	77711446	77712009	+	561	1	Gm10024|ENSMUSG00000057573|-|10|10 C1|protein-coding	0	0	0	0	0	NA	1	1
NM_013900	chr16	31878810	31899019	+	4114	1	Mfi2|CD228|MTf|Meltf|-|16|16 B2|protein-coding	2.73785	2.74495	2.75236	2.74582	2.75424	1.13608	0.219218	0.688637
NM_001081448	chr10	130385800	130394241	-	2543	1	Vmn2r84|EG625068|-|10|10 D3|protein-coding	-1.86719	-1.86737	-1.86631	-1.86759	-1.86764	0.260813	0.95441	1
NM_008392	chr14	103047012	103056573	+	2581	1	Acod1|AI323667|CAD|Irg1|-|14 E2.3|14 51.67 cM|protein-coding	0	0	0	0	0	NA	1	1
NM_010596	chr7	45405960	45411382	+	3490	1	Kcna7|Kv1.7|-|7 B3|7 29.3 cM|protein-coding	1.21725	1.21325	1.2174	1.21389	1.21691	0.257707	0.854635	1
NM_010895	chr11	98325417	98329645	-	3133	1	Neurod2|Ndrf|bHLHa1|-|11 D|11 61.75 cM|protein-coding	0	0	0	0	0	NA	1	1
NR_033560	chr9	51839493	51875885	-	1480	1	Arhgap20os|9230115E21Rik|-|9|9 A5.3|ncRNA	0	0	0	0	0	NA	1	1
NM_198326	chr2	151494182	151511310	+	1475	1	Nsfl1c|Munc-18c|Stxbp3a|p47|-|2|2 G3|protein-coding	11.761	11.7275	11.8038	11.8043	11.8352	0.0944871	0.0372753	0.240742
NM_001113460	chr5	72755718	72868448	-	2640	1	Tec|-|-|5 C3.2|5 38.44 cM|protein-coding	5.05387	5.07235	5.09082	5.06878	5.07145	0.306723	0.426722	0.862349
NM_177469	chr7	139834174	139878088	+	4748	1	Adgra1|2900059M17Rik|D7Ertd680e|Gpr123|-|7 F4|7 84.89 cM|protein-coding	8.84946	8.90365	9.10065	9.08847	9.17672	0.624639	1.33122e-08	3.6215e-07
NM_027740	chr10	99107171	99197988	+	2713	1	Poc1b|4933430F16Rik|Wdr51b|-|10|10 C3-D1|protein-coding	8.03532	8.05458	8.13282	8.17788	8.12612	0.376391	0.00609006	0.058889
NM_010546	chr8	22659205	22706583	-	4511	1	Ikbkb|AI132552|IKK-2|IKK-beta|IKK2|IKK[b]|IKKbeta|-|8|8 A2|protein-coding	10.859	10.7945	10.8504	10.8164	10.8366	0.0127272	0.828289	0.976029
NM_177664	chr3	117319146	117360876	-	5680	1	Plppr4|A330086D10|D3Bwg0562e|Lppr4|PRG-1|mKIAA0455|-|3 G1|3 50.57 cM|protein-coding	0.625363	0.62683	0.624193	0.623481	0.626662	-0.558895	0.734018	1
NM_001166207	chr9	24557048	24696293	-	3417	1	Dpy19l2|4932443J21Rik|Gm18376|-|9|9 A4|protein-coding	0	0	0	0	0	NA	1	1
NM_207209	chr3	129983185	130060907	-	4676	1	Sec24b|AI605202|SEC24|-|3|3 G3|protein-coding	10.5953	10.474	10.4574	10.6405	10.5186	0.00991125	0.909422	0.988521
NM_001291167	chr7	64502138	64753876	+	3252	1	Apba2|X11-like|X11L|XllL|mXllL|-|7 C|7 34.65 cM|protein-coding	1.84785	1.85541	1.84756	1.8493	1.8433	-0.888468	0.421852	1
NM_183320	chrX	135373284	135383393	+	3829	1	Gm5128|4930481M05|EG331529|-|X F1|X|protein-coding	0	0	0	0	0	NA	1	1
NM_001310517	chr1	36423186	36445271	-	2279	1	Lman2l|A630028F14Rik|VIP36-like|VIPL|-|1|1 B|protein-coding	9.22575	9.264	9.23872	9.2301	9.21643	-0.0398233	0.66091	0.947523
NR_131057	chr8	117681622	117693198	+	3557	1	Gm38416|4732460I24|-|8|8 E1|ncRNA	0	0	0	0	0	NA	1	1
NM_001010840	chr10	24100843	24101951	-	1106	1	Taar8c|taR-8c|-|10|10 A4|protein-coding	0	0	0	0	0	NA	1	1
NM_011783	chr12	35992925	36004081	+	750	1	Agr2|Agr2h|Gob-4|HAG-2|XAG-2|mAG-2|-|12|12 A3|protein-coding	0	0	0	0	0	NA	1	1
NM_007892	chr3	14578671	14606309	+	1739	1	E2f5|AU024671|E2F-5|-|3|3 A1|protein-coding	10.3311	10.3685	10.2536	10.1844	10.2341	-0.212624	0.00192451	0.0220968
NR_106195	chr11	86656071	87483748	+	96	1	Mir8115|Gm28012|mmu-mir-8115|-|5|5 F|ncRNA	-1.26944	-1.26793	-1.26983	-1.26832	-1.27006	-1.12315	0.744474	1
NM_146281	chr15	98340022	98340939	-	916	1	Olfr284|MOR160-4|-|15|15 F1|protein-coding	0	0	0	0	0	NA	1	1
NM_001163394	chr12	108554720	108688515	+	2167	1	Evl|AI528774|-|12|12 F1|protein-coding	11.1279	11.0646	11.0056	11.0557	11.0985	-0.059491	0.321965	0.795925
NM_008023	chr19	16872316	16873830	-	1512	1	Foxb2|Fkh4|-|19 B|19 12.26 cM|protein-coding	0	0	0	0	0	NA	1	1
NM_021318	chr4	25199909	25242876	-	1097	1	Fhl5|1700027G07Rik|Act|-|4|4 A3|protein-coding	-1.86719	-1.86734	-1.86738	-1.86663	-1.86755	0.260813	0.95441	1
NR_029951	chr12	109590447	109590537	+	90	1	Mir431|Mirn431|mir-431|mmu-mir-431|-|12|12 F1|ncRNA	0	0	0	0	0	NA	1	1
NM_009256	chr13	33004541	33017955	+	3388	1	Serpinb9|BB283241|CAP-3|CAP3|PI-9|PI9|Spi6|ovalbumin|-|13 A3.2|13 13.79 cM|protein-coding	10.3416	10.3892	10.3276	10.3234	10.2634	-0.103018	0.132587	0.548047
NM_145579	chr7	18991245	19001766	+	2170	1	Mypop|Myodysa|P42pop|-|7|7 A3|protein-coding	8.3671	8.33423	8.41129	8.35502	8.35201	0.0719863	0.565817	0.929817
NM_025814	chr6	67266979	67289302	+	6675	1	Serbp1|1200009K13Rik|9330147J08Rik|AL022786|Pairbp1|-|6|6 C1|protein-coding	15.265	15.2968	15.3351	15.288	15.3279	0.0413094	0.188575	0.652907
NM_001036293	chr10	67266689	67285281	-	1783	1	Nrbf2|NRBF-2|-|10|10 B5.1|protein-coding	8.76458	8.76707	8.74166	8.80189	8.82076	0.0634594	0.565131	0.929787
NM_010294	chr5	97455161	97457008	-	1845	1	Gk2|GKTA|Gk-rs2|-|5 E3|5 47.71 cM|protein-coding	-1.26938	-1.26967	-1.26802	-1.26831	-1.26998	1.25621	0.719277	1
NM_019827	chr16	38089001	38246079	+	8285	1	Gsk3b|7330414F15Rik|8430431H08Rik|C86142|GSK-3|GSK-3beta|GSK3|-|16|16 B3|protein-coding	11.4487	11.3079	11.3283	11.4612	11.4194	0.0355316	0.605543	0.938965
NM_009257	chr1	106861180	106883348	+	2556	1	Serpinb5|1110036M19Rik|AI462524|AI646751|Maspin|PI-5|Spi7|ovalbumin|-|1|1 E2.1|protein-coding	-0.170025	-0.167934	-0.168142	-0.17047	-0.165598	0.702561	0.775728	1
NM_010463	chr15	102936853	102938517	+	840	1	Hoxc12|Hox-3.8|-|15 F3|15 58.01 cM|protein-coding	-1.26944	-1.26793	-1.26983	-1.26832	-1.27006	-1.12315	0.744474	1
NR_130743	chr3	57736062	57835425	+	3591	1	Rnf13|2010001H16Rik|Rzf|-|3|3 D|protein-coding	11.2324	11.2756	11.2027	11.1744	11.1859	-0.0960274	0.062384	0.343457
NM_134231	chr7	26611119	26612078	-	958	1	Vmn1r185|V1re12|-|7|7 A3|protein-coding	0	0	0	0	0	NA	1	1
NR_045401	chr18	60663410	60671624	+	3080	1	G630071F17Rik|G630071F17|-|18|18 D3|ncRNA	2.49067	2.48086	2.47291	2.47466	2.48414	-0.977295	0.285324	0.765973
NM_001025382	chr11	34314822	34422640	+	5365	1	Fam196b|EG574403|Gm6041|-|11 A4|11|protein-coding	0	0	0	0	0	NA	1	1
NM_198618	chr4	127169204	127237022	+	3870	1	Dlgap3|BC058433|DAP-3|DAP3|Prpl8|Sapap3|-|4 D2.2|4 61.33 cM|protein-coding	-0.822915	-0.825799	-0.825849	-0.82405	-0.824219	-0.480374	0.861153	1
NM_008752	chr2	23321246	23401973	+	2575	1	Nxph2|-|-|2|2 A3|protein-coding	0	0	0	0	0	NA	1	1
NM_013927	chr4	19280850	19510623	+	4688	1	Cngb3|CCNC2|CNG6|Cngbeta2|-|4|4 A3|protein-coding	0.0249596	0.0269899	0.0246514	0.0279338	0.029244	0.953506	0.684811	1
NM_009112	chr3	93555117	93564645	+	645	1	S100a10|42C|AA409961|AL024248|CAL12|CLP11|Cal1l|p10|p11|-|3 F2.1|3 40.51 cM|protein-coding	13.606	13.6871	13.9024	13.889	13.8976	0.293417	2.62275e-15	1.12437e-13
NM_016966	chr3	98313171	98339969	-	1857	1	Phgdh|3-PGDH|3PGDH|4930479N23|A10|PGAD|PGD|PGDH|SERA|-|3|3 F2.2|protein-coding	14.3206	14.3468	14.4261	14.3805	14.3588	0.0635757	0.067367	0.361422
NM_153171	chr1	144138667	144177372	-	1489	1	Rgs13|-|-|1 F|1 62.56 cM|protein-coding	0	0	0	0	0	NA	1	1
NM_001102613	chr7	24611328	24629297	+	2265	1	Phldb3|EG232970|ENSMUSG00000061511|Gm10102|-|7|7 A3|protein-coding	8.2936	8.29578	8.25297	8.27478	8.30188	-0.0585586	0.638719	0.943384
NM_001301334	chr5	87808121	87824421	+	737	1	Csn1s2b|AW987150|Csnd|Csne|-|5 E1|5 43.56 cM|protein-coding	0	0	0	0	0	NA	1	1
NM_178744	chr12	76370266	76388747	+	3983	1	Zbtb1|9430077A12|AI256369|Bsg2|C430003J21Rik|-|12|12 C3|protein-coding	11.0641	11.0778	10.9939	10.9509	10.9787	-0.141689	0.00861309	0.0774451
NM_021308	chr14	70372480	70429094	-	4888	1	Piwil2|Piwil1l|mili|-|14|14 D2|protein-coding	2.21058	2.20841	2.21652	2.21859	2.21223	1.10814	0.306226	0.781481
NR_037244	chr17	26948056	26948119	-	63	1	Mir3083|mir-3083|mmu-mir-3083|-|17 A3.3|17 13.6 cM|ncRNA	-1.32544	-1.32568	-1.32576	-1.3245	-1.32462	1.03725	0.781125	1
NM_007491	chr7	102096879	102100229	-	1707	1	Art5|ARTC5|Yac-2|-|7 E2|7 54.71 cM|protein-coding	0.916447	0.910202	0.91229	0.918784	0.912967	0.551572	0.74481	1
NM_001310551	chr2	86346724	86347764	-	1039	1	Olfr1055|MOR186-1|-|2|2 D|protein-coding	-1.86561	-1.86744	-1.86751	-1.86774	-1.86781	-2.30448	0.573731	1
NM_001252201	chr1	39900913	40026310	+	5548	1	Map4k4|9430080K19Rik|AU043147|AU045934|AW046177|HGK|Nik|-|1|1 B|protein-coding	13.0478	12.989	13.1433	13.1691	13.202	0.186438	2.59939e-06	5.27768e-05
NM_001347641	chr7	128439777	128461673	-	4446	1	Tial1|5330433G13Rik|AL033329|TIAR|mTIAR|-|7|7 F3|protein-coding	11.5607	11.5245	11.3953	11.4513	11.3923	-0.176397	0.000535818	0.00721739
NM_001270510	chrY	2900989	2912210	+	1569	1	Gm10256|ENSMUSG00000069031|-|Y A1|Y|protein-coding	0	0	0	0	0	NA	1	1
NM_010326	chr11	70639122	70642055	+	2725	1	Gp1ba|GPIba|GPIbalpha|-|11 B3|11 43.2 cM|protein-coding	4.63598	4.65339	4.62581	4.62875	4.61865	-0.561762	0.18168	0.643407
NR_028593	chr6	128438757	128503281	+	1484	1	Gm10069|ENSMUSG00000059659|-|6 F3|6|ncRNA	7.27082	7.21936	7.21679	7.20786	7.21898	-0.171401	0.336969	0.806618
NM_008361	chr2	129364578	129371139	-	1339	1	Il1b|IL-1beta|Il-1b|-|2 F1|2 62.97 cM|protein-coding	0	0	0	0	0	NA	1	1
NM_025828	chr13	55343833	55362783	-	4305	1	Lman2|1110003H06Rik|1300009F09Rik|AA408240|AL023023|AU040819|GP36B|VIP36|-|13|13 B1|protein-coding	12.6445	12.6578	12.6749	12.6454	12.6855	0.0214164	0.573605	0.93214
NM_008623	chr1	171150713	171161130	+	1990	1	Mpz|Mpp|P-zero|P0|-|1 H3|1 79.05 cM|protein-coding	0.144325	0.146378	0.148328	0.145545	0.147014	1.09728	0.611923	1
NM_147087	chr7	103097743	103098699	+	955	1	Olfr585|MOR14-4|-|7|7 E3|protein-coding	0	0	0	0	0	NA	1	1
NM_001163538	chr5	110259135	110269899	-	2071	1	Pgam5|2610528A17Rik|-|5|5 F|protein-coding	11.432	11.4558	11.46	11.4182	11.4328	-0.0106952	0.826958	0.975362
NM_144831	chr11	101732956	101767357	+	4293	1	Dhx8|Ddx8|mDEAH6|mKIAA4096|-|11|11 D|protein-coding	11.1661	11.0628	11.2312	11.2946	11.2383	0.20221	0.000705342	0.00921403
NM_008012	chr6	34354164	34368454	+	1292	1	Akr1b8|FR-1|Fgfrp|Fgrp|-|6 B1|6 14.91 cM|protein-coding	10.4413	10.461	10.4088	10.3385	10.4136	-0.104989	0.118505	0.515371
NM_009442	chr2	29060263	29087650	+	4139	1	Ttf1|AV245725|TTF-1|TTF-I|-|2|2 A3|protein-coding	10.2257	10.2335	10.2233	10.1939	10.1925	-0.0460281	0.491727	0.893517
NR_104378	chr4	22357543	22434091	+	3676	1	Fbxl4|AI836810|FBL4|FBL5|-|4|4 A3|protein-coding	10.0211	10.016	9.91038	9.92349	9.85446	-0.222304	0.00303707	0.0329838
NM_020021	chr4	3870658	3872105	-	1445	1	Mos|c-mos|-|4 A1|4 2.16 cM|protein-coding	0.718597	0.710938	0.705676	0.705288	0.707027	-3.83388	0.0375641	1
NM_181850	chr5	9485236	9725352	-	3528	1	Grm3|0710001G23Rik|Gprc1c|mGlu3|mGluR3|-|5|5 A1|protein-coding	0	0	0	0	0	NA	1	1
NM_011443	chr3	34649995	34652460	+	2463	1	Sox2|Sox-2|lcc|ysb|-|3 A3|3 16.93 cM|protein-coding	0	0	0	0	0	NA	1	1
NM_001163194	chr17	35649708	35650569	+	501	1	Sfta2|EG433102|-|17|17 B1|protein-coding	-1.86719	-1.86617	-1.86745	-1.86762	-1.86768	-2.07879	0.647706	1
NM_178681	chr12	37880705	38633410	+	5517	1	Dgkb|6430574F24|90kda|C630029D13Rik|DAGK2|DGK|DGK-beta|mKIAA0718|-|12|12 A3|protein-coding	-1.86719	-1.86617	-1.86745	-1.86762	-1.86768	-2.07879	0.647706	1
NM_007497	chr15	100227859	100261248	+	2320	1	Atf1|-|-|15|15 F1|protein-coding	10.942	10.9478	10.9161	10.9334	10.963	-0.0101061	0.855458	0.980015
NM_026521	chr15	36997027	37007402	-	4411	1	Zfp706|3110006P09Rik|AA793007|AW536850|C77232|Znf706|-|15|15 B3.1|protein-coding	12.342	12.384	12.3669	12.3865	12.4067	0.0293425	0.474111	0.883583
NM_001025384	chrX	73117047	73129260	+	2855	2	DXBay18|-|-|X|X A7.3|protein-coding	0	0	0	0	0	NA	1	1
NM_008114	chr2	28609450	28621982	-	1714	1	Gfi1b|Gfi-1B|-|2|2 A3|protein-coding	-1.86719	-1.86733	-1.86737	-1.86748	-1.86672	0.260813	0.95441	1
NM_001172112	chr11	60830631	60858423	+	1573	1	Dhrs7b|BC003479|C79874|C80074|PexRAP|-|11|11 B2|protein-coding	10.3925	10.3805	10.3682	10.3761	10.3899	-0.0130344	0.837277	0.976797
NM_016985	chrX	71364760	71419196	+	4617	1	Mtmr1|AW049210|-|X|X A7.3|protein-coding	10.9595	10.9201	10.9537	10.9172	10.9342	-0.00645057	0.90784	0.988406
NM_001303431	chr5	88455991	88468529	+	1904	1	Ambn|-|-|5 E1|5 43.63 cM|protein-coding	0	0	0	0	0	NA	1	1
NM_176840	chr16	33185071	33243312	+	4506	1	Osbpl11|9430097N02Rik|AI132306|AU019795|ORP-11|-|16|16 B3|protein-coding	11.6691	11.6055	11.6695	11.6581	11.6284	0.0204716	0.675554	0.950895
NM_173382	chr3	53463817	53481755	+	4306	1	Proser1|2810046L04Rik|9330161F11|-|3|3 C|protein-coding	7.51941	7.45181	7.43918	7.52582	7.47563	-0.0243371	0.8938	0.986768
NR_046233	chr17	39842997	39848829	+	5832	1	Rn45s|-|-|-|rRNA	23.6946	18.9947	19.2846	19.5736	19.2106	-3.87603	0.000179361	0.00269373
NM_010954	chr16	81200697	81597805	+	4875	1	Ncam2|Ncam-2|Ocam|RNCAM|-|16 C3.3|16 45.89 cM|protein-coding	1.27379	1.27743	1.28127	1.27142	1.27286	-0.127057	0.928434	1
NM_133710	chr9	118926536	119044119	+	4617	1	Ctdspl|2810418J22Rik|AI426263|HYA22|SCP3|-|9|9 F3|protein-coding	10.154	10.1964	10.2462	10.2887	10.2329	0.137223	0.0499018	0.294917
NM_080849	chr11	78166106	78176666	-	2783	1	Nek8|4632401F23Rik|b2b1449Clo|jck|-|11 B5|11 46.74 cM|protein-coding	7.98484	8.02317	7.97189	7.93526	7.91235	-0.248069	0.0774386	0.395534
NM_026368	chr4	94500079	94556796	-	2101	1	Caap1|5830433M19Rik|AI536248|CAAP|-|4|4 C5|protein-coding	8.70071	8.76	8.70056	8.65013	8.68447	-0.147235	0.184636	0.647213
NM_178645	chr11	76945656	76987389	+	2341	1	Blmh|AI035728|Bh|Bmh|-|11|11 B5|protein-coding	12.075	12.0562	12.1001	12.0556	12.098	0.0248762	0.564043	0.929699
NR_136916	chr6	83793352	83794270	-	918	1	Gm7443|EG665004|-|6|6 C3|pseudo	1.3279	1.32911	1.33305	1.33277	1.32524	0.537836	0.706722	1
NM_001081648	chrX	148180724	148224710	+	2019	1	Gm15107|OTTMUSG00000019001|Ott-like|-|X F2|X|protein-coding	8.03566	8.05821	8.06915	8.03326	8.03436	-0.0072436	0.957181	0.992083
NM_007661	chr4	155624869	155649932	+	2567	1	Cdk11b|AA989746|CDK11-p110|CDK11-p46|CDK11-p58|Cdc11b|Cdc2l1|Cdc2l2|Cdk11|p58|-|4 E2|4 86.73 cM|protein-coding	10.1941	10.1653	10.0999	10.1261	10.2002	-0.0617035	0.412081	0.854742
NM_172749	chr7	127877701	127885996	+	6305	1	Zfp646|6820429M01|-|7|7 F3|protein-coding	11.0533	11.0259	11.0162	11.0532	11.0182	-0.0139551	0.79688	0.973682
NR_105951	chr19	4263818	4263878	-	60	1	Mir6985|Gm27719|mmu-mir-6985|-|19|19 A|ncRNA	0.532369	0.528518	0.528256	0.529421	0.527318	-0.930944	0.57897	1
NM_146288	chr17	37768642	37772620	+	1027	1	Olfr122|MOR263-10|-|17|17 B1|protein-coding	0	0	0	0	0	NA	1	1
NM_146103	chr1	119526154	119528983	+	2827	1	Tmem185b|2500001K11Rik|-|1|1 E2.3|protein-coding	8.89176	8.86463	8.94517	8.95424	8.94988	0.186108	0.0642471	0.351397
NM_146845	chr2	86922583	86923530	-	946	1	Olfr1098|MOR206-1|-|2|2 D|protein-coding	0	0	0	0	0	NA	1	1
NM_001310055	chr8	70139499	70167488	+	1538	1	2310045n01rik-mef2b|-|-|8 B3.3|protein-coding	6.12723	6.11046	6.14487	6.14122	6.13268	0.234257	0.365584	0.824489
NM_177603	chr19	41845976	41848132	-	2154	1	Frat2|-|-|19 C3|19 35.33 cM|protein-coding	5.689	5.67469	5.66929	5.67649	5.67535	-0.115322	0.696792	0.955553
NM_201608	chr17	36365004	36368417	-	1584	1	H2-M10.3|5.3H|-|17 B1|17 19.01 cM|protein-coding	-1.86719	-1.86737	-1.86631	-1.86759	-1.86764	0.260813	0.95441	1
NM_027137	chr3	92685499	92687210	-	674	1	Lce1d|2310037L11Rik|AI415320|Sprrl7|-|3|3 F1|protein-coding	-1.86719	-1.86737	-1.86631	-1.86759	-1.86764	0.260813	0.95441	1
NM_001253832	chr19	5460607	5465052	+	1228	1	Fibp|2010004G08Rik|2010005N21Rik|3010027N18Rik|-|19|19 A|protein-coding	9.95544	9.99069	9.92408	9.92214	10.0096	-0.0372461	0.638341	0.943384
NM_175486	chr9	107340640	107349683	+	2544	1	6430571L13Rik|-|-|9|9 F1|protein-coding	4.29365	4.31684	4.29307	4.32263	4.30605	0.0721413	0.890652	0.986152
NM_183224	chr3	104767405	104777547	-	4308	1	Fam19a3|7530404M11Rik|TAFA3|Tafa-3|-|3|3 F2.2|protein-coding	-1.86719	-1.86737	-1.86631	-1.86759	-1.86764	0.260813	0.95441	1
NM_001101478	chr3	36151080	36170341	+	6619	1	D3Ertd254e|-|-|3 B|3 17.41 cM|protein-coding	10.8893	10.8988	10.8972	10.9101	10.878	0.00116049	0.983283	0.996446
NM_033526	chr3	88553716	88569725	+	3359	1	Ubqln4|A1Up|A1u|AI663987|CIP75|UBIN|-|3|3 F1|protein-coding	11.9807	12.0165	11.978	11.9516	11.9727	-0.0417642	0.332253	0.803653
NM_001127346	chr13	108052589	108158625	-	674	1	Ndufaf2|1810058I14Rik|C86051|Ndufa12l|mimitin|-|13|13 D2.1|protein-coding	8.29991	8.34645	8.29644	8.30938	8.32032	-0.049676	0.687324	0.952383
NM_030224	chr11	82892145	82900737	+	2075	1	Fndc8|4930466G16Rik|-|11|11 C|protein-coding	4.99518	4.98978	4.96421	4.99749	4.9901	-0.187517	0.634986	0.943384
NM_001289661	chr6	149309414	149335663	+	6141	1	2810474O19Rik|6720435I21Rik|AA536804|AU020969|GET|Kiaa1551|-|6|6 G3|protein-coding	12.2773	12.271	12.8323	12.9264	12.8401	0.74027	2.53371e-58	3.30983e-56
NM_028874	chr9	30427329	30466726	+	5528	1	Snx19|3526401K03Rik|AI195321|AI848208|mKIAA0254|-|9|9 A4|protein-coding	9.28104	9.27021	9.29708	9.29924	9.2626	0.0239591	0.789739	0.97294
NM_007798	chr14	63122462	63145923	+	4731	1	Ctsb|CB|-|14 D1|14 33.24 cM|protein-coding	13.1374	13.1665	13.1291	13.1386	13.1366	-0.0212765	0.533926	0.916501
NM_009430	chr6	41521776	41525079	+	819	1	Prss2|TRY8|TRYP|Ta|Tesp4|Try2|-|6|6 B1|protein-coding	-1.26938	-1.26967	-1.26802	-1.26831	-1.26998	1.25621	0.719277	1
NM_147053	chr7	103041481	103042440	+	958	1	Olfr582|MOR30-3|-|7|7 E3|protein-coding	0	0	0	0	0	NA	1	1
NM_019998	chr4	47469833	47474367	-	3051	1	Alg2|1110018A23Rik|1300013N08Rik|ALPG2|CDGIi|MNCb-5081|-|4|4 B1|protein-coding	9.97521	9.93919	9.94026	10.0292	9.97621	0.0479114	0.536651	0.918429
NM_001316684	chr15	78899768	78912052	+	2495	1	Sh3bp1|3BP-1|-|15|15 E1|protein-coding	9.90739	9.84151	9.79139	9.77979	9.77319	-0.173919	0.0240326	0.174048
NM_008987	chr3	66219887	66225806	+	1917	1	Ptx3|AI607804|TSG-14|-|3 E1|3 30.25 cM|protein-coding	9.31308	9.29196	9.02539	9.14072	9.08477	-0.492842	1.36269e-06	2.87202e-05
NM_007460	chr10	80706978	80742211	-	4697	1	Ap3d1|AA407035|Ap3d|Bolvr|mBLVR1|mh|mocha|-|10 C1|10 39.72 cM|protein-coding	12.5593	12.5096	12.4904	12.4715	12.5007	-0.0577909	0.148485	0.5808
NM_198650	chr19	5970234	5986143	-	1885	1	Slc22a20|Gm963|OAT1-L|mOAT6|-|19|19 A|protein-coding	-1.86719	-1.86733	-1.86737	-1.86748	-1.86672	0.260813	0.95441	1
NM_001034866	chr17	12888902	12910000	-	1668	1	Pnldc1|Gm313|-|17|17 A1|protein-coding	3.23093	3.21874	3.21016	3.22091	3.2153	-0.659669	0.342428	0.809992
NM_207659	chr8	26021421	26119224	-	12812	1	Hook3|5830454D03Rik|AI317159|E330005F07Rik|-|8|8 A2|protein-coding	11.8082	11.7772	11.7646	11.7666	11.71	-0.0602139	0.204996	0.67239
NM_001126322	chr11	99771714	99772913	-	1197	1	Gm11595|OTTMUSG00000002543|-|11|11 D|protein-coding	0	0	0	0	0	NA	1	1
NM_028299	chr8	60890451	60907572	+	1173	1	Hpf1|2700029M09Rik|C230006B22Rik|C4orf27|-|8|8 B3.1|protein-coding	10.3762	10.4292	10.3679	10.3401	10.3994	-0.0567538	0.396665	0.845065
NM_001085544	chrX	77864758	77870033	+	791	1	Gm14744|OBP1|OBP2|OTTMUSG00000017866|Obp1f|-|X|X B|protein-coding	0	0	0	0	0	NA	1	1
NM_001134675	chr4	60066469	60070475	-	1024	1	Mup7|Gm12546|Mup3|OTTMUSG00000007428|-|4 B3|4|protein-coding	0	0	0	0	0	NA	1	1
NM_025699	chr2	163405822	163419470	-	1556	1	Oser1|3230401D17Rik|AI256769|Perit1|-|2|2 H3|protein-coding	10.3719	10.3741	10.42	10.401	10.4497	0.0836889	0.195366	0.662561
NM_175402	chr9	106883985	106887000	-	3013	1	Rbm15b|1810017N16Rik|-|9|9 F1|protein-coding	11.0607	11.0276	11.0899	11.0614	11.0586	0.0379456	0.479897	0.887109
NM_008763	chr1	172956768	172957817	+	1047	1	Olfr16|MOR23|MOR26713|-|1|1 H3|protein-coding	0	0	0	0	0	NA	1	1
NM_011313	chr3	90612894	90614414	+	714	1	S100a6|2A9|5B10|CALCYCLIN|Cacy|PRA|-|3 F1|3 39.35 cM|protein-coding	14.8859	14.9554	14.9628	14.9691	15.0093	0.0683058	0.0539892	0.310977
NR_106189	chr8	85700905	85701021	+	116	1	Mir8109|Gm27495|mmu-mir-8109|-|8|8 C3|ncRNA	-0.416134	-0.41403	-0.414229	-0.41477	-0.414938	0.350508	0.885158	1
NM_011240	chr10	58446852	58494154	+	9445	1	Ranbp2|A430087B05Rik|AI256741|NUP358|-|10 B4|10 29.34 cM|protein-coding	13.5278	13.4992	13.4919	13.558	13.4522	-0.0142637	0.736905	0.964134
NR_046011	chr6	72438683	72440615	+	1932	1	Particl|4930414L22Rik|AI449819|-|6 C1|6|ncRNA	9.57039	9.6007	9.6228	9.68278	9.6781	0.153093	0.0662447	0.358099
NR_045467	chr8	77624172	77628956	+	355	1	1700092C02Rik|-|-|8|8 C1|ncRNA	0	0	0	0	0	NA	1	1
NR_110499	chr7	45324958	45325651	+	693	1	Rpl14-ps1|ENSMUSG00000046721|Gm9811|-|7 B3|7|pseudo	7.53213	7.53612	7.49101	7.33004	7.43441	-0.546263	0.00999273	0.0872442
NM_011197	chr3	101040236	101110166	-	5775	1	Ptgfrn|4833445A08Rik|AU042434|CD9P-1|FPRP|Trim45|-|3|3 F2.2|protein-coding	12.7027	12.7111	12.7398	12.7114	12.7145	0.0180665	0.623908	0.942432
NM_146525	chr9	19374941	19375879	-	937	1	Olfr847|MOR149-2|-|9|9 A2|protein-coding	0	0	0	0	0	NA	1	1
NM_008379	chr11	97159710	97187892	-	5885	1	Kpnb1|AA409963|IPOB|Impnb|-|11|11 D|protein-coding	15.0134	15.0297	15.0198	15.0043	15.0085	-0.0124881	0.654232	0.946758
NM_001164284	chr5	93635185	93671463	-	2711	1	C87414|-|-|5|5 E2|protein-coding	0	0	0	0	0	NA	1	1
NM_175383	chr19	5038826	5041134	+	2031	1	B4gat1|1500032M01Rik|B3gnt1|B3gnt6|BETA3GNT1|iGAT|iGNT|-|19|19 A|protein-coding	10.0426	10.0195	9.99947	9.931	9.99373	-0.100554	0.17853	0.63683
NM_001283046	chr2	31688537	31804362	+	7353	1	Abl1|AI325092|Abl|E430008G22Rik|c-Abl|-|2 21.86 cM|2 B|protein-coding	12.145	12.1075	12.1099	12.1295	12.1456	0.00402492	0.924306	0.990382
NM_080636	chr18	36783209	36792560	+	3118	1	Hars2|4631412B19Rik|HARSR|HO3|Harsl|-|18|18 B2|protein-coding	9.76761	9.83763	9.80088	9.80995	9.7872	-0.00983739	0.900036	0.987778
NM_028671	chrX	53273433	53301501	+	726	1	Fam122c|4930432H15Rik|4930527G05Rik|-|X|X A5|protein-coding	0	0	0	0	0	NA	1	1
NR_028384	chr4	21846327	21848448	-	2121	1	4930528A17Rik|-|-|4|4 A3|ncRNA	7.00926	6.99906	6.96245	7.02395	7.00755	-0.0361185	0.856264	0.980015
NM_178363	chr12	84996321	85074533	+	11029	1	Ylpm1|A930013E17Rik|ZAP|Zap3|-|12|12 D1|protein-coding	10.7888	10.6662	10.7052	10.8236	10.657	0.00390969	0.961776	0.992707
NR_024025	chr9	13749181	13806481	+	3106	1	Mtmr2|6030445P13Rik|-|9|9 A1|protein-coding	12.4146	12.4696	12.4978	12.4198	12.4602	0.020215	0.651924	0.946189
NM_146649	chr2	88005817	88006776	-	958	1	Olfr1160|MOR173-1|-|2|2 D|protein-coding	0	0	0	0	0	NA	1	1
NM_018781	chr14	70077445	70082613	+	3868	1	Egr3|Pilot|-|14|14 D2|protein-coding	5.26294	5.24287	5.24896	5.26655	5.25625	0.0876041	0.803447	0.973682
NM_001105156	chr7	9976245	9992139	-	2552	1	Vmn2r49|-|-|7|7 A1|protein-coding	0	0	0	0	0	NA	1	1
NM_001172092	chr3	159495433	159529955	+	3309	1	Depdc1a|5830484J08Rik|Depdc1|-|3|3 H4|protein-coding	11.0274	11.0833	10.9503	10.9158	10.8711	-0.212357	0.000306899	0.00439011
NR_045069	chr15	79742698	79757394	+	5400	1	Gm16576|-|-|15 E1|15 37.85 cM|ncRNA	5.32349	5.31343	5.33793	5.33938	5.32396	0.290321	0.398628	0.845942
NM_026684	chr17	24722067	24724388	-	629	1	Ndufb10|0610011B04Rik|22kDa|PDSW|-|17|17 A3.3|protein-coding	11.3596	11.3607	11.3732	11.3754	11.3896	0.0270373	0.576471	0.932958
NM_177640	chr19	18713236	18718428	+	1627	1	D030056L22Rik|-|-|19|19 B|protein-coding	10.5243	10.5585	10.4774	10.4437	10.3882	-0.170278	0.0108079	0.0932333
NM_001317388	chr9	20770057	20815067	-	6040	1	Col5a3|-|-|9|9 A3|protein-coding	11.9759	11.9275	11.7666	11.7607	11.7393	-0.257557	1.0704e-08	2.93502e-07
NM_001045529	chr16	93832121	93876073	+	4160	1	Morc3|1110051N18Rik|AI452146|BF318192|D16Jhu32e|NXP2|Zcwcc3|-|16|16 C4|protein-coding	11.37	11.3627	11.384	11.362	11.3427	-0.00510672	0.917809	0.989415
NM_144929	chr8	84946991	84956603	+	1900	1	Rtbdn|A330096I21Rik|BC022744|Rtbnd|-|8|8 C3|protein-coding	1.7485	1.75137	1.75053	1.74825	1.74583	-0.352959	0.754777	1
NM_144787	chr4	74251879	74405864	+	4233	1	Kdm4c|2410141F18Rik|AA517467|Gasc1|Jmjd2c|-|4|4 C3|protein-coding	11.2644	11.2705	11.1554	11.1743	11.1292	-0.162879	0.00157982	0.0187132
NM_001145960	chr9	37229149	37255738	-	4415	1	Slc37a2|G3PP|Slc37a1|cI-2|ci2|-|9|9 A4|protein-coding	9.48789	9.52794	9.4146	9.42226	9.36212	-0.229505	0.00847075	0.0765629
NM_027256	chr7	97480956	97541398	+	3219	1	Ints4|2610034N24Rik|AA692684|AW493223|-|7|7 E1|protein-coding	11.3398	11.3637	11.3352	11.3294	11.3139	-0.0368426	0.453731	0.876141
NR_036602	chr4	33027139	33031323	-	3848	1	4933421O10Rik|-|-|4 14.61 cM|4 A5|ncRNA	8.83744	8.76579	8.76138	8.84616	8.86626	0.0657753	0.577219	0.933188
NM_177376	chr2	70039126	70429195	+	6219	1	Myo3b|A430065P19Rik|-|2|2 C2|protein-coding	-1.30565	-1.30803	-1.30813	-1.30839	-1.30658	-1.30728	0.688413	1
NM_028804	chr2	5137776	5230866	+	2653	1	Ccdc3|2310045O21Rik|-|2|2 A1|protein-coding	0.225739	0.225467	0.227499	0.230335	0.229911	2.9	0.192806	1
NM_001243792	chr1	187609006	188214884	+	5344	1	Esrrg|ERR3|Errg|NR3B3|mKIAA0832|-|1|1 H5-H6|protein-coding	-1.86719	-1.86737	-1.86631	-1.86759	-1.86764	0.260813	0.95441	1
NM_001081971	chr2	118699103	118703963	-	4858	1	Ankrd63|Gm1337|-|2|2 E5|protein-coding	0	0	0	0	0	NA	1	1
NM_022992	chr6	97210792	97233315	+	1334	1	Arl6ip5|5930404D22Rik|AV001879|Aip-5|Gtrap3-18|addiscin|-|6|6 D3|protein-coding	12.1137	12.1617	12.1509	12.1672	12.2235	0.0548711	0.236006	0.712752
NM_025312	chr12	36314169	36318452	+	1747	1	Sostdc1|0610006G05Rik|Sostl|USAG-1|Wise|ectodin|-|12|12 A3|protein-coding	-1.86719	-1.86617	-1.86745	-1.86762	-1.86768	-2.07879	0.647706	1
NM_133352	chr19	41210842	41264004	-	6127	1	Tm9sf3|1810073M23Rik|2810031D16Rik|AI115521|AI413748|AW146116|AW549777|Smbp|mKIAA4036|-|19|19 C3|protein-coding	14.0402	14.0909	14.0745	14.0385	14.0404	-0.0178089	0.601779	0.938011
NR_131212	chr19	5824710	5845478	-	20768	1	Neat1|2310043N10Rik|VINC|-|19|19 A|ncRNA	14.7258	14.5287	14.6834	14.8229	14.8182	0.16823	0.119249	0.51667
NM_001004149	chr13	99184823	99247032	+	2751	1	Zfp366|DC-SCRIPT|Znf366|-|13|13 D1|protein-coding	0	0	0	0	0	NA	1	1
NM_013929	chr12	112644828	112649152	+	776	1	Siva1|CD27bp|Siva|-|12|12 F1|protein-coding	10.6692	10.6766	10.7531	10.6821	10.7009	0.0597174	0.331114	0.803107
NM_177190	chr2	104679980	104712162	-	3500	1	Tcp11l1|C130096D04Rik|-|2|2 E2|protein-coding	9.26306	9.28673	9.44119	9.56014	9.45788	0.46776	2.59091e-06	5.26819e-05
NM_028873	chr10	128805676	128819446	+	4220	1	Dnajc14|5730551F12Rik|DNAJ|DRIP78|HDJ3|LIP6|-|10|10 D3|protein-coding	11.9101	11.9496	11.9668	11.9567	11.97	0.0440647	0.307592	0.783379
NR_037981	chr14	46379524	46383606	+	670	1	Gm15217|OTTMUSG00000019524|-|14|14 C1|ncRNA	0	0	0	0	0	NA	1	1
NM_175025	chr9	105411362	105495133	-	4842	1	Atp2c1|1700121J11Rik|ATP2C1A|AW061228|BCPM|D930003G21Rik|HHD|SPCA|pmr1|-|9|9 F1|protein-coding	12.0113	12.0611	11.995	11.9607	11.9647	-0.0832772	0.0589869	0.330819
NM_019443	chrX	37187589	37191238	-	488	1	Ndufa1|1810049F12Rik|MWFE|-|X|X A3.3|protein-coding	10.4826	10.4735	10.4488	10.4427	10.4877	-0.028367	0.653689	0.946616
NM_020001	chr6	123229843	123247024	+	1237	1	Clec4n|Clec6a|Clecsf10|Nkcl|-|6 F2|6 58.3 cM|protein-coding	0	0	0	0	0	NA	1	1
NM_021287	chr19	4711223	4752352	+	8196	1	Sptbn2|Spnb3|mKIAA0302|-|19 A|19 4.1 cM|protein-coding	5.70521	5.68551	5.70766	5.71029	5.70534	0.183827	0.539246	0.919448
NM_001166024	chr2	91265115	91277371	+	3390	1	Arfgap2|2310032E02Rik|Zfp289|-|2|2 E1|protein-coding	11.4297	11.4643	11.5016	11.4997	11.506	0.0749714	0.116315	0.509733
NM_175548	chr16	41533342	42146213	+	2459	1	Lsamp|5430428I19|AW046674|B130007O04Rik|D930023J12Rik|Lam|Lamp|-|16|16 B4|protein-coding	0	0	0	0	0	NA	1	1
NM_207560	chr9	38848116	38849042	+	925	1	Olfr924|MOR171-27P|MOR171-47|Olfr1520-ps1|-|9|9 A5.1|protein-coding	0	0	0	0	0	NA	1	1
NM_013742	chr7	143557230	143600090	-	3197	1	Cars|CA3|-|7 F5|7 88.25 cM|protein-coding	12.7052	12.6748	12.6702	12.6417	12.6187	-0.0573767	0.144743	0.574452
NM_008703	chr10	14760289	14770556	+	1169	1	Nmbr|BB182387|-|10|10 A2|protein-coding	0.567798	0.56392	0.565951	0.562927	0.5627	-0.87284	0.601384	1
NM_001100455	chr2	25777017	25780279	+	644	1	Lcn11|Gm109|-|2|2 A3|protein-coding	0	0	0	0	0	NA	1	1
NM_172400	chr4	132535559	132553742	+	1381	1	Dnajc8|1110021D09Rik|2010009J04Rik|AL024084|AU019262|AU044514|-|4|4 D2.3|protein-coding	11.8502	11.8273	11.8346	11.8435	11.8718	0.0159632	0.719868	0.961907
NM_001166850	chr7	20668918	20669841	+	922	5	Vmn1r165|Gm4579|-|7 A3|7|protein-coding	0	0	0	0	0	NA	1	1
NR_030548	chrX	52742331	52742413	-	82	1	Mir18b|Mirn18b|mir-18b|mmu-mir-18b|-|X A5|X|ncRNA	0	0	0	0	0	NA	1	1
NM_008950	chr11	106256185	106263112	+	1264	1	Psmc5|mSUG1|-|11|11 E1|protein-coding	11.9873	11.9242	12.008	12.0166	12.0547	0.0935917	0.0424979	0.26448
NM_054070	chr8	123477862	123503916	+	4249	1	Afg3l1|1700047G05Rik|3110061K15Rik|-|8|8 E1|protein-coding	10.8794	10.8111	10.8956	10.8843	10.9622	0.105556	0.0902146	0.437549
NR_045366	chr18	64157724	64277180	-	658	1	St8sia3os|1700091E21Rik|-|18|18 E1|ncRNA	0	0	0	0	0	NA	1	1
NM_029735	chr1	185363095	185428355	+	4816	1	Eprs|2410081F06Rik|3010002K18Rik|C79379|Qprs|-|1|1 H5|protein-coding	14.8559	14.8374	14.8246	14.8402	14.7825	-0.0354049	0.275372	0.756886
NM_027409	chrX	53344594	53370559	-	2239	1	Mospd1|1810018L05Rik|-|X|X A5|protein-coding	9.18757	9.16053	9.17063	9.17633	9.1587	-0.0119078	0.897232	0.986972
NR_046155	chr8	123557488	123557608	-	120	10	Gm23284|Rn5s31|-|8 E1|8|rRNA	0	0	0	0	0	NA	1	1
NM_026603	chr5	123907275	123928832	+	2226	1	Denr|1500003K04Rik|-|5|5 F|protein-coding	11.7546	11.7678	11.7795	11.7714	11.82	0.0389356	0.397058	0.845065
NM_007815	chr19	39287085	39330713	+	1775	1	Cyp2c29|AHOH|AHOHase|AI159681|AI196010|Ah-2|Ahh-1|Cyp2c|P450-2C|-|19 C3|19 33.91 cM|protein-coding	0	0	0	0	0	NA	1	1
NM_175133	chr10	75506814	75517381	-	2961	1	Gucd1|1110038D17Rik|-|10|10 C1|protein-coding	10.3337	10.3268	10.4337	10.3707	10.3975	0.116403	0.0791057	0.40109
NM_001162908	chr10	41810574	41908436	+	3170	1	Sesn1|1110002G11Rik|AU044290|Pa26|Sest1|-|10 B2|10 22.77 cM|protein-coding	9.47201	9.47222	9.75996	9.75653	9.75325	0.582027	9.13454e-13	3.40933e-11
NM_010773	chr18	70568292	70626131	+	1841	1	Mbd2|MBD2a|-|18 E2|18 44.54 cM|protein-coding	11.6118	11.6221	11.6025	11.584	11.6001	-0.0293692	0.521013	0.909655
NM_145076	chr6	37870811	37968445	+	6170	1	Trim24|A130082H20Rik|AI447469|D430004I05Rik|TIF1|TIF1-alpha|TIF1alpha|Tif1a|-|6|6 B1|protein-coding	10.8893	10.9698	11.4604	11.497	11.4561	0.773967	8.10078e-42	8.12837e-40
NM_032396	chr11	5191553	5261610	-	4896	1	Kremen1|AV002070|Kremen|Krm1|-|11|11 A1|protein-coding	11.0074	10.9901	11.171	11.1472	11.0981	0.203763	0.000302288	0.00433916
NM_001104580	chr17	23384803	23401864	+	2564	1	Vmn2r116|EG619697|V2Rp5|-|17|17 A3.3|protein-coding	0	0	0	0	0	NA	1	1
NR_015537	chr5	52190681	52197984	+	2114	1	9230114K14Rik|-|-|5|5 C1|ncRNA	5.57232	5.56565	5.57329	5.54959	5.57554	-0.0431303	0.890978	0.986197
NM_175522	chr5	139907943	139974724	+	3830	1	Elfn1|A930017N06Rik|AI197272|Ppp1r28|-|5|5 G2|protein-coding	3.74847	3.75324	3.77004	3.75209	3.7408	0.184496	0.768005	0.969756
NM_198635	chr10	75954514	76009589	+	2820	1	Gm5134|EG333669|-|10 C1|10|protein-coding	0	0	0	0	0	NA	1	1
NR_038052	chr4	156331103	156339499	+	2559	1	Vmn2r-ps159|V2r8|V2r9|Vmn2r-ps160|-|4|4 E2|pseudo	-1.86719	-1.86737	-1.86631	-1.86759	-1.86764	0.260813	0.95441	1
NM_145825	chr3	37308627	37312446	-	1052	1	Cetn4|-|-|3|3 B|protein-coding	6.17771	6.17804	6.18735	6.16723	6.23545	0.207599	0.451463	0.874785
NM_028450	chr1	44551671	44796836	+	2963	1	Gulp1|3110030A04Rik|5730529O06Rik|CED-6|Ced6|GULP|Gulp-2|-|1|1 C1.1|protein-coding	11.5869	11.6225	11.5972	11.5453	11.5437	-0.0593741	0.226117	0.699988
NM_028603	chr4	129353632	129378028	-	2222	1	Zbtb8a|2410081M15Rik|AI480941|-|4|4 D2.2|protein-coding	8.35737	8.31863	8.35221	8.33122	8.32454	-0.00586077	0.961809	0.992707
NR_104093	chr9	70012548	70022866	+	1028	1	Gtf2a2|TFIIA-gamma|TfIIg|Tfiia2|-|9|9 D|protein-coding	10.6662	10.7563	10.7656	10.7192	10.756	0.0510741	0.420803	0.858152
NR_045703	chr19	7383003	7383557	+	554	1	1700105P06Rik|-|-|19|19 A|ncRNA	2.83632	2.83536	2.84951	2.8438	2.8387	0.895395	0.296057	0.773635
NM_021400	chr1	150449412	150466165	-	4263	1	Prg4|CACP|DOL54|JCAP|MSF|SZP|lubricin|-|1|1 G1|protein-coding	8.63527	8.61546	8.595	8.61087	8.56834	-0.0972667	0.38372	0.834874
NM_028013	chr9	14353990	14381242	-	4466	1	Endod1|2210414F18Rik|2310067E08Rik|C85344|-|9|9 A1|protein-coding	10.7659	10.7664	10.687	10.7009	10.7724	-0.068502	0.274437	0.756886
NR_132655	chr2	26503927	26505346	+	1084	1	Gm35978|-|-|2 A3|2|ncRNA	1.83631	1.8494	1.84392	1.84343	1.84093	-0.0268527	0.982247	1
NR_106088	chr5	113324493	113324545	-	52	1	Mir7229|mmu-mir-7229|-|5|5 F|ncRNA	0	0	0	0	0	NA	1	1
NM_001081656	chr17	26414965	26446342	+	6181	1	Neurl1b|C230078M08Rik|EG240055|-|17 A3.3|17|protein-coding	11.5281	11.5572	11.5148	11.5741	11.5335	-0.00251829	0.959329	0.992083
NM_017370	chr8	109575128	109579172	-	1338	1	Hp|HP-1|preHP2|-|8 D3|8 57.11 cM|protein-coding	0.884175	0.882657	0.882217	0.877272	0.882384	-0.970933	0.536051	1
NM_172907	chr7	107567433	107591365	+	1964	1	Olfml1|6720478C22|AV321997|BC047207|MVAL564|ONT2|mONT2|-|7|7 E3|protein-coding	-1.86719	-1.86617	-1.86745	-1.86762	-1.86768	-2.07879	0.647706	1
NM_146542	chr13	21638580	21639521	-	940	1	Olfr11|M49|MOR256-11|ORL121|-|13 A3.1|13 7.9 cM|protein-coding	0	0	0	0	0	NA	1	1
NR_106020	chr7	44538106	44538178	-	72	1	Mir7053|Gm27503|mmu-mir-7053|-|7|7 B3|ncRNA	1.6881	1.68391	1.69235	1.68792	1.68891	0.919583	0.469661	1
NM_080442	chr4	129489008	129490770	-	1030	1	Tssk3|1700014N07Rik|4930594I21Rik|Stk22c|Stk22d|Tsk-3|Tssk-3|Tssk3b|-|4|4 D2.2|protein-coding	0.491541	0.488263	0.497134	0.489716	0.4895	1.36983	0.510111	1
NM_001102565	chr12	87428078	87443839	-	1940	1	Alkbh1|2700073G19Rik|Abh|Alkbh|alkB|hABH|-|12|12 D2|protein-coding	10.174	10.2144	10.1917	10.1912	10.1745	-0.0165896	0.806902	0.973682
NM_008416	chr8	84976909	84978748	-	1837	1	Junb|-|-|8 C3|8 41.41 cM|protein-coding	11.3733	11.4118	11.0247	10.9742	11.0273	-0.544623	8.89818e-25	5.92371e-23
NM_001077633	chr17	23917458	23919441	+	604	1	Dcpp3|Dcpp-3|EG620253|SPT-3|-|17|17 A3.3|protein-coding	0	0	0	0	0	NA	1	1
NM_028222	chr14	46760541	46771525	+	763	1	Cdkn3|2410006H10Rik|KAP|-|14|14 C1|protein-coding	9.74173	9.68589	9.69635	9.69524	9.70381	-0.0283221	0.720591	0.961907
NM_001167936	chr4	108181934	108217922	-	2280	1	Zyg11a|BC022150|-|4|4 C7|protein-coding	2.45206	2.44686	2.45272	2.4568	2.45867	0.977582	0.32219	0.796103
NM_001017427	chr4	73714579	73790602	-	5163	1	Rasef|BC030882|RAB45|-|4|4 C3|protein-coding	0	0	0	0	0	NA	1	1
NM_134041	chr12	113156421	113165458	+	3345	1	4930427A07Rik|AA536649|mFLJ00116|-|12|12 F1|protein-coding	10.4428	10.4323	10.5795	10.5306	10.5465	0.184788	0.00339932	0.0361206
NM_019573	chr8	114439652	115352712	+	2240	1	Wwox|5330426P09Rik|9030416C10Rik|WOX1|-|8|8 E1|protein-coding	8.5243	8.45444	8.468	8.45744	8.48955	-0.0521633	0.663999	0.948431
NM_001146350	chr2	32646595	32682669	+	3556	1	Eng|AI528660|AI662476|CD105|Endo|S-endoglin|-|2 B|2 22.09 cM|protein-coding	8.09652	8.07334	8.06812	8.10166	8.07361	-0.012086	0.927509	0.990382
NM_007498	chr1	191170297	191183333	-	1970	1	Atf3|LRG-21|-|1 H6|1 96.28 cM|protein-coding	0	0	0	0	0	NA	1	1
NM_007860	chr4	107291465	107307168	-	1683	1	Dio1|5DI|D1|ITDI1|TXDI1|-|4 C7|4 50.18 cM|protein-coding	-1.86719	-1.86617	-1.86745	-1.86762	-1.86768	-2.07879	0.647706	1
NM_031251	chr11	73183133	73199019	-	2997	1	Ctns|AI195360|AW049661|-|11|11 B4|protein-coding	8.95354	8.9489	8.99298	9.00777	8.97307	0.100896	0.308249	0.784099
NM_019439	chr17	37045966	37074305	+	4461	1	Gabbr1|GABAB1|GABAbR1|bM573K1.1|-|17 B1|17 19.16 cM|protein-coding	9.10472	9.04733	9.01124	9.09079	9.03394	-0.0710771	0.489359	0.892122
NM_178381	chr7	141101219	141117806	-	2986	1	Ano9|5430425C04Rik|Tmem16j|Tp53i5|Trp53i5|-|7|7 F5|protein-coding	1.31767	1.31364	1.31776	1.31606	1.31723	0.406976	0.765879	1
NM_016687	chr13	19623175	19632823	+	1750	1	Sfrp4|-|-|13 A2|13 6.99 cM|protein-coding	-1.30846	-1.30698	-1.30883	-1.30905	-1.3075	-1.12278	0.747659	1
NM_026195	chr1	71557156	71579403	+	2593	1	Atic|2610509C24Rik|AA536954|AW212393|-|1|1 C3|protein-coding	13.7727	13.7929	13.8284	13.8046	13.7896	0.0287768	0.378617	0.83287
NM_001160370	chr1	11414105	11601821	+	6806	1	A830018L16Rik|-|-|1|1 A2|protein-coding	0.40579	0.404941	0.404696	0.404031	0.407212	-0.0185004	0.991829	1
NM_001256033	chr8	79639676	79677755	+	7304	1	Otud4|4930431L18Rik|AI449692|D8Ertd69e|mKIAA1046|-|8 C1|8 37.74 cM|protein-coding	12.9896	13.0204	12.949	12.971	12.9376	-0.0643549	0.0757571	0.389966
NM_001282120	chr11	29526397	29545447	+	3070	1	Mtif2|2310038D14Rik|2410112O06Rik|IF-2(Mt)|IF-2mt|IF2(mt)|-|11|11 A3.3|protein-coding	10.5962	10.5298	10.5607	10.5071	10.5143	-0.0560655	0.387115	0.837297
NM_001290508	chr2	30392254	30400529	+	2447	1	Dolpp1|0610011H20Rik|AB030189|LSFR2|-|2|2 B|protein-coding	9.4887	9.52058	9.54681	9.5532	9.60441	0.131461	0.124241	0.529732
NM_146988	chr6	42911525	42912457	+	931	1	Olfr447|MOR261-1|-|6|6 B2.1|protein-coding	0	0	0	0	0	NA	1	1
NM_001035510	chrX	136993155	136996923	+	3323	1	Zcchc18|1500031H04Rik|Sizn2|-|X|X F1|protein-coding	2.72085	2.73175	2.72336	2.72868	2.71681	-0.345732	0.683131	0.951583
NM_177473	chr16	17276300	17278661	+	1396	1	Tmem191c|4933405M22Rik|D16Bwg1494e|MNCb-4137|-|16 A3|16 10.71 cM|protein-coding	4.77566	4.80062	4.78589	4.77549	4.7897	-0.11931	0.773985	0.971561
NM_026020	chr7	141447650	141451342	+	434	1	Rplp2|2700049I22Rik|-|7|7 F5|protein-coding	14.3773	14.3901	14.4149	14.4007	14.4645	0.0503797	0.139011	0.562998
NM_145565	chr5	120476547	120483905	+	1154	1	Sds|4432411H13Rik|SDH|-|5|5 F|protein-coding	4.127	4.10998	4.10888	4.10673	4.11169	-0.368505	0.467518	0.8801
NM_029599	chr2	153856188	153871084	-	1143	1	Sun5|1700021O15Rik|SPAG4L-2|SRG4|Spag4l|-|2|2 H1|protein-coding	-1.86719	-1.86734	-1.86738	-1.86663	-1.86755	0.260813	0.95441	1
NM_024217	chr8	104340594	104347672	+	1609	1	Cmtm3|9430096L06Rik|AI413895|BNAS2|Cklfsf3|-|8|8 D3|protein-coding	9.05706	8.99693	9.0256	8.9322	8.98097	-0.115693	0.27665	0.757681
NR_073369	chr2	181520485	181552880	+	4394	1	Dnajc5|2610314I24Rik|AU018536|Csp|-|2 H4|2 103.63 cM|protein-coding	12.6805	12.6639	12.679	12.6892	12.6698	0.00911772	0.80385	0.973682
NM_019819	chr11	84048045	84068357	-	1438	1	Dusp14|1110014C10Rik|2310042C07Rik|D11Ertd395e|MKP-L|Mkp6|-|11 C|11 51.29 cM|protein-coding	9.88104	9.89266	9.67289	9.69541	9.66482	-0.396672	1.49579e-07	3.68545e-06
NM_027689	chr10	84838148	84906538	+	3258	1	Rfx4|4933412G19Rik|NYD-sp10|-|10|10 C1|protein-coding	-1.32544	-1.32568	-1.32576	-1.3245	-1.32462	1.03725	0.781125	1
NM_133214	chr9	15505495	15545259	+	940	1	Smco4|Fn5|-|9|9 A2|protein-coding	8.33176	8.35497	8.33292	8.34277	8.34811	-0.00767033	0.949276	0.991224
NM_010026	chr15	64086840	64382919	-	6248	1	Asap1|AV239055|DEF-1|Ddef1|PAP|mKIAA1249|s19|-|15|15 D1|protein-coding	11.785	11.6906	11.7447	11.8361	11.767	0.0612172	0.268497	0.749849
NM_007391	chr9	36693220	36698837	+	1089	1	Acrv1|Msa63|SP-10|-|9 A4|9 20.67 cM|protein-coding	0.565801	0.564919	0.564665	0.563975	0.568797	0.227713	0.897199	1
NM_001167148	chr7	20121656	20122579	-	922	2	Gm16442|EG667071|Vmn1r92|-|7|7 A3|protein-coding	0	0	0	0	0	NA	1	1
NM_013846	chr13	53109317	53286109	-	3959	1	Ror2|Ntrkr2|mRor2|-|13 B1|13 27.68 cM|protein-coding	-1.86719	-1.86737	-1.86631	-1.86759	-1.86764	0.260813	0.95441	1
NM_028808	chr3	59207894	59210882	-	2522	1	P2ry13|2010001L06Rik|GPCR1|GPR94|Gpr86|P2Y13|P2yr13|SP174|-|3|3 D|protein-coding	0	0	0	0	0	NA	1	1
NM_198000	chr2	30795563	30801737	-	1431	1	1700001O22Rik|1700113K14Rik|4930549G18Rik|-|2|2 B|protein-coding	5.75862	5.76045	5.75436	5.74947	5.77605	0.00753856	0.979539	0.995338
NM_001291890	chr11	46054502	46147347	+	6185	1	Adam19|AL024287|MADDAM|MTLNB|Mltnb|-|11 B1.1|11 27.54 cM|protein-coding	2.38427	2.38091	2.38215	2.38093	2.38324	-0.0602865	0.947522	0.991224
NM_001081178	chr17	43389466	43459557	+	8512	1	Adgrf5|8430401C09Rik|9330185D23|AI528491|Gpr116|mKIAA0758|-|17|17 B3|protein-coding	2.74621	2.75001	2.74866	2.75212	2.75214	0.306022	0.7129	0.960944
NM_001166000	chr4	35706648	36718963	-	4089	1	Lingo2|B230217C06Rik|Lern3|Lrrn6c|-|4|4 A5|protein-coding	0.699364	0.710848	0.701064	0.702167	0.698385	-1.81888	0.324977	1
NM_001289740	chr6	54681624	54703855	+	5302	1	Mturn|2410066E13Rik|AI448550|B230212L03Rik|-|6|6 B3|protein-coding	6.98146	6.97806	6.96934	6.97912	6.94725	-0.0952748	0.619878	0.941609
NM_175681	chr11	67706430	67771153	-	4858	1	Glp2r|9530092J08Rik|GLP-2|-|11|11 B3|protein-coding	0	0	0	0	0	NA	1	1
NM_001033492	chrX	86250256	86256219	-	2396	1	Mageb4|CN716893|Mage-b4|mMage-b4|-|X|X C1|protein-coding	-1.30824	-1.30852	-1.30692	-1.30881	-1.30733	1.20694	0.733148	1
NM_001291002	chr2	125866223	125984298	+	2511	1	Galk2|2810017M24Rik|AI327030|Gk2|-|2|2 F1|protein-coding	11.2554	11.3043	11.3321	11.3288	11.3334	0.0707025	0.161248	0.606582
NM_007848	chr8	21055040	21056017	+	415	2	Defa31|CRS4C-2|CRS4C2|CRS4C2b|CRS4C2c|CRS4C2d|CRS4C3a|CRS4C3a2|CRS4C3b|CRS4C3c|CRS4C3d|CRS4C3e|Defa-rs7|Defcr-rs7|-|8|8 A2|protein-coding	0	0	0	0	0	NA	1	1
NR_073374	chr17	8293366	8311118	-	970	1	4930506C21Rik|-|-|17|17 A1|ncRNA	8.18039	8.22703	8.23852	8.18056	8.20568	0.0125358	0.924292	0.990382
NM_008942	chr11	97205856	97280576	-	4116	1	Npepps|AAP-S|MP100|Psa|R74825|goku|-|11 D|11 60.95 cM|protein-coding	12.034	12.0761	11.9998	12.0878	11.9568	-0.0513798	0.346475	0.810742
NM_001101463	chr5	145029600	145032764	-	1122	1	Gm4871|EG231885|-|5|5 G2|protein-coding	0.251947	0.248725	0.255374	0.248391	0.251755	1.0546	0.638667	1
NM_001100466	chr4	111919555	111950356	+	1269	1	Skint8|OTTMUSG00000009475|-|4|4 D1|protein-coding	0	0	0	0	0	NA	1	1
NM_001081956	chrX	36608183	36645414	-	6144	1	Akap17b|AA407619|AKAP-17B|B230333C21Rik|C230056F04Rik|PRKA17B|Sfrs17b|Srsf17b|Talia|-|X|X A3.3|protein-coding	9.00456	9.05574	8.99934	9.03036	8.99188	-0.0587024	0.553911	0.925634
NM_001277861	chr19	10550461	10555763	-	1035	1	Tmem216|1110017C22Rik|2810441K11Rik|4921533J23Rik|A930021F15Rik|AI482550|-|19|19 A|protein-coding	7.96685	7.98114	7.96459	7.942	7.96583	-0.0648808	0.63495	0.943384
NR_033138	chr4	152697540	152700922	+	1288	1	Gm833|-|-|4|4 E2|ncRNA	0	0	0	0	0	NA	1	1
NR_110336	chr11	89060751	89067884	+	766	1	Dgkeos|A930013B10Rik|-|11|11 C|ncRNA	-0.0742459	-0.0721396	-0.0701619	-0.0729381	-0.0731196	0.818816	0.718017	1
NM_181406	chr4	34614958	34660167	+	1845	1	Rars2|1500002I10Rik|PRO1992|Rarsl|-|4|4 A5|protein-coding	10.5415	10.5321	10.6046	10.5816	10.5552	0.0690519	0.263658	0.744673
NM_009520	chr3	104944805	104961709	-	3566	1	Wnt2b|Wnt13|-|3 F2.2|3 45.88 cM|protein-coding	4.88142	4.88001	4.88755	4.90053	4.89671	0.364082	0.362988	0.823442
NM_010353	chr11	73135484	73138294	-	2808	1	Gsg2|Haspin|-|11 B4|11 45.25 cM|protein-coding	10.3824	10.412	10.5502	10.5583	10.5886	0.272614	1.70217e-05	0.000305707
NM_173761	chr2	180904377	180920936	-	3164	1	Ythdf1|2210410K23Rik|8030473O16|-|2|2 H4|protein-coding	11.727	11.7595	11.793	11.8218	11.7894	0.076469	0.0923184	0.443395
NM_029232	chr2	113285732	113297190	+	1223	1	Tmco5b|4930563P21Rik|-|2|2 E4|protein-coding	-1.86719	-1.86617	-1.86745	-1.86762	-1.86768	-2.07879	0.647706	1
NM_001101484	chrX	12651883	12652820	+	935	1	Gm4984|AI428901|EG245347|-|X|X A1.1|protein-coding	0.953318	0.952854	0.961285	0.957617	0.958767	3.63305	0.0612484	1
NM_020618	chr11	99209048	99231017	-	2905	1	Smarce1|2810417B20Rik|5830412H02Rik|9030408N19Rik|Baf27|-|11|11 D|protein-coding	12.3827	12.3737	12.4015	12.3716	12.4135	0.022249	0.577687	0.933233
NR_040370	chr2	80391364	80398216	+	2612	1	Gm13752|OTTMUSG00000013925|-|2 C3|2 48.12 cM|ncRNA	6.1182	6.131	6.10754	6.13624	6.10011	-0.108784	0.677947	0.951155
NM_134040	chr12	13219307	13249174	-	2441	1	Ddx1|AA409185|DBP-RB|-|12|12 A1.1|protein-coding	13.8327	13.8508	13.8996	13.8578	13.868	0.03894	0.235234	0.711492
NM_028189	chr8	71691720	71701800	-	2097	1	B3gnt3|2210008L19Rik|-|8|8 B3.3|protein-coding	1.80582	1.81424	1.81558	1.81294	1.81212	0.745841	0.5496	1
NM_178618	chr11	61684410	61709950	+	4779	1	Fam83g|2310040C09Rik|AI506990|wly|-|11|11 B2|protein-coding	-0.268596	-0.271769	-0.267266	-0.27201	-0.270313	0.319763	0.897305	1
NM_001310674	chr16	32914100	33016029	+	6142	1	Lrch3|2210409B11Rik|AW215594|Gm1742|-|16|16 B3|protein-coding	11.9205	11.8807	11.8618	11.9073	11.8631	-0.0292051	0.522834	0.910634
NM_175275	chr4	84884309	85131921	+	5497	1	Cntln|AI448092|B430108F07Rik|D530005L17Rik|-|4|4 C4|protein-coding	11.7508	11.7496	11.7098	11.6918	11.6904	-0.0708495	0.110916	0.494503
NM_001081222	chr18	10566512	10610352	-	4527	1	Esco1|A930014I12Rik|-|18|18 A1|protein-coding	10.4012	10.4441	10.4446	10.4176	10.4227	0.00688634	0.914117	0.988977
NR_132309	chr19	4214238	4233634	+	882	1	Clcf1-pold4|-|-|19 A|ncRNA	8.32328	8.34161	8.19948	8.26714	8.2225	-0.33639	0.00816266	0.0743608
NM_146338	chr8	72107040	72110509	+	1077	1	Olfr374|MOR130-1|-|8|8 B3.3|protein-coding	0	0	0	0	0	NA	1	1
NM_022994	chr3	88920803	88950282	-	4613	1	Dap3|4921514D13Rik|DAP-3|MRP-S29|S29mt|-|3 F1|3 39.01 cM|protein-coding	11.5051	11.5378	11.5726	11.5049	11.4951	0.00232806	0.964319	0.992755
NM_181394	chr9	102626296	102634244	+	403	1	Anapc13|1810004D07Rik|APC13|SWM1|-|9|9 F1|protein-coding	9.19407	9.16326	9.16412	9.1562	9.17846	-0.0273813	0.767078	0.969756
NM_010894	chr2	79452641	79456636	-	2490	1	Neurod1|BETA2|BHF-1|Nd1|Neurod|bHLHa3|-|2 C3|2 47.58 cM|protein-coding	0	0	0	0	0	NA	1	1
NM_175191	chr12	31706867	31713926	-	4582	1	Gpr22|2900068K05Rik|AW061316|-|12|12 A3|protein-coding	5.36783	5.403	5.40138	5.43073	5.42657	0.636586	0.0864119	0.425514
NR_106081	chr2	92594602	92594676	+	74	1	Mir7222|Gm27413|mmu-mir-7222|-|2|2 E1|ncRNA	0	0	0	0	0	NA	1	1
NM_013903	chr9	7628231	7674968	+	3264	1	Mmp20|-|-|9|9 A1|protein-coding	0	0	0	0	0	NA	1	1
NM_001081120	chr8	124740257	124751809	-	1312	1	Fam89a|2310031A18Rik|-|8|8 E2|protein-coding	3.27179	3.26918	3.28286	3.27943	3.27203	0.595136	0.405677	0.849994
NM_172850	chr1	92870129	92902906	-	3223	1	Ankmy1|4930483I10Rik|ZMYND13|-|1|1 D|protein-coding	1.67754	1.67757	1.67223	1.67077	1.67548	-0.94886	0.407464	1
NM_009435	chr16	17894203	17895653	+	1448	1	Tssk1|Stk22a|TSK-1|Tsk1|Tssk|Tssk1b|-|16 A3|16 11.09 cM|protein-coding	2.7146	2.72449	2.72972	2.7358	2.72727	1.47654	0.139103	0.563204
NM_053217	chr19	34617051	34640743	-	3360	1	Ifit1bl2|2010002M12Rik|AW412491|Ifit1b|-|19|19 C1|protein-coding	-0.0557188	-0.0588638	-0.0566981	-0.055463	-0.0574811	0.641102	0.774554	1
NM_177353	chrX	20105755	20291764	-	2450	1	Slc9a7|A530087D17Rik|NHE7|-|X|X A1.3|protein-coding	-1.35819	-1.35843	-1.3585	-1.3587	-1.35608	0.983711	0.818998	1
NM_001003912	chr3	87618751	87738033	+	5558	1	Arhgef11|B930073M02|E130307F09|PDZ-RhoGEF|Prg|RhoGEF|mKIAA0380|-|3|3 F1|protein-coding	11.2512	11.2786	11.2359	11.2675	11.214	-0.0371085	0.477024	0.885555
NM_001099305	chrX	74480287	74481399	-	623	1	Gm6880|EG628456|-|X|X A7.3|protein-coding	0	0	0	0	0	NA	1	1
NM_009414	chr7	46644641	46672537	-	4549	1	Tph1|Tph|-|7 B3|7 30.43 cM|protein-coding	2.105	2.10761	2.11334	2.10788	2.10178	0.218296	0.837306	0.976797
NM_001270793	chr12	87602665	87608850	+	1406.5	2	Gm2042|-|-|12|12 D2|protein-coding	0	0	0	0	0	NA	1	1
NM_001163447	chr17	24897506	24936977	-	5542	1	Mapk8ip3|BB120594|D17Wsu15e|JIP-3|JSAP1|JSAP1a|JSAP1b|JSAP1c|JSAP1d|Jip3|Syd2|mKIAA1066|-|17 A3.3|17 12.53 cM|protein-coding	11.4787	11.4809	11.3226	11.3303	11.3567	-0.197465	4.7685e-05	0.000798422
NR_038019	chr10	99609171	99658134	+	2092	1	Gm20110|-|-|10 D1|10 51.2 cM|ncRNA	-1.86719	-1.86617	-1.86745	-1.86762	-1.86768	-2.07879	0.647706	1
NM_013911	chr9	20637749	20642806	-	2121	1	Fbxl12|3110048D16Rik|Fbl12|-|9|9 A3|protein-coding	7.78708	7.75675	7.80238	7.77256	7.8079	0.0975181	0.511368	0.903451
NM_013545	chr6	124720707	124733154	-	2201	1	Ptpn6|70Z-SHP|Hcph|PTPTY-42|Ptp1C|SH-PTP1|SHP-1|hcp|me|-|6 F2|6 59.17 cM|protein-coding	5.19122	5.20635	5.20521	5.2079	5.19173	0.053215	0.881381	0.984584
NM_001254953	chr17	43534174	43543639	-	1317	1	Ankrd66|AU041848|D730048J04Rik|Gm4368|-|17 B3|17|protein-coding	4.22165	4.24932	4.24109	4.25003	4.25836	0.571964	0.303545	0.779029
NR_029575	chr13	63301208	63301275	+	67	1	Mir24-1|Mirn189|Mirn24|Mirn24-1|miR-189|miR-24|miR-24-1|-|13|13 B3|ncRNA	0.319253	0.323556	0.318864	0.323917	0.321841	0.0731149	0.971635	1
NM_011607	chr4	63959785	64047015	-	7072	1	Tnc|AI528729|C130033P17Rik|Hxb|TN|TN-C|Ten|cytotactin|tenascin-C|-|4 C1|4 34.06 cM|protein-coding	0.349375	0.3537	0.351147	0.350508	0.353615	0.10857	0.955174	1
NM_001037722	chr3	89339640	89350028	-	2982	1	Adam15|AD56|MDC15|-|3 F1|3 39.07 cM|protein-coding	11.1234	11.0843	11.0885	11.1037	11.1001	-0.00791589	0.880551	0.984584
NM_001077424	chr9	99612502	99622367	+	2752	1	A4gnt|AV080780|Alpha4gnt|Gm798|-|9|9 E3.3|protein-coding	0	0	0	0	0	NA	1	1
NM_030707	chr3	87250965	87263524	-	1981	1	Fcrls|2810439C17Rik|9330158F12|FcRH2sc|Fcrh2|IFGP2|IgSR|MMAN-g|Msr2|moFcRH2sc|-|3|3 F1|protein-coding	0	0	0	0	0	NA	1	1
NM_001113180	chr9	4417893	4796234	-	5428	1	Gria4|GluA4|GluR-D|Glur-4|Glur4|Gluralpha4|spkw1|-|9 A1|9 2.46 cM|protein-coding	0	0	0	0	0	NA	1	1
NM_146998	chr16	59148852	59149778	+	925	1	Olfr195|MOR184-5|-|16|16 C1.3|protein-coding	0	0	0	0	0	NA	1	1
NM_001159743	chr12	30884324	30893854	+	1501	1	Fam150b|6230419C23Rik|-|12 A2|12|protein-coding	4.6899	4.68888	4.68379	4.69963	4.67872	-0.0543968	0.898032	0.986972
NR_106134	chr7	30589380	30589437	+	57	1	Mir3569|Gm27279|mmu-mir-3569|-|7|7 B1|ncRNA	-0.416134	-0.41403	-0.414229	-0.41477	-0.414938	0.350508	0.885158	1
NM_177667	chr4	106622449	106640187	+	2526	1	Ttc22|4732467L16Rik|-|4|4 C7|protein-coding	-1.30846	-1.30698	-1.30883	-1.30905	-1.3075	-1.12278	0.747659	1
NM_011631	chr10	86690841	86705444	-	2739	1	Hsp90b1|ERp99|GRP94|TA-3|Targ2|Tra-1|Tra1|endoplasmin|gp96|-|10 C1|10 43.05 cM|protein-coding	15.4817	15.4479	15.4164	15.4311	15.4469	-0.0379961	0.196393	0.662924
NM_001272024	chr3	95160420	95174050	+	4117	1	Sema6c|Semay|mKIAA1869|-|3|3 F2.1|protein-coding	4.84077	4.87036	4.85336	4.84796	4.86638	0.00395207	0.992421	0.998169
NR_029849	chrX	113074824	113074893	-	69	1	Mir361|Mirn361|mir-361|mmu-mir-361|-|X|X E1|ncRNA	-1.32544	-1.32568	-1.32576	-1.3245	-1.32462	1.03725	0.781125	1
NM_172566	chr11	101425085	101435665	+	3208	1	Rundc1|AW125546|D930024B17|-|11|11 D|protein-coding	9.19299	9.27416	9.2349	9.21368	9.19507	-0.0484474	0.611862	0.9402
NM_133720	chr14	73029128	73049114	-	1794	1	Cysltr2|2300001H05Rik|CYSLT2R|Cltr2|Cyslt2|-|14|14 D3|protein-coding	0	0	0	0	0	NA	1	1
NM_008030	chr1	162953799	162984528	-	2037	1	Fmo3|AW111792|-|1 H2.1|1 70.34 cM|protein-coding	0	0	0	0	0	NA	1	1
NM_178723	chr2	77410627	77816816	-	3195	1	Zfp385b|B830010L13Rik|C130013B13Rik|Zfp533|Znf385b|-|2|2 C3|protein-coding	-1.30824	-1.30852	-1.30692	-1.30881	-1.30733	1.20694	0.733148	1
NM_001005868	chr13	103818786	103920586	-	6635	1	Erbin|1700028E05Rik|Erbb2ip|mKIAA1225|-|13|13 D1|protein-coding	13.0462	13.0927	13.0289	13.0522	13.0036	-0.0508203	0.181662	0.643407
NM_027421	chr11	86210683	86257568	-	5895	1	Ints2|2810417D08Rik|AA408260|AI987735|mKIAA1287|-|11|11 C|protein-coding	11.4989	11.4829	11.4697	11.4798	11.4115	-0.0509756	0.318667	0.792612
NM_027732	chr7	24870057	24877651	+	1608	1	Dmrtc2|4933432E21Rik|Dmrt7|-|7|7 A3|protein-coding	0	0	0	0	0	NA	1	1
NM_030889	chr5	36017181	36398139	-	5692	1	Sorcs2|N28137|mKIAA1329|-|5|5 B3|protein-coding	6.83	6.82993	6.864	6.87024	6.87412	0.288733	0.152032	0.587385
NM_183000	chr5	24413451	24417834	+	1929	1	Asic3|AW742291|Accn3|DRASIC|SLNAC1|TNAC1|-|5|5 A3|protein-coding	4.47799	4.47753	4.49476	4.48145	4.47498	0.193619	0.67465	0.950895
NR_045933	chr13	26283159	26312406	-	1638	1	1700092E19Rik|-|-|13|13 A3.1|ncRNA	0	0	0	0	0	NA	1	1
NM_029401	chr4	138568969	138623992	-	3833	1	Vwa5b1|4931403E03Rik|-|4|4 D3|protein-coding	0	0	0	0	0	NA	1	1
NM_011652	chr2	76703984	76982547	-	101359	1	Ttn|1100001C23Rik|2310036G12Rik|2310057K23Rik|2310074I15Rik|AF006999|AV006427|D330041I19Rik|D830007G01Rik|L56|mdm|shru|-|2 C3|2 45.13 cM|protein-coding	7.37018	7.33701	7.36827	7.42357	7.42435	0.283653	0.109808	0.492663
NM_011947	chr11	106084902	106155434	+	3131	1	Map3k3|AW548911|MAPKKK3|Mekk3|mKIAA4031|-|11|11 E1|protein-coding	11.5055	11.542	11.511	11.5633	11.55	0.0239713	0.626107	0.943138
NM_007502	chr9	96332675	96364299	-	1822	1	Atp1b3|AA409958|AI664000|AW212096|-|9 E3.3|9 50.31 cM|protein-coding	12.3747	12.3512	12.4095	12.3734	12.3804	0.031502	0.430643	0.863761
NM_008920	chr2	84980461	84983632	+	830	1	Prg2|EMBP|MBP|mMBP|mMBP-1|-|2 D|2 49.45 cM|protein-coding	0	0	0	0	0	NA	1	1
NM_029250	chr6	143167230	143208547	+	6424	1	Etnk1|1110061E11Rik|4930555L11Rik|AI195356|AI841245|C80956|D6Ertd3e|EKI1|-|6 G3|6 75.41 cM|protein-coding	13.0921	13.0887	12.966	12.962	12.9438	-0.161672	2.81882e-06	5.70646e-05
NM_001290821	chr11	55514239	55608198	-	2402	1	Glra1|nmf11|oscillator|ot|spasmodic|spd|-|11 B1.3|11 33.12 cM|protein-coding	-0.416134	-0.41403	-0.414229	-0.41477	-0.414938	0.350508	0.885158	1
NM_152818	chr11	3703731	3863903	-	4081	1	Osbp2|1700095P05Rik|C630001G20Rik|Gm244|ORP-4|OSBPL1|-|11|11 A1|protein-coding	2.11776	2.1134	2.11511	2.12228	2.1309	1.46501	0.234401	1
NM_001204913	chr1	25276404	25277954	-	1548	1	Gm20172|-|-|1 A5|1 10.48 cM|protein-coding	1.43744	1.43809	1.433	1.44117	1.43346	-0.459139	0.723643	1
NM_019430	chr7	122671744	122769394	+	1520	1	Cacng3|-|-|7|7 F2|protein-coding	0	0	0	0	0	NA	1	1
NR_027969	chr13	67729262	67756838	+	2905	1	Zfp85os|4930441O14Rik|-|13|13 B3|ncRNA	2.99214	2.99984	3.00014	2.99099	2.99287	-0.121099	0.872687	0.984448
NM_206534	chr12	76765573	76783178	+	633	1	Churc1|1700030P15Rik|My015|chch|-|12|12 C3|protein-coding	8.00051	8.06308	8.04115	8.00226	8.04603	-0.0112867	0.936106	0.990382
NM_011579	chr11	48985329	48992246	-	2805	1	Tgtp1|Gtp2|Irgb6|Mg21|Tgtp|-|11|11 B1.2|protein-coding	-0.37767	-0.377881	-0.371345	-0.378088	-0.376455	2.31606	0.40002	1
NM_009204	chr11	69942286	69948190	-	2809	1	Slc2a4|Glut-4|Glut4|-|11 B3|11 42.93 cM|protein-coding	0.286373	0.286083	0.290271	0.291005	0.288952	2.96319	0.173911	1
NM_001286972	chr3	34077351	34081354	-	1863	1	Dnajc19|1810055D05Rik|AA959924|Tim14|-|3 A3|3|protein-coding	10.7697	10.7825	10.7906	10.7851	10.7716	0.00886765	0.87572	0.984584
NM_026251	chr2	122120108	122186189	-	2414	1	Patl2|4930424G05Rik|Pat1a|-|2 E5|2|protein-coding	-1.86719	-1.86737	-1.86631	-1.86759	-1.86764	0.260813	0.95441	1
NM_172393	chr10	43950307	44004846	-	7394	1	Aim1|AI462491|AI463325|-|10 B2|10 23.14 cM|protein-coding	11.4413	11.4924	11.3328	11.3418	11.3477	-0.175934	0.000357097	0.00500986
NM_008518	chr17	35194507	35196305	+	1090	1	Ltb|AI662801|LTbeta|Tnfc|Tnfsf3|Tnlg1c|p33|-|17 B1|17 18.59 cM|protein-coding	0	0	0	0	0	NA	1	1
NM_175028	chr18	80127135	80151482	-	4182	1	Adnp2|8430420L05Rik|BC024969|Kiaa0863|Zfp508|mKIAA0863|-|18|18 E3|protein-coding	11.2198	11.155	11.1166	11.1645	11.1462	-0.0623649	0.255503	0.734419
NM_146811	chr9	38537882	38539829	+	969	1	Olfr910|MOR165-3|-|9|9 A5.1|protein-coding	0	0	0	0	0	NA	1	1
NM_025825	chr11	85191310	85235120	-	2390	1	Appbp2|1300003O07Rik|AI465480|PAT1|-|11|11 C|protein-coding	10.8239	10.7584	10.83	10.9012	10.8618	0.113182	0.0650372	0.353998
NM_001166840	chr7	20441670	20442593	-	922	2	Vmn1r149|Gm4194|-|7 A3|7|protein-coding	0	0	0	0	0	NA	1	1
NM_001013412	chr5	135560448	135563569	-	278	1	Ccl26|Ccl26l|-|5|5 G2|protein-coding	0	0	0	0	0	NA	1	1
NM_199196	chr11	79993106	80034123	+	4355	1	Suz12|2610028O16Rik|AI195385|AU016842|AW536442|D11Ertd530e|mKIAA0160|-|11 B5|11 47.36 cM|protein-coding	13.0672	13.0853	13.026	13.0163	13.0074	-0.0729066	0.0344176	0.228605
NM_009428	chrX	144377327	144688180	-	8489	1	Trpc5|CCE2|TRP-5|TRP5|Trrp5|-|X F2|X 65.49 cM|protein-coding	4.21439	4.21304	4.20509	4.21374	4.22279	0.0097964	0.9844	0.996922
NR_040321	chr2	173124749	173133204	+	3473	1	Ctcflos|1300015D01Rik|A530094K13|-|2|2 H3|ncRNA	0	0	0	0	0	NA	1	1
NM_178387	chr5	73651380	73679484	+	1934	1	Spata18|1700067I02Rik|-|5|5 C3.3|protein-coding	-1.86719	-1.86733	-1.86737	-1.86748	-1.86672	0.260813	0.95441	1
NM_001136085	chrX	20662896	20683179	+	4045	1	Uba1|A1S9|Sbx|Ube-1|Ube1x|-|X A1.3|X 16.15 cM|protein-coding	14.0263	14.0473	14.0074	14.0435	13.9689	-0.0352691	0.329336	0.802098
NM_001166723	chr7	20167460	20168377	-	916	2	Vmn1r94|EG620537|Gm6160|-|7|7 A3|protein-coding	0	0	0	0	0	NA	1	1
NR_045964	chr17	94759942	94834799	-	1851	1	Gm1976|100038868|-|17|17 E5|ncRNA	8.47419	8.43964	8.39673	8.4258	8.38012	-0.17251	0.148559	0.5808
NM_016690	chr5	100033579	100039222	-	2740	1	Hnrnpdl|AA407431|AA959857|D5Ertd650e|D5Wsu145e|Hnrnpdl1|Hnrpdl|JKTBP|hnRNP DL|hnRNP-DL|-|5 E4|5 48.46 cM|protein-coding	12.4634	12.4388	12.4073	12.4023	12.4442	-0.0407292	0.311291	0.785534
NM_010023	chr17	24426683	24439316	+	1082	1	Eci1|Dci|eci|-|17|17 A3.3|protein-coding	10.212	10.2435	10.282	10.2745	10.2651	0.0766785	0.248719	0.727182
NM_001126321	chrX	78240462	78245921	-	750	1	Gm14743|OTTMUSG00000017864|-|X|X B|protein-coding	0	0	0	0	0	NA	1	1
NM_030106	chrX	135718667	135720673	-	294	1	Tmsb15a|1700129I15Rik|Tb15a|Tmsbl1|Tmsl8|-|X|X F1|protein-coding	-1.86561	-1.86744	-1.86751	-1.86774	-1.86781	-2.30448	0.573731	1
NR_033482	chrX	21312210	21334727	-	768	1	Gm6938|EG629024|-|X|X A2|ncRNA	0	0	0	0	0	NA	1	1
NM_026165	chr18	31580168	31609902	-	4361	1	Slc25a46|1200007B05Rik|AI325987|-|18|18 B1|protein-coding	11.5366	11.5517	11.55	11.5198	11.5439	-0.00909474	0.846695	0.977994
NR_046306	chr12	109656345	109656415	+	70	1	DQ267102|-|-|12 F1|12|snoRNA	0	0	0	0	0	NA	1	1
NM_001011757	chr7	104703569	104704603	+	1033	1	Olfr663|MOR40-12|-|7|7 E3|protein-coding	0	0	0	0	0	NA	1	1
NR_028446	chrX	146994390	146994508	+	118	1	Snora35|MBI-36|-|X|X F2|snoRNA	0	0	0	0	0	NA	1	1
NM_001033632	chr7	141015812	141016892	-	537	1	Ifitm6|A330075D07|Dspa2f|Fgls5|fragilis5|-|7|7 F5|protein-coding	-0.0923089	-0.0902037	-0.0882296	-0.0927923	-0.0895089	0.803843	0.737905	1
NM_025638	chr11	87033794	87074137	-	2472	1	Gdpd1|2610020H15Rik|-|11|11 C|protein-coding	8.77969	8.79329	8.92737	8.859	8.91549	0.304483	0.00486287	0.0485131
NR_105987	chr4	139644042	139644111	+	69	1	Mir7020|Gm27759|mmu-mir-7020|-|4|4 D3|ncRNA	-1.86719	-1.86734	-1.86738	-1.86663	-1.86755	0.260813	0.95441	1
NM_001011875	chr14	51056698	51057242	-	542	1	Rnase12|Rai1|-|14|14 C1|protein-coding	0	0	0	0	0	NA	1	1
NM_001177374	chr17	46928291	47010532	-	7600	1	Ubr2|9930021A08Rik|AI462103|AW540746|E130209G04Rik|ENSMUSG00000043296|mKIAA0349|-|17|17 C|protein-coding	12.2686	12.1972	12.1944	12.2382	12.1546	-0.0464909	0.337182	0.806746
NR_035480	chr2	92191977	92192074	+	97	1	Mir1955|mir-1955|mmu-mir-1955|-|2 E1|2 50.81 cM|ncRNA	0.774113	0.77553	0.772895	0.773971	0.775306	-0.298184	0.849234	1
NM_027797	chr7	141328130	141337155	+	1860	1	Tmem80|5530601I19Rik|-|7|7 F5|protein-coding	7.70476	7.67181	7.71615	7.72241	7.7588	0.201452	0.191132	0.657051
NM_133946	chr7	140920902	140929192	+	4426	1	Nlrp6|AI504961|Avr|Nalp6|Navr|Navr/Avr|Non-AVR|Pypaf5|-|7|7 F5|protein-coding	0.0358374	0.0374721	0.0325436	0.0342	0.0340056	-1.90218	0.351458	1
NR_033603	chr10	111500788	111501345	+	557	1	Gm5176|EG382421|-|10|10 D1|pseudo	4.91345	4.88996	4.90693	4.93416	4.92493	0.525724	0.211795	0.678383
NR_028056	chr3	88716854	88731048	+	2532	1	Rit1|RIBB|ROC1|Rit|-|3|3 F1|protein-coding	9.92144	9.89932	9.96619	9.98702	9.97495	0.121843	0.09344	0.445937
NR_033213	chrX	69929260	70143588	-	1123	1	1700111N16Rik|-|-|X|X A7.2|ncRNA	0	0	0	0	0	NA	1	1
NM_025773	chr1	16568674	16619338	-	3131	1	Ube2w|6130401J04Rik|-|1|1 A3|protein-coding	11.4927	11.5511	11.4462	11.4383	11.4611	-0.102384	0.0373012	0.240797
NR_049202	chr7	61739350	61739409	-	59	2	Mir344h-2|Gm23309|mmu-mir-344h-2|-|7|7 C|ncRNA	0	0	0	0	0	NA	1	1
NM_178183	chr13	21753377	21753912	-	533	1	Hist1h2ak|-|-|13|13 A3.1|protein-coding	12.1732	12.1668	12.1945	12.2046	12.1371	0.0112604	0.799777	0.973682
NR_024324	chr7	120597625	120598475	+	850	1	E130201H02Rik|-|-|7|7 F2|pseudo	-1.26839	-1.27082	-1.27092	-1.26919	-1.2712	-1.30551	0.685916	1
NM_001146022	chr14	32959547	33185066	-	9620	1	Wdfy4|Gm18810|-|14|14 B|protein-coding	-0.606896	-0.607182	-0.607225	-0.603964	-0.604236	2.02902	0.483696	1
NM_029942	chr18	41875696	41951194	-	715	1	Prelid2|1700003A01Rik|C330008K14Rik|-|18|18 B3|protein-coding	0	0	0	0	0	NA	1	1
NM_025421	chr12	85272398	85280435	-	643	1	Acyp1|1110039O14Rik|AI325944|-|12|12 D1|protein-coding	8.95129	8.9773	9.02055	8.9785	8.94438	0.0403472	0.695933	0.955553
NM_011318	chr1	172893961	172895054	-	980	1	Apcs|Sap|-|1 H3|1 80.33 cM|protein-coding	0	0	0	0	0	NA	1	1
NM_147011	chr2	86170871	86171815	-	943	1	Olfr1044|MOR185-4|-|2|2 D|protein-coding	0	0	0	0	0	NA	1	1
NM_018860	chr10	128548110	128549168	-	443	1	Rpl41|1810055P16Rik|2210411K19Rik|-|10|10 D3|protein-coding	14.8709	14.9162	14.9233	14.8931	14.9134	0.0183243	0.557154	0.926786
NM_172568	chr11	105360798	105456735	-	3060	1	March10|4933417C16Rik|AV039223|OTTMUSG00000002847|Rnf190|-|11|11 E1|protein-coding	-0.0189868	-0.02216	-0.017731	-0.0224377	-0.0190552	0.683655	0.77087	1
NM_001309528	chr5	113243220	113280601	-	4330	1	Sgsm1|2410098H20Rik|AA408781|D5Bwg1524e|E130107M15|NuIP|Rutbc2|-|5 F|5 55.45 cM|protein-coding	10.0996	10.0251	10.2931	10.348	10.3197	0.450824	3.53859e-10	1.08404e-08
NM_001166062	chr12	87644120	87648983	-	682.5	2	Gm16381|EG435336|-|12|12 D2|protein-coding	0	0	0	0	0	NA	1	1
NM_007837	chr10	127290793	127296288	+	865	1	Ddit3|CHOP-10|CHOP10|chop|gadd153|-|10|10 D3|protein-coding	8.77994	8.75669	8.6061	8.56472	8.51143	-0.57294	6.52976e-07	1.44437e-05
NM_001286785	chr6	93675453	94283917	-	7904	1	Magi1|AIP3|BAP1|Baiap1|Gukmi1|MAGI1c|Magi-1|TNRC19|WWP3|mKIAA4129|-|6|6 D1|protein-coding	10.1407	10.1648	10.1431	10.168	10.1537	0.00323218	0.962202	0.992707
NM_001310038	chr19	4214238	4223505	+	1954	1	Clcf1|BSF-3|Bsf3|CLC|NNT-1|-|19|19 A|protein-coding	7.91927	7.89066	7.70093	7.67416	7.66029	-0.915842	1.94006e-10	6.18987e-09
NM_001166670	chr11	58120001	58168539	-	6178	1	Gemin5|AA407055|AA407208|AI451603|BB194447|C330013N08|-|11|11 B1.3|protein-coding	12.1504	12.1828	12.1652	12.1878	12.1322	-0.00702109	0.871547	0.983884
NM_001284519	chr13	24327404	24477289	+	9889	1	Cmah|-|-|13|13 A3.1|protein-coding	9.68414	9.6692	9.5207	9.57498	9.51401	-0.279118	0.000752096	0.00973296
NM_146094	chr19	10182888	10196872	+	3444	1	Fads1|0710001O03Rik|A930006B21Rik|AI317215|DSD|-|19|19 A|protein-coding	12.669	12.6325	12.6098	12.6006	12.6066	-0.0553905	0.14061	0.565469
NR_027881	chr17	9147719	9168022	-	1216	1	6530411M01Rik|-|-|17|17 A1|ncRNA	0	0	0	0	0	NA	1	1
NM_001177978	chr7	119561708	119600694	+	6526	1	Acsm2|AI315615|BC031140|-|7|7 F2|protein-coding	2.26058	2.2602	2.26147	2.26033	2.26098	0.0786495	0.934688	0.990382
NM_001276355	chr4	49661611	49845769	-	7700	1	Grin3a|6430537F04|A830097C19Rik|NMDAR-L|NR3A|mKIAA1973|-|4|4 B1|protein-coding	6.39557	6.37853	6.37393	6.41417	6.38024	0.0255067	0.915875	0.988977
NM_028261	chr18	35733678	35740554	-	2293	1	Tmem173|2610307O08Rik|ERIS|MPYS|Mita|STING|-|18 B2|18|protein-coding	6.78109	6.78122	6.80522	6.77554	6.76092	-0.00521365	0.980099	0.995338
NM_009084	chr1	72711260	72713813	+	582	1	Rpl37a|-|-|1|1 C3|protein-coding	14.708	14.7704	14.7589	14.7514	14.7439	0.0132192	0.685046	0.951583
NM_018867	chr7	132042810	132154741	-	3490	1	Cpxm2|4632435C11Rik|CPX-2|Cpx2|-|7|7 F3|protein-coding	0	0	0	0	0	NA	1	1
NM_028595	chr19	11469368	11482196	+	1834	1	Ms4a6c|2200009H22Rik|2210417N07Rik|-|19|19 A|protein-coding	2.89268	2.88483	2.88786	2.88315	2.88167	-0.409877	0.592947	0.936684
NR_126492	chr15	96073338	96079553	-	2898	1	D030018L15Rik|-|-|15|15 F1|pseudo	-1.26944	-1.26793	-1.26983	-1.26832	-1.27006	-1.12315	0.744474	1
NR_045614	chr7	122969058	122970459	-	1401	1	4930413G21Rik|-|-|7|7 F2|ncRNA	6.99209	6.9518	7.02305	6.97562	7.01654	0.223371	0.269339	0.751013
NM_172839	chr19	40831279	40848570	+	3809	1	Ccnj|D430039C20Rik|-|19|19 C3|protein-coding	8.52787	8.52792	8.56367	8.58142	8.58363	0.145331	0.198109	0.665
NM_027490	chr18	44380500	44424969	+	8630	1	Dcp2|2410015D23Rik|5730537H01Rik|AL118268|-|18|18 B3|protein-coding	11.9486	11.9256	11.8813	11.9344	11.8726	-0.0526868	0.253937	0.733472
NM_178206	chr13	21717628	21718115	+	485	1	Hist1h3h|H3-291|-|13|13 A3.1|protein-coding	10.4086	10.5561	10.6114	10.6081	10.6089	0.196186	0.00725085	0.0679773
NM_011041	chr12	56695471	56712822	+	4328	1	Pax9|Pax-9|-|12 C1|12 24.53 cM|protein-coding	8.10373	8.14985	8.12443	8.09239	8.10133	-0.0783024	0.554026	0.925634
NM_001290730	chr2	74705489	74707932	+	2042	1	Hoxd8|4921540P06Rik|AI047735|Hox-4.3|Hox-5.4|-|2 C3|2 44.13 cM|protein-coding	0	0	0	0	0	NA	1	1
NM_018753	chr2	163995197	164018587	+	2767	1	Ywhab|1300003C17Rik|14-3-3b|-|2|2 H3|protein-coding	12.8734	12.8296	12.8659	13.007	12.9657	0.118094	0.019833	0.150157
NM_001324520	chr12	30174482	30373376	-	2371	1	Sntg2|2210008K22Rik|9530013L23|BB121248|G2syn|Syn5|-|12|12 A2|protein-coding	0	0	0	0	0	NA	1	1
NM_145979	chr6	125096163	125130501	+	6384	1	Chd4|9530019N15Rik|AA617397|BC005710|D6Ertd380e|Mi-2beta|mKIAA4075|-|6 F2|6 59.28 cM|protein-coding	14.1629	14.1338	14.0263	14.0823	14.066	-0.104853	0.00209294	0.0237354
NM_028889	chr1	87264364	87310791	+	1799	1	Efhd1|4931430I01Rik|AI452351|PP3051|mitocalcin|-|1|1 C5|protein-coding	0	0	0	0	0	NA	1	1
NM_001256309	chr16	32804888	32810446	-	514	1	Gm933|Gm1743|-|16|16 B3|protein-coding	0	0	0	0	0	NA	1	1
NM_175514	chr2	83812728	83881358	+	3384	1	Fam171b|D430039N05Rik|-|2|2 D|protein-coding	8.81729	8.69867	8.73855	8.77969	8.78447	0.0266413	0.822313	0.974996
NM_178885	chr2	35084046	35100685	-	1712	1	AI182371|AI046667|-|2|2 B|protein-coding	0.832209	0.831237	0.83765	0.830193	0.831664	0.600551	0.719801	1
NM_146064	chr15	102150575	102163436	+	2109	1	Soat2|ACAT2|D15Wsu97e|-|15 F2|15 57.33 cM|protein-coding	4.86175	4.83361	4.8235	4.82457	4.81382	-0.647957	0.104478	0.477505
NM_018853	chr9	61913283	61914510	-	463	1	Rplp1|2410042H16Rik|Arpp1|C430017H15Rik|-|9|9 B|protein-coding	14.7568	14.7975	14.7986	14.7969	14.8357	0.0382029	0.233903	0.710174
NM_001033343	chr19	44516957	44545848	-	3895	1	Sec31b|Gm341|Sec31l2|-|19|19 C3|protein-coding	3.83871	3.85195	3.83328	3.84261	3.84273	-0.278736	0.62101	0.94202
NM_174876	chr16	56204313	56273753	+	6890	1	Impg2|IPM200|PG10.2|Rsbp|Spacrcan|-|16|16 C1.1|protein-coding	1.56762	1.56821	1.56978	1.5639	1.56689	-0.245784	0.83932	1
NM_020603	chr17	33940723	33949695	+	2147	1	Wdr46|2310007I04Rik|Bing4|C78447|C78559|-|17|17 B1|protein-coding	10.9693	10.9245	11.0253	10.9652	10.9745	0.0616676	0.283548	0.764466
NM_133184	chr10	76147451	76189265	+	2038	1	Slc5a4a|SGLT3-a|-|10|10 C1|protein-coding	0	0	0	0	0	NA	1	1
NM_029019	chr18	70472454	70501065	+	1484	1	Stard6|1700011K09Rik|4833424I06Rik|4933429L05Rik|AI644424|-|18 E2|18 44.44 cM|protein-coding	7.70619	7.69276	7.65171	7.65157	7.60427	-0.282194	0.0667488	0.35971
NR_028539	chr7	15938762	15938860	-	98	1	Snord23|MBII-115|-|7 A2|7|snoRNA	1.73007	1.72768	1.72475	1.72694	1.72794	-0.458959	0.684262	1
NM_001286103	chr19	8883878	8890759	+	1142	1	Lbhd1|Gm21743|-|19 A|19|protein-coding	10.0612	10.0698	10.0443	10.0372	10.0204	-0.0569529	0.415375	0.855399
NM_027263	chr4	149128349	149137600	-	923	1	Apitd1|2610040C18Rik|2810407L01Rik|CENP-S|-|4|4 E2|protein-coding	8.60397	8.60498	8.56424	8.56902	8.61395	-0.0624242	0.581511	0.933386
NM_172994	chr5	36868570	36955078	+	4020	1	Ppp2r2c|6330548O06Rik|IMYPNO|IMYPNO1|PR52|-|5|5 B3|protein-coding	-0.167464	-0.168226	-0.166132	-0.170962	-0.171023	-1.10611	0.633041	1
NM_207571	chr10	78875549	78880106	+	1145	1	Olfr1355|GA_x5J8B7W4DUT-12263-11330|MOR139-6|-|10|10 C1|protein-coding	0	0	0	0	0	NA	1	1
NM_026503	chr1	23995939	24005640	-	662	1	Sdhaf4|1110058L19Rik|1700001E18Rik|C6orf57|-|1|1 A5|protein-coding	8.3406	8.37232	8.40081	8.35196	8.34807	0.0313072	0.800805	0.973682
NM_019832	chr13	58233351	58274188	-	1504	1	Gkap1|42kDa|4933400B15Rik|D13Ertd340e|Gkap42|-|13 B1|13 30.97 cM|protein-coding	8.44056	8.46295	8.4473	8.40026	8.39458	-0.119254	0.318815	0.792654
NR_030261	chr12	109717258	109717333	+	75	1	Mir543|Mirn543|mir-543|mmu-mir-543|-|12 F1|12|ncRNA	0	0	0	0	0	NA	1	1
NM_053151	chr6	130115219	130129879	-	1127	1	Klra21|Klra-ps1|Ly49H|Ly49u|-|6|6 F3|protein-coding	0	0	0	0	0	NA	1	1
NM_001161798	chr4	148041189	148059562	+	6071	1	Mthfr|AI323986|-|4 E2|4 78.67 cM|protein-coding	9.58127	9.55519	9.52907	9.49484	9.50468	-0.120152	0.145049	0.575084
NM_026378	chr9	108569892	108572771	+	1723	1	Dalrd3|6330580J24Rik|C77829|mir-425|-|9|9 F2|protein-coding	9.41086	9.41931	9.39867	9.43493	9.39841	-0.00926515	0.914311	0.988977
NR_040311	chr7	79500026	79534403	+	3736	1	Mir9-3hg|AI854517|-|7|7 D2|ncRNA	-1.30846	-1.30698	-1.30883	-1.30905	-1.3075	-1.12278	0.747659	1
NM_024448	chr17	66494512	66519670	-	2002	1	Rab12|2900054P15Rik|AW555448|C77700|-|17|17 E1.1|protein-coding	11.1875	11.2866	11.2385	11.2123	11.2463	-0.0102432	0.856046	0.980015
NM_029686	chr8	116995679	117082449	-	7342	1	Pkd1l2|1700126L06Rik|-|8|8 E1|protein-coding	3.36634	3.36282	3.38748	3.38878	3.39072	2.48332	0.0058383	0.0567717
NM_177335	chr10	121641701	121693914	+	3412	1	D930020B18Rik|1500017I17Rik|-|10|10 D2|protein-coding	0	0	0	0	0	NA	1	1
NR_103800	chr12	96046621	96047222	-	601	1	1700019M22Rik|-|-|12|12 E|pseudo	0	0	0	0	0	NA	1	1
NM_080848	chr2	27515147	27536538	+	2887	1	Wdr5|2410008O07Rik|AA408785|AA960360|Big|Big-3|-|2|2 A3|protein-coding	11.9061	11.8881	11.9112	11.9109	11.8969	0.0124579	0.771042	0.97072
NM_026359	chr14	63971122	63987780	-	1027	1	4930578I06Rik|AI429111|-|14|14 D1|protein-coding	1.34087	1.33621	1.34028	1.33248	1.33394	-0.766923	0.563539	1
NM_173451	chr3	126363852	126440374	+	3686	1	Arsj|9330196J05Rik|D830047F08|-|3|3 G1|protein-coding	9.91457	9.87707	9.71951	9.67924	9.69535	-0.373185	1.08055e-06	2.30544e-05
NM_021789	chr9	44403759	44407548	-	1161	1	Trappc4|1500017G03Rik|AI303617|HSPC172|PTD009|Sbd|Sbdn|Sdcbp2|TRS23|-|9|9 A5.2|protein-coding	10.0819	10.0732	10.1023	10.0975	10.1134	0.0479505	0.487413	0.890749
NM_026172	chr4	15917240	15945507	-	2947	1	Decr1|1200012F07Rik|Decr|Nadph|-|4|4 A2|protein-coding	10.1389	10.1887	10.188	10.1413	10.1548	-0.006926	0.921396	0.98994
NM_133231	chr3	54803115	54807791	-	2157	1	Rfxap|5730495K23Rik|-|3|3 C|protein-coding	9.62632	9.5445	9.59687	9.53577	9.58082	-0.0278419	0.750433	0.966878
NM_007653	chr10	128909866	128912818	+	889	1	Cd63|C75951|ME491|Tspan30|-|10 D3|10 77.19 cM|protein-coding	12.6201	12.6096	12.5901	12.6926	12.658	0.0414658	0.358259	0.818345
NR_033221	chr16	38085064	38089260	-	4196	1	BC031361|-|-|16 B3|16|ncRNA	6.20645	6.22486	6.2254	6.23521	6.25385	0.237761	0.350248	0.813034
NM_133747	chr17	75537086	75551946	-	2807	1	Fam98a|2810405J04Rik|AL024114|-|17|17 E2|protein-coding	10.9743	10.8622	10.8455	10.8458	11.0107	-0.0225592	0.77997	0.972001
NM_010460	chr11	96286646	96290163	+	1265	1	Hoxb7|AI325018|Hox-2.3|-|11 D|11 59.82 cM|protein-coding	2.36571	2.36001	2.36141	2.36963	2.36135	0.182163	0.849324	0.978663
NM_025822	chr3	66985672	67358403	+	3220	1	Rsrc1|1200013F24Rik|SRrp53|-|3|3 E1|protein-coding	12.1141	12.0724	12.0935	12.0923	12.1031	0.0048243	0.9084	0.988406
NM_024258	chr16	87454985	87483513	+	2899	1	Usp16|1200004E02Rik|2810483I07Rik|6330514E22Rik|UBPM|-|16|16 C3.3|protein-coding	11.2876	11.3246	11.2829	11.2767	11.3142	-0.02156	0.672786	0.950396
NM_022315	chr17	14279506	14404790	+	2817	1	Smoc2|1700056C05Rik|5430426J21Rik|Smoc2l|-|17 A2|17 8.95 cM|protein-coding	2.59322	2.59253	2.59152	2.60121	2.59951	0.569596	0.530995	0.915994
NM_001198867	chr6	83165924	83200117	+	4085	1	Dctn1|AL022633|DAP-150|DP-150|Glued|p150|p150-glued|p150<glued>|-|6 C3|6 35.94 cM|protein-coding	12.0729	12.0447	12.0354	12.0143	12.0564	-0.029471	0.494002	0.893933
NM_174990	chr6	48684578	48692062	+	1805	1	Gimap4|AU019574|E430007K16Rik|Ian-1|Ian1|Imap4|-|6|6 B2.3|protein-coding	0.816973	0.821139	0.818579	0.821366	0.822529	0.755465	0.66262	1
NM_146530	chr2	88525501	88526590	+	1087	1	Olfr1186|MOR230-5|-|2|2 D|protein-coding	0	0	0	0	0	NA	1	1
NM_010114	chr7	44112673	44116922	+	848	1	Klk1b22|EGF-BP A|Egfbp-1|Egfbp1|Klk22|mGk-22|-|7 B3|7 28.61 cM|protein-coding	0	0	0	0	0	NA	1	1
NM_029924	chr2	48949508	49317069	+	7036	1	Mbd5|9430004D19Rik|AA536666|AI426407|C030040A15Rik|Gm1630|OTTMUSG00000012483|-|2|2 C1.1|protein-coding	9.1118	9.13917	9.06074	9.16728	9.00908	-0.106569	0.353609	0.815603
NM_008534	chr1	171588613	171607410	-	2487	1	Ly9|AI893573|CD229|Lgp100|Ly-9|SLAMF3|T100|-|1 H3|1 79.54 cM|protein-coding	0	0	0	0	0	NA	1	1
NM_054081	chr12	113098278	113137206	+	2753	1	Mta1|-|-|12|12 F1|protein-coding	12.9866	12.9723	12.9861	12.9332	12.9938	-0.00977498	0.80029	0.973682
NM_175179	chrX	95420314	95444840	-	8464	1	Amer1|2810002O09Rik|AW492303|Fam123b|Wtx|-|X|X C3|protein-coding	10.2365	10.1916	10.127	10.1829	10.1465	-0.104367	0.13688	0.558449
NM_001080974	chr5	8056542	8069314	+	2389	1	Sri|2210417O06Rik|2900070H08Rik|Sor|-|5 A1|5 3.38 cM|protein-coding	11.3519	11.3897	11.3994	11.3691	11.3517	0.00179307	0.971764	0.994443
NR_045910	chr12	52599984	52602322	-	301	1	1700031P21Rik|-|-|12|12 C1|ncRNA	0	0	0	0	0	NA	1	1
NM_011206	chr1	34459746	34473779	+	1556	1	Ptpn18|FLP1|HSCF|PTP-HSCF|PTP-K1|Ptpk1|-|1 B|1 13.25 cM|protein-coding	-1.86719	-1.86733	-1.86737	-1.86748	-1.86672	0.260813	0.95441	1
NM_144517	chr5	53809627	53904380	+	2665	1	Tbc1d19|2810453K03Rik|-|5|5 C1|protein-coding	9.92973	9.944	9.8733	9.91072	9.86587	-0.0988871	0.182553	0.644999
NM_009799	chr3	14766214	14808365	-	1186	1	Car1|AW555628|Ca1|Car-1|-|3 A1|3 3.18 cM|protein-coding	-1.86719	-1.86733	-1.86737	-1.86748	-1.86672	0.260813	0.95441	1
NM_001167149	chr7	20121656	20122579	-	922	2	Gm16451|EG667454|Vmn1r140|-|7|7 A3|protein-coding	0	0	0	0	0	NA	1	1
NM_146452	chr7	106688782	106689729	-	946	1	Olfr694|MOR283-9|-|7|7 E3|protein-coding	0	0	0	0	0	NA	1	1
NM_021713	chr15	102331709	102338138	+	1470	1	Myg1|0610023A07Rik|2810433J21Rik|5830429P19Rik|AI325965|Gamm1|-|15|15 F3|protein-coding	10.65	10.6398	10.6931	10.6556	10.6934	0.0561466	0.346499	0.810742
NM_019678	chr16	56690329	56717450	-	1938	1	Tfg|AI173908|-|16|16 C1.1|protein-coding	11.5853	11.5789	11.6456	11.6204	11.6004	0.0537824	0.253452	0.732761
NM_172739	chr7	16494473	16614993	-	8384	1	Arhgap35|6430596G11Rik|AI841135|Grlf1|mKIAA1722|p190A|p190RhoGAP|-|7|7 A2|protein-coding	13.3489	13.3075	13.3154	13.3711	13.3013	0.00205532	0.958204	0.992083
NM_001105058	chr7	42260053	42300755	+	2591	1	Vmn2r61|Casr-rs2|EG637873|Gprc2a-rs2|-|7|7 B3|protein-coding	0	0	0	0	0	NA	1	1
NR_045059	chr14	44954900	44961307	-	2276	1	4930431P03Rik|-|-|14|14 C1|ncRNA	1.60094	1.59916	1.60085	1.60086	1.60186	0.275069	0.821489	1
NM_001347063	chr1	72642980	72700579	-	4559	1	Ankar|4932422E22Rik|-|1|1 C3|protein-coding	-1.86719	-1.86734	-1.86738	-1.86663	-1.86755	0.260813	0.95441	1
NM_026508	chr16	4039977	4077810	-	2277	1	Trap1|2410002K23Rik|HSP75|-|16 A1|16 2.38 cM|protein-coding	12.5897	12.5725	12.6016	12.6162	12.6155	0.0378598	0.307973	0.783915
NR_105776	chr18	76170552	76170652	+	100	1	Mir6358|Gm27830|mmu-mir-6358|-|18|18 E3|ncRNA	0	0	0	0	0	NA	1	1
NM_021525	chr19	29101375	29143843	+	1792	1	Rcl1|2310040A02Rik|AI789745|C76567|RPCL1|Rnac|-|19|19 C1|protein-coding	10.2689	10.3117	10.2613	10.2186	10.2979	-0.0529494	0.452187	0.875044
NM_172704	chr4	151933720	151981959	+	2926	1	Dnajc11|E030019A03Rik|-|4|4 E2|protein-coding	11.0047	11.0961	11.1394	11.144	11.1467	0.130999	0.0210614	0.15761
NR_040595	chr3	33024777	33088607	+	1050	1	4930419G24Rik|-|-|3|3 A3|ncRNA	0	0	0	0	0	NA	1	1
NM_001081072	chr18	58556240	58612869	+	2586	1	Slc27a6|4732438L20Rik|FACVL2|FATP6|VLCS-H1|-|18|18 D3|protein-coding	0	0	0	0	0	NA	1	1
NR_037306	chr4	3537090	3537191	+	101	1	Mir3471-2|mmu-mir-3471-2|-|4 A1|4 1.97 cM|ncRNA	-0.416134	-0.41403	-0.414229	-0.41477	-0.414938	0.350508	0.885158	1
NM_001039125	chr14	62998077	63001160	+	355	1	Defb47|Defb41|EG654465|-|14 D1|14|protein-coding	0	0	0	0	0	NA	1	1
NM_133699	chr12	17284721	17324730	-	1551	1	Atp6v1c2|1110038G14Rik|-|12|12 A1.1|protein-coding	6.02709	6.00404	6.02408	6.0493	6.05151	0.3194	0.24595	0.723379
NM_025435	chr14	13949012	13961313	-	963	1	Thoc7|Nif3l1bp1|-|14|14 A1|protein-coding	11.2484	11.2577	11.2565	11.2372	11.243	-0.0111571	0.823305	0.974996
NM_001271883	chr17	18049484	18074220	+	2561	1	Vmn2r124|EG637021|Gm7196|Vmn2r-ps113|-|17|17 A3.2|protein-coding	-1.26938	-1.26967	-1.26802	-1.26831	-1.26998	1.25621	0.719277	1
NM_145371	chr5	124570214	124579131	-	2001	1	Eif2b1|D5Ertd406e|EIF2BA|-|5 F|5 63.67 cM|protein-coding	10.8328	10.8034	10.8428	10.8575	10.8518	0.0503438	0.36983	0.827413
NM_176996	chr6	29735497	29761366	+	3963	1	Smo|E130215L21Rik|Smoh|bnb|smoothened|-|6 A3.3|6 12.36 cM|protein-coding	12.4483	12.4721	12.4663	12.4722	12.4709	0.0114674	0.763225	0.969043
NM_028093	chr2	25080323	25085719	+	2294	1	Entpd8|-|-|2|2 A3|protein-coding	-1.32544	-1.32568	-1.32576	-1.3245	-1.32462	1.03725	0.781125	1
NR_045053	chr13	28460034	28885422	-	2494	1	2610307P16Rik|AI666457|-|13|13 A3.1|ncRNA	-0.0577156	-0.0590328	-0.0641849	-0.0644071	-0.064477	-4.15435	0.0627603	1
NM_134007	chr10	71330494	71344849	-	960	1	Cisd1|AU043990|AW743335|D10Ertd214e|Zcd1|mitoNEET|-|10 B5.3|10 36.88 cM|protein-coding	10.3668	10.4096	10.4056	10.3785	10.4433	0.0335866	0.615472	0.941609
NM_025597	chr1	58586397	58595964	+	745	1	Ndufb3|2700033I16Rik|CI-B12|-|1|1 C1.3|protein-coding	11.1651	11.2366	11.2168	11.1878	11.2562	0.0258973	0.647045	0.945413
NM_001033426	chr18	41985323	41999049	-	1993	1	Grxcr2|Gm851|-|18|18 B3|protein-coding	0	0	0	0	0	NA	1	1
NR_028280	chr17	8340406	8344113	+	3406	1	Prr18|9630019K15Rik|-|17|17 A1|protein-coding	3.00749	3.00529	3.00164	3.01595	3.00867	0.21622	0.780411	0.972001
NM_028446	chr12	101837372	101913171	-	6425	1	Trip11|2610511G22Rik|3110031G15Rik|6030460N08Rik|AI450776|GMAP-210|TRIP230|-|12|12 E|protein-coding	11.559	11.4891	11.4777	11.4936	11.4592	-0.0635363	0.208699	0.674624
NM_001164497	chr8	88199213	88259722	+	4609	1	Papd5|5730445M16Rik|5830428A09|-|8|8 C3|protein-coding	11.1854	11.1783	11.0619	11.0339	11.0612	-0.186273	0.000340512	0.00481129
NR_027008	chr6	113070399	113077244	-	1212	1	Gt(ROSA)26Sor|AV258896|Gtrgeo26|Gtrosa26|R26|ROSA26|Thumpd3as1|-|6 E3|6 52.73 cM|ncRNA	8.81334	8.82204	8.88385	8.8613	8.88898	0.159343	0.122114	0.524477
NM_201352	chr7	99381549	99460984	+	3563	1	Gdpd5|BC024955|Gde2|-|7|7 E1|protein-coding	8.32316	8.30988	8.34339	8.32812	8.30505	0.0294846	0.810096	0.973682
NM_183115	chr13	100669481	100697240	+	2691	1	Ccdc125|5830436D01Rik|AL023012|-|13|13 D1|protein-coding	3.59285	3.59097	3.59533	3.59538	3.59931	0.288912	0.640295	0.943711
NM_146956	chr7	140322701	140323630	+	928	1	Olfr525|MOR251-2|-|7|7 F4|protein-coding	0	0	0	0	0	NA	1	1
NM_175105	chr7	97726379	97738247	-	1317	1	Aqp11|1700015P13Rik|AI648923|sjds|-|7|7 E1|protein-coding	6.25401	6.21215	6.25006	6.24284	6.24718	0.142999	0.573897	0.93214
NR_029593	chr1	20679010	20679082	+	72	1	Mir206|Mirn206|mmu-mir-206|-|1|1 A4|ncRNA	-1.86719	-1.86734	-1.86738	-1.86663	-1.86755	0.260813	0.95441	1
NM_011340	chr11	75410029	75422623	-	1484	1	Serpinf1|AI195227|EPC-1|Pedf|Pedfl|Sdf3|-|11|11 B5|protein-coding	4.68648	4.67159	4.66863	4.66141	4.66308	-0.397228	0.338507	0.807215
NM_001110328	chr7	5007056	5014697	-	2651	1	Fiz1|AI790204|mFLJ00416|-|7|7 A1|protein-coding	10.2695	10.2884	10.2384	10.2697	10.2988	-0.0159617	0.813773	0.973806
NM_008206	chr17	34092379	34095234	+	1042	1	H2-Oa|H-2Oa|-|17 B1|17 17.98 cM|protein-coding	0.299397	0.303392	0.296035	0.295776	0.299181	-2.31771	0.25248	1
NM_023065	chr8	70762773	70766663	-	971	1	Ifi30|GILT|IP30|-|8|8 B3.3|protein-coding	10.6841	10.6305	10.83	10.8011	10.8295	0.252278	2.20216e-05	0.000385503
NM_008217	chr8	106870242	106882902	+	5906	1	Has3|-|-|8 D3|8 53.28 cM|protein-coding	7.34047	7.27853	7.23487	7.31511	7.2431	-0.24344	0.21166	0.678383
NM_027641	chr2	131170261	131174810	-	2255	1	Spef1|4931426K16Rik|Clamp|-|2 F1|2|protein-coding	8.85897	8.85001	8.8488	8.87996	8.85833	0.0217212	0.83171	0.976155
NR_002848	chr12	109591537	109592851	+	1314	1	6430411K18Rik|PEG11as|-|12|12 F1|ncRNA	-1.86719	-1.86733	-1.86737	-1.86748	-1.86672	0.260813	0.95441	1
NM_146359	chr7	102803480	102804430	+	949	1	Olfr564|MOR14-10|-|7|7 E3|protein-coding	0	0	0	0	0	NA	1	1
NM_001290796	chr2	119218119	119229865	-	804	1	Ppp1r14d|2010107K19Rik|GBPI-1|Ppp1r14|-|2|2 E5|protein-coding	1.65171	1.64882	1.64341	1.64004	1.64497	-1.51153	0.196755	1
NM_053204	chr6	119570796	119848150	-	8737	1	Erc1|4930404L01Rik|5033405M01Rik|9630025C19Rik|B430107L16Rik|CAST2|ELKS|Elks1|RAB6IP2A|RAB6IP2B|Rab6ip2|mKIAA1081|-|6|6 F1|protein-coding	11.3458	11.3321	11.3318	11.459	11.3318	0.0518474	0.405692	0.849994
NR_132443	chr13	51200084	51203066	-	2982	1	Hist1h2al|EG667728|-|13|13 A5|pseudo	12.0293	12.0253	11.9619	11.9828	11.9924	-0.062073	0.141238	0.566785
NM_027901	chr5	31156006	31180144	-	4530	1	Gtf3c2|1300004C11Rik|2610510G03Rik|AI225816|AU041069|TFIIIC110|mKIAA0011|-|5|5 B1|protein-coding	11.2597	11.128	11.1712	11.2681	11.3026	0.0778812	0.264351	0.745102
NM_020581	chr17	33774900	33781575	-	1894	1	Angptl4|Arp4|Bk89|Fiaf|Hfarp|Ng27|Pgar|Pgarg|Pp1158|-|17|17 B1|protein-coding	9.9697	10.0384	9.68978	9.68607	9.75452	-0.544708	8.94091e-12	3.16636e-10
NM_001270553	chr8	20614927	20640703	+	2502	2	Gm21119|-|-|8 A2|8|protein-coding	-1.86719	-1.86737	-1.86631	-1.86759	-1.86764	0.260813	0.95441	1
NM_001081256	chr18	34777008	34839370	+	7086	1	Kdm3b|5830462I21Rik|JHDM2B|Jmjd1b|mKIAA1082|-|18|18 B1|protein-coding	11.0754	11.0636	11.0864	11.1657	11.0975	0.0696632	0.221647	0.69306
NM_001199186	chr9	21320719	21355028	+	3433	1	Slc44a2|1110028E10Rik|CTL2|-|9|9 A3|protein-coding	12.2802	12.3101	12.2232	12.2568	12.2296	-0.0748877	0.0668136	0.359748
NM_011906	chr6	88902251	88912240	+	1815	1	Tpra1|40kDa|Gpr175|Tpra40|-|6|6 D1|protein-coding	9.72216	9.75324	9.7019	9.67717	9.67806	-0.103297	0.185064	0.647317
NM_027063	chr4	137453296	137455461	+	1032	1	1700013G24Rik|AI507018|-|4|4 D3|protein-coding	0	0	0	0	0	NA	1	1
NM_025362	chr5	135064206	135065365	+	1157	1	Dnajc30|1300007M11Rik|Wbscr18|-|5|5 G2|protein-coding	8.27305	8.31081	8.32393	8.3425	8.33209	0.133985	0.278883	0.760325
NM_001163186	chr7	100643896	100656965	-	1897	1	Plekhb1|AI315628|PHR1|Phret1|evt-1|-|7|7 E2|protein-coding	4.8463	4.84163	4.83549	4.81337	4.82667	-0.45621	0.251002	0.729373
NM_146677	chr10	130162362	130163324	-	961	1	Olfr825|MOR210-1|-|10|10 D3|protein-coding	0	0	0	0	0	NA	1	1
NM_172589	chr13	94057796	94195409	+	4342	1	Lhfpl2|6030465B15|AI447312|AW050335|mKIAA0206|vgim|-|13|13 C3|protein-coding	12.6045	12.6173	12.2952	12.3191	12.3022	-0.382325	1.26748e-23	8.12538e-22
NM_019588	chr19	38524197	38785100	+	9475	1	Plce1|4933403A21Rik|PLCepsilon|Plce|mKIAA1516|-|19|19 C3|protein-coding	2.59214	2.5886	2.58977	2.5938	2.59399	0.262706	0.763898	0.96932
NR_046307	chr14	22507174	22542798	-	972	1	4930405A10Rik|4930456G20Rik|-|14|14 A3|ncRNA	0	0	0	0	0	NA	1	1
NM_001081302	chr15	27730649	28025848	-	11438	1	Trio|6720464I07Rik|AA408740|Solo|-|15|15 B1|protein-coding	12.9035	12.8387	12.7716	12.8638	12.7673	-0.0847004	0.0740409	0.383405
NM_025685	chr4	63215412	63334990	+	7571	1	Col27a1|5730512J02Rik|AI449266|-|4|4 B3|protein-coding	3.97051	3.97029	4.00259	4.01583	4.00623	2.5414	0.000596806	0.00796912
NR_037666	chr16	4935164	4939585	-	1528	1	Gm16861|-|-|16 A1|16 2.48 cM|ncRNA	7.79702	7.79889	7.74998	7.77146	7.77562	-0.135248	0.350593	0.813144
NM_009693	chr12	7977677	8016839	+	13878	1	Apob|AI315052|Apo B-100|apob-100|apob-48|-|12 A1.1|12 3.53 cM|protein-coding	3.92283	3.93306	3.91648	3.93408	3.91691	-0.247472	0.657329	0.947438
NR_131920	chr4	86558444	86559804	+	628	1	Saxo1os|4930457A20Rik|Fam154aos|-|4|4 C4|ncRNA	0	0	0	0	0	NA	1	1
NM_001310620	chr7	12478305	12496235	+	4790	1	Zfp606|2410022M24Rik|AW494727|-|7|7 A1|protein-coding	10.0344	10.0362	10.0242	10.0068	9.95461	-0.0726734	0.324893	0.799785
NM_019976	chr3	108383838	108388231	+	1729	1	Psrc1|5430413I02Rik|AL033312|Dda3|-|3|3 F3|protein-coding	9.99429	10.0206	9.99134	9.98076	9.96254	-0.054436	0.447316	0.87313
NR_040443	chr4	137159082	137165066	-	2900	1	Gm13003|OTTMUSG00000009822|-|4 D3|4 69.52 cM|ncRNA	-1.29322	-1.29347	-1.29354	-1.29077	-1.29375	1.08189	0.794161	1
NM_212433	chr2	104027799	104063237	+	4646	1	Fbxo3|1200002G09Rik|1700026K02Rik|AI046358|Fba|-|2|2 E2|protein-coding	11.184	11.2429	11.2153	11.2168	11.2456	0.016063	0.761689	0.968624
NM_001162479	chr9	58134665	58153997	+	2851	1	Stra6|AI891933|-|9|9 B|protein-coding	-1.86561	-1.86744	-1.86751	-1.86774	-1.86781	-2.30448	0.573731	1
NM_001045807	chr3	107326110	107333289	-	3266	1	Rbm15|C230088J01Rik|mKIAA1438|-|3|3 F2.3|protein-coding	11.023	10.9429	11.1013	11.2085	11.1614	0.256424	4.41695e-05	0.000740454
NM_183109	chr15	100280837	100293053	+	1342	1	Tmprss12|4930478A21Rik|-|15|15 F1|protein-coding	-1.86719	-1.86733	-1.86737	-1.86748	-1.86672	0.260813	0.95441	1
NM_007424	chr7	79053483	79115099	+	7336	1	Acan|Agc|Agc1|Cspg1|b2b183Clo|cmd|-|7 D2|7 44.88 cM|protein-coding	-0.329286	-0.330011	-0.332493	-0.33266	-0.329235	-1.4202	0.554421	1
NM_177867	chr4	141088345	141112759	+	2496	1	Spata21|4933414G08|-|4|4 D3|protein-coding	3.17649	3.18338	3.18127	3.16829	3.18377	-0.164775	0.82151	0.974996
NM_033561	chr5	134619872	134639409	-	2485	1	Eif4h|AU018978|D5Ertd355e|E430026L18Rik|Ef4h|Wbscr1|Wscr1|eIF-4H|-|5 G2|5 74.71 cM|protein-coding	14.0111	14.0985	14.1144	14.0996	14.109	0.0602964	0.10477	0.478478
NM_009714	chr11	70054355	70057895	+	1249	1	Asgr1|ASGPR1|Asgr|Asgr-1|HL-1|-|11 B3|11 42.98 cM|protein-coding	3.84392	3.85256	3.8472	3.84424	3.84792	-0.0902481	0.871192	0.98386
NR_030428	chr7	127708487	127708562	+	75	1	Mir762|Mirn762|mir-762|mmu-mir-762|-|7 F3|7|ncRNA	5.87648	5.8478	5.86871	5.87005	5.86717	0.0869909	0.759259	0.968447
NR_105893	chr11	101030340	101030409	+	69	1	Mir6928|Gm27728|mmu-mir-6928|-|11|11 D|ncRNA	-0.416134	-0.41403	-0.414229	-0.41477	-0.414938	0.350508	0.885158	1
NM_133906	chr5	138085084	138107822	+	8253	1	Zkscan1|5930429A01Rik|9130423L19Rik|9230118B16Rik|AI646829|AI788588|C87323|KOX18|PHZ-37|ZNF139|-|5|5 G2|protein-coding	11.9118	11.857	11.8357	11.8837	11.8689	-0.0267412	0.564998	0.929787
NM_145393	chr4	132184916	132212256	-	4071	1	Ythdf2|9430020E02Rik|HGRG8|NY-REN-2|-|4|4 D2.3|protein-coding	12.0643	12.0846	12.1555	12.1623	12.1691	0.112685	0.00586149	0.0569573
NM_024286	chr10	45289305	45318450	+	1845	1	Popdc3|AA682104|Pop3|-|10 B2|10 23.35 cM|protein-coding	0	0	0	0	0	NA	1	1
NR_040709	chr14	64588115	64593961	+	4035	1	Mir124a-1hg|A930011O12Rik|Rncr3|mir-124-1|mir-3078|-|14|14 D1|ncRNA	0	0	0	0	0	NA	1	1
NM_173187	chr1	105663861	105755131	+	5375	1	2310035C23Rik|6430401N10|Kiaa1468|mKIAA1468|-|1 E2.1|1|protein-coding	11.8922	11.8703	11.778	11.8058	11.7565	-0.132951	0.00336276	0.0357636
NM_175366	chr7	82867333	82871576	+	3412	1	Mex3b|4931439A04Rik|M-04814|Rkhd3|mKIAA2009|-|7 D3|7 47.35 cM|protein-coding	8.97638	8.96725	9.0653	8.99722	9.07984	0.189617	0.0676219	0.362509
NR_038299	chrY	30497729	30523759	+	804	4	Gm20871|-|-|Y|Y C2|pseudo	0	0	0	0	0	NA	1	1
NM_001111030	chr2	58267453	58357758	-	9014	1	Acvr1c|ACTR-IC|ACVRLK7|ALK7|Alk-7|C230097P10|-|2|2 C1.1|protein-coding	5.60554	5.623	5.62364	5.6092	5.62297	0.0632799	0.837343	0.976797
NM_019802	chr6	72414308	72431106	+	3306	1	Ggcx|-|-|6|6 C1|protein-coding	9.5954	9.62578	9.61426	9.56807	9.60725	-0.0298759	0.715878	0.961719
NM_009143	chr11	78245746	78255496	+	1263	1	Sdf2|AI853825|-|11|11 B5|protein-coding	10.051	10.1097	10.1126	10.0599	10.0852	0.00678812	0.925677	0.990382
NM_001313743	chrX	95470199	95557987	-	1446	1	Asb12|2310036C05Rik|Asb-12|-|X|X C3|protein-coding	-1.32544	-1.32568	-1.32576	-1.3245	-1.32462	1.03725	0.781125	1
NM_029489	chr3	30746293	30767174	+	3181	1	Samd7|4930597A01Rik|-|3|3 A3|protein-coding	-1.26839	-1.27082	-1.27092	-1.26919	-1.2712	-1.30551	0.685916	1
NM_001101507	chr6	38663069	38680865	+	1422	1	Clec2l|AI414054|AW122724|Gm1064|-|6|6 B1|protein-coding	0.00448809	0.00425481	0.00629926	0.00745026	0.00875126	2.67849	0.248814	1
NM_207227	chr11	52144593	52145528	-	934	1	Olfr1373|GA_x6K02T2QP88-3283154-3284089|-|11|11 B1.3|protein-coding	1.83878	1.83393	1.84008	1.83918	1.83135	0.102895	0.929352	1
NM_001101600	chr9	59951294	59959044	+	609	1	Gm7616|EG665389|-|9|9 B|protein-coding	-1.26839	-1.27082	-1.27092	-1.26919	-1.2712	-1.30551	0.685916	1
NM_001243092	chr9	78257129	78269166	+	865	1	Gm3776|-|-|9 E1|9|protein-coding	4.65703	4.64623	4.65729	4.67514	4.67848	0.575477	0.200519	0.668412
NR_040753	chr9	120924455	120930802	-	580	1	4930593C16Rik|-|-|9|9 F4|ncRNA	0	0	0	0	0	NA	1	1
NM_199201	chr11	115042131	115048295	-	733	2	Cd300ld3|AY457049|Cd300lh|Clm3|Lmir7|clm-3|-|11|11 E2|protein-coding	-1.86719	-1.86737	-1.86631	-1.86759	-1.86764	0.260813	0.95441	1
NM_025815	chr15	90487481	90679388	-	3302	1	Cpne8|1200003E11Rik|1500031E20Rik|-|15|15 E3|protein-coding	10.4008	10.4623	10.5586	10.5376	10.5701	0.19745	0.00217645	0.0245818
NR_045619	chr13	94356749	94358923	-	2174	1	Gm9776|A530089L17|ENSMUSG00000042857|-|13 C3|13|ncRNA	5.2004	5.19147	5.1693	5.1747	5.19981	-0.282112	0.435745	0.867471
NM_032000	chr15	50654759	50890041	-	10194	1	Trps1|AI115454|AI447310|D15Ertd586e|-|15 C|15 19.18 cM|protein-coding	12.5557	12.5056	12.3856	12.4529	12.3385	-0.171993	0.000489052	0.006685
NM_013729	chr1	180693048	180697034	-	2285	1	Mixl1|Mm1|Mml|-|1|1 H4|protein-coding	1.95839	1.95694	1.96514	1.96245	1.96976	2.01059	0.136914	1
NM_019726	chr11	69914192	69916591	+	1208	1	Gps2|AI505953|-|11|11 B3|protein-coding	9.46914	9.44455	9.48433	9.46449	9.5018	0.0575539	0.497259	0.894947
NM_028810	chr2	51130439	51149111	-	2820	1	Rnd3|2610017M01Rik|AI661404|Arhe|Rhoe|-|2|2 C1.1|protein-coding	10.8788	10.8466	11.1549	11.1008	11.1079	0.381972	1.39776e-11	4.87527e-10
NR_045878	chr16	30021842	30039479	-	1205	1	9030404E10Rik|-|-|16|16 B2|ncRNA	-1.32544	-1.32568	-1.32576	-1.3245	-1.32462	1.03725	0.781125	1
NM_016673	chr4	41657498	41697091	-	1966	1	Cntfr|Cntfralpha|-|4 A5|4 21.81 cM|protein-coding	0	0	0	0	0	NA	1	1
NM_198012	chr7	102677585	102687327	-	2376	1	Trim68|AI894158|F730114J12Rik|Rnf137|SS-56|-|7|7 E3|protein-coding	7.3864	7.43206	7.36679	7.43598	7.41439	-0.0178836	0.919984	0.989698
NM_153504	chr4	62427542	62434726	-	1399	1	Rnf183|5830442J12Rik|-|4|4 B3|protein-coding	3.84925	3.82635	3.82605	3.83332	3.82671	-0.430826	0.450784	0.874785
NM_013899	chr2	84827021	84830213	+	661	1	Timm10|Tim13|Timm13a|-|2|2 D|protein-coding	9.45092	9.49417	9.48696	9.51028	9.5058	0.0581153	0.491932	0.893517
NM_001310709	chr5	110344730	110356094	+	829	1	Lrcol1|Clpsl3|Gm1679|-|5|5 F|protein-coding	-1.26944	-1.26793	-1.26983	-1.26832	-1.27006	-1.12315	0.744474	1
NR_028101	chr15	34440506	34443233	-	473	1	Gm12191|OTTMUSG00000005566|-|11|11 B1.2|pseudo	13.8909	13.9106	13.8644	13.8812	13.912	-0.0173031	0.60278	0.938011
NM_001160410	chr2	152081529	152095802	+	3391	1	Scrt2|AW060659|-|2|2 G3|protein-coding	-0.531852	-0.532115	-0.530045	-0.530559	-0.529115	2.12216	0.416821	1
NM_001048207	chr18	32528320	32560034	-	2177	1	Gypc|0610037F22Rik|Cd236r|-|18 B1|18 18.05 cM|protein-coding	0	0	0	0	0	NA	1	1
NM_001164523	chr9	78311972	78314797	-	605	1	Omt2a|OM2a|-|9 E1|9 43.65 cM|protein-coding	0	0	0	0	0	NA	1	1
NM_172625	chr18	24104761	24121819	-	2353	1	Ino80c|D030070L09Rik|-|18|18 A2|protein-coding	10.027	10.0775	10.1293	10.1714	10.0831	0.132439	0.0818693	0.410146
NM_008133	chr14	34310727	34345033	+	3143	1	Glud1|AI118167|Gdh-X|Glud|Gludl|-|14 B|14 20.8 cM|protein-coding	13.097	13.1078	13.1051	13.1042	13.0915	-0.00289598	0.931918	0.990382
NM_207244	chr16	44820728	44839150	+	1692	1	Cd200r4|F630107N04Rik|MCD200RLa|-|16|16 B4|protein-coding	0	0	0	0	0	NA	1	1
NM_001115153	chr5	149184560	149215434	+	3922	1	Uspl1|E430026A01Rik|-|5|5 G3|protein-coding	10.7767	10.7647	10.8104	10.8185	10.802	0.060623	0.283245	0.764206
NM_138606	chrX	7878306	7883432	+	2033	1	Pim2|DXCch3|Pim-2|-|X A1.1|X 3.55 cM|protein-coding	7.06159	7.07954	7.05072	7.05832	7.05631	-0.0975299	0.596334	0.9376
NM_017472	chr10	42502054	42535369	+	1371	1	Snx3|SDP3|-|10 B2|10 22.89 cM|protein-coding	11.7026	11.6802	11.6906	11.6607	11.6799	-0.0189273	0.677962	0.951155
NM_001285446	chr2	154436484	154539356	+	6063	1	Cbfa2t2|A430091M07|C330013D05Rik|Cbfa2t2h|MTGR1|-|2|2 H1|protein-coding	11.092	11.0827	11.0898	11.109	11.1003	0.018472	0.722618	0.962244
NM_078478	chr14	37120445	37135322	-	2894	1	Ghitm|1010001P14Rik|C77840|MICS1|PTD010|Tmbim5|-|14 B|14 21.29 cM|protein-coding	12.7937	12.8241	12.8192	12.8468	12.8281	0.027123	0.460605	0.879053
NM_146860	chr16	3592398	3593339	+	940	1	Olfr161|MOR131-1|OR912-47M6|-|16|16 A1|protein-coding	0	0	0	0	0	NA	1	1
NM_178376	chr4	86575673	86577283	+	1608	1	Rraga|1300010C19Rik|AI255374|FIP-1|RAGA|-|4|4 C4|protein-coding	10.9688	10.8995	10.9661	10.9571	10.985	0.0538989	0.344761	0.810069
NM_001290623	chr4	94907267	94928843	-	1153	1	Eqtn|1700028B15Rik|4930579C15Rik|Afaf|C81058|Eqtl|Eqts|-|4|4 C5|protein-coding	0.636258	0.637725	0.635084	0.636198	0.63585	-0.54244	0.737671	1
NM_009526	chr1	74771892	74785319	+	2062	1	Wnt6|AA409270|Wnt-6|-|1|1 C4|protein-coding	0	0	0	0	0	NA	1	1
NM_001281525	chr5	26018421	26022891	-	798	1	Gm5862|EG545739|-|5|5 B1|protein-coding	0	0	0	0	0	NA	1	1
NM_011010	chr7	98143359	98145447	-	2086	1	Omp|-|-|7 E1|7 53.59 cM|protein-coding	5.23694	5.25301	5.24929	5.2408	5.23294	-0.0797311	0.818828	0.974332
NR_030577	chr5	64970318	64970395	+	77	1	Mir574|Mirn574|mir-574|mmu-mir-574|-|5 C3.1|5|ncRNA	-1.30846	-1.30698	-1.30883	-1.30905	-1.3075	-1.12278	0.747659	1
NM_001195596	chr10	25527943	25536272	-	670	1	Smlr1|2010003K15Rik|-|10|10 A4|protein-coding	-0.880561	-0.88091	-0.878914	-0.881069	-0.877978	1.71815	0.582914	1
NM_001163145	chr15	84379203	84447097	-	5910	1	1810041L15Rik|Kiaa1644|-|15|15 E2|protein-coding	2.46504	2.46601	2.48686	2.48503	2.47179	3.6771	0.0216669	0.16087
NM_145479	chr16	17759621	17793382	+	2609	1	Klhl22|2610318I18Rik|Kelchl|-|16 A3|16 11.01 cM|protein-coding	12.7597	12.7604	12.6295	12.6205	12.5838	-0.184107	1.41412e-06	2.96687e-05
NM_007377	chr11	120007316	120047145	-	5675	1	Aatk|AATYK|aatyk1|mKIAA0641|-|11|11 E2|protein-coding	3.94309	3.91425	3.91611	3.92641	3.91091	-0.48501	0.396939	0.845065
NR_029743	chr1	74394310	74394394	+	84	1	Mir26b|Mirn26b|mir-26b|mmu-mir-26b|-|1|1 C3|ncRNA	3.04199	3.04493	3.05423	3.0407	3.04591	0.301492	0.693586	0.954856
NM_011392	chr13	55399648	55414695	+	3066	1	Slc34a1|NaPi-IIa|Npt2|Npt2a|Slc17a2|-|13 B1|13 29.81 cM|protein-coding	-0.150358	-0.148266	-0.148475	-0.14904	-0.147569	0.724526	0.752028	1
NM_178708	chr8	13077525	13105343	-	2392	1	Pcid2|A730042J05Rik|-|8|8 A1.1|protein-coding	9.92435	9.89041	9.89601	9.90756	9.89909	-0.0107094	0.884113	0.984626
NM_009818	chr18	35118912	35254775	+	3656	1	Ctnna1|2010010M04Rik|AA517462|AI988031|Catna1|-|18 B1|18 18.89 cM|protein-coding	14.087	14.0801	14.0211	14.0261	14.0442	-0.0619352	0.0411356	0.25809
NM_007911	chr11	69554092	69560237	-	3208	1	Efnb3|EFL-6|ELF-3|Elk-L3|Epl8|LERK-8|NLERK-2|-|11 B3|11 42.8 cM|protein-coding	6.28734	6.25712	6.30115	6.2735	6.24137	-0.000880504	0.997328	0.999134
NM_175414	chr6	127961400	128143578	-	3919	1	Tspan9|6720474K14Rik|9430079M16Rik|AU018597|-|6|6 F3|protein-coding	11.2018	11.1789	11.275	11.2428	11.2361	0.0867716	0.0928538	0.444741
NM_138948	chr11	4738821	4746778	-	692	1	Cabp7|-|-|11|11 A1|protein-coding	0.774113	0.77553	0.772895	0.773971	0.775306	-0.298184	0.849234	1
NM_010751	chr6	86647045	86669159	-	4653	1	Mxd1|AW122478|Mad|Mad1|-|6 D1|6 37.75 cM|protein-coding	6.48623	6.49694	6.52904	6.50311	6.48695	0.129229	0.578239	0.933233
NR_106191	chr8	84005628	84005764	+	136	1	Mir8111|Gm27823|mmu-mir-8111|-|8|8 C2|ncRNA	-1.86719	-1.86737	-1.86631	-1.86759	-1.86764	0.260813	0.95441	1
NM_198660	chr4	45890303	45950774	+	5041	1	Ccdc180|E230008N13Rik|Gm1025|-|4|4 B1|protein-coding	4.33335	4.3263	4.32182	4.30596	4.30405	-0.649188	0.169318	0.622798
NM_026609	chr8	34135572	34146739	-	2579	1	Leprotl1|1110067H13Rik|1520402O14Rik|AI854296|-|8|8 A4|protein-coding	10.6787	10.6819	10.6069	10.5812	10.6292	-0.115934	0.0535122	0.30896
NM_007890	chr16	94570206	94695519	+	6001	1	Dyrk1a|2310043O08Rik|D16Ertd272e|D16Ertd493e|Dyrk|ENSMUSG00000074897|Gm10783|Mnbh|Mp86|mmb|-|16 C4|16 55.3 cM|protein-coding	11.7372	11.7428	11.6909	11.729	11.6913	-0.0481538	0.291849	0.771445
NM_001290819	chr2	121158273	121171125	-	5922	1	Zscan29|AW125441|Zfp690|-|2|2 E5|protein-coding	9.80883	9.81672	9.8406	9.8143	9.80181	0.0105354	0.889572	0.985789
NM_146491	chr1	92607839	92608807	+	967	1	Olfr1410|MOR208-2|-|1|1 D|protein-coding	0	0	0	0	0	NA	1	1
NM_198322	chr13	67813816	67827000	+	2315	1	Zfp273|6820416H06Rik|Rslcan1|-|13|13 B3|protein-coding	1.38072	1.37956	1.38579	1.38549	1.38139	1.31937	0.371252	1
NR_030539	chrX	66801944	66802021	-	77	1	Mir881|Mirn881|mir-881|mmu-mir-881|-|X A7.1|X|ncRNA	0	0	0	0	0	NA	1	1
NM_011130	chr8	22628119	22653437	-	1211	1	Polb|A430088C08Rik|-|8 A2|8 11.42 cM|protein-coding	9.83581	9.87865	9.79331	9.85199	9.84173	-0.0531572	0.494139	0.893933
NR_040445	chr3	40504865	40522912	-	2433	1	1700017G19Rik|-|-|3|3 B|ncRNA	2.31781	2.30867	2.30319	2.30691	2.31112	-0.799073	0.399532	0.846179
NM_013555	chr2	74697763	74700208	+	2096	1	Hoxd9|Hox-4.4|Hox-5.2|-|2 C3|2 44.13 cM|protein-coding	0	0	0	0	0	NA	1	1
NM_139228	chr11	80300912	80355986	+	3756	1	Rhbdl3|AI847581|Rhbdl4|Rhomr1|Vrho|-|11|11 B5|protein-coding	1.34512	1.34166	1.35018	1.34989	1.34748	2.392	0.174927	1
NR_110478	chr5	45926822	45932409	-	578	1	4930405L22Rik|-|-|5|5 B3|ncRNA	0	0	0	0	0	NA	1	1
NM_009949	chr4	107903982	107923589	-	2343	1	Cpt2|AI323697|CPTII|-|4 C7|4 50.18 cM|protein-coding	9.35859	9.33795	9.3453	9.32465	9.35156	-0.0161555	0.853398	0.979744
NM_031198	chr6	16833381	16898441	-	1770	1	Tfec|BB107417|Tcfec|bHLHe34|-|6|6 A2|protein-coding	-1.86719	-1.86734	-1.86738	-1.86663	-1.86755	0.260813	0.95441	1
NR_045288	chr12	99626053	99627974	-	643	1	1700064M15Rik|-|-|12|12 E|ncRNA	0	0	0	0	0	NA	1	1
NM_028011	chr11	90645691	90687601	-	2075	1	Tom1l1|2310045L10Rik|C80573|Srcasm|-|11 D|11 55.47 cM|protein-coding	6.20326	6.16357	6.22388	6.18244	6.21227	0.24756	0.356559	0.817728
NM_030174	chr13	76384961	77031810	+	4266	1	Mctp1|2810465F10Rik|-|13|13 C1|protein-coding	2.23885	2.24372	2.24926	2.24151	2.23537	0.108186	0.916022	0.989006
NM_146079	chr17	47385393	47392967	+	1662	1	Guca1b|BC018258|GCAP2|-|17|17 C|protein-coding	4.04561	4.04857	4.05401	4.05086	4.05049	0.203626	0.698307	0.955694
NM_001102611	chr11	75348433	75405705	+	3504	1	Smyd4|G430029E23Rik|-|11|11 B5|protein-coding	9.22481	9.25905	9.25495	9.23467	9.21999	-0.0146921	0.872011	0.984184
NR_045799	chr16	5975587	5998496	+	671	1	1700123O21Rik|-|-|16 A1|16 2.71 cM|ncRNA	0	0	0	0	0	NA	1	1
NM_008155	chr7	34201327	34230336	-	2867	1	Gpi1|Amf|Gpi|Gpi-1|Gpi-1r|Gpi-1s|Gpi-1t|Gpi1-r|Gpi1-s|Gpi1-t|Gpi1s|MF|NK|NK/GPI|Nlk|Org|Pgi|Phi|-|7 B1|7 19.46 cM|protein-coding	13.3602	13.3261	13.4179	13.3969	13.4252	0.0844314	0.0137429	0.113543
NM_007843	chr8	21776555	21795185	+	912	1	Defb1|AW260221|BD-1|-|8 A2|8 10.35 cM|protein-coding	0	0	0	0	0	NA	1	1
NM_001038015	chr5	69575002	69592285	-	1829	1	Gnpda2|4921523I18Rik|4933412A11Rik|BB189630|GNPDA|Gnp2|Sb52|mKIAA4008|-|5|5 C3.1|protein-coding	8.30834	8.30357	8.34433	8.27465	8.34467	0.0516302	0.688619	0.952494
NM_145440	chr11	121160271	121161973	+	1700	1	Uts2r|Gpr14|UR-2-R|UTR|UTR2|-|11|11 E2|protein-coding	0	0	0	0	0	NA	1	1
NM_001329935	chr19	56287912	56320820	+	2919	1	Habp2|AI035669|FSAP|HABP|HGFAL|PHBP|-|19|19 D2|protein-coding	-0.854859	-0.855215	-0.853191	-0.853672	-0.85382	1.75137	0.537262	1
NM_001033338	chr16	17208135	17213982	+	5845	1	Rimbp3|Gm1759|Gm603|RIM-BP3|mKIAA1666|-|16|16 A3|protein-coding	-1.30824	-1.30852	-1.30692	-1.30881	-1.30733	1.20694	0.733148	1
NM_027344	chr13	60798250	60802844	-	1322	1	Ctsll3|2310051M13Rik|-|13|13 B2|protein-coding	0	0	0	0	0	NA	1	1
NR_033481	chrX	68667514	68678399	-	2739	1	Fmr1os|Asfmr1|ENSMUSG00000073146|Gm10474|-|X A7.1|X|ncRNA	2.97204	2.97507	2.98005	2.97276	2.97451	0.196531	0.797362	0.973682
NM_134174	chr6	56985342	56986289	+	946	1	Vmn1r5|V1rc19|-|6|6 B3|protein-coding	0	0	0	0	0	NA	1	1
NM_026470	chr4	111720010	111829140	+	2423	1	Spata6|1700062C23Rik|AI790763|Hash|KRP|Mash|-|4|4 D1|protein-coding	9.48152	9.5257	9.50217	9.46042	9.44192	-0.0769231	0.37392	0.829978
NM_001177583	chr17	40598594	40602617	+	547	1	Esp4|Gm20580|-|17 B2|17 19.54 cM|protein-coding	0	0	0	0	0	NA	1	1
NM_025875	chr3	96629928	96633791	+	2605	1	Rbm8a|2310057C03Rik|AA673428|Rbm8|-|3|3 F2.1|protein-coding	11.286	11.1487	11.2771	11.2457	11.3307	0.095659	0.139417	0.563981
NM_019571	chr3	138742208	138904433	+	3158	1	Tspan5|2810455A09Rik|4930505M03Rik|NET-4|Tm4sf9|-|3|3 H1|protein-coding	10.6766	10.6785	10.7181	10.749	10.7693	0.10616	0.0733731	0.381374
NM_001033164	chr16	18836580	18840113	+	1227	1	2510002D24Rik|2410043I01Rik|AA163535|AA409624|DXMgi27|-|16|16 A3|protein-coding	8.17426	8.22709	8.22407	8.2302	8.17707	0.030618	0.817901	0.974279
NM_053273	chr11	114675468	114720984	+	3440	1	Ttyh2|1110001A03Rik|-|11|11 E2|protein-coding	10.5645	10.5358	10.4699	10.4298	10.4667	-0.151066	0.0157861	0.125988
NR_126087	chr8	59825649	59844721	+	656	1	4930470O06Rik|-|-|8|8 B3.1|ncRNA	0	0	0	0	0	NA	1	1
NM_010775	chr14	41151456	41158959	+	916	1	Mbl1|MBL-A|MBP-A|S-MBP|-|14 B|14 22.36 cM|protein-coding	0	0	0	0	0	NA	1	1
NM_001198911	chr3	88616207	88648052	+	4397	1	Arhgef2|AA408978|GEF|GEF-H1|GEFH1|LFP40|Lbcl1|Lfc|P40|mKIAA0651|-|3|3 F1|protein-coding	12.4698	12.3988	12.1252	12.1883	12.1484	-0.353742	1.26002e-14	5.28713e-13
NM_146437	chr2	85579215	85580282	+	1065	1	Olfr996|MOR175-4|-|2|2 D|protein-coding	0	0	0	0	0	NA	1	1
NM_172442	chr19	12466336	12501996	-	5759	1	Dtx4|AI449438|BC044798|D930042H13|RNF155|-|19|19 A|protein-coding	10.7165	10.7173	10.6121	10.6711	10.6136	-0.130404	0.0326013	0.22021
NM_028291	chr5	147430580	147548501	+	4607	1	Pan3|2700050F09Rik|A430027N15Rik|AU014670|-|5|5 G3|protein-coding	11.6776	11.7193	11.6469	11.6754	11.6487	-0.0566633	0.222828	0.694092
NM_175465	chr2	77180340	77280592	-	8915	1	Sestd1|1500031J16Rik|A930010O20|Solo/Trio8|-|2|2 C3|protein-coding	11.8026	11.7934	11.8591	11.9526	11.8651	0.125944	0.0137253	0.113533
NM_178703	chr6	114282635	114317525	+	4277	1	Slc6a1|A730043E01|GABATHG|GABATR|GAT-1|Gabt|Gabt1|Gat1|XT-1|Xtrp1|-|6|6 E3|protein-coding	1.95687	1.94846	1.94771	1.94382	1.95027	-0.896135	0.400471	1
NM_178747	chr14	65986787	66009210	-	2251	1	Gulo|5730581M22|AU018375|BC028822|GLO|LGO|sfx|unh|unhip|-|14|14 D1|protein-coding	0	0	0	0	0	NA	1	1
NM_144546	chr17	55864892	55878953	-	2035	1	Zfp119a|AL024077|Mzf13|Zfp119|-|17|17 D|protein-coding	7.71224	7.74712	7.70571	7.74973	7.72039	-0.020167	0.894465	0.986768
NM_008031	chrX	68678541	68717961	+	4388	1	Fmr1|FMRP|Fmr-1|-|X A7.1|X 34.83 cM|protein-coding	12.7715	12.7676	12.721	12.7377	12.7243	-0.0513302	0.153178	0.589511
NM_172841	chr1	12866550	12991135	-	8500	1	Slco5a1|4732454B15|A630033C23Rik|AA407151|-|1|1 A3|protein-coding	0	0	0	0	0	NA	1	1
NM_011729	chr1	44147744	44181260	+	3993	1	Ercc5|Xpg|-|1 C1.1|1 23.55 cM|protein-coding	11.3215	11.3254	11.3409	11.3729	11.394	0.0651014	0.197708	0.664361
NM_008814	chr5	147270131	147275149	+	1283	1	Pdx1|IDX-1|IPF-1|Ipf1|Mody4|STF-1|pdx-1|-|5 G3|5 86.84 cM|protein-coding	-1.86561	-1.86744	-1.86751	-1.86774	-1.86781	-2.30448	0.573731	1
NM_001146081	chrX	164980592	164997272	+	2945	1	Fancb|BC022692|-|X|X F5|protein-coding	9.86875	9.86571	9.83198	9.74712	9.75024	-0.171746	0.0328154	0.221116
NM_001080708	chr2	167980786	168010593	-	2911	1	Fam65c|2310033K02Rik|Gm124|-|2|2 H3|protein-coding	6.70557	6.74063	6.70785	6.70813	6.72738	-0.0684341	0.746717	0.966179
NM_007719	chr11	99144199	99155077	-	1970	1	Ccr7|CC-CKR-7|CCR-7|CD197|Cdw197|Cmkbr7|EBI1|Ebi1h|-|11|11 D|protein-coding	0	0	0	0	0	NA	1	1
NM_008924	chr9	108692143	108749511	+	4027	1	Prkar2a|1110061A24Rik|AI317181|AI836829|RII(alpha)|-|9|9 F2|protein-coding	12.0831	11.9791	12.0525	12.0596	12.0964	0.0506546	0.307939	0.783915
NM_013561	chr9	48899213	48911099	-	2072	1	Htr3a|5-HT3|-|9|9 A5.3|protein-coding	0	0	0	0	0	NA	1	1
NM_001164306	chr1	166483613	166497588	-	1734	1	Gm4846|EG226601|Fmo13|-|1|1 H2.3|protein-coding	0	0	0	0	0	NA	1	1
NM_001289848	chr7	4751792	4753094	-	578	1	Cox6b2|1700067P11Rik|BC048670|COXVIB2|-|7|7 A1|protein-coding	0.12838	0.130433	0.13238	0.127826	0.132722	1.08468	0.638548	1
NM_001114333	chr10	10686059	11082331	-	6978	1	Grm1|4930455H15Rik|ENSMUSG00000075319|Gm10828|Gprc1a|mGluR1|nmf373|rcw|wobl|-|10|10 A1|protein-coding	0.718161	0.714904	0.719168	0.719844	0.719376	1.653	0.391722	1
NM_145835	chr9	64117147	64138118	+	2155	1	Lctl|E130104I05Rik|KLPH|-|9|9 C|protein-coding	8.49864	8.43787	8.47613	8.4213	8.40318	-0.106692	0.392884	0.842016
NM_029681	chr5	134901593	134906733	-	928	1	Wbscr28|1700111I05Rik|-|5|5 G2|protein-coding	-1.86719	-1.86737	-1.86631	-1.86759	-1.86764	0.260813	0.95441	1
NM_001289630	chr2	144270904	144281227	+	3100	1	Mgme1|8430406I07Rik|AI426476|-|2|2 G1|protein-coding	8.84366	8.84103	8.80866	8.77769	8.80082	-0.12346	0.230429	0.705605
NM_001005230	chr2	85904069	85905052	-	982	1	Olfr1024|MOR197-1|-|2|2 D|protein-coding	0	0	0	0	0	NA	1	1
NM_008062	chrX	74409486	74429161	-	2601	1	G6pdx|G28A|G6pd|Gpdx|-|X A7.3|X 38.0 cM|protein-coding	11.5171	11.447	11.4738	11.511	11.4788	0.00953655	0.851638	0.979224
NM_024223	chr12	113140236	113145506	+	1430	1	Crip2|0610010I23Rik|AW743261|C77570|CRP2|CRP4|Crp|ESP1|Hlp|-|12 F1|12 61.57 cM|protein-coding	13.273	13.2611	13.3963	13.367	13.4242	0.154886	1.75259e-05	0.000313948
NM_172481	chr7	10687793	10730158	+	3263	1	Nlrp4b|AU022726|E330024M09|Nalp-gamma|Nalp4b|-|7|7 A1|protein-coding	0	0	0	0	0	NA	1	1
NM_016983	chr16	17980565	17981080	+	426	1	Vpreb2|CD179b|VpreB1|Vpreb-2|-|16 A3|16 11.14 cM|protein-coding	0	0	0	0	0	NA	1	1
NR_035488	chr7	135566162	135566282	+	120	1	Mir1962|mir-1962|mmu-mir-1962|-|7 F3|7 81.27 cM|ncRNA	0	0	0	0	0	NA	1	1
NM_145624	chr8	71882068	71892565	+	3969	1	Zfp709|BC021921|GIOT-4|HIT-40|-|8|8 B3.3|protein-coding	-1.26938	-1.26967	-1.26802	-1.26831	-1.26998	1.25621	0.719277	1
NM_178746	chr13	112660766	112738752	+	8896	1	Slc38a9|4833412L08Rik|6720411P22Rik|9130023D20Rik|9430067K09Rik|A730092C09|-|13|13 D2.2|protein-coding	8.53171	8.51261	8.48527	8.50928	8.47427	-0.0970593	0.398162	0.845562
NM_007433	chr1	87086691	87089928	-	2099	1	Alppl2|Akp5|C77216|D1Ertd816e|EAP|-|1 C5|1 44.05 cM|protein-coding	-1.86719	-1.86734	-1.86738	-1.86663	-1.86755	0.260813	0.95441	1
NM_031872	chr4	155859270	155863353	-	3504	1	Tas1r3|Sac|T1r3|-|4 E2|4 87.65 cM|protein-coding	7.39609	7.40412	7.35705	7.41893	7.37692	-0.0800495	0.642712	0.944033
NM_010870	chr13	100211740	100247336	-	5275	1	Naip5|Birc1e|Lgn1|Naip-rs3|-|13 D1|13 53.05 cM|protein-coding	8.27568	8.27656	8.24139	8.21463	8.27399	-0.108817	0.391848	0.840793
NM_026772	chr19	5917556	5924816	-	1487	1	Cdc42ep2|1110008C05Rik|Borg1|Cep2|D19Bwg1013e|-|19 A|19 4.34 cM|protein-coding	7.88624	7.91777	7.82758	7.82198	7.84464	-0.284788	0.0430153	0.266741
NR_002142	chr14	50807447	50807771	-	324	1	Rpph1|Gm24821|H1RNA|Rmrp5|Rpr|-|14|14 C1|ncRNA	15.9547	16.1128	16.0275	15.9598	15.99	-0.0498123	0.298714	0.775769
NM_001310602	chr7	104264448	104288106	-	2485	1	Trim5|EG667823|Gm8833|-|7|7 E3|protein-coding	1.56837	1.56946	1.57332	1.57117	1.57216	0.859839	0.508757	1
NR_131956	chr19	61114982	61140840	-	2852	1	Zfp950|5830428H23Rik|AU016073|BC055757|Gm34518|Zfp826|mszf84|-|19|19 D3|protein-coding	8.12467	8.16083	8.12123	8.11144	8.0416	-0.184729	0.185092	0.647317
NM_001105191	chr7	10158652	10176286	-	2552	1	Vmn2r52|EG384534|-|7 A1|7|protein-coding	0	0	0	0	0	NA	1	1
NM_207214	chr14	49012144	49066667	-	4639	1	Exoc5|AI447711|AI448003|Gm76|PRO1912|SEC10|Sec10l1|-|14|14 C1|protein-coding	12.1477	12.1987	12.2202	12.1795	12.1732	0.0209254	0.632812	0.943384
NM_207549	chr16	59098066	59098990	-	921	1	Olfr192|-|-|16|16 C1.3|protein-coding	0	0	0	0	0	NA	1	1
NM_177638	chr17	57062277	57065914	+	1150	1	Crb3|5730439B18|AU015179|AU041752|-|17|17 D|protein-coding	0	0	0	0	0	NA	1	1
NM_007936	chr1	77367185	77515088	-	6308	1	Epha4|2900005C20Rik|AI385584|Cek8|Hek8|Sek|Sek1|Tyro1|rb|-|1 C4|1 39.55 cM|protein-coding	0	0	0	0	0	NA	1	1
NM_008530	chr15	75268421	75272234	+	871	1	Ly6f|-|-|15|15 D3|protein-coding	3.05249	3.05356	3.05873	3.06106	3.06889	0.947113	0.235946	0.712727
NM_001163836	chr17	9666497	9669704	-	3205	1	Pabpc6|4932702K14Rik|AI428050|Pabpc3|-|17|17 A1|protein-coding	0	0	0	0	0	NA	1	1
NM_001177833	chr2	131491862	131525183	+	2252	1	Smox|B130066H01Rik|PAO|PAOh1|SMO|-|2|2 F1|protein-coding	10.8171	10.8392	10.8624	10.8284	10.8456	0.0249493	0.659012	0.947523
NR_029382	chr14	115044390	115046728	+	2338	1	Mir17hg|5033413D16Rik|Mirhg1|OTTMUSG00000033261|mir-17-92|-|14|14 E4|ncRNA	8.57719	8.582	8.54029	8.53363	8.58168	-0.0802556	0.481233	0.888009
NR_033609	chr15	44881394	44884743	+	3349	1	A930017M01Rik|Gm305|-|15|15 B3.2|pseudo	5.53054	5.51394	5.50106	5.51747	5.50934	-0.203132	0.518692	0.907698
NM_009541	chr4	141444673	141467937	+	3397	1	Zbtb17|AA589413|Lp-1|Miz1|Zfp100|mZ13|-|4|4 D3|protein-coding	10.1919	10.1347	10.1691	10.1411	10.1717	-0.00326693	0.962747	0.992755
NM_015741	chr11	99873389	99874000	+	610	1	Krtap9-1|-|-|11|11 D|protein-coding	0	0	0	0	0	NA	1	1
NM_001033437	chr12	40176386	40199315	-	1207	1	Lsmem1|Gm889|-|12|12 B1|protein-coding	2.70442	2.70595	2.7157	2.70867	2.70381	0.470605	0.587681	0.933641
NM_177024	chr5	86659522	86676298	-	2204	1	Tmprss11b|9930019B18Rik|Tmprss11bnl|-|5|5 E1|protein-coding	0	0	0	0	0	NA	1	1
NM_025636	chr8	125734203	125748235	+	1148	1	Ntpcr|2310079N02Rik|AI449709|-|8|8 E2|protein-coding	7.98984	8.02574	8.01604	8.00327	8.01972	0.0174455	0.897851	0.986972
NM_013625	chr11	74673949	74724384	-	5504	1	Pafah1b1|LIS-1|Lis1|MMS10-U|Mdsh|Ms10u|Pafaha|-|11 B5|11 45.76 cM|protein-coding	13.6128	13.6121	13.5547	13.5471	13.5496	-0.0736676	0.0185643	0.142653
NM_011884	chr4	33310311	33502614	+	4139	1	Rngtt|AU020997|HCE|MCE1|-|4|4 A5|protein-coding	10.8619	10.8882	10.7976	10.8528	10.8628	-0.0552483	0.34712	0.81078
NM_201409	chr7	104840312	104842504	-	1404	1	Usp17lb|DUB-1A|Dub1a|USP17-B|-|7|7 E3|protein-coding	3.30929	3.29828	3.28015	3.29133	3.28402	-1.21947	0.0709189	0.373745
NM_001347060	chr10	92775616	93081596	-	10010	1	Cfap54|4930485B16Rik|Gm872|-|10|10 C2|protein-coding	1.31218	1.31338	1.31074	1.31165	1.32112	0.522163	0.720051	1
NM_024254	chr2	112379211	112414237	+	2871	1	Katnbl1|2410042D21Rik|AA166487|AA473307|AI467442|-|2|2 E3|protein-coding	10.6877	10.7234	10.5663	10.516	10.5708	-0.242368	8.32754e-05	0.00133927
NM_008196	chr13	113171874	113180897	-	786	1	Gzmk|-|-|13|13 D2.2|protein-coding	0	0	0	0	0	NA	1	1
NM_177880	chr5	143181017	143205068	+	2148	1	Spdye4b|4933411G11Rik|-|5|5 G2|protein-coding	2.08723	2.08516	2.09112	2.09189	2.09077	0.948895	0.388552	1
NM_009099	chr7	104409026	104465193	-	3760	1	Trim30a|Rpt-1|Rpt1|Trim30|-|7 E3|7 55.69 cM|protein-coding	9.79	9.86945	9.83317	9.83496	9.79589	-0.0200517	0.801096	0.973682
NM_010575	chr11	102453297	102469883	-	3405	1	Itga2b|AI172977|CD41|CD41B|GpIIb|alphaIIb|-|11 D|11 66.29 cM|protein-coding	5.79997	5.80143	5.80746	5.80832	5.80283	0.0742421	0.794216	0.973682
NM_025983	chr2	174461075	174464101	-	409	1	Atp5e|2410043G19Rik|ATPE|AV000645|-|2|2 H4|protein-coding	10.7173	10.8423	10.8406	10.8275	10.846	0.0829694	0.202696	0.670895
NM_025700	chr5	64092950	64128158	+	2160	1	Pgm1|3230402E02Rik|Pgm-1|Pgm2|-|5 C3.1|5 32.8 cM|protein-coding	10.086	10.1452	10.0507	10.0675	10.0413	-0.112738	0.112575	0.499144
NR_033780	chr11	64079484	64083259	+	899	1	2810001G20Rik|AW045514|-|11|11 B3|ncRNA	7.60642	7.6393	7.6579	7.69452	7.67293	0.241577	0.124256	0.529732
NM_021535	chr4	40735649	40757885	-	3259	1	Smu1|2600001O03Rik|2610203K23Rik|AB044414|AI845086|AW556129|Bwd|-|4|4 A5|protein-coding	12.6126	12.6674	12.7078	12.6249	12.6582	0.0281452	0.524475	0.911517
NM_198608	chr17	45506841	45520843	+	3325	1	Aars2|Aarsl|AlaRS|Gm89|-|17|17 B3|protein-coding	10.1851	10.1238	10.1784	10.1936	10.1586	0.0403729	0.565514	0.929787
NM_023587	chr16	35022421	35109175	+	3594	1	Hacd2|6330408J20Rik|AI255777|AI481689|Hcad2|Ptplb|-|16|16 B3|protein-coding	9.92388	9.87481	10.0001	10.0058	10.0333	0.210936	0.00438778	0.0447405
NM_198102	chr6	49243921	49264052	-	1818	1	Tra2a|1500010G04Rik|AL022798|G430041M01Rik|mAWMS1|-|6|6 B2.3|protein-coding	12.0659	12.0571	12.0478	12.0228	12.0086	-0.0456589	0.281038	0.761999
NM_001024205	chr11	77686139	77717966	+	10393	1	Nufip2|1110001M19Rik|9530056D24Rik|AI256692|AI461731|PIG1|mKIAA1321|-|11|11 B5|protein-coding	13.0424	13.0778	13	13.0286	12.9999	-0.0619534	0.0865394	0.425991
NM_019578	chr4	134356373	134372547	-	4101	1	Extl1|D430033M16Rik|-|4 D3|4 66.63 cM|protein-coding	-1.26839	-1.27082	-1.27092	-1.26919	-1.2712	-1.30551	0.685916	1
NM_019741	chr4	150119344	150144168	+	3080	1	Slc2a5|AI526984|Glut5|Slc5a|-|4|4 E2|protein-coding	-1.86719	-1.86737	-1.86631	-1.86759	-1.86764	0.260813	0.95441	1
NM_001011803	chr2	111911990	111912928	-	937	1	Olfr1306|MOR245-15|-|2|2 E3|protein-coding	0	0	0	0	0	NA	1	1
NM_001347497	chr14	27622407	28478537	+	6234	1	Erc2|6430531D06|CAST|CAST1/ERC2|D14Ertd171e|ELKS2alpha|-|14 A3|14 16.51 cM|protein-coding	-0.691747	-0.694748	-0.692447	-0.692999	-0.694982	-0.301176	0.910497	1
NM_010892	chr1	191821473	191833049	+	3187	1	Nek2|AA617254|C77054|-|1 H6|1 96.94 cM|protein-coding	13.1548	13.1678	13.1133	13.0985	13.1265	-0.0587321	0.0874161	0.42939
NM_010866	chr7	46376474	46379092	+	1849	1	Myod1|AI503393|MYF3|MyoD|Myod-1|bHLHc1|-|7 B3|7 30.03 cM|protein-coding	0	0	0	0	0	NA	1	1
NR_029774	chr14	34894609	34894706	+	97	1	Mir346|Mirn346|mir-346|mmu-mir-346|-|14|14 B|ncRNA	0	0	0	0	0	NA	1	1
NM_172499	chr1	40772040	40790657	-	3144	1	Mfsd9|4931419K03Rik|-|1|1 B|protein-coding	8.62355	8.70662	8.50784	8.59183	8.56214	-0.318494	0.00892284	0.0796612
NM_025984	chr3	92646532	92648307	-	704	1	Lce1a1|2200008B06Rik|Sprrl3|-|3|3 F1|protein-coding	-1.86719	-1.86734	-1.86738	-1.86663	-1.86755	0.260813	0.95441	1
NM_001110152	chr2	170511230	170519070	+	881	1	Pfdn4|0610025M10Rik|1810063B06Rik|C-1|C1|Pfd4|-|2 H3|2 91.91 cM|protein-coding	10.5604	10.6014	10.6007	10.5825	10.5582	-0.00293241	0.962115	0.992707
NM_146489	chr3	106821607	106822557	-	949	1	Olfr266|MOR122-2|-|3|3 F2.3|protein-coding	-1.86719	-1.86737	-1.86631	-1.86759	-1.86764	0.260813	0.95441	1
NM_010933	chr1	86666293	86670573	-	1037	1	Nppc|CNP|lbab|-|1 C5|1 43.98 cM|protein-coding	0	0	0	0	0	NA	1	1
NR_037261	chr2	10476342	10476423	+	81.9	8	Mir467a-7|Mirn467a-7|mmu-mir-467a-7|-|2|2 A1|ncRNA	1.35466	1.34766	1.34957	1.35009	1.35127	-0.2149	0.870233	1
NM_145632	chr16	20717826	20722265	+	780	1	Polr2h|-|-|16|16 B1|protein-coding	10.5927	10.5895	10.6743	10.6361	10.6729	0.11	0.0680003	0.363552
NR_106183	chr10	128458680	128458768	+	88	1	Mir8105|Gm27346|mmu-mir-8105|-|10|10 D3|ncRNA	-0.717638	-0.715663	-0.715852	-0.716362	-0.718172	-0.154338	0.955693	1
NM_001283028	chr13	51100880	51152562	+	4517	1	Spin1|Spin|-|13 A5|13 26.04 cM|protein-coding	10.908	10.9577	10.9268	10.9351	10.913	-0.0137557	0.805276	0.973682
NM_177897	chr7	141061274	141072119	+	3084	1	B4galnt4|BC038881|Gm1095|beta4GalNAcT4|-|7|7 F5|protein-coding	3.18074	3.17575	3.20283	3.20302	3.20844	4.38617	0.003502	0.0369605
NM_001009550	chr4	62147832	62150841	-	747	1	Mup21|Gm11208|Mup|Mup26|OTTMUSG00000000231|bM64F17.1|bM64F17.4|-|4 B3|4|protein-coding	0	0	0	0	0	NA	1	1
NM_001198861	chr5	33247723	33275004	-	2470	1	Ctbp1|BARS|CtBP3/BARS|D4S115h|D5H4S115|D5H4S115E|-|5 B1|5 17.52 cM|protein-coding	12.6811	12.6915	12.7521	12.72	12.7669	0.0740404	0.0526852	0.305849
NR_045710	chr3	10088277	10092562	+	1658	1	Gm9833|ENSMUSG00000049230|-|3|3 A1|pseudo	7.06469	7.02796	7.01679	7.0044	7.00134	-0.243946	0.195109	0.661851
NM_146571	chr2	85785474	85786489	+	1013	1	Olfr1015|MOR213-3|-|2|2 D|protein-coding	0	0	0	0	0	NA	1	1
NM_011684	chr6	89931650	89940507	-	3245	1	Vmn1r45|V1RA9|V1r2|V1ra11|V1ra2|mV1R2|-|6|6 D1|protein-coding	-1.86719	-1.86734	-1.86738	-1.86663	-1.86755	0.260813	0.95441	1
NM_001290690	chr11	33629780	33843585	-	1995	1	Kcnip1|KCHIP1|Kchip1.2|-|11|11 A4|protein-coding	-1.30824	-1.30852	-1.30692	-1.30881	-1.30733	1.20694	0.733148	1
NR_105877	chr10	80609260	80609329	+	69	1	Mir6912|Gm27990|mmu-mir-6912|-|10|10 C1|ncRNA	1.60094	1.59916	1.60085	1.60086	1.60186	0.275069	0.821489	1
NR_046078	chr14	74975086	74987104	+	1453	1	Gm4278|-|-|14 D3|14|ncRNA	0	0	0	0	0	NA	1	1
NM_001110794	chr14	20455261	20480133	-	2835	1	Anxa7|AI265384|AI316497|Anx7|synexin|-|14 A3|14 11.53 cM|protein-coding	11.705	11.7169	11.7518	11.6906	11.7144	0.00994622	0.833111	0.976559
NM_001029984	chr1	170907273	170912941	-	1277	1	Fcrlb|FREB-2|FREB2|FcRL2|Fcrlm2|Fcry|mFCRL2|-|1|1 H3|protein-coding	5.1809	5.18838	5.24667	5.22003	5.21324	0.93157	0.0169563	0.133103
NR_038186	chr15	32240568	32244662	-	1481	1	Snhg18|0610007N19Rik|Snord123|-|15 B3.1|15 13.02 cM|ncRNA	6.87024	6.82814	6.83353	6.81592	6.83997	-0.13561	0.507012	0.899846
NM_175231	chr5	33843112	33897966	+	6893	1	Whsc1|5830445G22Rik|9430010A17Rik|AW555663|C130020C13Rik|D030027O06Rik|D930023B08Rik|MMSET|NSD2|Whsc1l|mKIAA1090|-|5|5 B2|protein-coding	12.8157	12.8056	12.8653	12.8889	12.8469	0.0693601	0.0607367	0.337399
NM_030700	chrX	150806421	150814339	-	2111	1	Maged2|4833439A22Rik|Mage-d2|ORF1|-|X|X F3|protein-coding	9.68945	9.70711	9.80646	9.79522	9.84972	0.230846	0.00359319	0.0376932
NM_146793	chr2	90265511	90266428	-	916	1	Olfr1271|MOR227-5|-|2|2 E1|protein-coding	0	0	0	0	0	NA	1	1
NR_029720	chr19	6264844	6264932	+	88	1	Mir192|Mirn192|mir-192|mmu-mir-192|-|19|19 A|ncRNA	-1.86719	-1.86617	-1.86745	-1.86762	-1.86768	-2.07879	0.647706	1
NM_027547	chr6	65778962	65936377	+	2165	1	Prdm5|4432417F03Rik|6530401I24Rik|AI197291|E130112L17Rik|PFM2|-|6|6 C1|protein-coding	0	0	0	0	0	NA	1	1
NM_145353	chr17	46248080	46252537	+	2024	1	Yipf3|C6orf109|D17Wsu94e|KLIP1|-|17 C|17 22.9 cM|protein-coding	9.38958	9.28028	9.2893	9.37523	9.38684	0.0368482	0.720664	0.961907
NM_173426	chr4	5644179	5799944	+	1990	1	Fam110b|1700012H17Rik|5031405P22|AW049855|-|4|4 A1|protein-coding	8.49341	8.54343	8.26435	8.22772	8.2927	-0.790062	1.06591e-10	3.46472e-09
NM_021285	chr1	66924296	66945056	-	985	1	Myl1|AI325107|MLC1f|MLC3f|Mylf|-|1 C3|1 33.71 cM|protein-coding	0	0	0	0	0	NA	1	1
NR_108021	chr17	55954771	55959401	-	1977	1	Gm16712|-|-|17 D|17 29.08 cM|ncRNA	5.72207	5.70875	5.7111	5.70371	5.68675	-0.208978	0.480134	0.887165
NM_144731	chr8	57523825	57653055	-	4326	1	Galnt7|AI225872|-|8|8 B2|protein-coding	10.7443	10.7753	10.6737	10.6506	10.6904	-0.136558	0.0202341	0.152604
NM_027083	chr11	103631075	103638874	-	875	1	Lyzl6|1700023H08Rik|Lyc1|Lyzb|-|11|11 E1|protein-coding	0	0	0	0	0	NA	1	1
NM_146308	chr10	78846951	78847913	-	961	1	Olfr1356|MOR142-1|MOR142-2_p|-|10|10 C1|protein-coding	0	0	0	0	0	NA	1	1
NM_007688	chr12	54858819	54862877	-	2932	1	Cfl2|-|-|12|12 C1|protein-coding	12.5022	12.589	12.5295	12.4804	12.4848	-0.0615541	0.170605	0.624056
NM_001033303	chr3	103074014	103099720	+	2324	1	Ampd1|AI553520|Ampd-1|-|3 F2.2|3 45.25 cM|protein-coding	1.9591	1.96418	1.96095	1.95857	1.95952	-0.345175	0.742484	1
NM_026474	chr14	79587691	79629755	+	1936	1	Sugt1|2410174K12Rik|SGT1|-|14|14 D3|protein-coding	10.5508	10.5897	10.5881	10.5898	10.5797	0.0229929	0.704217	0.95823
NM_207537	chr7	48642863	48643801	-	937	1	Mrgprb3|MrgB3|-|7|7 B4|protein-coding	0	0	0	0	0	NA	1	1
NM_198246	chr16	16302965	16309640	+	1580	1	Yars2|2210023C10Rik|tyrRS|-|16|16 A2|protein-coding	10.3356	10.418	10.359	10.3768	10.3352	-0.036372	0.594327	0.936997
NR_034043	chr13	95330611	95330736	+	125	1	Snora47|MBI-115|-|13 D1|13|snoRNA	3.51798	3.50537	3.50336	3.51594	3.50801	-0.150975	0.813428	0.973806
NM_019411	chr11	52098824	52122749	+	1921	1	Ppp2ca|PP2A|R75353|-|11|11 B1.3|protein-coding	13.3276	13.338	13.3446	13.3199	13.3748	0.0165224	0.643822	0.944386
NR_106139	chr2	94241378	94241442	+	64	1	Mir129b|mmu-mir-129b|-|2|2 E1|ncRNA	0	0	0	0	0	NA	1	1
NM_001110320	chr4	43447724	43454626	-	1492	1	Cd72|CD72c|Ly-19|Ly-32|Ly-m19|Lyb-2|-|4 A5|4 23.04 cM|protein-coding	7.65566	7.60117	7.61154	7.65383	7.6336	0.0238192	0.881512	0.984584
NM_009698	chr8	122574637	122576907	-	859	1	Aprt|C85684|-|8 E1|8 71.91 cM|protein-coding	11.8706	11.9207	11.9098	11.8954	11.9432	0.0259113	0.573175	0.93214
NM_026319	chr4	94614491	94693233	+	2121	1	Ift74|1700029H06Rik|Ccdc2|Cmg1|b2b796Clo|-|4|4 C5|protein-coding	10.5286	10.5806	10.5709	10.519	10.5225	-0.0299976	0.638279	0.943384
NM_001164525	chr1	171419033	171420352	+	545	1	Tstd1|AV065366|EG226654|Gm4848|KAT|-|1|1 H3|protein-coding	5.13324	5.12531	5.13804	5.1401	5.1339	0.17198	0.634162	0.943384
NM_011797	chr3	95897800	95904639	-	1612	1	Car14|AW536446|Ca14|-|3|3 F2.1|protein-coding	6.8836	6.88625	6.89581	6.88462	6.8825	0.0181345	0.926393	0.990382
NM_010433	chr6	38697840	38876190	-	4242	1	Hipk2|1110014O20Rik|B230339E18Rik|Stank|-|6|6 B1|protein-coding	8.91819	8.85699	9.01958	9.0291	8.96289	0.299436	0.00499241	0.0494624
NM_021530	chr15	100761747	100823971	+	11766	1	Slc4a8|AW493845|C230026C11|NDCBE|kNBC-3|-|15|15 F1|protein-coding	7.37639	7.4298	7.39847	7.44308	7.44174	0.126854	0.469422	0.880771
NR_045369	chr5	124229725	124237137	+	1612	1	Pitpnm2os1|4930568K20Rik|-|5|5 F|ncRNA	3.43977	3.43819	3.44485	3.43758	3.43698	0.052107	0.935614	0.990382
NM_001166634	chr10	100345970	100352002	+	923	2	Gm4302|-|-|10 D1|10|protein-coding	0	0	0	0	0	NA	1	1
NM_153571	chr5	110829070	110839777	-	796	1	Hscb|AI325508|AW049829|Hsc20|-|5|5 F|protein-coding	7.89024	7.90065	7.87817	7.89262	7.90033	-0.020116	0.885677	0.984626
NM_028335	chr6	118427319	118455506	-	3653	1	Zfp248|2810037F07Rik|E130106N01Rik|-|6|6 F1|protein-coding	8.41289	8.40382	8.3968	8.39898	8.41933	-0.00929068	0.93726	0.990382
NM_001310453	chr14	33377899	33447158	-	5736	1	Mapk8|AI849689|JNK|JNK1|Prkm8|SAPK1|-|14|14 B|protein-coding	10.4742	10.4758	10.4029	10.4154	10.3955	-0.114471	0.0654648	0.355487
NM_001177510	chr5	11918043	11922804	+	1101	1	4933402N22Rik|-|-|5 A1|5|protein-coding	0	0	0	0	0	NA	1	1
NM_018874	chr19	58728887	58744169	+	1604	1	Pnliprp1|Plrp1|-|19 D2|19 54.49 cM|protein-coding	0	0	0	0	0	NA	1	1
NM_029881	chr10	25991186	26079052	-	4111	1	Tmem200a|C030003D03Rik|-|10|10 A4|protein-coding	-1.86719	-1.86733	-1.86737	-1.86748	-1.86672	0.260813	0.95441	1
NM_207302	chr7	132949622	132983951	+	2117	1	Zranb1|9330160G10Rik|D7Wsu87e|Gm1956|Trabid|-|7 F3|7 76.32 cM|protein-coding	10.3978	10.4005	10.3429	10.3397	10.361	-0.0842411	0.184589	0.647213
NM_146423	chr9	38084838	38085767	+	928	1	Olfr887|C77344|MOR162-5|-|9|9 A4|protein-coding	0	0	0	0	0	NA	1	1
NM_009313	chr6	82402475	82560104	+	5018	1	Tacr1|Nk1r|Spr|Tac1r|-|6|6 C3|protein-coding	2.55846	2.5544	2.55323	2.55552	2.55245	-0.306608	0.719689	0.961907
NM_023530	chr10	59403685	59421976	+	1060	1	Pla2g12b|2010002E04Rik|Fksg71|Pla2g13|hlb218|-|10|10 B4|protein-coding	-1.86719	-1.86734	-1.86738	-1.86663	-1.86755	0.260813	0.95441	1
NM_001014900	chr4	119422684	119453899	+	1495	1	Zmynd12|AI414736|-|4|4 D2.1|protein-coding	0.947058	0.943154	0.942862	0.945738	0.945241	-0.160456	0.915023	1
NM_007856	chr7	143823167	143848410	+	2805	1	Dhcr7|AA409147|-|7|7 F5|protein-coding	9.69436	9.6207	9.582	9.62196	9.63648	-0.0848988	0.315882	0.789291
NM_025778	chr6	134396329	134438724	+	2211	1	Bcl2l14|4930452K23Rik|4933405K19Rik|9030625M01Rik|AI429211|Bclg|-|6|6 G1|protein-coding	0.0678305	0.0670347	0.0690853	0.0642961	0.0659784	-0.618191	0.763221	1
NR_035410	chr2	10475300	10475426	+	126	1	Mir669k|Mirn669k|mir-669k|mmu-mir-669k|-|2 A1|2 8.22 cM|ncRNA	1.37499	1.36797	1.37214	1.36854	1.37157	-0.185143	0.888118	1
NM_001145351	chr2	156000443	156004427	-	1865	1	6430550D23Rik|-|-|2|2 H1|protein-coding	4.61152	4.60167	4.61225	4.61328	4.59781	0.036088	0.934178	0.990382
NM_009375	chr15	66670770	66850720	+	8386	1	Tg|Tgn|cog|-|15 D2|15 29.3 cM|protein-coding	6.22012	6.19111	6.21507	6.23884	6.21239	0.177422	0.489311	0.892122
NM_001037938	chr14	55478758	55490340	+	1382	1	Dhrs4|AI043103|AI790593|CR|D14Ucla2|NDRD|PHCR|PSCD|RRD|mouNRDR|-|14 C3|14 28.19 cM|protein-coding	8.72579	8.63811	8.6722	8.69341	8.74032	0.0588801	0.618571	0.941609
NM_023894	chrX	37899097	37901770	-	876	1	Rhox9|1600026O01Rik|Gpbox|Psx2|-|X|X A3.3|protein-coding	0	0	0	0	0	NA	1	1
NR_045482	chr6	87675593	87690847	-	1042	1	1810020O05Rik|-|-|6 D1|6|ncRNA	-0.50985	-0.510105	-0.508027	-0.506813	-0.508706	2.14763	0.409021	1
NM_153109	chrX	118427235	118428256	+	1019	2	Tgif2lx1|OTTMUSG00000018465|Tex1|Tgif2lx|Tgifx1|-|X|X E1|protein-coding	0	0	0	0	0	NA	1	1
NM_172712	chr5	86110730	86172743	-	5052	1	Uba6|4930542H01|5730469D23Rik|AU021846|AW124799|E1-L2|Ube1l2|-|5|5 E1|protein-coding	11.0565	11.1073	11.0656	11.0479	10.9799	-0.0757288	0.200427	0.668266
NM_001083921	chr2	152316334	152332425	-	2383	1	Rbck1|AL033326|HOIL-1|HOIL-1L|UIP28|Ubce7ip3|-|2|2 G3|protein-coding	11.1383	11.1343	11.2362	11.2036	11.1758	0.0981297	0.0662262	0.358099
NM_011046	chr7	80389194	80402812	-	4318	1	Furin|9130404I01Rik|Fur|PACE|Pcsk3|SPC1|-|7 D2|7 45.65 cM|protein-coding	11.556	11.3835	11.5901	11.6662	11.7842	0.284847	0.0278514	0.194201
NM_028597	chr13	54458837	54468840	-	2318	1	Thoc3|2410044K02Rik|AL033344|-|13|13 B1|protein-coding	11.1307	11.136	11.2022	11.1881	11.209	0.0949811	0.0635476	0.348492
NM_016872	chr6	72368049	72380468	-	1643	1	Vamp5|AF119384|Camp|-|6|6 C1|protein-coding	9.15661	9.09343	9.06637	9.05518	9.07252	-0.141981	0.141553	0.567482
NM_001101464	chr6	70956606	70961066	+	1202	1	Foxi3|-|-|6|6 C1|protein-coding	0	0	0	0	0	NA	1	1
NM_008973	chr6	36715663	36811361	-	2014	1	Ptn|HARP|HB-GAM|HBBN|HBGF-8|HBNF|OSF|Osf-1|Osf1|-|6 B1|6 15.48 cM|protein-coding	9.58871	9.66454	9.59362	9.58619	9.63128	-0.0488723	0.563827	0.929699
NM_023048	chr6	5383386	5433021	+	3277	1	Asb4|8430401O13Rik|AV117194|AW060255|-|6 A1|6 1.99 cM|protein-coding	5.13859	5.13272	5.18011	5.18302	5.19291	1.19114	0.00250381	0.0276919
NM_001177624	chr2	110597299	110649345	+	5075	1	Slc5a12|AI315119|D630015G19|SMCT2|-|2|2 E3|protein-coding	-1.86719	-1.86737	-1.86631	-1.86759	-1.86764	0.260813	0.95441	1
NR_038018	chr10	99638731	99641920	-	2503	1	Gm18409|-|-|10|10 D1|pseudo	-1.30824	-1.30852	-1.30692	-1.30881	-1.30733	1.20694	0.733148	1
NM_178337	chr13	13997951	14039638	-	1826	1	Tbce|2610206D02Rik|C530005D02Rik|pmn|-|13 A1|13 5.29 cM|protein-coding	10.59	10.5206	10.7128	10.7333	10.7287	0.268308	1.29511e-05	0.000238159
NM_008359	chr6	120463197	120483727	+	3955	1	Il17ra|AW538159|Cdw217|Il17r|VDw217|-|6 F1|6 56.95 cM|protein-coding	11.9381	11.9779	11.8561	11.8075	11.8417	-0.162417	0.000330606	0.00469529
NM_175316	chr7	99657804	99711340	-	4365	1	Slco2b1|AI060904|AI852653|OATP-B|Slc21a9|-|7|7 E1|protein-coding	-1.86719	-1.86617	-1.86745	-1.86762	-1.86768	-2.07879	0.647706	1
NM_019428	chr19	36083716	36104773	+	1143	1	Rpp30|Rnasep2|TSG15|-|19|19 C2|protein-coding	10.2542	10.2865	10.2406	10.2041	10.2518	-0.0657273	0.331872	0.803431
NM_001289713	chr6	53873279	53978673	-	1607	1	Cpvl|4933436L16Rik|HVLP|-|6|6 B3|protein-coding	0	0	0	0	0	NA	1	1
NR_073186	chr9	75314068	75345923	+	2407	1	Gnb5|GBS|Gbeta5|flr|-|9 D|9 42.3 cM|protein-coding	8.43741	8.42645	8.43586	8.43094	8.43351	0.00513437	0.964829	0.992755
NR_030719	chr7	106075731	106079148	-	3417	1	Gm8979|EG668108|Gm21884|-|7|7 E3|pseudo	0	0	0	0	0	NA	1	1
NM_007475	chr5	115559467	115563729	+	1351	1	Rplp0|36B4|Arbp|L10E|-|5|5 F|protein-coding	15.9757	16.0422	16.0842	16.0623	16.0805	0.0754686	0.0190238	0.145377
NM_028113	chr14	60378286	60381003	+	2715	1	Amer2|2600011E07Rik|Fam123a|-|14|14 D1|protein-coding	0	0	0	0	0	NA	1	1
NR_131194	chr13	110882411	110903846	-	1175	1	4930526H09Rik|-|-|13 D2.2|13|ncRNA	-0.0360941	-0.0363164	-0.03638	-0.0297612	-0.0334411	2.63147	0.30254	1
NM_145456	chr13	107724617	107890064	-	5440	1	Zswim6|2900036G02Rik|mKIAA1577|-|13|13 D2.1|protein-coding	8.86116	8.93954	8.75827	8.72605	8.67247	-0.478472	1.84953e-05	0.000329183
NM_024438	chr2	80617214	80631661	+	1457	1	Dusp19|5930436K22Rik|C79103|SKRP1|TS-DSP1|-|2|2 C3|protein-coding	7.91254	7.89367	7.86483	7.87345	7.88237	-0.116971	0.402377	0.848035
NM_001044380	chr12	108306270	108328300	+	2594	1	Hhipl1|1600002O04Rik|AK129450|mKIAA1822|-|12|12 F1|protein-coding	5.62488	5.62786	5.72728	5.71501	5.72341	1.78611	6.51335e-07	1.44305e-05
NR_024513	chr5	150499747	150502219	-	467	1	Gm5|Gm1812|-|5|5 G3|ncRNA	-1.86719	-1.86733	-1.86737	-1.86748	-1.86672	0.260813	0.95441	1
NR_105765	chr1	167290125	167290225	+	100	1	Mir6347|Gm27863|mmu-mir-6347|-|1|1 H2.3|ncRNA	0	0	0	0	0	NA	1	1
NM_031868	chr19	4192174	4195419	+	1354	1	Ppp1ca|Ppp1c|dism2|-|19|19 A|protein-coding	13.5204	13.5743	13.5884	13.5602	13.5784	0.0325644	0.353642	0.815603
NR_128567	chr8	12947941	12948070	+	129	1	Gm38671|Mir9768|mmu-mir-9768|-|8|8 A1.1|ncRNA	0	0	0	0	0	NA	1	1
NR_040475	chr1	41167560	41181252	-	570	1	4930448I06Rik|-|-|1|1 B|ncRNA	0	0	0	0	0	NA	1	1
NM_001111293	chrX	73148841	73158399	+	1123	1	Xlr5b|OTTMUSG00000017646|-|X A7.3|X|protein-coding	0	0	0	0	0	NA	1	1
NM_029626	chr14	31001433	31012441	+	2473	1	Glt8d1|2410004H05Rik|5430414N14Rik|AI450005|-|14|14 B|protein-coding	9.95219	9.97102	9.96983	9.95038	9.93708	-0.018181	0.801907	0.973682
NM_009948	chr15	89416405	89425862	-	2873	1	Cpt1b|Cpt1|Cpt1-m|Cpti|Cpti-m|M-cpti|-|15 E3|15 44.89 cM|protein-coding	8.30497	8.36445	8.38923	8.35111	8.38037	0.122574	0.32952	0.802098
NM_080726	chr14	54476100	54480434	+	1880	1	Rem2|AW411893|-|14|14 C2|protein-coding	2.86833	2.8529	2.854	2.85968	2.85797	-0.311959	0.696444	0.955553
NR_105849	chr4	36668510	36668586	+	76	1	Mir873b|mmu-mir-873b|-|4|4 A5|ncRNA	0	0	0	0	0	NA	1	1
NR_046277	chr6	146657218	146665403	+	737	1	4930479D17Rik|-|-|6|6 G3|ncRNA	-0.854859	-0.855215	-0.853191	-0.853672	-0.85382	1.75137	0.537262	1
NM_008215	chr17	17843326	17855188	-	2085	1	Has1|HAS|-|17 A3.2|17 10.53 cM|protein-coding	4.63903	4.61134	4.60871	4.60778	4.59603	-0.584664	0.178408	0.63683
NM_009558	chr17	21450374	21465589	+	2569	1	Zfp51|Zfp-51|zfec12|-|17 A3.2|17 11.4 cM|protein-coding	9.44175	9.47154	9.51192	9.44708	9.45346	0.027804	0.751486	0.966878
NM_013776	chr12	105176358	105181145	+	1035	1	Tcl1b5|D12Ertd644e|-|12 E|12 55.23 cM|protein-coding	0	0	0	0	0	NA	1	1
NM_027050	chr11	32820376	32824594	-	600	1	Smim23|1700008A04Rik|-|11|11 A4|protein-coding	0	0	0	0	0	NA	1	1
NM_009791	chr1	139454773	139494088	+	9836	1	Aspm|Calmbp1|D330028K02Rik|MCPH5|Sha1|-|1|1 E4-F|protein-coding	13.7069	13.7001	13.5503	13.62	13.5241	-0.163519	5.12408e-05	0.000853828
NM_007978	chrX	73228306	73230795	+	2487	1	F8a|AI852759|DXUcsf1|F8a1|-|X A7.3|X 37.29 cM|protein-coding	7.98765	8.01245	7.97496	8.01368	8.00944	-0.00242058	0.985952	0.997143
NM_020268	chr7	44052290	44056711	+	881	1	Klk1b27|Gk27|Klk21l|Klk27|mGK-27|-|7 B3|7 28.54 cM|protein-coding	0	0	0	0	0	NA	1	1
NR_038036	chr10	9684722	9691909	+	2976	1	Gm6150|-|-|10 A1|10|ncRNA	0	0	0	0	0	NA	1	1
NM_146609	chr9	39736817	39737755	+	937	1	Olfr150|M93|MOR171-18|-|9|9 A5.1|protein-coding	0	0	0	0	0	NA	1	1
NR_045294	chr14	75842918	75844964	-	1360	1	Gm4285|-|-|14 D3|14|ncRNA	3.05541	3.06535	3.06329	3.05226	3.05929	-0.178508	0.810968	0.973682
NM_028146	chr8	123505687	123515455	-	1663	1	Dbndd1|2810427I04Rik|D8Ertd590e|-|8 E1|8 72.1 cM|protein-coding	5.30097	5.26932	5.30337	5.32079	5.28257	0.334247	0.370745	0.827788
NM_133941	chr7	133720935	133776803	-	2948	1	Dhx32|3110079L04Rik|4732469F02Rik|AA408140|Ddx32|-|7|7 F3|protein-coding	11.2168	11.2111	11.2792	11.2851	11.2867	0.0990218	0.0467573	0.283223
NM_001243167	chr4	88805531	88808380	+	2847	1	Gm13288|OTTMUSG00000011289|-|4 C4|4|protein-coding	3.2093	3.18364	3.19609	3.20587	3.20679	0.517863	0.533889	0.916501
NM_029062	chr1	31222839	31224287	+	1446	1	Pih1d3|4930521A18Rik|-|1|1 B|protein-coding	0	0	0	0	0	NA	1	1
NM_010361	chr10	75831845	75834881	-	1363	1	Gstt2|AI266894|Yrs|mGSTT2|-|10 C1|10 38.58 cM|protein-coding	0	0	0	0	0	NA	1	1
NM_001110849	chr2	101714285	101838980	-	4147	1	Prr5l|2600010E01Rik|4833411O04Rik|Protor-2|Protor2|-|2|2 E2|protein-coding	-0.150358	-0.148266	-0.148475	-0.14904	-0.147569	0.724526	0.752028	1
NM_010303	chr11	109362794	109401369	+	6191	1	Gna13|AU024132|AU043124|Galpha13|-|11 E1|11 71.88 cM|protein-coding	12.2415	12.2389	12.2913	12.2488	12.2555	0.0314577	0.4434	0.870025
NM_177324	chr7	110308013	110614920	-	7120	1	Sbf2|4833411B01Rik|AA414977|AI317167|B430219L04Rik|Mtmr13|mMTMH1|-|7|7 E3|protein-coding	12.1717	12.1422	12.2049	12.2604	12.1783	0.0747486	0.105301	0.479677
NM_001037925	chr13	120300392	120308841	+	1650	1	BC147527|-|-|13 D2.3|13|protein-coding	-1.30824	-1.30852	-1.30692	-1.30881	-1.30733	1.20694	0.733148	1
NM_011840	chr9	63163770	63377852	-	2234	1	Map2k5|AI324775|AI428457|MEK5|Mapkk5|Prkmk5|-|9|9 B-C|protein-coding	9.19646	9.17494	9.20274	9.1883	9.21809	0.0412808	0.653493	0.94644
NM_027591	chrX	102903222	102908687	-	1238	1	Dmrtc1a|1700030H14Rik|4921520P21Rik|DMRTC1|Dmrt8.1|-|X|X D|protein-coding	7.53432	7.55508	7.5429	7.57659	7.5728	0.0939167	0.556751	0.92638
NR_132433	chr8	112554617	112569575	-	1565	1	Gm26994|-|-|8 E1|8|ncRNA	0	0	0	0	0	NA	1	1
NM_029706	chr3	20249479	20275733	-	1490	1	Cpb1|0910001A18Rik|1810063F02Rik|2210008M23Rik|AI504870|-|3 A2|3 6.29 cM|protein-coding	-1.22967	-1.22801	-1.22811	-1.2303	-1.23033	-1.12444	0.733838	1
NR_045880	chr6	88842854	88847274	+	3115	1	Gm15612|ENSMUSG00000072920|OTTMUSG00000024319|-|6 D1|6|ncRNA	4.13321	4.1313	4.14766	4.13264	4.15209	0.511068	0.339338	0.807609
NM_145999	chr17	25838838	25844851	-	2787	1	Rhot2|Arht2|Miro2|-|17 A3.3|17 12.93 cM|protein-coding	10.5476	10.5934	10.6147	10.583	10.5648	0.0244011	0.69638	0.955553
NM_198224	chr19	11169418	11196723	-	1365	1	Ms4a13|1700060E18Rik|Tetm4.2|-|19|19 A|protein-coding	0	0	0	0	0	NA	1	1
NM_146938	chr2	36688004	36688933	+	928	1	Olfr346|MOR136-11|-|2|2 B|protein-coding	0	0	0	0	0	NA	1	1
NR_033197	chr15	74709161	74710374	+	1213	1	4933427E11Rik|-|-|15|15 D3|ncRNA	4.82446	4.85733	4.83417	4.85443	4.85249	0.152796	0.72303	0.962244
NM_011716	chr5	36966104	36988982	-	3554	1	Wfs1|AI481085|wolframin|-|5|5 B3|protein-coding	9.07768	9.15435	9.04494	9.04934	9.10724	-0.118445	0.244598	0.721704
NM_026716	chr7	28540885	28542210	+	553	1	Sycn|0910001K16Rik|1810038B08Rik|SYL|-|7|7 B1|protein-coding	0	0	0	0	0	NA	1	1
NM_010011	chr4	115518287	115533649	+	2071	1	Cyp4a10|AI647584|Cyp4a|D4Rp1|Msp-3|RP1|-|4 D1|4 53.05 cM|protein-coding	0	0	0	0	0	NA	1	1
NM_177278	chr17	68273797	68780086	+	4547	1	L3mbtl4|A730037L19Rik|D930040M24Rik|-|17|17 E1.2|protein-coding	-1.23233	-1.23494	-1.2328	-1.2353	-1.23533	-1.29951	0.677567	1
NM_001080712	chr4	134190804	134203004	-	2328	1	Gm7534|EG665186|-|4|4 D3|protein-coding	0	0	0	0	0	NA	1	1
NM_029153	chr13	94201433	94285281	-	3577	1	Scamp1|4930505M11Rik|AI415563|AW122395|-|13|13 C3|protein-coding	10.5163	10.545	10.5218	10.5152	10.527	-0.0159208	0.794175	0.973682
NM_020595	chr2	143078492	143081699	+	910	1	Otor|CDRAP|Fdp|MIA|MIAL|-|2|2 G1|protein-coding	0	0	0	0	0	NA	1	1
NR_037278	chr4	58441012	58441098	-	86	1	Mir3095|mir-3095|mmu-mir-3095|-|4 B3|4 32.2 cM|ncRNA	-0.717638	-0.715663	-0.715852	-0.716362	-0.718172	-0.154338	0.955693	1
NM_146149	chr4	106733915	106748292	+	1887	1	Fam151a|2010309H15Rik|-|4|4 C7|protein-coding	3.95983	3.95225	3.94925	3.95717	3.95022	-0.168796	0.752636	0.966878
NM_001104642	chr6	124191596	124231784	-	2567	1	Vmn2r27|EG232367|-|6|6 F2|protein-coding	0	0	0	0	0	NA	1	1
NM_144894	chr2	181364931	181380793	+	2280	1	Zgpat|1500006I01Rik|BC021513|-|2|2 H4|protein-coding	10.4724	10.4805	10.3737	10.4076	10.4084	-0.129162	0.0403599	0.254608
NR_040331	chr2	150667494	150668932	+	934	1	E130215H24Rik|-|-|2|2 G3|ncRNA	0	0	0	0	0	NA	1	1
NM_019818	chr11	76407143	76416313	+	2832	1	Timm22|Tim22|-|11|11 B5|protein-coding	10.4977	10.613	10.6011	10.6023	10.603	0.0689194	0.305637	0.780407
NM_011920	chr6	58596672	58692451	+	2473	1	Abcg2|ABC15|ABCP|AI428558|BCRP|Bcrp1|MXR|MXR1|-|6 B3|6 27.82 cM|protein-coding	10.3481	10.3268	10.3292	10.3305	10.3045	-0.0264021	0.684019	0.951583
NM_018729	chr1	171559193	171585316	+	3747	1	Cd244|2B4|C9.1|F730046O15Rik|Ly90|NAIL|NKR2B4|Nmrk|SLAMF4|-|1 H3|1 79.52 cM|protein-coding	0	0	0	0	0	NA	1	1
NR_024325	chr1	56971469	56975196	+	3727	1	9130024F11Rik|B530002L08|EG329160|-|1|1 C1.3|ncRNA	7.40927	7.4235	7.39878	7.38558	7.38762	-0.134075	0.412703	0.854742
NM_134166	chr6	66715972	66716889	-	916	1	Vmn1r36|V1rc11|-|6|6 C1|protein-coding	0	0	0	0	0	NA	1	1
NM_145592	chr8	22624043	22627546	+	1308	1	Dkk4|Dkk-4|-|8|8 A2|protein-coding	1.22762	1.22545	1.22252	1.21931	1.22079	-1.54566	0.245986	1
NM_001033980	chr8	120166397	120177469	-	1179	1	Fam92b|1700120B06Rik|-|8|8 E1|protein-coding	0	0	0	0	0	NA	1	1
NM_001290411	chr7	4425665	4445657	-	3068	1	Rdh13|8430425D21Rik|-|7|7 A1|protein-coding	10.1489	10.2111	10.2132	10.1922	10.2077	0.0388415	0.575145	0.93214
NM_019776	chr6	28480348	28888832	+	3456	1	Snd1|AL033314|Tudor-SN|-|6|6 A3.3|protein-coding	13.4886	13.4681	13.4797	13.4762	13.4612	-0.006943	0.831345	0.976155
NR_028555	chr1	39548747	39548840	-	93	1	Snord89|MBII-289|-|1 B|1|snoRNA	3.97451	3.9795	3.97606	3.97027	3.9721	-0.187834	0.722046	0.962211
NM_001270431	chr4	41941634	41942633	+	371	4	Gm20878|-|-|4 A5|4|protein-coding	0.111532	0.108414	0.108337	0.113507	0.111405	0.861393	0.70709	1
NM_029982	chr10	115569986	115582454	+	1000	1	A930009A15Rik|-|-|10|10 D2|protein-coding	0	0	0	0	0	NA	1	1
NM_001347334	chr17	25958364	25985874	-	5286	1	Capn15|Solh|-|17|17 A3.3|protein-coding	9.93588	9.87957	9.87392	9.92116	9.89106	-0.0205499	0.787458	0.972001
NM_198170	chr4	118362740	118409263	-	10884	1	Szt2|6430407N22|ENSMUSG00000058432|TIGR|-|4|4 D2.1|protein-coding	9.75054	9.66424	9.67379	9.74052	9.69317	-0.00714368	0.933227	0.990382
NM_001177581	chr1	162647243	162658219	-	735	1	7420461P10Rik|ENSMUSG00000073516|-|1 H2.1|1|protein-coding	-1.86719	-1.86734	-1.86738	-1.86663	-1.86755	0.260813	0.95441	1
NM_178086	chr8	111345138	111393821	-	2483	1	Fa2h|FAAH|Faxdc1|G630055L08Rik|-|8|8 E1|protein-coding	0	0	0	0	0	NA	1	1
NM_001285923	chr4	147873586	147904698	-	4452	1	Mfn2|D630023P19Rik|Fzo|-|4|4 E2|protein-coding	12.0259	11.9325	12.0249	11.9848	12.0538	0.055607	0.271953	0.7536
NM_001011798	chr9	38047224	38048153	+	928	1	Olfr884|MOR162-11P|MOR162-13|MOR162-9P|Olfr1550-ps1|-|9|9 A4|protein-coding	0	0	0	0	0	NA	1	1
NM_183249	chr11	83746940	83752646	+	433	1	Wfdc21|1100001G20Rik|Wdnm1-like|-|11|11 C|protein-coding	0.859501	0.858543	0.858267	0.861095	0.862277	0.646806	0.692919	1
NM_001252494	chr11	54522845	54699286	+	8176	1	Rapgef6|A530068K01|AI844632|BB085664|C030018K18Rik|PDZ-GEF2|Pdzgef2|RA-GEF-2|Ragef2|mKIAA4052|-|11|11 B1.3|protein-coding	11.6312	11.5886	11.6153	11.6617	11.6213	0.0322246	0.504946	0.899046
NM_183417	chr10	128697939	128705051	-	2422	1	Cdk2|A630093N05Rik|-|10|10 D3|protein-coding	11.0533	11.0991	11.057	11.0463	11.0495	-0.0386748	0.468538	0.8801
NM_153131	chr13	54949432	55006018	+	3956	1	Unc5a|Unc5h1|mKIAA1976|-|13|13 B1|protein-coding	0	0	0	0	0	NA	1	1
NM_001081453	chr12	70011435	70102854	-	9644	1	Nin|3110068G20Rik|AI385615|AU024711|mKIAA1565|-|12|12 C2|protein-coding	12.8696	12.856	12.9224	12.989	12.9467	0.110774	0.00460704	0.0465316
NM_001160209	chr1	164289800	164307484	-	4005	1	Blzf1|1700030G05Rik|Blzf1l|Golgin-45|Jem-1|-|1|1 H2.2|protein-coding	10.5799	10.5532	10.4835	10.4506	10.4587	-0.163222	0.00811471	0.0741323
NM_001166714	chr7	21133211	21134128	-	916	1	Vmn1r122|EG435951|Gm5729|-|7|7 A3|protein-coding	0	0	0	0	0	NA	1	1
NM_011201	chr2	167932327	167979385	+	4202	1	Ptpn1|PTP-1B|PTP-HA2|PTP1B|-|2|2 H3|protein-coding	11.9641	11.9231	12.0005	12.0218	12.0434	0.103476	0.0192605	0.146699
NM_011056	chr13	108654177	109955969	+	7030	1	Pde4d|9630011N22Rik|Dpde3|-|13 D2.1|13 59.69 cM|protein-coding	5.93122	5.92034	5.88209	5.91102	5.93719	-0.188559	0.521002	0.909655
NM_021528	chr5	140505609	140525238	+	1782	1	Chst12|AI595374|C4S-2|C4ST2|-|5|5 G2|protein-coding	9.00596	9.00493	9.02095	8.97681	8.96471	-0.0453913	0.648315	0.94546
NM_001302345	chr5	120940500	121008484	-	3881	1	Rph3a|2900002P20Rik|AU022689|AW108370|-|5|5 F|protein-coding	-0.938938	-0.939269	-0.939361	-0.93618	-0.937953	1.63331	0.610096	1
NM_009878	chr9	21288464	21291209	-	1266	1	Cdkn2d|INK4d|p19|p19INK4d|-|9|9 A3|protein-coding	9.49509	9.43259	9.27526	9.33939	9.345	-0.304184	0.00100458	0.0126459
NM_010901	chr8	106059603	106130537	+	6002	1	Nfatc3|C80703|D8Ertd281e|NFAT4|NFATx|-|8 D3|8 53.08 cM|protein-coding	11.2467	11.2355	11.273	11.3722	11.2442	0.0801258	0.192651	0.658515
NM_011488	chr11	100859351	100885169	+	3866	1	Stat5a|AA959963|STAT5|-|11 D|11 63.77 cM|protein-coding	9.3197	9.41886	9.36054	9.33773	9.33491	-0.0601245	0.518075	0.90727
NM_001039648	chr13	120140246	120155335	+	1422	1	Gm20767|-|-|13 D2.3|13|protein-coding	-0.531852	-0.532115	-0.530045	-0.530559	-0.529115	2.12216	0.416821	1
NM_001301639	chrX	42068398	42109664	+	6669	1	Xiap|1110015C02Rik|Aipa|Api3|Birc4|IAP3|ILP-1|MIHA|-|X|X A4|protein-coding	12.0606	12.0591	12.0406	12.0646	12.0525	-0.00907925	0.826408	0.97514
NR_030449	chr10	25867370	25894505	-	55	1	Mir680-3|Mirn680-3|-|12 A3|12|ncRNA	0	0	0	0	0	NA	1	1
NM_001044744	chr8	84886387	84893921	-	2106	1	Gcdh|9030411L18|AI266902|D17825|GCD|-|8 C3|8 41.28 cM|protein-coding	9.35359	9.32675	9.36609	9.37812	9.34037	0.047586	0.589407	0.934513
NM_133199	chr11	106318593	106349390	-	6572	1	Scn4a|Nav1.4|SkM1|mH2|-|11 E1|11 68.91 cM|protein-coding	-1.86719	-1.86737	-1.86631	-1.86759	-1.86764	0.260813	0.95441	1
NM_011323	chr15	100936271	101045938	+	11213	1	Scn8a|AI853486|C630029C19Rik|NaCh6|Nav1.6|dmu|med|mnd-2|mnd2|nmf2|nmf335|nmf58|nur14|seal|-|15 56.39 cM|15 F1|protein-coding	-0.416134	-0.41403	-0.414229	-0.41477	-0.414938	0.350508	0.885158	1
NM_146909	chr11	51006974	51007897	+	922	1	Olfr51|ID7|MOR129-3|-|11|11 B1.3|protein-coding	0	0	0	0	0	NA	1	1
NM_029389	chr14	34237035	34310503	-	3439	1	Fam35a|3110001K24Rik|-|14|14 B|protein-coding	9.07565	9.15926	9.04707	9.15226	9.1443	-0.006859	0.949889	0.991671
NR_045808	chr17	11863070	11883189	-	562	1	D17Ertd648e|-|-|17 A1|17|ncRNA	0	0	0	0	0	NA	1	1
NM_001085390	chr19	53529318	53541322	+	1150	1	Dusp5|Gm337|-|19|19 D2|protein-coding	6.67131	6.69371	6.5416	6.53552	6.55905	-1.04894	7.88761e-07	1.7146e-05
NM_001143689	chr17	35379617	35384674	+	1785	1	H2-Q4|H-2Q4|H2-Gs10|Qa-4|Qa4|Qat-4|Qb-1|Qb1|-|17 B1|17 18.65 cM|protein-coding	6.62561	6.57545	6.55672	6.56756	6.57483	-0.276468	0.217848	0.686904
NR_110491	chr18	23217596	23217818	+	222	1	Gm7788|EG665797|-|18|18 A2|pseudo	0	0	0	0	0	NA	1	1
NM_001081205	chr5	72647796	72671078	+	4197	1	Nipal1|3830408G10Rik|Npal1|-|5|5 C3.2|protein-coding	7.88242	7.85789	8.32761	8.33637	8.36923	2.06598	3.07001e-39	2.93175e-37
NM_001199210	chr16	90830859	90905109	+	2356	1	Eva1c|1700092M14Rik|4931408A02Rik|Fam176c|-|16|16 C3.3|protein-coding	7.67537	7.69466	7.74295	7.79573	7.76563	0.375018	0.015574	0.125016
NM_146867	chr17	38082032	38082976	-	943	1	Olfr131|MOR256-4|-|17|17 B1|protein-coding	0	0	0	0	0	NA	1	1
NM_033314	chr9	103008489	103087849	+	4017	1	Slco2a1|2310021C19Rik|Pgt|Slc21a2|mPgt|-|9 F1|9 54.72 cM|protein-coding	10.007	9.85348	10.0379	10.1199	10.1033	0.284582	0.00128912	0.0156583
NM_177235	chr1	33852052	33907621	-	2283	1	Bend6|B230209C24Rik|-|1|1 B|protein-coding	8.49391	8.49898	8.47447	8.4681	8.45437	-0.0945772	0.408606	0.851653
NM_001001885	chr19	5079337	5085477	-	3941	1	Tmem151a|AW125688|Gm961|Tmem151|-|19|19 A|protein-coding	8.4957	8.47053	8.42265	8.43506	8.43194	-0.161985	0.161031	0.606302
NM_001164578	chrX	151087094	151096543	-	3798	1	Tsr2|2310007F12Rik|-|X|X F3|protein-coding	10.5703	10.5784	10.6342	10.6118	10.6464	0.0888576	0.140227	0.565469
NM_028288	chrX	38531621	38576196	-	4972	1	Cul4b|2700050M05Rik|AA409770|CUL-4B|mKIAA0695|-|X|X A3.3|protein-coding	11.9122	11.9219	11.9275	11.8667	11.85	-0.0474731	0.316874	0.790301
NM_021549	chr7	44857146	44862929	+	2116	1	Pnkp|1810009G08Rik|PNK|-|7|7 B3|protein-coding	10.0836	10.0502	10.0996	10.0511	10.0797	0.0181605	0.799227	0.973682
NM_001045543	chr11	83511679	83522099	-	1839	1	Heatr9|Gm11435|OTTMUSG00000000990|-|11 C|11|protein-coding	3.06451	3.07628	3.06071	3.05846	3.06719	-0.654207	0.370545	0.827662
NM_011075	chr5	8798147	8866314	+	4314	1	Abcb1b|Abcb1|Mdr1|Mdr1b|Pgy-1|Pgy1|mdr|-|5 A1|5 3.43 cM|protein-coding	10.4721	10.5176	10.5431	10.5165	10.4967	0.0358593	0.572529	0.932136
NM_029870	chr17	26715650	26776626	+	7442	1	Crebrf|A930001N09Rik|LRF|-|17|17 A3.3|protein-coding	8.79799	8.86642	8.83634	8.77725	8.76437	-0.108995	0.326697	0.80081
NM_145840	chr7	35578996	35585582	-	6584	1	Rgs9bp|R9AP|Rgs9-1bp|-|7|7 B2|protein-coding	4.58401	4.56276	4.58701	4.57903	4.58202	0.291344	0.518909	0.907923
NM_012016	chr7	122169893	122186231	-	2964	1	Ern2|Ern1|Ire1|Ire1b|ire1-beta|mIre1|-|7 F2|7 65.53 cM|protein-coding	2.50134	2.49497	2.49619	2.4967	2.49717	-0.17234	0.84457	0.977633
NM_028980	chr12	103532565	103613832	+	3656	1	Ppp4r4|8430415E04Rik|mKIAA1622|-|12|12 E|protein-coding	-1.86719	-1.86737	-1.86631	-1.86759	-1.86764	0.260813	0.95441	1
NM_146343	chr2	90036921	90037850	+	928	1	Olfr1265|MOR228-2|-|2|2 E1|protein-coding	0	0	0	0	0	NA	1	1
NM_025669	chr4	21847583	21876475	+	4531	1	Pnisr|5730406M06Rik|AA673174|Pinsr|Sfrs18|Srsf18|-|4|4 A3|protein-coding	12.0406	11.9387	11.8671	11.9105	11.9282	-0.113236	0.0278532	0.194201
NM_001102677	chrX	25548501	25570449	-	912	1	Gm1993|-|-|X A2|X|protein-coding	-1.86719	-1.86617	-1.86745	-1.86762	-1.86768	-2.07879	0.647706	1
NM_146005	chr10	69533708	70027436	+	9980	1	Ank3|2900054D09Rik|AI314020|Ank-3|AnkG|Ankyrin-3|Ankyrin-G|-|10 B5.3|10 36.1 cM|protein-coding	10.108	10.0369	10.0813	10.1622	10.0353	0.0387943	0.639714	0.943384
NM_001162523	chr7	18065929	18077986	+	1499	1	Ceacam12|1600031J20Rik|Ceacam12-C1|Ceacam12-C3|Ceacam12C1|Ceacam12C3|-|7|7 A2|protein-coding	0	0	0	0	0	NA	1	1
NM_011274	chr7	37959992	38019552	-	3438	1	Uri1|C80913|NNX3|Rmp|-|7|7 B3|protein-coding	11.035	11.1066	11.134	11.1313	11.1343	0.0874041	0.110228	0.493764
NM_144938	chr6	124530344	124542321	-	2933	1	C1s1|AA959438|AI255193|AI327365|C1s|C1sa|-|6|6 F2|protein-coding	8.03536	8.06354	7.94351	7.95866	7.98069	-0.331546	0.0142933	0.117181
NM_011654	chr15	98931431	98934390	-	1556	1	Tuba1b|Tuba2|-|15|15 F1|protein-coding	14.169	13.8043	14.191	14.228	13.9665	0.156716	0.395946	0.845065
NM_024452	chr4	136469761	136549318	+	7522	1	Luzp1|2700072H04Rik|AI266952|Luzp|mFLJ00226|-|4 D3|4 68.8 cM|protein-coding	12.3891	12.3486	12.7566	12.8438	12.7751	0.528739	4.48507e-32	3.67484e-30
NM_026526	chr14	57549598	57571569	-	829	1	Eef1akmt1|2510005D08Rik|AW045965|Ayu21-96|Gt(pU21)96Imeg|GtAyu21-96|N6amt2|-|14|14 C3|protein-coding	9.44053	9.48422	9.47283	9.45585	9.44815	-0.00999437	0.906477	0.988406
NR_110516	chr3	99049822	99053742	+	1064	1	Gm12440|OTTMUSG00000006864|-|3 F2.2|3 43.03 cM|ncRNA	-1.86719	-1.86734	-1.86738	-1.86663	-1.86755	0.260813	0.95441	1
NR_045867	chr6	148606786	148614309	-	2559	1	Gm6313|EG622319|-|6 G3|6|ncRNA	2.52091	2.50871	2.50319	2.5086	2.51433	-0.695718	0.444934	0.871306
NM_001346528	chr12	84114328	84143510	+	5876	1	Dnal1|1700010H15Rik|AW121714|Dnalc1|E330027P08Rik|-|12|12 D1|protein-coding	10.0766	10.0264	9.95716	9.95957	9.98476	-0.14942	0.0392792	0.250299
NM_025882	chr6	82646712	82652865	-	1688	1	Pole4|2400007P05Rik|5830430F06Rik|-|6|6 C3|protein-coding	10.8216	10.7875	10.7793	10.7877	10.7698	-0.0380855	0.503968	0.898719
NM_138674	chr15	44457553	44597135	+	12661	1	Pkhd1l1|AB055648|PKHDL1|-|15|15 B3.2|protein-coding	-1.30565	-1.30803	-1.30813	-1.30839	-1.30658	-1.30728	0.688413	1
NM_001270487	chr16	89040923	89041472	-	547	1	Gm10228|ENSMUSG00000068074|-|16|16 C3.3|protein-coding	0	0	0	0	0	NA	1	1
NM_001347655	chr7	127208899	127214287	+	643	1	Mylpf|2410014J02Rik|MLC-2|Mlc2|-|7|7 F3|protein-coding	4.57117	4.58604	4.60475	4.59188	4.58976	0.529164	0.250152	0.728687
NM_001083967	chr18	69345721	69687967	+	7113	1	Tcf4|5730422P05Rik|ASP-I2|E2-2|E2.2|ITF-2|ITF-2b|ITF2|ME2|MITF-2A|MITF-2B|SEF-2|SEF2|SEF2-1|TFE|Tcf-4|bHLHb19|-|18|18 E2|protein-coding	10.5488	10.4507	10.4644	10.5078	10.5006	-0.012171	0.857708	0.980401
NM_001285428	chr2	52428320	52675859	-	7702	1	Cacnb4|3110038O15Rik|Cchb4|lh|-|2 C1.1|2 29.98 cM|protein-coding	2.15339	2.16109	2.16005	2.15721	2.1613	0.359502	0.730735	0.962722
NM_011540	chr11	98383811	98384953	+	944	1	Tcap|AI503981|AJ223855|-|11|11 D|protein-coding	1.68221	1.67984	1.67915	1.67913	1.6767	-0.55377	0.626944	1
NM_001190404	chr3	113147656	113156727	-	1336	1	Amy2b|Amy-X|Amy2-2|OTTMUSG00000022462|mAmy2-1|-|3 F3|3 49.35 cM|protein-coding	0	0	0	0	0	NA	1	1
NM_153578	chr7	55978484	56019573	-	1878	1	Nipa1|1110027G09Rik|A830014A18Rik|FSP3|Spg6|-|7|7 B5|protein-coding	7.71891	7.71495	7.67096	7.70986	7.73671	-0.0454306	0.769474	0.970195
NM_001037709	chr4	43381982	43427092	+	5287	1	Rusc2|AI840675|mKIAA0375|-|4|4 A5|protein-coding	10.6321	10.5715	10.6306	10.7232	10.7131	0.139816	0.0368134	0.238943
NM_010801	chr3	67374097	67400000	+	1107	1	Mlf1|HLS7|-|3 E1|3 30.91 cM|protein-coding	0	0	0	0	0	NA	1	1
NM_027158	chr5	136057267	136064324	+	1035	1	Upk3bl|2310043J07Rik|-|5|5 G2|protein-coding	4.21809	4.18693	4.20193	4.21157	4.21211	0.239075	0.657849	0.947523
NM_011723	chr17	73883895	73950196	-	4576	1	Xdh|XO|Xor|Xox-1|Xox1|-|17 E2|17 45.25 cM|protein-coding	12.2045	12.1212	12.0561	12.139	12.1018	-0.0804806	0.106804	0.483463
NM_177657	chr2	158195748	158229224	-	3899	1	D630003M21Rik|-|-|2|2 H1|protein-coding	0.746524	0.750765	0.750354	0.754575	0.745564	0.680195	0.723288	1
NM_017371	chr7	105591611	105600116	-	1468	1	Hpx|Hpxn|hx|-|7|7 E3|protein-coding	3.76336	3.76755	3.756	3.77115	3.76779	-0.0223998	0.969563	0.993796
NM_145145	chr2	32236683	32255005	+	2803	1	Pomt1|AI505244|-|2|2 B|protein-coding	10.6382	10.6101	10.5766	10.6158	10.5905	-0.0453952	0.453557	0.876079
NM_001038592	chr1	143739568	143749678	+	3597	1	Glrx2|1700010P22Rik|AI645710|Grx2|-|1 F|1 62.53 cM|protein-coding	9.07394	8.9926	8.98717	9.04683	9.05387	-0.00651638	0.950563	0.991671
NM_001166164	chr16	17646470	17650738	+	1268	1	Ccdc74a|2310015A05Rik|-|16|16 A3|protein-coding	6.80302	6.8266	6.80668	6.83792	6.81158	0.0274901	0.893709	0.986768
NM_028719	chr9	104569788	105034544	+	3636	1	Cpne4|3632411M23Rik|4933406O10Rik|-|9|9 F1|protein-coding	-1.30846	-1.30698	-1.30883	-1.30905	-1.3075	-1.12278	0.747659	1
NM_133967	chr8	120081095	120101472	-	2844	1	Zdhhc7|AL024087|Gramp2|-|8|8 E1|protein-coding	10.4603	10.4397	10.4982	10.5286	10.6048	0.154528	0.0257877	0.183685
NM_178755	chr2	90782744	90816231	+	3442	1	Agbl2|4930524K04|A430081C19Rik|CCP2|-|2|2 E1|protein-coding	1.75659	1.75895	1.74897	1.75158	1.75442	-1.15189	0.306517	1
NM_001270514	chrY	2900989	2912210	+	1569	4	Gm21693|-|-|Y A1|Y|protein-coding	0	0	0	0	0	NA	1	1
NR_040690	chr8	45160494	45165145	-	859	1	Gm6329|EG622523|-|8|8 B1.1|ncRNA	0	0	0	0	0	NA	1	1
NM_025370	chr13	64291836	64312710	-	964	1	Aaed1|1110018J18Rik|AI849003|-|13|13 B3|protein-coding	8.69804	8.66387	8.68228	8.72873	8.70302	0.069104	0.529852	0.915228
NM_011405	chr14	54369442	54417702	-	2269	1	Slc7a7|AI790233|my+lat1|-|14|14 C2|protein-coding	7.14946	7.14014	7.06776	7.12287	7.13033	-0.221299	0.248613	0.727041
NM_010579	chr2	155819837	155826925	-	1487	1	Eif6|1110004P11|AA408895|CAB|Itgb4bp|eIF-6|imc-415|p27(BBP)|p27BBP|-|2|2 H1|protein-coding	12.5906	12.6299	12.7292	12.7124	12.6962	0.125492	0.00114193	0.01412
NM_175171	chr13	102732489	103334492	-	10639	1	Mast4|4930420O11Rik|AI642422|mKIAA0303|-|13|13 D1|protein-coding	11.0714	10.9523	10.8703	11.0172	10.8956	-0.121747	0.105644	0.48041
NM_134052	chr12	28675207	28682174	+	1669	1	Adi1|AL024210|Fe-ARD|MTCBP-1|Ni-ARD|-|12|12 A2|protein-coding	10.7869	10.7591	10.7826	10.7528	10.7735	-0.00455902	0.936823	0.990382
NR_039573	chr15	80940039	80940120	+	81	1	Mir5113|mir-5113|mmu-mir-5113|mu-mir-5113|-|15 E1|15 37.94 cM|ncRNA	3.92443	3.90425	3.9083	3.91634	3.90603	-0.187043	0.738048	0.964257
NM_001003817	chr11	98412484	98437716	+	4969	1	Erbb2|Erbb-2|HER-2|HER2|Neu|c-erbB2|c-neu|l11Jus8|mKIAA3023|-|11 61.75 cM|11 D|protein-coding	10.9793	11.0059	10.9939	10.9849	10.9653	-0.0178923	0.7413	0.965329
NM_028480	chr7	17713252	17761121	+	3237	1	Ceacam5|1600029H12Rik|Psg30|-|7|7 A2|protein-coding	-1.86719	-1.86733	-1.86737	-1.86748	-1.86672	0.260813	0.95441	1
NM_001045516	chr11	78193392	78205763	+	1507	1	Proca1|4933404M19Rik|-|11|11 B5|protein-coding	4.44323	4.43829	4.45802	4.43816	4.4503	0.273394	0.561094	0.92921
NM_026519	chr2	112363019	112368027	-	968	1	Emc4|2610318K02Rik|Tmem85|-|2|2 E3|protein-coding	10.7493	10.7677	10.7177	10.7076	10.7698	-0.0404914	0.50119	0.897479
NR_030609	chr2	14261003	14261081	+	78	1	Mir511|Mirn511|mir-511|mmu-mir-511|-|2 A2|2|ncRNA	0	0	0	0	0	NA	1	1
NM_027295	chr5	41624973	41708179	-	1654	1	Rab28|2700023P08Rik|AW496496|-|5|5 B3|protein-coding	10.7954	10.8336	10.8182	10.8057	10.7623	-0.0308669	0.601419	0.938011
NM_001102578	chr7	86148042	86171724	-	2555	1	Vmn2r75|EG546981|-|7|7 D3|protein-coding	0	0	0	0	0	NA	1	1
NM_015795	chr14	65266701	65321502	+	1219	1	Fbxo16|4932435C24Rik|Fbx16|-|14|14 D1|protein-coding	0	0	0	0	0	NA	1	1
NM_172584	chr12	102568583	102704869	-	2844	1	Itpk1|BC031182|-|12|12 E|protein-coding	10.6729	10.6734	10.9901	10.9833	11.0017	0.483855	9.9453e-18	4.79835e-16
NM_133910	chr5	36490604	36582397	-	4574	1	Tbc1d14|2810413P16Rik|AU043625|C86258|D5Ertd110e|mKIAA1322|-|5 B3|5 19.15 cM|protein-coding	9.06261	9.03815	9.03237	9.06828	9.03029	-0.0148894	0.878197	0.984584
NM_172117	chr2	150749081	150771674	+	2484	1	Entpd6|2700026H11Rik|Cd39l2|NTPDase-6|-|2|2 G3|protein-coding	9.44418	9.34333	9.42844	9.40091	9.43417	0.0601573	0.51583	0.906602
NR_029424	chr18	74283100	74359984	+	2099	1	Cfap53|4933415I03Rik|Ccdc11|-|18|18 E2|protein-coding	2.16874	2.16374	2.16752	2.17403	2.16763	0.592687	0.573002	0.93214
NM_010139	chr4	141301221	141329384	+	3913	1	Epha2|AW545284|Eck|Myk2|Sek-2|Sek2|-|4 D3|4 73.67 cM|protein-coding	13.1886	13.1667	12.576	12.5827	12.5754	-0.730855	2.34337e-95	4.91646e-93
NM_033146	chr14	55581524	55585254	-	798	1	Emc9|1500005A01Rik|Cgi112|Fam158a|-|14|14 C3|protein-coding	6.58481	6.57107	6.59041	6.62306	6.61164	0.261061	0.242949	0.720677
NM_144830	chr11	101582242	101591785	+	2290	1	Tmem106a|0610008L10Rik|AI043106|BC022145|-|11|11 D|protein-coding	8.41844	8.44418	8.46188	8.48347	8.49801	0.155195	0.189317	0.654085
NM_001146023	chr7	29152510	29156210	-	1259	1	Fam98c|1110006G06Rik|AI836081|AV026483|B230110F21Rik|-|7|7 B1|protein-coding	8.40904	8.34934	8.36952	8.36806	8.38758	-0.0112175	0.927002	0.990382
NM_010086	chr8	40675077	40682199	+	2883	1	Adam24|Dtgn5|-|8|8 A4|protein-coding	0	0	0	0	0	NA	1	1
NM_080595	chr11	5106266	5152222	-	1895	1	Emid1|AW122071|CO-5|Emu1|-|11|11 A1|protein-coding	1.34577	1.34648	1.34137	1.34778	1.34188	-0.626419	0.633396	1
NR_024201	chr5	53698564	53698588	-	24	1	Rnu7|-|-|6 F2|6 59.17 cM|snRNA	0	0	0	0	0	NA	1	1
NM_029837	chr2	106695601	106868360	+	2366	1	Mpped2|239Fb|2700082O15Rik|AV354767|AW060960|-|2 E3|2 55.8 cM|protein-coding	0	0	0	0	0	NA	1	1
NM_027784	chr6	133292216	133295790	+	642	1	5530400C23Rik|GRP|-|6|6 G1|protein-coding	0	0	0	0	0	NA	1	1
NM_030229	chr15	81915030	81926213	-	2506	1	Polr3h|5031409G22Rik|RPC8|-|15|15 E1|protein-coding	10.4851	10.5138	10.5365	10.4954	10.5109	0.0221187	0.723334	0.962244
NM_207631	chrX	49726973	49727932	-	958	1	Olfr1321|MOR264-26|-|X|X A5|protein-coding	0	0	0	0	0	NA	1	1
NM_183254	chr10	39118808	39133895	-	723	1	Fam229b|1700025K23Rik|-|10|10 B1|protein-coding	6.13895	6.15668	6.12109	6.17265	6.14517	-0.0144214	0.957145	0.992083
NM_146701	chr19	12919363	12920307	-	943	1	Olfr1448|MOR202-5|-|19|19 A|protein-coding	0	0	0	0	0	NA	1	1
NR_045315	chr19	44828493	44835938	-	767	1	1700039E22Rik|-|-|19|19 C3|ncRNA	1.09058	1.0919	1.09366	1.09204	1.08984	0.191687	0.894858	1
NR_105031	chr4	59260051	59269144	+	1276	1	Gm12596|OTTMUSG00000007649|-|4 B3|4 32.47 cM|ncRNA	-1.35819	-1.35843	-1.3585	-1.3587	-1.35608	0.983711	0.818998	1
NM_001042485	chr1	134346097	134361999	-	3156	1	Tmem183a|1300007B12Rik|1700020N19Rik|Tmem183|-|1|1 E4|protein-coding	12.5929	12.6255	12.6375	12.6105	12.6362	0.0225974	0.55463	0.925659
NM_024214	chr8	126930664	126945921	-	4979	1	Tomm20|1810060K07Rik|BB284719|Gm19268|MAS20|MOM19|TOM20|mKIAA0016|-|8|8 E2|protein-coding	13.0277	13.1061	13.1234	13.0889	13.1111	0.0476541	0.232728	0.708106
NM_016803	chr10	60181528	60219260	-	6106	1	Chst3|C6ST|C6ST-1|GST-0|-|10|10 B4|protein-coding	6.57024	6.60592	6.65255	6.58439	6.60188	0.207455	0.389945	0.839542
NM_026163	chr16	16213345	16272712	+	2876	1	Pkp2|1200008D14Rik|1200012P04Rik|AA516617|Pkp2l|-|16|16 A2|protein-coding	10.1199	10.0768	10.0358	10.0216	10.0484	-0.110181	0.119211	0.51667
NR_045276	chr11	3452483	3458342	+	1836	1	8430429K09Rik|-|-|11|11 A1|ncRNA	7.47031	7.46365	7.49161	7.48971	7.4883	0.115726	0.472146	0.882336
NM_001317361	chr1	130388528	130423043	-	1019	1	Cd55b|AI323748|Daf|Daf-TM|Daf2|TM-DAF|-|1 E4|1 56.89 cM|protein-coding	0	0	0	0	0	NA	1	1
NM_027513	chr6	35177616	35247598	+	6183	1	Nup205|3830404O05Rik|AV248391|mKIAA0225|-|6|6 B1|protein-coding	12.8922	12.9255	12.908	12.8995	12.851	-0.0284736	0.467591	0.8801
NM_001310752	chr5	142484839	142545027	-	3699	1	Radil|AI536456|D930005D10Rik|-|5|5 G2|protein-coding	2.74842	2.73946	2.74957	2.75047	2.74366	0.440703	0.606403	0.939136
NM_007761	chr5	130029306	130060783	+	1462	1	Crcp|AL022669|-|5|5 G1.3|protein-coding	10.4963	10.5284	10.5075	10.5248	10.5301	0.0128182	0.835217	0.976797
NM_029412	chr3	29082577	29691056	+	2673	1	Egfem1|6130401L20Rik|Efcab11|-|3|3 A3|protein-coding	0	0	0	0	0	NA	1	1
NM_011413	chr17	34809092	34823454	-	5318	1	C4a|Slp|SlpA|-|17 B1|17 18.37 cM|protein-coding	7.84087	7.77857	7.7519	7.77113	7.7308	-0.244495	0.106463	0.48271
NM_007592	chr4	8141493	8239041	-	5711	1	Car8|AW546993|Ca8|Cals|Cals1|Carp|wdl|-|4 A1|4 3.53 cM|protein-coding	-1.26944	-1.26793	-1.26983	-1.26832	-1.27006	-1.12315	0.744474	1
NM_146630	chr17	37795446	37796375	+	928	1	Olfr123|MOR256-9|-|17|17 B1|protein-coding	0	0	0	0	0	NA	1	1
NM_028965	chr11	96767549	96777555	-	2570	1	Snx11|4933439F10Rik|A930041K09Rik|AI117694|-|11|11 D|protein-coding	9.81177	9.85762	9.79423	9.79442	9.74059	-0.112965	0.150822	0.58483
NM_001310677	chr5	98854415	98884053	+	6297	1	Bmp3|9530029I04Rik|-|5 E3|5 48.24 cM|protein-coding	0.635109	0.628886	0.631021	0.633987	0.631794	0.136658	0.938373	1
NM_024435	chr10	102481756	102490418	-	1174	1	Nts|5033428E16Rik|NMN-125|NN|NT|NT/N|NTS1|-|10|10 D1|protein-coding	0	0	0	0	0	NA	1	1
NM_145941	chr16	20672727	20692883	+	5404	1	Eif4g1|E030015G23Rik|eIF-4-gamma 1|eIF-4G 1|eIF-4G1|eIF4GI|-|16|16 B1|protein-coding	15.3135	15.2834	15.3118	15.3083	15.286	0.00423546	0.884237	0.984626
NM_001039169	chr1	87213939	87228858	+	2251	1	Eif4e2|2700069E09Rik|AI036339|AV129531|D0H0S6743E|Eif4el3|-|1|1 C5|protein-coding	12.3875	12.4059	12.4138	12.4281	12.4121	0.0263545	0.494539	0.893933
NM_028664	chr1	161142712	161170507	+	3714	1	Ankrd45|4933409K03Rik|-|1|1 H2.1|protein-coding	1.4596	1.45556	1.45521	1.46503	1.45901	0.608395	0.660356	1
NM_001033161	chr8	105258575	105264594	-	1378	1	Tradd|9130005N23Rik|AA930854|-|8 D3|8 53.04 cM|protein-coding	8.71011	8.76164	8.79894	8.76136	8.8098	0.14559	0.185167	0.647317
NM_025901	chr2	181864360	181870826	+	2916	1	Polr3k|12.3kDa|1500004O14Rik|AI196849|AU014893|C11|RPC10|RPC11|-|2|2 H4|protein-coding	11.1709	11.2678	11.2757	11.2068	11.254	0.0336503	0.566444	0.929991
NM_013492	chr14	65968483	65981548	+	1800	1	Clu|AI893575|ApoJ|Cli|D14Ucla3|SP-40|Sgp-2|Sgp2|Sugp-2|-|14 D1|14 34.36 cM|protein-coding	6.88089	6.84122	6.89938	6.84736	6.87777	0.0989927	0.63763	0.943384
NM_026849	chr6	113237843	113281392	+	2655	1	Mtmr14|1110061O04Rik|AW553738|C76151|-|6|6 E3|protein-coding	11.0186	11.0388	11.0333	11.0852	11.0521	0.0412349	0.450353	0.874785
NM_010637	chr4	55527137	55532475	-	3037	1	Klf4|EZF|Gklf|Zie|-|4 B3|4 29.76 cM|protein-coding	9.31711	9.26246	9.09627	9.14357	9.15586	-0.354722	0.000203342	0.0030082
NM_001007581	chr2	165490112	165493314	-	1864	1	Trp53rka|2810408M09Rik|-|2|2 H3|protein-coding	9.60709	9.64864	9.65508	9.69069	9.68886	0.0994482	0.219677	0.689033
NM_031257	chr8	25039144	25101811	-	4971	1	Plekha2|6430512N22Rik|AI851530|AU041791|TAPP2|W91773|-|8|8 A2|protein-coding	12.724	12.7691	12.7097	12.6601	12.7024	-0.0698104	0.0810765	0.408403
NM_198166	chr16	27353322	27370239	-	828	1	Uts2b|Gm538|U2B|Urp|Uts2d|-|16|16 B2|protein-coding	0	0	0	0	0	NA	1	1
NM_146618	chr7	86526759	86527691	+	931	1	Olfr297|MOR220-3|-|7|7 D3|protein-coding	0	0	0	0	0	NA	1	1
NM_145833	chr4	134003330	134018816	-	3474	1	Lin28a|AL024421|ENSMUSG00000070700|Gm10299|Lin-28|Lin28|Tex17|lin-28A|-|4|4 D3|protein-coding	-0.374196	-0.369705	-0.374459	-0.371003	-0.374658	-1.17457	0.658778	1
NR_126429	chr4	138137580	138138518	-	750	1	1700095J12Rik|-|-|4|4 D3|ncRNA	1.21535	1.20897	1.21771	1.21382	1.2133	0.97163	0.531297	1
NM_021457	chr5	4753839	4758216	-	4375	1	Fzd1|AW227548|FZ-1|Fz1|-|5 A1|5 2.61 cM|protein-coding	7.34222	7.29447	7.44257	7.43967	7.42216	0.652438	0.00023111	0.00337928
NM_001025606	chr13	98686238	98694831	-	1149	1	Tmem171|Gm905|-|13|13 D1|protein-coding	8.46763	8.45634	8.14102	8.12499	8.1129	-1.06604	4.38508e-19	2.28272e-17
NM_009053	chr11	120780745	120784204	-	2108	1	Rfng|-|-|11 E2|11 84.53 cM|protein-coding	9.21272	9.17319	9.16467	9.14527	9.22588	-0.030158	0.758493	0.968095
NM_009974	chr8	95446096	95488820	-	3752	1	Csnk2a2|1110035J23Rik|C77789|CK2|-|8 C5|8 47.12 cM|protein-coding	10.2199	10.1889	10.195	10.238	10.2448	0.0393591	0.566867	0.930244
NM_025583	chr8	111686510	111691010	-	878	1	Ctrb1|2200008D09Rik|AI504462|Ctrb|Prt-2|-|8 E1|8 57.98 cM|protein-coding	-1.86719	-1.86734	-1.86738	-1.86663	-1.86755	0.260813	0.95441	1
NM_146647	chr2	87902742	87903674	-	931	1	Olfr1154|MOR173-2|-|2|2 D|protein-coding	0	0	0	0	0	NA	1	1
NR_130781	chr6	30653457	30693749	-	3568	1	Cep41|1700017E11Rik|2810431D15Rik|Tsga14|-|6|6 A3.3|protein-coding	8.32802	8.34762	8.2618	8.27548	8.28099	-0.213398	0.0780806	0.397494
NM_146890	chr17	37850594	37851553	+	958	1	Olfr126|MOR218-1|-|17|17 B1|protein-coding	0	0	0	0	0	NA	1	1
NM_025432	chrX	166440755	166453140	+	1425	1	Trappc2|1110066L09Rik|1810064C02Rik|AW496358|MIP-2A|Sedl|TRS20|-|X|X F5|protein-coding	9.39745	9.44733	9.47717	9.37898	9.38575	-0.0200484	0.832884	0.976541
NR_038016	chr10	54075922	54081081	+	1227	1	Gm16998|-|-|10 B3|10 27.48 cM|ncRNA	0	0	0	0	0	NA	1	1
NM_029285	chr5	30466077	30484087	+	706	1	1700001C02Rik|1700047H18Rik|-|5|5 B1|protein-coding	0	0	0	0	0	NA	1	1
NM_001130176	chr1	135840861	135852261	+	1094	1	Tnnt2|Tnt|cTnT|-|1 E4|1 59.32 cM|protein-coding	11.8857	11.8812	12.0511	11.9578	12.066	0.186037	0.000339707	0.00480483
NM_027652	chr5	30232581	30272430	+	6794	1	Selenoi|4933402G07Rik|AI448296|AI452230|C79563|D5Wsu178e|Ept1|SELI|mKIAA1724|-|5 B1|5 16.22 cM|protein-coding	11.2777	11.3269	11.2816	11.2973	11.2647	-0.0314898	0.539451	0.91948
NM_029342	chr1	74967346	75046639	-	840	1	Nhej1|1700029B21Rik|XLF|cernunnos|-|1|1 C4|protein-coding	7.67824	7.66452	7.70249	7.67706	7.6993	0.0980991	0.517465	0.906915
NM_001081182	chr3	89939481	89963332	-	5427	1	Atp8b2|Id|-|3|3 F1|protein-coding	12.0885	12.0292	12.0922	12.1151	12.0906	0.0533651	0.222899	0.694092
NR_040714	chr9	50488799	50504805	-	1116	1	Plet1os|2310014F07Rik|-|9|9 A5.3|ncRNA	0	0	0	0	0	NA	1	1
NM_001253705	chr10	128747879	128766568	+	1319	1	Pym1|A030010B05Rik|Pym|Wibg|-|10|10 D3|protein-coding	10.0186	10.0213	10.0317	10.0875	10.086	0.0882552	0.223508	0.695485
NM_145684	chr11	70315613	70322518	-	2293	1	Alox12e|8-LOX|AW259591|Alox12-ps1|Alox12-ps2|Aloxe|e-LOX1|-|11 B3|11 42.99 cM|protein-coding	0	0	0	0	0	NA	1	1
NM_172626	chr18	42275353	42341540	+	6242	1	Rbm27|A730010I06|AI043120|Psc1|mKIAA1311|-|18|18 B3|protein-coding	11.3771	11.3739	11.3107	11.3612	11.3077	-0.0676702	0.184854	0.647213
NR_031758	chr5	74093530	74093650	+	120	1	Snora26|MBI-6|-|5 C3.3|5 39.38 cM|snoRNA	4.9785	4.98367	4.97512	4.97714	4.97858	-0.0946581	0.800535	0.973682
NM_016854	chr19	36731731	36736604	-	2672	1	Ppp1r3c|PTG|Ppp1r5|-|19|19 C2|protein-coding	0	0	0	0	0	NA	1	1
NM_013640	chr8	105935728	105938392	-	1260	1	Psmb10|Mecl-1|Mecl1|-|8 D3|8 53.06 cM|protein-coding	7.79283	7.84063	7.85638	7.85764	7.84185	0.143683	0.32805	0.801319
NM_054073	chr6	30896981	30915573	-	1131	1	Tsga13|1700023D02Rik|Vme1|-|6|6 A3.3|protein-coding	-1.26938	-1.26967	-1.26802	-1.26831	-1.26998	1.25621	0.719277	1
NM_146670	chr10	129901776	129902726	-	949	1	Olfr815|MOR113-3|-|10|10 D3|protein-coding	-1.86719	-1.86733	-1.86737	-1.86748	-1.86672	0.260813	0.95441	1
NR_029654	chr9	51103034	51103110	-	76	1	Mir34c|Mirn34c|mir-34c|mmu-mir-34c|-|9|9 A5.3|ncRNA	0	0	0	0	0	NA	1	1
NM_028973	chr16	30269302	30283254	-	5304	1	Lrrc15|5430427N11Rik|LIB|-|16|16 B2|protein-coding	0	0	0	0	0	NA	1	1
NR_029971	chr11	78073170	78073241	+	71	1	Mir451a|Mir451|Mirn451|mir-451a|mmu-mir-451|mmu-mir-451a|-|11|11 B5|ncRNA	-0.938938	-0.939269	-0.939361	-0.93618	-0.937953	1.63331	0.610096	1
NM_145953	chr3	157894248	157925063	-	1787	1	Cth|0610010I13Rik|AI314617|BC019483|CSE|Cys3|-|3|3 H4|protein-coding	0.58605	0.590345	0.589946	0.590649	0.586857	0.442384	0.808399	1
NM_008388	chr15	43250040	43282736	-	1526	1	Eif3e|48kDa|Eif3s6|Int6|eIF3-p46|eIF3-p48|-|15 B3.2|15 16.73 cM|protein-coding	13.4784	13.5738	13.5718	13.5475	13.5793	0.0457712	0.256638	0.736664
NM_010867	chr17	71019557	71126856	+	5573	1	Myom1|D430047A17Rik|-|17|17 E1.3|protein-coding	4.47657	4.47969	4.45336	4.4832	4.47782	-0.206216	0.665308	0.948537
NM_178762	chr2	130417684	130424288	-	3496	1	Pced1a|A930025D01Rik|AI480484|Fam113a|-|2|2 F1|protein-coding	9.34476	9.32286	9.37379	9.33863	9.35981	0.052242	0.552438	0.924834
NM_019800	chr3	97158777	97176576	+	1744	1	Acp6|5730559A09Rik|ACPL1|AU022842|mPACPL1|-|3|3 F2.1|protein-coding	6.31717	6.31576	6.29277	6.29687	6.28762	-0.232306	0.325455	0.80003
NM_001305221	chr3	55045469	55055055	-	1574	1	Ccna1|-|-|3|3 C|protein-coding	-1.35819	-1.35843	-1.3585	-1.3587	-1.35608	0.983711	0.818998	1
NM_001038846	chr1	165648945	165708094	-	2572	1	Rcsd1|A430105K13Rik|BC025872|CapZIP|-|1|1 H2.3|protein-coding	1.12479	1.13085	1.12564	1.12255	1.12571	-0.948647	0.499549	1
NM_011519	chr12	8771396	8793687	+	3049	1	Sdc1|AA408134|AA409076|CD138|Sstn|Synd|Synd1|syn-1|-|12 A1.1|12 3.94 cM|protein-coding	12.968	13.0187	13.0355	13.0192	13.0548	0.0513972	0.17142	0.625534
NM_001347213	chr6	50293327	50456354	-	7138	1	Osbpl3|1200014M06Rik|6720421I08Rik|A530055M08|ORP-3|ORP3|OSBP3|-|6|6 B2.3|protein-coding	10.567	10.4983	10.3829	10.4135	10.3848	-0.22256	0.000627213	0.00830692
NR_030423	chr5	24592114	24592211	+	97	1	Mir671|Mirn671|mmu-mir-671|-|5 A3|5|ncRNA	5.29352	5.27319	5.30839	5.27796	5.28477	0.134705	0.705681	0.958688
NM_177266	chr13	97137937	97176443	+	3167	1	Gfm2|6530419G12Rik|A930009M04Rik|EF-G2mt|EFG2|MST027|RRF2mt|-|13|13 D1|protein-coding	10.0058	9.93034	9.96465	9.91346	9.91729	-0.0655576	0.395656	0.845065
NM_025774	chr5	136180357	136198954	-	1646	1	Prkrip1|8430424D23Rik|C114|-|5|5 G2|protein-coding	9.42791	9.43686	9.44385	9.44046	9.47833	0.0469177	0.583004	0.933386
NR_027636	chr1	83159762	83210572	+	1635	1	Daw1|4930563E19Rik|4933429D11Rik|Wdr69|b2b1116Clo|b2b1584Clo|-|1|1 C5|protein-coding	-1.29322	-1.29347	-1.29354	-1.29077	-1.29375	1.08189	0.794161	1
NM_009535	chr5	32611171	32687066	+	4594	1	Yes1|Yes|p61-Yes|-|5 B1|5 17.33 cM|protein-coding	11.1768	11.2232	11.1486	11.099	11.1049	-0.12033	0.0255279	0.182302
NM_013486	chr3	101275908	101287939	-	1137	1	Cd2|LFA-2|Ly-37|Ly37|-|3 F2.2|3 44.17 cM|protein-coding	0	0	0	0	0	NA	1	1
NM_018769	chr6	50207403	50261769	-	2121	1	Dfna5|2310037D07Rik|4932441K13Rik|Dfna5h|EG14210|Fin15|-|6|6 B2.3|protein-coding	10.2839	10.2868	10.2358	10.1865	10.2296	-0.115496	0.0861371	0.424614
NR_105940	chr17	35204475	35204557	-	82	1	Mir6974|Gm27658|mmu-mir-6974|-|17|17 B1|ncRNA	0	0	0	0	0	NA	1	1
NM_013489	chr1	171839697	171890718	+	3281	1	Cd84|A130013D22Rik|CDw84|SLAMF5|-|1 H3|1 79.54 cM|protein-coding	5.32525	5.31329	5.3206	5.30658	5.32442	-0.0362573	0.914961	0.988977
NM_001162365	chr14	66153257	66281052	-	3989	1	Ptk2b|CADTK|CAKB|CAKbeta|E430023O05Rik|FADK2|FAK2|PYK2|Raftk|-|14 D1|14 34.36 cM|protein-coding	11.1187	11.111	10.9742	10.9575	10.9616	-0.218975	3.02345e-05	0.000515645
NM_198299	chr8	105703652	105708168	-	1267	1	Enkd1|AI606951|E130303B06Rik|-|8|8 D3|protein-coding	9.73371	9.73201	9.72958	9.66792	9.68115	-0.0786692	0.324514	0.799536
NM_021434	chr14	118137127	118164232	+	2866	1	Gpr180|AB041545|E130016I23Rik|Itr|-|14|14 E4|protein-coding	9.4899	9.53633	9.58663	9.48507	9.50759	0.0256609	0.779413	0.972001
NM_019516	chr19	7596661	7607176	-	2744	1	Lgals12|AW987437|Grip1|-|19|19 A|protein-coding	1.20149	1.20748	1.20008	1.20104	1.20403	-0.781595	0.569907	1
NM_001347455	chr6	126923416	126939587	-	1856	1	Rad51ap1|2510006L10Rik|RAB22|-|6 F3|6 61.92 cM|protein-coding	10.665	10.6715	10.635	10.6353	10.6487	-0.044504	0.446655	0.872678
NM_024270	chr13	19357676	19395813	-	1334	1	Stard3nl|0610035N01Rik|6530409L22Rik|AW124774|MENTHO|-|13|13 A2|protein-coding	9.43725	9.50961	9.49718	9.48763	9.49914	0.0405547	0.638946	0.943384
NM_001039244	chr13	119488039	119610459	+	1807	1	Tmem267|EG633640|Gm7120|-|13|13 D2.3|protein-coding	4.63821	4.63513	4.64521	4.63801	4.61758	-0.0878343	0.842081	0.976797
NM_008159	chr12	52023004	52028063	-	1383	1	Gpr33|-|-|12|12 C1|protein-coding	0	0	0	0	0	NA	1	1
NM_025763	chrX	67919864	67921450	-	1422	1	4933436I01Rik|-|-|X|X A7.1|protein-coding	0	0	0	0	0	NA	1	1
NM_001310769	chr1	94020493	94028330	+	4584	1	Neu4|9330166I04|-|1|1 D|protein-coding	0	0	0	0	0	NA	1	1
NM_001025560	chr7	115470872	116031047	-	8647	1	Sox6|AI987981|SOX-LZ|-|7 F1|7 61.29 cM|protein-coding	0.893942	0.887017	0.886722	0.885917	0.889184	-1.09097	0.472409	1
NM_020020	chrX	154985775	154995850	-	1640	1	Magea8|Mage-a8|-|X F3|X 72.38 cM|protein-coding	8.23211	8.23938	8.25776	8.23047	8.27123	0.0595349	0.637288	0.943384
NM_028958	chrX	134460116	134476490	-	1920	1	Taf7l|4933438I11Rik|Taf2q|-|X|X E3|protein-coding	2.81128	2.81218	2.81079	2.81958	2.80921	0.148757	0.855312	0.980015
NM_001025379	chr14	31217873	31229511	+	3668	1	Sema3g|AK129018|-|14|14 B|protein-coding	4.73674	4.72034	4.73062	4.72388	4.72823	-0.0239999	0.953876	0.992083
[truncated: 22,538 more rows]

## Sheet: RNA-seq_GRKO
Transcript/RepeatID	chr	start	end	strand	Length	Copies	Annotation/Divergence	GRKO_NT-rep1 (53562573.0 total)	GRKO_NT-rep2 (34011665.0 total)	GRKO_Dex-rep1 (72996569.0 total)	GRKO_Dex-rep2 (56457200.5 total)	GRKO_Dex-rep3 (51667410.5 total)	NT vs. Dex Log2 Fold Change	NT vs. Dex p-value	NT vs. Dex adj. p-value
NM_001252347	chr11	102393403	102402939	+	3033	1	Rundc3a|RPIP-8|Rap2ip|Rpip8|-|11|11 D|protein-coding	9.05036	9.08967	9.05931	9.05107	9.02693	-0.136505	0.177777	0.998189
NM_146457	chr15	98437470	98438397	+	926	1	Olfr282|MOR160-2|-|15|15 F1|protein-coding	0	0	0	0	0	NA	1	1
NR_030706	chrX	61116378	61139460	+	861	1	C230004F18Rik|-|-|X|X A6|ncRNA	0	0	0	0	0	NA	1	1
NM_011131	chr7	44532744	44548815	-	3396	1	Pold1|125kDa|-|7 B3|7 28.83 cM|protein-coding	12.3578	12.346	12.3287	12.3108	12.3503	-0.0411218	0.305791	0.999671
NR_046001	chr7	25228723	25230264	+	1541	1	9130221H12Rik|AU016887|-|7|7 A3|ncRNA	10.7096	10.691	10.7188	10.7031	10.6965	0.0158553	0.783913	0.999671
NM_001291801	chr13	54051184	54054780	-	3478	1	Drd1|C030036C15Rik|Drd-1|Drd1a|Gpcr15|-|13 B1|13 28.4 cM|protein-coding	0	0	0	0	0	NA	1	1
NM_172863	chr3	98382481	98431949	+	5159	1	Zfp697|9430053K19|AI467503|Znf697|-|3|3 F2.2|protein-coding	8.42374	8.40419	8.41961	8.43311	8.44071	0.138769	0.245976	0.999671
NM_018786	chr15	99295409	99317007	+	3131	1	Prpf40b|2610317D23Rik|Hypc|-|15|15 F1|protein-coding	9.99112	9.95424	9.93984	9.94427	9.95357	-0.101777	0.160021	0.984521
NM_026504	chr5	115279702	115296972	+	1992	1	Coq5|1810014G04Rik|D5Ertd33e|-|5 F|5 56.03 cM|protein-coding	10.1213	10.1632	10.1451	10.1424	10.1389	0.000955584	0.989015	0.999671
NR_045578	chr3	104864506	104930063	+	5976	1	St7l|St7r|-|3|3 F2.2|protein-coding	9.97973	9.95925	9.96661	9.97883	9.98939	0.030881	0.666818	0.999671
NM_174876	chr16	56204313	56273753	+	6890	1	Impg2|IPM200|PG10.2|Rsbp|Spacrcan|-|16|16 C1.1|protein-coding	1.0338	1.03376	1.03223	1.03305	1.03319	-1.00712	0.471911	1
NM_053214	chr17	33555707	33607764	+	3803	1	Myo1f|C330006B10Rik|-|17 B1|17 17.98 cM|protein-coding	-1.26374	-1.2636	-1.26446	-1.26441	-1.26438	-2.94437	0.304097	1
NM_001081249	chr13	89655310	89742512	-	12415	1	Vcan|5430420N07Rik|9430051N09|Cspg2|DPEAAE|NG2|PG-M|PG-M(V0)|PG-M(V1)|hdf|-|13 C3|13 45.5 cM|protein-coding	5.11409	5.11537	5.11183	5.11498	5.11544	-0.0436972	0.901211	1
NM_009634	chr15	80948490	80970947	+	3697	1	Adsl|Adl|Asl|-|15 E1|15 37.95 cM|protein-coding	11.8141	11.833	11.8311	11.8247	11.8175	0.0028493	0.947378	0.999671
NR_105896	chr11	102999848	102999921	-	73	1	Mir6931|Gm27303|mmu-mir-6931|-|11|11 E1|ncRNA	-1.26137	-1.26179	-1.26196	-1.26139	-1.2619	-0.887108	0.787664	1
NM_011326	chr7	121734479	121768482	+	2983	1	Scnn1g|SCNEG|-|7 F2|7 65.07 cM|protein-coding	0	0	0	0	0	NA	1	1
NM_174850	chr5	139706693	139736333	-	3327	1	Micall2|A930021H16Rik|JRAB|MICAL-L2|mFLJ00139|-|5|5 G2|protein-coding	10.1617	10.1548	10.1362	10.1439	10.1685	-0.030639	0.653039	0.999671
NM_001310512	chr5	28200819	28245788	-	2994	1	Cnpy1|1500012D20Rik|9630008K15Rik|AI853839|-|5|5 B1|protein-coding	0	0	0	0	0	NA	1	1
NM_176831	chr9	57412660	57440114	-	2746	1	Ppcdc|1810057I13Rik|8430432M10Rik|-|9|9 B|protein-coding	8.98254	8.96026	8.96161	8.95664	8.96719	-0.0591921	0.54297	0.999671
NM_028913	chr7	43607169	43618279	+	2405	1	Zfp819|4930427I11Rik|4933405K07Rik|-|7|7 B3|protein-coding	-0.877269	-0.877149	-0.876331	-0.877277	-0.876655	1.88281	0.524955	1
NM_030704	chr5	116408491	116422864	-	1811	1	Hspb8|AU018630|AW413033|Cryac|D5Ucla4|E2IG1|H11|H11K|HSP20-like|HSP22|-|5 F|5 56.41 cM|protein-coding	12.1707	12.1706	12.1731	12.2004	12.1785	0.0254562	0.529258	0.999671
NM_009672	chr9	62341343	62378805	+	2083	1	Anp32a|Anp32|I1PP2A|LANP|PHAP1|W91701|pp32|-|9 B|9 33.68 cM|protein-coding	12.3623	12.3957	12.3798	12.3544	12.3696	-0.0194363	0.62702	0.999671
NM_019702	chr10	21295979	21368889	+	2773	1	Hbs1l|2810035F15Rik|AI326327|eRFS|-|10|10 A3|protein-coding	12.2272	12.2428	12.2529	12.2428	12.2434	0.0221707	0.572718	0.999671
NM_010858	chr11	104550663	104587219	+	872	1	Myl4|ALC1|AMLC|ELC|ELC1a|GT1|MLC1a|Myla|-|11 E1|11 67.79 cM|protein-coding	5.40748	5.40976	5.41422	5.41533	5.41395	0.3388	0.295447	1
NM_011155	chr7	17004641	17027914	-	2054	1	Ppp5c|AU020526|PP5|-|7 A2|7 9.15 cM|protein-coding	11.6707	11.6876	11.6747	11.7004	11.7223	0.0425179	0.366587	0.999671
NM_018870	chr11	5801637	5803796	-	901	1	Pgam2|-|-|11|11 A1|protein-coding	6.06218	6.05883	6.06092	6.05751	6.06603	0.0342929	0.894085	1
NM_178392	chr12	73964530	73984820	+	2113	1	Snapc1|2700033G17Rik|AU015787|-|12|12 C3|protein-coding	8.9092	8.92142	8.92417	8.9188	8.92322	0.0426862	0.662832	0.999671
NR_131051	chr7	121589903	121591591	+	628	1	1700025J12Rik|-|-|7|7 F2|ncRNA	0	0	0	0	0	NA	1	1
NM_080420	chr11	87806428	87826114	-	2912	1	Lpo|5830499B15Rik|-|11|11 C|protein-coding	0	0	0	0	0	NA	1	1
NM_001081225	chr19	44931119	44983787	+	6858	1	Fam178a|3632432H19|6030443O07Rik|AU014917|Slf2|-|19|19 C3|protein-coding	12.5581	12.5261	12.5736	12.5823	12.5842	0.0668956	0.0784487	0.874962
NM_030172	chr12	99717531	99883442	-	2061	1	Efcab11|2610021K21Rik|2610110A13Rik|-|12|12 E|protein-coding	8.9271	8.94217	8.9566	8.97832	8.91795	0.101891	0.352677	0.999671
NM_008810	chrX	160122219	160138430	-	2842	1	Pdha1|Pdha-1|-|X F4|X 73.95 cM|protein-coding	13.061	13.0725	13.0853	13.0995	13.0805	0.0367811	0.28082	0.999671
NM_009599	chr5	137288254	137294466	+	2202	1	Ache|-|-|5 G2|5 76.32 cM|protein-coding	4.89476	4.8902	4.89667	4.88671	4.8846	-0.24241	0.546855	1
NM_133906	chr5	138085084	138107822	+	8253	1	Zkscan1|5930429A01Rik|9130423L19Rik|9230118B16Rik|AI646829|AI788588|C87323|KOX18|PHZ-37|ZNF139|-|5|5 G2|protein-coding	12.1795	12.1152	12.1433	12.1294	12.1431	-0.0191715	0.666989	0.999671
NM_021518	chr4	8535644	8607702	+	2047	1	Rab2a|9330148M11Rik|C80220|Rab2|-|4|4 A1|protein-coding	13.3604	13.3982	13.3917	13.3657	13.3275	-0.0277239	0.473711	0.999671
NM_198410	chr3	88364589	88368541	+	1660	1	Paqr6|1500001B10Rik|-|3|3 F1|protein-coding	1.72319	1.72476	1.72482	1.72369	1.7239	0.122759	0.914682	1
NM_001190330	chr8	104734003	104741634	+	1852	1	Ces2a|9130231C15Rik|AI266984|Ces6|-|8|8 D3|protein-coding	0	0	0	0	0	NA	1	1
NM_146145	chr4	101151974	101265282	-	5272	1	Jak1|AA960307|BAP004|C130039L05Rik|-|4 C6|4 46.19 cM|protein-coding	12.7549	12.7427	12.7617	12.7387	12.755	0.00513233	0.887257	0.999671
NR_105871	chr10	60126776	60126833	+	57	1	Mir6906|mmu-mir-6906|-|10|10 B4|ncRNA	0	0	0	0	0	NA	1	1
NR_003962	chr3	64632863	64844743	-	2252	1	Vmn2r-ps11|4930518C23Rik|-|3|3 E1|pseudo	0	0	0	0	0	NA	1	1
NM_029557	chr11	115814739	115823102	+	1959	1	Tsen54|0610034P02Rik|-|11|11 E2|protein-coding	10.3734	10.3488	10.3309	10.3082	10.3624	-0.0870427	0.20021	0.999671
NM_144917	chr6	72565922	72598413	-	2220	1	Elmod3|AI844780|C330008I15Rik|RBM29|Rbed1|-|6|6 C1|protein-coding	7.58263	7.58568	7.58987	7.6099	7.58489	0.145876	0.356851	1
NM_152812	chr4	14809505	14826587	-	3250	1	Otud6b|2600013N14Rik|AU015433|-|4|4 A1|protein-coding	12.4555	12.4454	12.4768	12.461	12.4653	0.0314068	0.404898	0.999671
NM_146715	chr1	174249889	174250976	-	1085	1	Olfr419|MOR267-6|-|1|1 H3|protein-coding	-0.70899	-0.710131	-0.710282	-0.710251	-0.709598	-1.73446	0.528728	1
NM_001163795	chr17	48264295	48275358	+	1737	1	Treml4|5031403H21Rik|BB137214|IDCP1|TLT-4|TLT4|Treml3|-|17|17 C|protein-coding	0.574931	0.574464	0.575226	0.576072	0.575591	1.80028	0.359189	1
NR_138462	chr2	12106634	12301944	-	5814	1	Itga8|AI447669|-|2 A1|2 9.12 cM|protein-coding	3.64109	3.63878	3.64308	3.64478	3.64324	0.760316	0.222339	1
NR_130333	chr2	10466663	10466746	+	83	1	Mir466m|mmu-mir-466m|-|2 A1|2 8.22 cM|ncRNA	-1.86732	-1.86725	-1.86736	-1.86702	-1.86731	0.479068	0.916367	1
NM_178337	chr13	13997951	14039638	-	1826	1	Tbce|2610206D02Rik|C530005D02Rik|pmn|-|13 A1|13 5.29 cM|protein-coding	10.5932	10.5483	10.5794	10.5821	10.588	0.0334166	0.588219	0.999671
NM_001286502	chr2	129686549	129698658	-	2310	1	Pdyn|Dyn|-|2 F1|2 63.19 cM|protein-coding	0	0	0	0	0	NA	1	1
NR_029539	chr17	17830812	17830879	+	67	1	Mir125a|Mirn125a|-|17|17 A3.2|ncRNA	3.03399	3.03228	3.03457	3.03484	3.03544	0.538301	0.473269	1
NM_001100464	chr7	34011919	34013942	-	575	1	Scgb2b27|Abpbg27|Abpbg5|Scgb2b5|-|7|7 B1|protein-coding	0	0	0	0	0	NA	1	1
NM_001101483	chr9	100552188	100571085	-	1581	1	Slc35g2|Gm519|Tmem22|-|9|9 E3.3|protein-coding	3.31856	3.3218	3.32019	3.32248	3.32003	0.173045	0.795481	1
NM_019742	chr9	107563255	107566108	+	1656	1	Tusc2|1190001E22Rik|AA407686|Fus1|Lgcc|PAP|Pdap2|-|9|9 F1|protein-coding	9.22909	9.23312	9.23055	9.23748	9.22439	-0.00109993	0.990078	0.999671
NR_110441	chr6	52262775	52267603	+	2877	1	Hottip|ENSMUSG00000055408|Gm15053|OTTMUSG00000018874|-|6 B3|6|ncRNA	0	0	0	0	0	NA	1	1
NR_033626	chr7	145205818	145208119	-	932	1	1810010D01Rik|Gm2572|-|7 F5|7|ncRNA	3.40132	3.39709	3.39888	3.39893	3.39709	-0.197793	0.758787	1
NM_008442	chr13	106960585	107022114	-	4184	1	Kif2a|C530030B14Rik|Kif2|Kns2|M-kinesin|-|13|13 D2.1|protein-coding	10.8836	10.8759	10.8747	10.9019	10.8808	0.0155068	0.778258	0.999671
NM_011440	chr9	99874106	99876170	-	2062	1	Sox14|-|-|9 E3.3|9 52.11 cM|protein-coding	0	0	0	0	0	NA	1	1
NR_045175	chr4	52430284	52438964	-	624	1	Smc2os|2700081L22Rik|-|4|4 B2|ncRNA	2.58952	2.59281	2.59009	2.58927	2.58963	-0.543672	0.513153	1
NM_146590	chr2	86657515	86658456	-	940	1	Olfr1085|MOR191-1|-|2|2 D|protein-coding	0	0	0	0	0	NA	1	1
NM_011228	chrX	48519285	48530240	+	1162	1	Rab33a|Rabs10|-|X 25.68 cM|X A5|protein-coding	1.3363	1.33422	1.3345	1.33369	1.33508	-0.72507	0.576977	1
NR_106137	chr15	78348599	78348660	+	61	2	Mir7676-1|Gm27600|mmu-mir-7676-1|-|15|15 E1|ncRNA	0	0	0	0	0	NA	1	1
NM_172783	chrX	160502434	160591722	+	4679	1	Phka2|6330505C01Rik|D330034O08|Phk|-|X F4|X 73.95 cM|protein-coding	10.0755	10.0736	10.0442	10.0534	10.0526	-0.0871254	0.20015	0.999671
NM_028031	chr7	48789003	48827437	+	2388	1	Zdhhc13|2410004E01Rik|C530010M18|HIP3RP|Hip14l|kojak|skc4|-|7|7 B4|protein-coding	10.3104	10.3282	10.2803	10.2825	10.3028	-0.0984622	0.128119	0.973721
NM_145462	chr14	54541785	54554361	-	1575	1	Haus4|9430093H08Rik|AU016300|D14Ertd500e|-|14 C2|14 27.83 cM|protein-coding	10.6462	10.6976	10.6874	10.6808	10.6722	0.0247787	0.684127	0.999671
NM_001166741	chr7	21097569	21098513	-	943	1	Vmn1r121|EG667240|Gm8533|-|7|7 A3|protein-coding	0	0	0	0	0	NA	1	1
NM_175087	chr15	99601400	99605477	+	2053	1	Aqp6|AI790337|-|15 F1|15 56.13 cM|protein-coding	0	0	0	0	0	NA	1	1
NR_029537	chr4	101346945	101347027	-	82	1	Mir101a|Mirn101|Mirn101a|miR-101|mir-101a|-|4|4 C6|ncRNA	0	0	0	0	0	NA	1	1
NM_053215	chr5	87240492	87254788	-	1871	1	Ugt2b37|0610033E06Rik|-|5|5 E1|protein-coding	0	0	0	0	0	NA	1	1
NM_001029929	chr11	70459622	70466199	+	2785	1	Zmynd15|-|-|11|11 B3|protein-coding	1.22453	1.22581	1.22582	1.22508	1.22587	0.44985	0.745632	1
NM_018816	chr17	35128997	35131752	-	707	1	Apom|1190010O19Rik|G3a|NG20|-|17|17 B1|protein-coding	3.65681	3.65988	3.65957	3.66061	3.65962	0.305085	0.607722	1
NM_001102678	chrX	27924020	27946916	-	910	12	Gm10096|ENSMUSG00000061227|Xmr-like|-|X A3.1|X|protein-coding	-0.0917236	-0.0922496	-0.091901	-0.0911684	-0.0917039	1.00504	0.653986	1
NM_145531	chr2	122053526	122118386	-	7623	1	Spg11|6030465E24Rik|A330015I11|C530005A01Rik|-|2|2 E5|protein-coding	11.1606	11.1319	11.1818	11.1664	11.1804	0.0712257	0.167216	0.990926
NM_029528	chr6	42315305	42324640	-	4099	1	Fam131b|6330503C03Rik|6530406I18Rik|AV277466|-|6 B2.1|6|protein-coding	1.02259	1.0219	1.02039	1.02183	1.02001	-1.60171	0.278145	1
NM_025509	chr3	130695917	130709444	-	1056	1	Ostc|2310008M10Rik|5730557H03Rik|-|3|3 G3|protein-coding	11.8669	11.8706	11.85	11.8848	11.8745	0.00187133	0.965899	0.999671
NM_008168	chr7	25009851	25072369	-	3816	1	Grik5|GluK5|GluRgamma2|KA2|-|7 A3|7 13.73 cM|protein-coding	5.15843	5.15723	5.14797	5.15428	5.15347	-0.378374	0.274281	1
NM_175688	chr13	19727417	19732951	-	2769	1	A530099J19Rik|-|-|13|13 A2|protein-coding	0	0	0	0	0	NA	1	1
NM_080844	chr1	160978606	161003014	+	2151	1	Serpinc1|AI114908|ATIII|At-3|At3|-|1 H2.1|1 69.75 cM|protein-coding	4.20401	4.20173	4.1998	4.20253	4.20506	-0.0536208	0.912527	1
NM_025622	chr15	78850860	78855529	-	586	1	Lgals2|2200008F12Rik|AI324147|-|15|15 E1|protein-coding	6.01612	6.01099	6.00649	5.99944	6.00692	-0.334549	0.196532	1
NR_106103	chr1	171064591	171064652	-	61	1	Mir6546|Gm27408|mmu-mir-6546|-|1|1 H3|ncRNA	0	0	0	0	0	NA	1	1
NM_025846	chr7	114046782	114117781	-	2267	1	Rras2|2610016H24Rik|C86394|TC21|-|7|7 F1|protein-coding	12.9091	12.9224	12.8657	12.9055	12.8946	-0.0462531	0.209062	0.999671
NM_033590	chr18	37714834	37841872	+	4653	1	Pcdhga7|-|-|18|18 B3|protein-coding	11.163	11.1372	11.178	11.1941	11.2078	0.102895	0.0486204	0.769577
NM_010630	chr15	76660641	76668196	+	3123	1	Kifc2|-|-|15 D3|15 36.23 cM|protein-coding	4.70534	4.70963	4.70835	4.70856	4.71287	0.2252	0.5872	1
NM_001166033	chr2	28822300	28840360	-	7118	1	Gtf3c4|5330400C03|AI426938|AU014771|AU017413|KAT12|TFIIIC90|-|2|2 A3|protein-coding	11.877	11.876	11.8773	11.8714	11.9084	0.0185222	0.673536	0.999671
NM_011522	chr17	24685092	24689949	-	1953	1	Syngr3|-|-|17|17 A3.3|protein-coding	2.32643	2.33007	2.32784	2.32688	2.32783	-0.322244	0.727252	1
NR_110469	chr6	31165523	31218474	-	1710	1	Lncpint|Lincpint|MNCb-1768|Pint|linc-Pint|-|6|6 A3.3|ncRNA	6.74702	6.74828	6.75178	6.75002	6.74664	0.042528	0.832926	1
NR_106021	chr7	45012426	45012487	-	61	1	Mir7054|Gm27557|mmu-mir-7054|-|7|7 B3|ncRNA	1.43539	1.43397	1.43422	1.43463	1.43482	-0.112131	0.928656	1
NM_172161	chr6	113638467	113695027	+	3182	1	Irak2|6330415L08Rik|AI649099|IRAK-2|-|6 E3|6 52.82 cM|protein-coding	9.9835	9.96832	9.92226	9.91853	9.94823	-0.172226	0.01691	0.5531
NM_001080711	chr2	76650273	76658554	+	1209	1	Dfnb59|Gm1001|Pjvk|-|2|2 C3|protein-coding	-1.86732	-1.86725	-1.86736	-1.86702	-1.86731	0.479068	0.916367	1
NM_025522	chr12	72650353	72664828	-	1295	1	Dhrs7|2310016E22Rik|5730564L20Rik|AW061210|Retdsr4|Retsdr4|-|12|12 C3|protein-coding	9.59746	9.60434	9.65816	9.64353	9.60359	0.151674	0.0747116	0.869976
NM_001347161	chr2	68861441	69114283	+	7050	1	Cers6|4732462C07Rik|AW544719|Lass6|T1L|-|2|2 C2|protein-coding	11.9499	11.9373	11.9315	11.9213	11.9336	-0.0301677	0.470752	0.999671
NM_028006	chr10	39134023	39151058	+	2915	1	Tube1|2310061K05Rik|AI551343|Tube|-|10|10 B1|protein-coding	8.39475	8.40003	8.42234	8.41436	8.39927	0.1222	0.301316	0.999671
NM_001166848	chr7	23217332	23218255	+	922	5	Vmn1r130|Gm4542|-|7 A3|7|protein-coding	-1.86732	-1.86725	-1.86736	-1.86702	-1.86731	0.479068	0.916367	1
NM_013898	chrX	134537256	134541670	+	1217	2	Timm8a1|DXHXS1274E|Ddp1|Fci-12|Tim8a|Timm8a|-|X E3|X 56.18 cM|protein-coding	9.84072	9.85044	9.87238	9.86952	9.86654	0.0942419	0.19527	0.999671
NM_029946	chr15	83866712	84065349	-	4978	1	Efcab6|4931407K02Rik|4932408N08Rik|bM150J22.2|mKIAA1672|-|15|15 E1-E2|protein-coding	0	0	0	0	0	NA	1	1
NR_035503	chr10	80828797	80828870	+	73	1	Mir1982|mir-1982|mmu-mir-1982|-|10 C1|10 39.72 cM|ncRNA	6.17583	6.17734	6.17752	6.16444	6.1773	-0.113963	0.650584	1
NR_037252	chr2	10503273	10503355	+	82	3	Mir467a-3|Mirn467a-3|mmu-mir-467a-3|-|2 A1|2|ncRNA	0	0	0	0	0	NA	1	1
NM_028381	chr17	55959187	55967951	+	1303	1	Ccdc94|2900016D05Rik|AI413813|-|17|17 D|protein-coding	9.12181	9.13007	9.1702	9.15045	9.14218	0.158723	0.0895164	0.897751
NM_013459	chr10	79890853	79892655	+	915	1	Cfd|Adn|DF|-|10 C1|10 39.72 cM|protein-coding	0.883763	0.882091	0.883297	0.883652	0.882546	0.295794	0.853122	1
NM_007891	chr2	154559400	154569892	-	2730	1	E2f1|E2F-1|mKIAA4009|-|2 H1|2 76.79 cM|protein-coding	10.9852	10.9853	10.9859	10.8903	10.9425	-0.114836	0.0757656	0.869976
NM_144874	chr19	43733254	43753000	-	4787	1	Cox15|2900026G05Rik|-|19|19 C3|protein-coding	10.7751	10.804	10.7695	10.7947	10.799	-0.00440372	0.939279	0.999671
NR_030700	chr5	25499797	25504473	+	4676	1	4831440E17Rik|-|-|5|5 B1|ncRNA	5.03826	5.03735	5.04296	5.03564	5.03892	0.0994763	0.787318	1
NM_001174078	chr9	21616169	21704230	+	6340	1	Smarca4|Brg1|HP1-BP72|SNF2beta|SW1/SNF|b2b508.1Clo|b2b692Clo|-|9 A3|9 7.84 cM|protein-coding	13.1479	13.1037	13.1215	13.1103	13.1582	0.00602671	0.875629	0.999671
NM_145526	chr2	84996552	85035834	-	4176	1	P2rx3|4930513E20Rik|P2X3|-|2|2 D|protein-coding	3.56609	3.56316	3.5607	3.56299	3.56185	-0.523194	0.37878	1
NM_025316	chr3	32737063	32751559	+	991	1	Ndufb5|0610007D05Rik|AU015782|CI-SGDH|SGDH|-|3|3 A3|protein-coding	11.7144	11.7088	11.7017	11.739	11.7034	0.00648898	0.887606	0.999671
NM_001347558	chr7	142119615	142120900	-	1283	1	Gm45618|-|-|7 F5|7|protein-coding	-1.262	-1.26188	-1.26206	-1.26148	-1.26145	1.47959	0.649349	1
NM_080641	chr2	180774381	180776900	-	2517	1	Bhlhe23|A930001L02Rik|BETA4|Beta3b|Bhlhb4|-|2 H4|2 103.34 cM|protein-coding	0	0	0	0	0	NA	1	1
NM_001039228	chr5	112353773	112356033	-	2258	1	Gm6583|EG625424|-|5 F|5|protein-coding	4.09951	4.09351	4.10077	4.10051	4.09861	0.488473	0.359767	1
NR_138576	chr1	138876272	138876950	-	408	1	1700019P21Rik|-|-|1|1 E4|ncRNA	0	0	0	0	0	NA	1	1
NM_007678	chr7	35119293	35121931	+	2636	1	Cebpa|C/ebpalpha|CBF-A|Cebp|-|7 B2|7 21.02 cM|protein-coding	0	0	0	0	0	NA	1	1
NM_021311	chr5	128736246	128755474	+	3920	1	Piwil1|MIWI|-|5 G1.3|5 67.86 cM|protein-coding	-1.26137	-1.26179	-1.26196	-1.26139	-1.2619	-0.887108	0.787664	1
NM_007825	chr3	18071950	18243338	-	2158	1	Cyp7b1|AW261589|D3Ertd552e|hct-1|-|3 A1|3 4.98 cM|protein-coding	-1.86732	-1.86725	-1.86736	-1.86702	-1.86731	0.479068	0.916367	1
NM_001134802	chr15	77698889	77719288	+	2220	1	Apol7e|ENSMUSG00000071716|-|15|15 E1|protein-coding	3.4807	3.48278	3.48458	3.48027	3.48284	0.177783	0.779399	1
NM_010167	chr10	23102962	23349943	-	5324	1	Eya4|B130023L16Rik|-|10 A3|10 10.44 cM|protein-coding	1.13167	1.13101	1.13052	1.12905	1.13043	-1.3119	0.350336	1
NM_011291	chr1	16101296	16104433	-	924	1	Rpl7|Rpl7a|Surf-3|-|1|1 A3|protein-coding	16.3937	16.425	16.3784	16.4215	16.3894	-0.0184242	0.542018	0.999671
NM_010446	chr2	148042877	148046969	-	2123	1	Foxa2|HNF3-beta|HNF3beta|Hnf-3b|Hnf3b|Tcf-3b|Tcf3b|-|2 G3|2 73.38 cM|protein-coding	0	0	0	0	0	NA	1	1
NR_003596	chr5	10865029	10870808	+	1067	1	Gm6455|EG623849|-|5|5 A1|pseudo	0	0	0	0	0	NA	1	1
NM_172870	chr4	84272542	84675086	-	6445	1	Bnc2|5031434M05Rik|8430420F16Rik|-|4|4 C4|protein-coding	0.295181	0.294082	0.295869	0.294523	0.293965	0.29898	0.883431	1
NM_001085493	chr4	11051046	11076205	-	1071	1	Ndufaf6|2310030N02Rik|-|4|4 A1|protein-coding	9.23242	9.22635	9.19249	9.20399	9.19456	-0.169785	0.0546487	0.798587
NM_025440	chr14	20391231	20393555	-	561	1	Mrps16|1500011E11Rik|Mprs16|-|14|14 A3|protein-coding	10.3383	10.3476	10.337	10.3349	10.3643	0.008093	0.900098	0.999671
NM_144551	chr12	15791727	15816785	-	4193	1	Trib2|AW319517|TRB-2|TRB2|-|12|12 A1.1|protein-coding	1.87691	1.87623	1.87683	1.87677	1.8802	0.955424	0.42014	1
NR_037998	chr1	16657552	16662278	+	2784	1	D030040B21Rik|D030040B21|-|1|1 A3|ncRNA	2.92341	2.92346	2.92078	2.92181	2.92359	-0.406062	0.584374	1
NM_010073	chr2	32570858	32573571	+	855	1	Dpm2|AW557993|R75484|-|2|2 B|protein-coding	9.25497	9.24361	9.26462	9.25998	9.26688	0.0745711	0.397031	0.999671
NM_175162	chr8	47180048	47352348	-	9309	1	Stox2|4933409N07Rik|AI449080|AI835114|mKIAA1392|-|8|8 B1.1|protein-coding	-1.31137	-1.31127	-1.31098	-1.3109	-1.31137	1.30074	0.705003	1
NR_045749	chr3	89998760	90001325	+	636	1	Gm19710|-|-|3 F1|3 39.19 cM|ncRNA	4.31958	4.31911	4.31734	4.31868	4.32129	-0.0297236	0.948994	1
NM_008676	chr11	101552654	101581951	+	4628	1	Nbr1|mKIAA0049|-|11 D|11 65.36 cM|protein-coding	12.3725	12.3715	12.3312	12.3199	12.3343	-0.0807191	0.0348791	0.722714
NM_001011839	chr19	12321887	12322825	-	937	1	Olfr1437|MOR214-6|-|19|19 A|protein-coding	0	0	0	0	0	NA	1	1
NM_001039493	chr1	64789121	64956824	-	8552	1	Plekhm3|9430067K14Rik|A230102O09Rik|AI449570|DAPR|Plekhm1l|-|1|1 C2|protein-coding	9.84323	9.83088	9.85546	9.83634	9.86825	0.063353	0.399314	0.999671
NM_001347499	chr8	28646717	29219636	-	9147	1	Unc5d|D930029E11Rik|Unc5h4|mKIAA1777|-|8|8 A2|protein-coding	4.68127	4.6838	4.6823	4.68559	4.67727	-0.0718391	0.863892	1
NM_001030293	chrX_GL456233_random	101352	106392	-	4342	1	Spry3|Gm1409|Gm391|sprouty3|-|-|protein-coding	-1.86732	-1.86725	-1.86736	-1.86702	-1.86731	0.479068	0.916367	1
NM_028955	chr7	120982509	121014787	+	1873	1	Mfsd13b|4933427G17Rik|-|7|7 F2|protein-coding	2.88567	2.88742	2.88718	2.88785	2.88839	0.416773	0.592739	1
NM_145510	chr1	134494660	134507884	+	1955	1	Rabif|AI842864|AW549708|E130318E12Rik|MSS4|RASGFR3|-|1|1 E4|protein-coding	10.6269	10.6689	10.6612	10.6743	10.6899	0.0783323	0.198087	0.999671
NM_146889	chr2	111780313	111781260	+	946	1	Olfr1302|MOR248-3|-|2|2 E3|protein-coding	0	0	0	0	0	NA	1	1
NM_001301341	chr13	58391132	58403343	-	2960	1	Hnrnpk|Hnrpk|KBBP|NOVA|-|13|13 B1|protein-coding	15.1474	15.1568	15.1651	15.1567	15.1388	0.00228733	0.935601	0.999671
NM_010932	chr14	65400673	65425472	-	2151	1	Pnoc|N/OFQ|Npnc1|OFQ/N|-|14|14 D1|protein-coding	1.95595	1.95357	1.95383	1.95326	1.95347	-0.701118	0.498588	1
NM_009265	chr3	92436809	92438779	-	816	1	Sprr1b|-|-|3 F1|3 40.14 cM|protein-coding	0	0	0	0	0	NA	1	1
NM_025788	chr8	84670479	84687862	-	4296	1	Nacc1|2010001H03Rik|4930511N13Rik|Btbd14b|Nac1|-|8 C2|8 41.02 cM|protein-coding	12.2845	12.265	12.2784	12.2983	12.3172	0.0427111	0.296621	0.999671
NM_020587	chr4	131873639	131901725	+	2246	1	Srsf4|5730499P16Rik|AW550192|MNCb-2616|SRp75|Sfrs4|-|4|4 D2.3|protein-coding	10.3782	10.4037	10.3861	10.3739	10.4336	0.0226809	0.741863	0.999671
NR_037208	chrX	140310948	140311012	+	64	1	Mir3475|mir-3475|mmu-mir-3475|-|X F1|X 61.35 cM|ncRNA	0	0	0	0	0	NA	1	1
NM_017474	chr3	145004537	145032776	-	2919	1	Clca1|Clca2|Clca3|gob-5|gob5|-|3 H2|3 69.26 cM|protein-coding	0.136281	0.135775	0.1366	0.13683	0.136302	1.28568	0.547061	1
NM_001025372	chr6	55451978	55501455	+	6143	1	Adcyap1r1|2900024I10Rik|AI846590|PAC1|PAC1R|PACAP1-R|-|6|6 B3|protein-coding	1.16132	1.1613	1.15975	1.1612	1.16072	-0.740861	0.583509	1
NM_007814	chr7	26757142	26772630	+	2729	1	Cyp2b19|CYPIIB19|-|7 A3|7 15.44 cM|protein-coding	0	0	0	0	0	NA	1	1
NM_001081205	chr5	72647796	72671078	+	4197	1	Nipal1|3830408G10Rik|Npal1|-|5|5 C3.2|protein-coding	7.12551	7.11492	7.12898	7.1146	7.12704	0.0590171	0.746646	1
NM_029406	chr7	45154303	45160064	+	1184	1	Pih1d1|1110061L23Rik|4933413A04Rik|Nop17|-|7|7 B3|protein-coding	11.2611	11.2885	11.2675	11.277	11.2751	-0.0029772	0.952127	0.999671
NM_172866	chr4	43578735	43587487	+	5857	1	Rgp1|1110029E03Rik|AI527196|F730001J03|mKIAA0258|-|4|4 A5|protein-coding	10.8619	10.8658	10.9254	10.9167	10.9406	0.168175	0.00210298	0.174155
NR_105762	chr1	82131916	82132019	+	103	1	Mir6344|Gm27840|mmu-mir-6344|-|1|1 C5|ncRNA	0	0	0	0	0	NA	1	1
NR_033136	chr7	44812256	44816658	-	1813	1	Atf5|AFTA|Atf7|Atfx|ODA-10|-|7|7 B3|protein-coding	12.4787	12.5274	12.4605	12.4663	12.4842	-0.0587652	0.147352	0.978461
NM_026406	chr3	96727611	96791155	+	2254	1	Rnf115|2610028E05Rik|AU042696|Zfp364|-|3|3 F2.1|protein-coding	10.8357	10.8448	10.8728	10.8594	10.8383	0.0455192	0.417464	0.999671
NM_016811	chr10	128720136	128744056	-	2787	1	Dgka|80kDa|AW146112|Dagk1|-|10 D3|10 77.14 cM|protein-coding	7.53587	7.52308	7.53437	7.52778	7.54169	0.0698294	0.658776	1
NM_178710	chr9	50892801	51009073	-	3534	1	Sik2|G630080D20Rik|Snf1lk2|-|9|9 A5.3|protein-coding	10.2251	10.1922	10.2193	10.221	10.2447	0.0638221	0.350728	0.999671
NR_131050	chr5	77465488	77468857	+	562	1	1700017L05Rik|-|-|5|5 C3.3|ncRNA	0	0	0	0	0	NA	1	1
NM_011500	chr17	78653964	78736560	-	3922	1	Strn|AU022939|D130055P19|-|17|17 E3|protein-coding	10.918	10.9119	10.9329	10.9358	10.9339	0.049724	0.351282	0.999671
NM_001177568	chr2	177464742	177479194	+	4658	1	Zfp970|Gm14420|OTTMUSG00000016588|-|2|2 H4|protein-coding	12.7939	12.7575	12.7981	12.785	12.785	0.0227706	0.538516	0.999671
NM_019408	chr19	46305695	46312090	+	3181	1	Nfkb2|NF-kappaB2|lyt|p49|p49/p100|p50B|p52|-|19 C3|19 38.8 cM|protein-coding	10.6852	10.6674	10.7246	10.6881	10.7207	0.0975131	0.102347	0.928572
NR_073583	chr18	42645221	42899506	-	2522	1	Ppp2r2b|2900026H06Rik|6330404L05Rik|E130009M08Rik|PP2A-PR55B|PR55-BETA|SCA12|-|18|18 B3|protein-coding	-1.86699	-1.86725	-1.86737	-1.86733	-1.86732	-1.83967	0.683538	1
NM_007943	chr4	109280275	109387816	+	5155	1	Eps15|2410112D09Rik|-|4|4 C7|protein-coding	12	11.9958	12.0231	12.0336	12.0313	0.0617544	0.132047	0.973721
NM_028677	chr4	119300010	119320523	-	765	1	Ppih|1100001J08Rik|2010111B15Rik|4833408F11Rik|AI464484|CYP-20|CYPH|D4Wsu43e|-|4 D2.1|4 55.34 cM|protein-coding	10.0905	10.0875	10.1029	10.1099	10.0938	0.0465616	0.493023	0.999671
NM_029983	chr2	156872922	156887078	-	2498	1	Sla2|A930009E21Rik|AI430952|SLAP-2|SLAP2|-|2|2 H1|protein-coding	10.9167	10.978	10.9418	10.9622	10.9392	0.00200747	0.972649	0.999671
NM_001033164	chr16	18836580	18840113	+	1227	1	2510002D24Rik|2410043I01Rik|AA163535|AA409624|DXMgi27|-|16|16 A3|protein-coding	8.53584	8.51826	8.51046	8.54179	8.53486	0.013999	0.904672	0.999671
NM_013783	chr4	154869585	154895530	+	2911	1	Mmel1|Mell1|NEP2|NEPII|Nl1|SEP|-|4|4 E2|protein-coding	-1.8673	-1.86725	-1.86709	-1.86731	-1.8673	0.479068	0.916367	1
NR_046279	chr7	133128251	133142457	+	1027	1	4930483O08Rik|-|-|7|7 F3|ncRNA	-0.121298	-0.122446	-0.121589	-0.122557	-0.121901	-0.350885	0.875175	1
NR_029725	chr13	48538179	48538272	-	93	1	Mirlet7a-1|Let-7a|Mirnlet7a|Mirnlet7a-1|let-7a-1|-|13|13 A5|ncRNA	3.81796	3.82093	3.8182	3.82287	3.81758	0.0183791	0.973993	1
NM_029100	chr4	134537892	134552166	-	3431	1	Selenon|1110019I12Rik|AI414492|SelN|Sepn1|-|4|4 D3|protein-coding	11.2132	11.2026	11.1911	11.2316	11.2119	0.00804115	0.876465	0.999671
NM_001289727	chrX	38196573	38252481	-	1785	1	Tmem255a|4933417N17|6430550H21Rik|Fam70a|-|X|X A3.3|protein-coding	5.69064	5.68178	5.68273	5.68344	5.6855	-0.108318	0.710798	1
NR_046074	chr7	12221316	12225807	+	1591	1	Gm4224|-|-|7 A1|7|ncRNA	0	0	0	0	0	NA	1	1
NR_105807	chr9	53400805	53400886	-	81	1	Mir130c|Gm27641|mmu-mir-130c|-|9|9 A5.3|ncRNA	6.13889	6.13758	6.14577	6.14652	6.14457	0.257024	0.305319	1
NM_008158	chr6	99692679	99693818	+	1138	1	Gpr27|-|-|6|6 D3|protein-coding	0	0	0	0	0	NA	1	1
NM_001081291	chr19	6844623	6858211	-	4930	1	Ccdc88b|2610041P08Rik|Ccdc88|-|19|19 A|protein-coding	2.77873	2.77706	2.77825	2.77958	2.77373	-0.231984	0.785607	1
NM_011804	chr1	165763780	165775304	+	2119	1	Creg1|AA755314|Creg|-|1|1 H2.3|protein-coding	11.9443	11.9674	12.035	11.9959	11.9993	0.109235	0.0129473	0.4829
NM_001170433	chr6	146888494	147032023	+	4845	1	Ppfibp1|4632409B19Rik|AW214454|AW261454|-|6|6 G3|protein-coding	14.0041	13.9824	14.0161	13.9899	13.9937	0.0101573	0.747027	0.999671
NM_139307	chr16	4639945	4651166	+	3185	1	Vasn|2610528G05Rik|Atia|Slitl2|-|16|16 A1|protein-coding	11.7075	11.6849	11.6291	11.683	11.6834	-0.066332	0.177867	0.998189
NM_029952	chr17	33239507	33255145	-	3749	1	Zfp955a|AI842447|Zfp883a|-|17|17 B1|protein-coding	10.8913	10.8995	10.9231	10.9235	10.8827	0.0388643	0.492551	0.999671
NM_011430	chr14	34370274	34374669	-	725	1	Sncg|C79089|persyn|-|14 B|14 20.81 cM|protein-coding	9.64025	9.64974	9.62371	9.65126	9.63742	-0.0319625	0.686282	0.999671
NM_001166840	chr7	20441670	20442593	-	922	2	Vmn1r149|Gm4194|-|7 A3|7|protein-coding	0	0	0	0	0	NA	1	1
NM_001037755	chr11	119943092	120006782	+	2049	1	Baiap2|IRSp53|R75030|-|11|11 E2|protein-coding	12.3137	12.3023	12.2439	12.2393	12.2678	-0.108551	0.00632335	0.34332
NM_001001152	chr13	67254918	67269068	-	3482	1	Zfp458|BC062958|Rslcan-7|Znf728|mszf59-2|-|13 B3|13 34.54 cM|protein-coding	7.38984	7.39021	7.36925	7.38282	7.38722	-0.153884	0.349966	1
NM_001024136	chr4	47015689	47057306	-	3535	1	Anks6|2210417J20Rik|Ankrd14|Gm635|SamCystin|Samd6|b2b1801.1Clo|-|4|4 B1|protein-coding	1.87605	1.87722	1.87478	1.87525	1.87613	-0.739322	0.481407	1
NM_001114088	chr13	55497487	55513446	-	2611	1	Pdlim7|LMP|-|13|13 B1|protein-coding	11.6217	11.5884	11.5749	11.6065	11.6366	0.000932687	0.985319	0.999671
NM_001308498	chr11	107157408	107167125	+	665	1	Gm11715|OTTMUSG00000003631|-|11 E1|11 70.19 cM|protein-coding	8.10306	8.12469	8.08096	8.08021	8.08968	-0.289339	0.0256336	0.660927
NM_134241	chr13	22883088	22884161	-	1072	1	Vmn1r212|V1rh18|-|13|13 A3.1|protein-coding	0	0	0	0	0	NA	1	1
NM_001291211	chr2	181837854	181857460	+	3563	1	Pcmtd2|5330414D10Rik|AI314201|-|2|2 H4|protein-coding	10.2029	10.2332	10.2266	10.2306	10.2145	0.0210206	0.753105	0.999671
NM_139221	chr8	21905374	21906432	-	335	1	Defb11|BD-11|Defb8|-|8|8 A2|protein-coding	0	0	0	0	0	NA	1	1
NM_008994	chr3	5560188	5576248	-	2205	1	Pex2|D3Ertd138e|PAF-1|PMP35|Pxmp3|-|3 A1|3 1.96 cM|protein-coding	11.223	11.232	11.2078	11.2238	11.2075	-0.0339177	0.495397	0.999671
NM_001001559	chr7	103250086	103252505	-	1635	1	Usp17ld|Dub2a|Dub4|-|7|7 E3|protein-coding	0	0	0	0	0	NA	1	1
NM_007702	chr18	67343564	67367794	+	1157	1	Cidea|AW212747|-|18|18 E1|protein-coding	-1.8673	-1.86725	-1.86709	-1.86731	-1.8673	0.479068	0.916367	1
NM_001277149	chr4	8690406	8868449	+	11266	1	Chd7|A730019I05Rik|Cycn|Cyn|Dz|Edy|Flo|GENA 47|GENA 60|Gena 52|Lda|Mt|Obt|Todo|WBE1|Whi|metis|-|4 A1|4 3.68 cM|protein-coding	10.2097	10.1734	10.2144	10.2036	10.2005	0.047472	0.485535	0.999671
NM_172488	chr14	77024201	77036617	-	2409	1	Lacc1|9030625A04Rik|-|14|14 D3|protein-coding	9.69264	9.70565	9.6696	9.68425	9.68221	-0.0850709	0.268657	0.999671
NM_145539	chr3	57425410	57441675	+	1391	1	Tm4sf4|Iltmp|-|3|3 D|protein-coding	1.58081	1.58236	1.58142	1.58071	1.58218	-0.108887	0.927095	1
NM_001033789	chr18	38892456	38971274	+	2180	1	Gm5820|EG545253|-|18 B3|18|protein-coding	0	0	0	0	0	NA	1	1
NM_026660	chr5	34633647	34637114	-	1812	1	Mfsd10|0610009O03Rik|Tetran|-|5|5 B2|protein-coding	10.6934	10.6778	10.6671	10.6812	10.6843	-0.023816	0.679476	0.999671
NR_110510	chr8	25548673	25556083	-	930	1	Gm16159|OTTMUSG00000031030|-|8 A2|8 14.17 cM|ncRNA	5.97614	5.98275	5.97665	5.97646	5.97926	-0.0735376	0.779097	1
NM_001168660	chr15	77729121	77736382	+	1541	1	Apol9b|2310016F22Rik|-|15|15 E1|protein-coding	8.48237	8.48352	8.49102	8.49137	8.48889	0.0589127	0.599561	0.999671
NM_009344	chr10	111506286	111508649	+	1949	1	Phlda1|DT1P1B11|TDAG51|Tdag|-|10|10 D1|protein-coding	9.16163	9.15063	9.11788	9.11786	9.10363	-0.233473	0.0103624	0.429075
NM_028276	chrX	48256934	48282449	+	2414	1	Utp14a|2700066J21Rik|JsdX|NY-CO-16|SDCCAG16|T25628|mKIAA0266|-|X|X A5|protein-coding	11.3408	11.3437	11.3888	11.3936	11.4094	0.125995	0.00890098	0.41223
NM_207548	chr7	23753911	23754852	+	940	1	Vmn1r174|V1rd22|-|7|7 A3|protein-coding	0	0	0	0	0	NA	1	1
NM_001085522	chr4	146449030	146469440	+	3685	1	Zfp992|Gm13251|OTTMUSG00000011097|-|4|4 E1|protein-coding	8.4732	8.46532	8.46057	8.47201	8.47135	-0.0111696	0.921651	0.999671
NM_023402	chr17	70973963	70990516	-	933	1	Myl12b|1500001M02Rik|C77744|Mylc2b|RLC-B|-|17|17 E1.3|protein-coding	12.0252	12.0515	12.0529	12.0577	12.0254	0.0148475	0.728721	0.999671
NM_028459	chr6	24613810	24664995	-	4320	1	Wasl|2900021I12Rik|3110031I02Rik|N-WASP|-|6|6 A3.1|protein-coding	10.6181	10.6477	10.6701	10.6489	10.6579	0.0759843	0.200179	0.999671
NR_029469	chr4	118626404	118631915	+	802	1	D4Ertd617e|-|-|4 D2.1|4 54.97 cM|ncRNA	6.6975	6.68449	6.68981	6.68707	6.682	-0.111527	0.593186	1
NM_001122603	chr7	28071236	28120864	+	7908	1	Fcgbp|A430096B05Rik|-|7|7 A3|protein-coding	-0.188323	-0.189459	-0.188109	-0.189561	-0.189542	-0.453837	0.851228	1
NM_001252250	chr11	4765845	4849544	-	4754	1	Nf2|merlin|-|11 A1|11 3.0 cM|protein-coding	12.361	12.3716	12.3761	12.4005	12.4244	0.0629456	0.123547	0.973721
NM_007417	chr19	54045182	54048982	+	3798	1	Adra2a|AW122659|Adra-2|Adra-2a|alpha(2A)AR|alpha2-C10|alpha2A|alpha2A-AR|-|19 D2|19 49.04 cM|protein-coding	2.58659	2.58491	2.58714	2.59054	2.58733	1.14592	0.226232	1
NM_173862	chr15	57985903	58010702	+	2079	1	Fam83a|-|-|15|15 D1|protein-coding	1.25696	1.25909	1.25826	1.25751	1.25765	-0.195266	0.883478	1
NR_045867	chr6	148606786	148614309	-	2559	1	Gm6313|EG622319|-|6 G3|6|ncRNA	2.61842	2.6194	2.61781	2.61815	2.6192	-0.19155	0.816237	1
NM_001146081	chrX	164980592	164997272	+	2945	1	Fancb|BC022692|-|X|X F5|protein-coding	10.029	10.0357	10.0009	10.0516	10.0157	-0.0340552	0.64449	0.999671
NM_134000	chr10	39612934	39655307	+	2856	1	Traf3ip2|AI429613|Act1|CIKS|-|10|10 B1|protein-coding	9.5088	9.51858	9.51141	9.51766	9.53102	0.0291271	0.7211	0.999671
NM_010496	chr12	25093799	25096092	-	1267	1	Id2|AI255428|C78922|Idb2|bHLHb26|-|12 A1.3|12 8.57 cM|protein-coding	9.84702	9.79518	9.79486	9.84552	9.81522	-0.0120108	0.885764	0.999671
NM_146886	chr2	111645057	111645995	-	937	1	Olfr1298|MOR248-6|-|2|2 E3|protein-coding	0	0	0	0	0	NA	1	1
NR_131949	chr12	62687787	62688336	+	549	1	Spanxn4|1700047L15Rik|-|12|12 C1|ncRNA	0	0	0	0	0	NA	1	1
NM_146372	chr7	108645609	108646574	-	964	1	Olfr509|MOR267-14|-|7|7 E3|protein-coding	0	0	0	0	0	NA	1	1
NM_010697	chr19	46032601	46039621	-	2275	1	Ldb1|CLIM2|NLI|-|19 C3|19 38.75 cM|protein-coding	11.2906	11.287	11.2869	11.2819	11.2666	-0.0239332	0.625343	0.999671
NR_033454	chr18	47537735	47718636	+	1517	1	Gm5095|A730092B10|-|18 C|18|ncRNA	0	0	0	0	0	NA	1	1
NR_037256	chr2	10476342	10476423	+	81.9	8	Mir467a-5|Mirn467a-5|mmu-mir-467a-5|-|2 A1|2|ncRNA	1.06181	1.06095	1.06183	1.06048	1.06121	-0.22249	0.876047	1
NM_001320300	chr11	83440768	83463040	-	3518	1	Mmp28|D130023P12|-|11|11 C|protein-coding	8.4344	8.43516	8.44124	8.42684	8.45088	0.0395252	0.734814	0.999671
NM_144912	chr5	122325508	122354195	-	1580	1	Rad9b|A630082N15Rik|BC021784|-|5|5 F|protein-coding	5.59517	5.58858	5.60185	5.5966	5.59175	0.242995	0.436297	1
NR_029557	chr18	61647825	61647894	-	69	1	Mir145a|Mir145|Mirn145|mir-145a|mmu-mir-145|mmu-mir-145a|-|18 E1|18|ncRNA	1.42435	1.42502	1.42549	1.42486	1.42439	0.210393	0.868454	1
NR_037235	chr13	63301199	63301283	-	84	1	Mir3074-1|mmu-mir-3074-1|-|13 B3|13 32.8 cM|ncRNA	2.50974	2.50774	2.50685	2.50881	2.50859	-0.263667	0.76082	1
NM_033569	chr19	46761609	46878580	+	3320	1	Cnnm2|AU015877|AW048635|Acdp2|Clp2|-|19 C3|19 38.97 cM|protein-coding	8.85237	8.84993	8.89578	8.85778	8.88662	0.186668	0.0757208	0.869976
NM_152818	chr11	3703731	3863903	-	4081	1	Osbp2|1700095P05Rik|C630001G20Rik|Gm244|ORP-4|OSBPL1|-|11|11 A1|protein-coding	1.1946	1.19609	1.19419	1.19324	1.19598	-0.823573	0.555331	1
NM_021339	chr9	35452076	35507652	+	7193	1	Cdon|CDO|Cd0|Orcam|-|9|9 A4|protein-coding	12.6897	12.6595	12.6212	12.6243	12.6647	-0.0678149	0.0878436	0.894502
NM_178605	chr13	54584191	54590074	-	1727	1	Nop16|AA409471|D13Wsu177e|-|13 B1|13 28.83 cM|protein-coding	10.9114	10.9351	10.9797	10.9541	10.9669	0.114394	0.0359678	0.730288
NM_001177569	chrY	2599099	2599434	+	334	2	H2al2c|Gm6026|H2al2y|-|Y A1|Y|protein-coding	0	0	0	0	0	NA	1	1
NR_131058	chr9	32904069	32928966	-	3342	1	Gm27162|A430016B06|-|9|9 A4|ncRNA	-0.728148	-0.728659	-0.728809	-0.728185	-0.728131	0.0888286	0.973864	1
NR_028142	chr7	141455188	141460743	+	2707	1	Pnpla2|0610039C21Rik|1110001C14Rik|Atgl|TTS-2.2|-|7|7 F5|protein-coding	9.06337	9.0764	9.09417	9.10179	9.10913	0.18241	0.0520509	0.78586
NM_008740	chr11	103821783	103954056	-	3742	1	Nsf|AI316878|AU020090|AU067812|SKD2|-|11 E1|11 67.54 cM|protein-coding	12.0708	12.0683	12.0751	12.081	12.0795	0.0174379	0.665262	0.999671
NM_173755	chr11	116537753	116581447	-	5172	1	Ube2o|9630022H21|B230113M03Rik|E2-230K|mKIAA1734|-|11|11 E2|protein-coding	11.7317	11.7293	11.7531	11.6934	11.7608	0.0118586	0.812106	0.999671
NM_080635	chr15	51786563	51865461	-	1218	1	Eif3h|1110008A16Rik|40kD|9430017H16Rik|EIF3-P40|EIF3-gamma|Eif3s3|-|15|15 C|protein-coding	13.3289	13.3256	13.3302	13.3303	13.3404	0.0102902	0.750587	0.999671
NM_015753	chr2	44983512	45113279	-	9223	1	Zeb2|9130203F04Rik|D130016B08Rik|SIP1|Zfhx1b|Zfx1b|Zfxh1b|-|2|2 B|protein-coding	12.1842	12.1724	12.18	12.1702	12.1687	-0.0105084	0.791413	0.999671
NM_198621	chr5	25516067	25518027	+	1958	1	Cct8l1|Gm443|-|5|5 B1|protein-coding	-1.86732	-1.86725	-1.86737	-1.86734	-1.86698	0.479069	0.914707	1
NM_029098	chr15	98903921	98918098	-	2148	1	Lmbr1l|1110013E13Rik|AA415653|D15Ertd735e|Limr|-|15 F1|15 55.1 cM|protein-coding	8.33314	8.32984	8.33399	8.33769	8.31158	-0.0311364	0.798611	0.999671
NM_001293641	chr3	133310110	133378235	+	1366	1	Ppa2|1110013G13Rik|Sid6306|-|3|3 G3|protein-coding	11.2003	11.1977	11.1949	11.1953	11.2006	-0.0051427	0.917342	0.999671
NR_035426	chr8	39467448	40227787	-	73	1	Mir669e|Mirn669e|mmu-mir-669e|-|2 A1|2 8.22 cM|ncRNA	0	0	0	0	0	NA	1	1
NR_045149	chr6	139315597	139322576	-	1145	1	4922502N22Rik|-|-|6|6 G1|ncRNA	3.15193	3.14811	3.14552	3.15139	3.14698	-0.511734	0.478772	1
NM_053116	chr6	22288227	22298522	+	1660	1	Wnt16|E130309I19Rik|-|6|6 A3.1|protein-coding	1.09248	1.09309	1.09314	1.09239	1.09187	-0.326466	0.814785	1
NM_011931	chr1	159232326	159347580	+	5034	1	Rfwd2|AI316802|C80879|Cop1|-|1|1 H1|protein-coding	13.1243	13.1406	13.105	13.157	13.1231	-0.00644011	0.862077	0.999671
NM_147109	chr7	102973052	102973990	-	937	1	Olfr577|MOR7-2|-|7|7 E3|protein-coding	0	0	0	0	0	NA	1	1
NM_001177487	chr8	21249762	21250461	+	279	1	Gm15292|ENSMUSG00000074441|OTTMUSG00000019784|-|8 A2|8|protein-coding	0	0	0	0	0	NA	1	1
NR_037987	chr1	164148576	164152217	-	1238	1	Gm16548|-|-|1 H2.2|1 71.46 cM|ncRNA	2.6644	2.66709	2.66217	2.66537	2.66453	-0.596203	0.467844	1
NM_027706	chr12	13269127	13583811	+	7186	1	Nbas|4933425L03Rik|Nag|-|12|12 A1.1|protein-coding	11.7881	11.7371	11.7541	11.7119	11.7491	-0.0519024	0.286061	0.999671
NM_009014	chr12	79297282	79814690	+	1845	1	Rad51b|AI553500|R51H2|Rad51l1|mREC2|-|12|12 C3|protein-coding	8.4431	8.44034	8.46359	8.44893	8.43345	0.0568652	0.630118	0.999671
NM_177152	chr10	125966219	126015359	+	4029	1	Lrig3|9030421L11Rik|9130004I02Rik|9430095K15Rik|mKIAA3016|-|10|10 D3|protein-coding	9.49038	9.48094	9.53479	9.48325	9.50188	0.0981188	0.264013	0.999671
NR_040294	chr19	44972117	44984550	-	607	1	4930414N06Rik|-|-|19|19 C3|ncRNA	7.26713	7.25317	7.26803	7.25562	7.25892	0.010472	0.951874	1
NM_010729	chr9	58287723	58313212	-	3329	1	Loxl1|Loxl|-|9 B|9 31.65 cM|protein-coding	11.4916	11.4814	11.4627	11.4474	11.4788	-0.0527483	0.2664	0.999671
NM_145844	chr13	22101727	22102665	-	937	1	Vmn1r189|V1rh2|-|13|13 A3.1|protein-coding	0	0	0	0	0	NA	1	1
NR_038055	chr11	67112461	67120080	-	2719	1	2310065F04Rik|linc-Myh|-|11|11 B3|ncRNA	0	0	0	0	0	NA	1	1
NM_001017362	chr4	41723836	41731142	-	1741	1	Arid3c|OTTMUSG00000006683|-|4|4 A5|protein-coding	0.136281	0.135775	0.1366	0.13683	0.136302	1.28568	0.547061	1
NM_153793	chr18	37955559	37959179	+	1757	1	Rell2|4631403P03Rik|ependolin|-|18|18 B3|protein-coding	5.83825	5.84101	5.83815	5.84245	5.85189	0.191672	0.502141	1
NR_037302	chr7	143948405	144443433	-	104	1	Mir3470b|mmu-mir-3470b|-|16 B4|16 28.44 cM|ncRNA	-1.86732	-1.86725	-1.86737	-1.86734	-1.86698	0.479069	0.914707	1
NM_028803	chr16	70313949	70569720	+	2970	1	Gbe1|2310045H19Rik|2810426P10Rik|D16Ertd536e|-|16 C2|16 40.19 cM|protein-coding	9.54736	9.53335	9.57871	9.5858	9.56918	0.168342	0.0378898	0.738354
NM_001081176	chr13	81673837	81711013	-	3050	1	Polr3g|2310047G20Rik|AV275904|RPC32|RPC7|-|13|13 C3|protein-coding	10.2125	10.1878	10.2537	10.268	10.236	0.175112	0.0101642	0.426569
NM_133699	chr12	17284721	17324730	-	1551	1	Atp6v1c2|1110038G14Rik|-|12|12 A1.1|protein-coding	6.02806	6.02756	6.02301	6.02871	6.02564	-0.0739682	0.773608	1
NM_080419	chr1	172312367	172319843	+	2271	1	Igsf8|ESTM34|EWI-2|KCT-4|PGRL|-|1 H3|1 79.59 cM|protein-coding	11.2998	11.3115	11.3024	11.2895	11.3086	-0.012157	0.803442	0.999671
NR_040371	chr2	129297370	129307826	+	1776	1	Gm14023|OTTMUSG00000015408|-|2 F1|2 62.9 cM|ncRNA	2.96873	2.96779	2.96726	2.96838	2.97148	0.232611	0.760101	1
NM_015773	chr16	16753016	16829363	-	2453	1	Spag6l|PF16|Spag6|Spag6l1|-|16|16 A3|protein-coding	0	0	0	0	0	NA	1	1
NM_146425	chr7	107844787	107845731	-	943	1	Olfr470|MOR204-22|-|7|7 E3|protein-coding	0	0	0	0	0	NA	1	1
NR_105774	chr18	68739400	68739501	+	101	1	Mir6356|Gm27461|mmu-mir-6356|-|18|18 E2|ncRNA	0	0	0	0	0	NA	1	1
NM_001286557	chr19	3389378	3407823	+	2306	1	Mtl5|tesmin|-|19|19 A|protein-coding	1.03586	1.03482	1.036	1.03637	1.03653	1.24562	0.439851	1
NM_031381	chrX	140808307	140813433	-	2110	1	Tex13b|4933403J23Rik|Tex13|-|X|X F1|protein-coding	1.40109	1.4003	1.40108	1.40217	1.39987	0.304517	0.817462	1
NM_177918	chrX	135167624	135177632	-	3691	2	AV320801|4932408M16|-|X|X F1|protein-coding	0	0	0	0	0	NA	1	1
NM_177465	chr17	30954683	31010710	+	5019	1	Umodl1|D17Ertd488e|-|17 A3.3|17 15.8 cM|protein-coding	0	0	0	0	0	NA	1	1
NM_145828	chr11	94663847	94677493	-	3411	1	Xylt2|E030002B02Rik|XT-II|XT2|xylT-II|-|11|11 D|protein-coding	10.8467	10.8381	10.8564	10.8282	10.8398	-0.00232277	0.966722	0.999671
NM_080726	chr14	54476100	54480434	+	1880	1	Rem2|AW411893|-|14|14 C2|protein-coding	3.39938	3.39994	3.40163	3.40015	3.3983	0.0835001	0.896882	1
NM_001159617	chr16	94364452	94371015	-	900	1	Pigp|Dcrc|Dscr5|-|16|16 C4|protein-coding	9.59107	9.5778	9.58091	9.58117	9.57177	-0.0292326	0.712452	0.999671
NM_001244651	chr17	39640957	39645667	+	1164	1	Esp15|EG668200|Esp16|Gm9041|-|17|17 B1|protein-coding	0	0	0	0	0	NA	1	1
NM_001177965	chrX	73916870	73921944	-	1046	1	Naa10|2310039H09Rik|Ard1|Ard1a|Te2|-|X|X A7.3|protein-coding	11.0849	11.0776	11.0675	11.0843	11.0979	0.00419225	0.936188	0.999671
NM_178253	chr12	69241832	69283961	+	1934	1	Klhdc1|-|-|12|12 C2|protein-coding	7.95231	7.96357	7.94496	7.95433	7.94659	-0.0978158	0.467377	1
NM_001024614	chr5	98329304	98802019	+	853	1	1700007G11Rik|4930428O21Rik|-|5|5 E3|protein-coding	7.56699	7.56671	7.57895	7.572	7.55881	0.0427557	0.784539	1
NM_009868	chr8	104101625	104144502	+	3972	1	Cdh5|7B4|AA408225|Cd144|VE-Cad|VECD|VEcad|Vec|-|8 D3|8 53.04 cM|protein-coding	7.92573	7.93193	7.90759	7.90858	7.91951	-0.181647	0.18025	1
NM_001283011	chr13	100617164	100651061	-	2906	1	Rad17|MmRad24|-|13|13 D1|protein-coding	10.3707	10.4	10.3911	10.3943	10.3691	0.000112429	0.998606	0.999731
NM_173027	chr17	27143971	27167764	-	2297	1	Ip6k3|D830007E07Rik|Ihpk3|-|17|17 A3.3|protein-coding	3.25217	3.24746	3.25054	3.24926	3.25113	0.115701	0.867874	1
NM_172891	chr6	131299144	131313827	-	3367	1	Styk1|9130025L13|AI326477|Nok|-|6|6 F3|protein-coding	10.3913	10.3444	10.2652	10.3093	10.3317	-0.209511	0.00380933	0.249831
NM_010110	chrX	99136061	99149022	+	3351	1	Efnb1|Cek5-L|EFL-3|Elk-L|Epl2|Eplg2|LERK-2|Lerk2|Stra1|-|X C3|X 43.22 cM|protein-coding	11.408	11.421	11.3383	11.371	11.3496	-0.139141	0.00436264	0.26922
NM_001081228	chr2	75976172	75978179	-	2005	1	Ttc30a2|OTTMUSG00000015167|-|2|2 C3|protein-coding	0	0	0	0	0	NA	1	1
NR_033555	chr6	141340553	141344387	+	3834	1	Gm10400|ENSMUSG00000072690|-|6 G2|6|ncRNA	0	0	0	0	0	NA	1	1
NM_023380	chr16	75858794	75909266	-	1835	1	Samsn1|4930571B16Rik|930571B16Rik|Hacs1|SLy2|-|16|16 C3.1|protein-coding	-1.8673	-1.86725	-1.86709	-1.86731	-1.8673	0.479068	0.916367	1
NR_037225	chr11	120014767	120014853	+	86	1	Mir3065|mir-3065|mmu-mir-3065|-|11 E2|11 83.96 cM|ncRNA	-1.86732	-1.86725	-1.86737	-1.86734	-1.86698	0.479069	0.914707	1
NM_007581	chr15	98634767	98644536	+	2807	1	Cacnb3|Beta3|CAB3|Ca(v)beta3|Cchb3|-|15 F1|15 54.64 cM|protein-coding	9.55693	9.56424	9.55715	9.54854	9.54281	-0.0484766	0.544236	0.999671
NM_133760	chr5	115478010	115484484	-	1546	1	Sirt4|4930596O17Rik|-|5|5 F|protein-coding	7.89692	7.86837	7.8951	7.88785	7.88338	0.0662465	0.647244	1
NM_145579	chr7	18991245	19001766	+	2170	1	Mypop|Myodysa|P42pop|-|7|7 A3|protein-coding	8.72018	8.71552	8.71719	8.73414	8.72553	0.0528189	0.615246	0.999671
NM_147037	chr1	92573125	92574206	+	1079	1	Olfr1413|MOR208-1|-|1|1 D|protein-coding	0	0	0	0	0	NA	1	1
NM_133886	chr4	126753770	126854336	+	4361	1	AU040320|A730047D20Rik|AAVR|Kiaa0319l|-|4|4 D2.2|protein-coding	10.221	10.194	10.2336	10.2339	10.2714	0.128489	0.0653179	0.833214
NR_104384	chr14	51451962	51461293	+	2434	1	Vmn2r89|V2r10|V2r11|-|14|14 C1|protein-coding	-0.064094	-0.0658792	-0.0655319	-0.0659967	-0.0653321	-1.44614	0.509981	1
NM_054095	chr8	119446719	119472635	+	1956	1	Necab2|Efcbp2|-|8|8 E1|protein-coding	0.919319	0.919078	0.919474	0.920441	0.918068	0.160968	0.918727	1
NM_001101471	chr12	76324891	76334151	+	6681	1	Akap5|3526401B18Rik|AKAP 150|AKAP-5|AKAP150|BB098886|Gm258|P150|-|12|12 C3|protein-coding	7.11243	7.11738	7.10057	7.09284	7.0996	-0.303165	0.0871466	1
NM_001011858	chr7	108564837	108565793	-	955	1	Olfr504|MOR40-15|MOR40-7P|-|7|7 E3|protein-coding	0	0	0	0	0	NA	1	1
NM_028523	chr16	58408535	58469745	+	6469	1	Dcbld2|1700055P21Rik|AW146002|CLCP1|Esdn|-|16|16 C1.2|protein-coding	12.519	12.509	12.4798	12.533	12.5475	0.0109208	0.799358	0.999671
NR_045857	chr11	24481909	24569951	+	739	1	4933430M04Rik|-|-|11|11 A3.2|ncRNA	0	0	0	0	0	NA	1	1
NM_198622	chr6	87980421	87981482	-	1059	1	H1fx|Gm461|H1.10|H1X|-|6|6 D1|protein-coding	8.9528	8.9406	8.96606	8.97463	8.93669	0.0759945	0.457149	0.999671
NM_053130	chr18	37320381	37323913	+	3530	1	Pcdhb5|Pcdhb4A|PcdhbE|-|18|18 B3|protein-coding	6.85238	6.84863	6.8554	6.84928	6.85644	0.0679224	0.72862	1
NM_175667	chr2	136532321	136555854	+	2710	1	Ankef1|AV276460|Ankrd5|-|2|2 F3|protein-coding	0	0	0	0	0	NA	1	1
NR_027974	chr13	119487257	119488384	-	1127	1	3110070M22Rik|-|-|13|13 D2.3|ncRNA	3.05703	3.05716	3.0554	3.05481	3.05917	-0.174362	0.80997	1
NM_008080	chr10	127165156	127172340	+	2461	1	B4galnt1|4933429D13Rik|Gal-NAc-T|GalNAc-T|GalNAcT|Galgt1|Ggm-2|Ggm2|-|10 D3|10 74.5 cM|protein-coding	9.52642	9.51691	9.54722	9.54617	9.55608	0.127084	0.116204	0.960695
NR_033673	chr7	104532959	104535361	-	1887	1	Trim30e-ps1|EG625321|Gm6577|Trim30-4|-|7 E3|7|pseudo	0	0	0	0	0	NA	1	1
NR_106166	chr19	41588651	41588789	+	138	1	Mir8091|Gm27575|mmu-mir-8091|-|19|19 C3|ncRNA	4.40622	4.40192	4.40487	4.40276	4.40158	-0.110278	0.807889	1
NM_029578	chr14	118111911	118132765	-	2251	1	Tgds|2610017J16Rik|2610025M23Rik|AI648925|-|14|14 E4|protein-coding	8.56922	8.58806	8.5568	8.55336	8.5551	-0.172626	0.116698	0.963152
NM_133720	chr14	73029128	73049114	-	1794	1	Cysltr2|2300001H05Rik|CYSLT2R|Cltr2|Cyslt2|-|14|14 D3|protein-coding	0	0	0	0	0	NA	1	1
NM_031197	chr3	28697903	28728360	+	2557	1	Slc2a2|AI266973|Glut-2|Glut2|-|3 A3|3 12.19 cM|protein-coding	0	0	0	0	0	NA	1	1
NM_001101488	chr7	125878419	126082411	-	3915	1	Gsg1l|AI852434|C230098I05Rik|G630023A01Rik|Gm637|g1l|-|7|7 F3|protein-coding	0.842142	0.841246	0.840617	0.841415	0.84154	-0.623383	0.67969	1
NM_033588	chr18	37694501	37841870	+	4534	1	Pcdhga5|-|-|18|18 B3|protein-coding	11.1609	11.1339	11.1758	11.1926	11.2057	0.104696	0.045392	0.769577
NR_002322	chr11	3639785	3647536	-	6717	1	Tug1|AI316828|-|11|11 A1|ncRNA	13.0218	13.0084	13.0153	13.0068	12.9947	-0.0162446	0.638326	0.999671
NM_001110015	chr18	32837225	32866420	+	3256	1	Wdr36|5730444A13Rik|Ta-wdrp|-|18|18 B1|protein-coding	12.1026	12.096	12.0831	12.1096	12.0915	-0.00914909	0.823528	0.999671
NM_021462	chr10	80665318	80676293	-	3432	1	Mknk2|2010016G11Rik|Gprk7|Mnk2|-|10|10 C1|protein-coding	11.554	11.5589	11.5333	11.5639	11.5525	-0.0142964	0.758936	0.999671
NM_001167534	chr4	3172083	3173003	+	919	1	Vmn1r2|Gm11776|OTTMUSG00000004179|-|4 A1|4|protein-coding	0	0	0	0	0	NA	1	1
NR_045467	chr8	77624172	77628956	+	355	1	1700092C02Rik|-|-|8|8 C1|ncRNA	0	0	0	0	0	NA	1	1
NM_001081373	chr9	45766946	45828638	-	5456	1	Cep164|AI450905|BC027092|D030051D21|mKIAA1052|-|9|9 A5.2|protein-coding	11.5745	11.5694	11.5713	11.5775	11.5888	0.0152183	0.738102	0.999671
NM_001037931	chr14	67304888	67314711	-	2012	1	Gm6878|EG628416|-|14 D1|14|protein-coding	0	0	0	0	0	NA	1	1
NR_039543	chr1	159340358	159340423	+	65	1	Mir1843b|mir-1843b|mmu-mir-1843b|-|1 H1|1 69.03 cM|ncRNA	2.82815	2.8265	2.82817	2.82536	2.82703	-0.152125	0.845662	1
NM_177889	chr7	30056034	30072823	-	2098	1	Zfp82|A030010D05|Krab16|Mszf3|Zfp-82|-|7|7 B1|protein-coding	6.26971	6.26163	6.25014	6.24953	6.25407	-0.438674	0.0622677	1
NM_027477	chr6	47835661	47868257	+	3470	1	Zfp398|5730513I23Rik|-|6|6 B2.3|protein-coding	8.38847	8.37833	8.37244	8.37419	8.3643	-0.108602	0.351268	0.999671
NM_025841	chr5	143403820	143421904	+	1843	1	Kdelr2|1110007A14Rik|-|5|5 G2|protein-coding	13.1966	13.203	13.1786	13.1999	13.182	-0.0214877	0.522383	0.999671
NM_001160386	chr1	46066738	46373550	+	12250	1	Dnah7b|Dnahc7b|Gm107|-|1|1 C1.1|protein-coding	-1.262	-1.26188	-1.26206	-1.26148	-1.26145	1.47959	0.649349	1
NM_020493	chr17	46546839	46556162	-	4084	1	Srf|AW049942|AW240594|-|17|17 C|protein-coding	12.4784	12.4613	12.3421	12.3831	12.4355	-0.151302	0.00133362	0.129031
NM_172628	chr18	61953075	62015719	+	4521	1	Sh3tc2|D430044G18Rik|-|18|18 E1|protein-coding	10.477	10.489	10.4783	10.5075	10.5123	0.0495305	0.427733	0.999671
NM_001113414	chr7	137193671	137314445	-	4978	1	Ebf3|3110018A08Rik|O/E-2|mKIAA4201|-|7|7 F3|protein-coding	2.03435	2.03199	2.0317	2.03287	2.03188	-0.555395	0.583693	1
NM_007924	chr8	70539675	70592858	+	3071	1	Ell|Ell1|Men|-|8|8 B3.3|protein-coding	9.72638	9.71911	9.73585	9.72361	9.72853	0.0269937	0.72189	0.999671
NM_021323	chr7	6730583	6967219	+	7466	1	Usp29|Ocat|-|7 A1|7 4.04 cM|protein-coding	-1.86732	-1.86725	-1.86737	-1.86734	-1.86698	0.479069	0.914707	1
NM_007637	chr15	31590884	31601804	-	1756	1	Cct5|CCT-epsilon|Ccte|TCP-1-epsilon|TCPE|mKIAA0098|-|15|15 B2|protein-coding	14.5287	14.5438	14.5601	14.5544	14.5386	0.0226741	0.438451	0.999671
NM_019793	chr9	56135884	56161070	-	1720	1	Tspan3|1700055K04Rik|TM4-A|Tm4sf8|-|9|9 B|protein-coding	12.7323	12.7304	12.7274	12.7197	12.6996	-0.0273383	0.454005	0.999671
NM_018789	chrX	101254528	101260873	+	3157	1	Foxo4|Afxh|Mllt7|afx|-|X D|X 43.89 cM|protein-coding	8.61911	8.58837	8.61245	8.6066	8.6004	0.0177996	0.874232	0.999671
NM_026758	chr8	117791645	117801929	-	1047	1	Mphosph6|1110001M01Rik|AA536809|C86426|-|8|8 E1|protein-coding	9.44026	9.45891	9.44959	9.44413	9.41648	-0.0585819	0.496749	0.999671
NM_025407	chr9	108936648	108949641	+	1641	1	Uqcrc1|1110032G10Rik|-|9 F2|9 59.63 cM|protein-coding	12.691	12.7104	12.661	12.6809	12.676	-0.0491433	0.180541	0.998189
NM_146852	chr4	118734531	118735478	+	946	1	Olfr1339|MOR258-2|-|4|4 D2.1|protein-coding	0	0	0	0	0	NA	1	1
NR_034051	chr15	98519717	98519834	-	117	1	Snora34|MBI-89|-|15 F1|15|snoRNA	4.82129	4.81564	4.81981	4.82117	4.81872	0.116904	0.768835	1
NM_009432	chr3	102777398	102782714	-	638	1	Tshb|-|-|3 F2.2|3 45.25 cM|protein-coding	1.37367	1.37583	1.37496	1.37422	1.37503	-0.00224474	0.998614	1
NM_145837	chr14	57524829	57543166	+	1217	1	Il17d|AI462269|IL-17D|-|14|14 C3|protein-coding	-1.31071	-1.3111	-1.31081	-1.31123	-1.3112	-0.885712	0.795207	1
NM_146898	chr2	88972954	88980267	-	1292	1	Olfr1213|MOR233-7|-|2|2 E1|protein-coding	0	0	0	0	0	NA	1	1
NM_146431	chr14	52409889	52410927	-	1036	1	Olfr1510|MOR223-6|-|14|14 C2|protein-coding	0	0	0	0	0	NA	1	1
NM_001177797	chr19	56912354	57008575	-	3894	1	Afap1l2|AU041783|C86904|mKIAA1914|-|19|19 D2|protein-coding	9.72182	9.70151	9.69638	9.69007	9.71112	-0.053281	0.491186	0.999671
NM_027964	chr2	83915079	83941226	-	2051	1	Zswim2|1700025P14Rik|4933437F18Rik|MEX|-|2|2 D|protein-coding	0	0	0	0	0	NA	1	1
NM_146050	chr14	8348948	8378763	-	1239	1	Oit1|2310076N21Rik|AV067083|EF-7|Fam3d|-|14|14 A1|protein-coding	0.371317	0.369587	0.370381	0.37062	0.369461	-0.509833	0.789173	1
NM_011375	chr6	72097608	72154570	+	2444	1	St3gal5|3S-T|Siat9|[a]2|-|6|6 C1|protein-coding	10.7581	10.7527	10.7581	10.7325	10.7356	-0.036368	0.523358	0.999671
NR_131108	chr6	4031841	4047584	-	491	1	4930528H21Rik|-|-|6|6 A1|ncRNA	-1.86699	-1.86725	-1.86737	-1.86733	-1.86732	-1.83967	0.683538	1
NM_015739	chr5	24504426	24526848	-	1448	1	Gbx1|Gbx-1|-|5 A3|5 11.93 cM|protein-coding	2.68039	2.68139	2.68133	2.68072	2.67986	-0.0858287	0.915862	1
NR_037959	chr7	109998377	110006646	-	613	1	1600010M07Rik|-|-|7|7 E3|ncRNA	0.00784479	0.00814705	0.0076554	0.00779984	0.00786569	-0.484815	0.805642	1
NR_126551	chr14	114940225	114945948	-	836	1	1700100I10Rik|1700085D13Rik|4930481K08Rik|-|14|14 E4|ncRNA	0	0	0	0	0	NA	1	1
NM_026792	chr8	18846279	18884413	+	3819	1	Agpat5|1110013A05Rik|D8Ertd319e|-|8 A1.3|8 10.3 cM|protein-coding	11.1084	11.109	11.0907	11.0975	11.0937	-0.0362873	0.474819	0.999671
NM_053169	chr11	62820253	62842948	+	3888	1	Trim16|9130006M08Rik|AI482483|EBBP|-|11|11 B2|protein-coding	10.8105	10.7952	10.8154	10.795	10.827	0.025273	0.656111	0.999671
NM_175639	chr17	71616215	71659031	+	3430	1	Wdr43|2610318G08Rik|AU020887|AV024208|Wrd43|mKIAA0007|-|17|17 E1.3|protein-coding	13.1185	13.1132	13.0942	13.0823	13.1043	-0.037392	0.270481	0.999671
NM_144526	chr11	72042502	72047370	+	1458	1	Fam64a|2610008F03Rik|6720460F02Rik|AI115087|CATS|-|11|11 B4|protein-coding	11.4436	11.4263	11.4351	11.4492	11.4286	0.00531804	0.910952	0.999671
NM_011347	chr1	164115264	164150026	+	3421	1	Selp|CD62P|GMP-140|Grmp|LECAM3|PADGEM|-|1 H2.2|1 71.42 cM|protein-coding	3.52764	3.52869	3.52439	3.52957	3.52723	-0.21653	0.725012	1
NM_194065	chr5	134901593	134906733	-	842	1	Wbscr28|1700111I05Rik|-|5|5 G2|protein-coding	-0.819231	-0.819721	-0.819379	-0.819266	-0.819834	-0.0626183	0.982111	1
NM_175665	chr13	22035821	22036320	+	497	1	Hist1h2bk|-|-|13|13 A3.1|protein-coding	11.6076	11.8566	11.8724	11.5564	11.3895	-0.253497	0.55448	0.999671
NM_139064	chr5	34496096	34513979	-	1958	1	Tnip2|1810020H16Rik|ABIN-2|AI428870|-|5|5 B2|protein-coding	9.26033	9.29482	9.2918	9.26479	9.25516	-0.0339861	0.71739	0.999671
NM_053094	chr6	124304651	124330527	+	4390	1	Cd163|CD163v2|CD163v3|-|6|6 F2|protein-coding	1.53498	1.53568	1.53611	1.53488	1.53633	0.373921	0.763096	1
NM_001164526	chr4	60658466	60662395	-	905	1	Mup11|Gm12549|OTTMUSG00000007431|-|4|4 B3|protein-coding	0	0	0	0	0	NA	1	1
NM_011337	chr11	83647843	83649378	-	785	1	Ccl3|AI323804|G0S19-1|LD78alpha|MIP-1alpha|MIP1-(a)|MIP1-alpha|Mip1a|Scya3|-|11 C|11 51.04 cM|protein-coding	0	0	0	0	0	NA	1	1
NM_175158	chr10	88746607	88826814	-	8767	1	Utp20|3830408P06Rik|AA617408|Drim|mDRIM|mDRIN|-|10|10 C1|protein-coding	12.6223	12.5244	12.586	12.5439	12.5935	-0.000563339	0.990805	0.999671
NM_013830	chr13	34875494	34902878	+	4449	1	Prpf4b|2610037H07|Prp4|Prp4k|Prpk|cbp143|-|13|13 A3.3|protein-coding	12.5932	12.5872	12.5793	12.5581	12.5698	-0.0377515	0.307565	0.999671
NM_146566	chr9	18875329	18876276	+	946	1	Olfr830|MOR152-1|-|9|9 A2|protein-coding	0	0	0	0	0	NA	1	1
NM_146998	chr16	59148852	59149778	+	925	1	Olfr195|MOR184-5|-|16|16 C1.3|protein-coding	-1.8673	-1.86725	-1.86709	-1.86731	-1.8673	0.479068	0.916367	1
NM_019418	chr17	57189474	57194181	-	1863	1	Tnfsf14|HVEM-L|HVEML|LIGHT|LTg|Ly113|Tnlg1d|-|17|17 D|protein-coding	0	0	0	0	0	NA	1	1
NM_025464	chr9	37208223	37223228	+	1141	1	Tmem218|1810021J13Rik|AV004931|-|9|9 A4|protein-coding	7.87157	7.86595	7.87186	7.86441	7.86057	-0.0352917	0.798877	1
NM_001128609	chr1	171329145	171342501	+	2725	1	Dedd|CASP8IP1|DEFT|Dedpro1|FLDED1|KE05|-|1 H3|1 79.34 cM|protein-coding	11.0717	11.0795	11.0967	11.1047	11.091	0.0545527	0.287882	0.999671
NM_001037987	chr13	88821472	89323225	+	5345	1	Edil3|Del-1|Del1|-|13|13 C3|protein-coding	0.184627	0.183494	0.18381	0.184554	0.184022	0.122918	0.950487	1
NM_001039942	chr9	24625204	24625737	+	531	1	Cypt9|-|-|-|protein-coding	0	0	0	0	0	NA	1	1
NM_207028	chr6	42434535	42435461	+	925	1	Tas2r126|T2R12|T2R26|Tas2r26|Tas2r41|mGR26|mt2r35|-|6|6 B2.1|protein-coding	-0.38499	-0.384907	-0.384527	-0.385002	-0.383056	2.4509	0.346041	1
NM_010611	chr2	181075579	181135289	-	8265	1	Kcnq2|HNSPC|KQT2|Nmf134|-|2 H4|2 103.57 cM|protein-coding	1.13933	1.1406	1.13958	1.1405	1.14068	0.321586	0.820235	1
NR_040438	chr1	169969409	169972396	+	1132	1	3110045C21Rik|AI838577|-|1|1 H3|ncRNA	7.09785	7.09877	7.09135	7.08926	7.09634	-0.10814	0.543909	1
NR_046158	chr13	101232127	101247551	+	2435	1	5930438M14Rik|5930438M14|-|13|13 D1|ncRNA	0	0	0	0	0	NA	1	1
NM_016803	chr10	60181528	60219260	-	6106	1	Chst3|C6ST|C6ST-1|GST-0|-|10|10 B4|protein-coding	7.57775	7.56377	7.5747	7.58146	7.58247	0.117223	0.450886	1
NM_008230	chr2	126593660	126618678	-	2385	1	Hdc|AW108189|Hdc-a|Hdc-c|Hdc-e|Hdc-s|-|2 F1|2 61.76 cM|protein-coding	1.39848	1.39626	1.39733	1.39833	1.39791	0.435174	0.74739	1
NM_009309	chr17	8434423	8442496	+	2036	1	T|Bra|D17Mit170|Low|Lr|T1|Tl2|Tl3|cou|me75|-|17 A1|17 4.92 cM|protein-coding	0.025373	0.0256776	0.0251819	0.0247046	0.0260579	-0.4573	0.82181	1
NR_035519	chr4	139967526	139967620	-	94	1	Mir2139|mmu-mir-2139|-|4 D3|4 71.03 cM|ncRNA	0	0	0	0	0	NA	1	1
NM_007465	chr9	7818226	7837057	-	3322	1	Birc2|AW146227|Api1|Api2|Birc3|C-IAP1|C330006D17Rik|HIAP1|HIAP2|IAP1|IAP2|MIAP1|MIAP2|MIHB|MIHC|RNF48|cIAP1|cIAP2|mcIAP1|-|9|9 A1|protein-coding	10.4067	10.4316	10.368	10.3698	10.369	-0.154782	0.0133631	0.488643
NM_134152	chr19	12798609	12833808	+	1662	1	Lpxn|4933402K05Rik|A530083L21Rik|AV278559|LDPL|-|19|19 A|protein-coding	1.35982	1.35856	1.35801	1.3578	1.35729	-1.25136	0.322111	1
NM_007805	chr11	105933704	105944147	-	2466	1	Cyb561|-|-|11 E1|11 68.81 cM|protein-coding	1.4622	1.4608	1.46308	1.46085	1.46035	-0.0586843	0.963825	1
NR_002839	chr6	6863797	6865150	-	1353	1	Dlx6os2|Dlx6as|Dlx6as2|-|6 A1|6 2.83 cM|ncRNA	0	0	0	0	0	NA	1	1
NM_030687	chr6	141805440	141856171	-	3804	1	Slco1a4|AI785519|Oatp1a4|Oatp2|Slc21a5|-|6|6 G2|protein-coding	0	0	0	0	0	NA	1	1
NM_001177574	chr12	87892834	87896722	+	1818	1	Gm2022|-|-|12 D2|12|protein-coding	0.778598	0.778337	0.778766	0.778515	0.777989	-0.058388	0.970157	1
NM_001112705	chr11	105181527	105283959	+	5457	1	Tlk2|4933403M19Rik|PKU-alpha|PKUalpha|Tlk|-|11|11 E1|protein-coding	11.9101	11.9289	11.9191	11.8964	11.9103	-0.0211078	0.621521	0.999671
NR_049193	chr7	7298891	7298946	+	55	1	Mir5620|Gm23572|mir-5620|mmu-mir-5620|-|7|7 A1|ncRNA	0.938921	0.938682	0.939075	0.938834	0.938961	0.188167	0.899454	1
NM_001033293	chr2	25361492	25365626	-	1679	1	Uap1l1|5730445F03Rik|-|2|2 A3|protein-coding	10.3077	10.2784	10.2887	10.2869	10.3048	-0.000548884	0.993315	0.999671
NM_024465	chr2	150832515	150904731	-	1952	1	Abhd12|1500011G07Rik|6330583M11Rik|AI431047|AW547313|-|2|2 G3|protein-coding	11.506	11.507	11.537	11.5431	11.5239	0.0622783	0.177583	0.998189
NM_026254	chr16	57168864	57231466	-	3630	1	Tbc1d23|4930451A13Rik|AU015720|AU043671|AU043778|D030022P07Rik|W51689|-|16|16 C1.1|protein-coding	10.2173	10.2314	10.2167	10.2266	10.2139	-0.016922	0.796054	0.999671
NM_026816	chr14	75896937	76010865	-	1457	1	Gtf2f2|1110031C13Rik|AI326315|-|14|14 D3|protein-coding	9.74164	9.71745	9.75444	9.73657	9.74646	0.0657473	0.39449	0.999671
NR_037604	chr10	127824216	127846565	+	3644	1	Rdh18-ps|Rdh18|-|10|10 D3|pseudo	2.05621	2.05723	2.05868	2.05727	2.05564	0.280063	0.789686	1
NM_134129	chr19	10895231	10909559	+	6143	1	Prpf19|AA617263|AL024362|D19Wsu55e|NMP200|PSO4|Prp19|Snev|-|19 A|19 7.33 cM|protein-coding	13.1696	13.1627	13.1439	13.1369	13.1276	-0.0500043	0.134889	0.973721
NM_001134661	chr9	98856591	98857352	+	760	1	Prr23a2|EG623186|Gm6406|-|9|9 E3.3|protein-coding	0	0	0	0	0	NA	1	1
NM_025823	chr6	86386006	86397150	-	4283	1	Pcyox1|1200015P13Rik|AI115532|AI448340|PCL1|Pcly|-|6|6 D1|protein-coding	12.1261	12.143	12.1679	12.1527	12.1357	0.0349235	0.397725	0.999671
NM_178411	chr2	165377436	165388259	-	5026	1	Zfp334|D2Ertd535e|-|2|2 H3|protein-coding	9.91865	9.91292	9.91782	9.93556	9.92984	0.0446974	0.53363	0.999671
NR_033141	chr14	77479483	77506868	-	1157	1	Gm6994|EG629678|-|14 D3|14|ncRNA	-1.86732	-1.86725	-1.86736	-1.86702	-1.86731	0.479068	0.916367	1
NR_015347	chr1	31264847	31268061	+	912	1	Gm4850|EG226957|-|1|1 B|pseudo	0	0	0	0	0	NA	1	1
NM_010233	chr1	71585473	71653234	-	8377	1	Fn1|E330027I09|Fn|Fn-1|-|1 C3|1 36.05 cM|protein-coding	17.0309	16.9041	17.0161	16.8861	16.9692	-0.0154971	0.854532	0.999671
NM_008145	chr14	67745181	67749436	+	564	1	Gnrh1|Gnrh|Gnrh2|LHRH|Lhrh1|Lnrh|hpg|-|14|14 D1|protein-coding	5.04328	5.03918	5.04136	5.03564	5.03064	-0.368768	0.322938	1
NM_145857	chr8	88647347	88688474	+	4606	1	Nod2|ACUG|BLAU|CD|Card15|F830032C23Rik|IBD1|Nlrc2|-|8|8 C3|protein-coding	7.38059	7.36524	7.37919	7.36189	7.36451	-0.0672512	0.690522	1
NM_001085419	chr4	144099880	144110101	+	2399	1	Gm13102|OTTMUSG00000010432|-|4|4 E1|protein-coding	0	0	0	0	0	NA	1	1
NM_027862	chr11	115415697	115419919	-	566	1	Atp5h|0610009D10Rik|-|11|11 E2|protein-coding	12.7748	12.7841	12.7458	12.7833	12.7592	-0.0288302	0.437668	0.999671
NM_025644	chr19	41922980	41933314	-	1612	1	Exosc1|2610035C18Rik|2610104C07Rik|2610312F07Rik|AI447561|-|19|19 C3|protein-coding	10.2529	10.2675	10.2542	10.2851	10.2615	0.0228092	0.730492	0.999671
NM_176912	chr7	16234585	16244154	-	3518	1	C5ar2|C5L2|E030029A11Rik|Gpr77|-|7|7 A2|protein-coding	1.05948	1.058	1.05888	1.05752	1.05761	-0.767494	0.591093	1
NM_001040692	chr13	73661750	73678023	-	4300	1	Slc6a18|B0AT3|D630001K16Rik|Xt2|Xtrp2|-|13 C1|13 40.13 cM|protein-coding	1.97403	1.97439	1.97382	1.97386	1.97411	-0.162258	0.874308	1
NM_146543	chr13	21674001	21674980	-	977	1	Olfr1360|MOR256-10|MOR256-35|-|13|13 A3.1|protein-coding	0	0	0	0	0	NA	1	1
NM_139296	chr6	40878794	40887494	-	1846	1	Moxd2|Dbhl1|-|6|6 B1|protein-coding	-0.0584343	-0.059592	-0.059245	-0.0597104	-0.0584015	-0.251344	0.908904	1
NM_021568	chr10	76761854	76961947	-	2157	1	Pcbp3|AlphaCP-3|-|10|10 C1|protein-coding	10.3889	10.3537	10.3258	10.3816	10.3633	-0.0467661	0.499137	0.999671
NM_175011	chr16	58635262	58638403	-	671	1	E330017A01Rik|-|-|16|16 C1.2|protein-coding	0	0	0	0	0	NA	1	1
NM_010275	chr15	7810048	7837580	+	4472	1	Gdnf|AI385739|ATF|-|15|15 A1|protein-coding	9.38211	9.3745	9.38285	9.398	9.39815	0.0706535	0.405814	0.999671
NM_028169	chr7	44496588	44501134	+	842	1	Fam71e1|0610007G24Rik|1700021N13Rik|1700021P22Rik|GARI-L5|-|7|7 B3|protein-coding	2.96156	2.96163	2.95839	2.9618	2.96108	-0.338525	0.647507	1
NR_045728	chr14	51986389	51988829	-	710	1	Gm16617|-|-|14 C2|14 26.75 cM|ncRNA	7.39301	7.4101	7.38554	7.39846	7.38962	-0.152845	0.355024	1
NM_001111336	chr3	98445684	98457031	-	1684	3	Hsd3b4|-|-|3 F2.2|3 42.79 cM|protein-coding	-1.31137	-1.31127	-1.31098	-1.3109	-1.31137	1.30074	0.705003	1
NR_024198	chr8	3803125	3803361	-	236	1	Rprl3|RPRH4|Rmrp4|-|8 1.92 cM|ncRNA	12.924	13.1384	12.9409	12.8112	12.8313	-0.297847	0.0663593	0.834287
NM_016851	chr1	193153112	193172035	+	4114	1	Irf6|AI876454|E230028I05Rik|mirf6|-|1 H6|1 97.6 cM|protein-coding	6.0549	6.0615	6.06239	6.06284	6.06114	0.144473	0.574478	1
NM_027745	chr11	120826542	120932872	-	3369	1	Ccdc57|4933434G05Rik|-|11|11 E2|protein-coding	8.3627	8.36347	8.3729	8.35399	8.34947	-0.0348062	0.771304	0.999671
NM_053199	chr1	173334254	173367695	-	4148	1	Cadm3|BIgR|Igsf4b|Necl-1|Necl1|SynCAM3|Tsll1|-|1|1 H3|protein-coding	0	0	0	0	0	NA	1	1
NM_134248	chr11	46751168	46779578	+	1882	1	Havcr1|AI503787|KIM-1|TIM-1|Tim1|Timd1|-|11|11 B1.1|protein-coding	0	0	0	0	0	NA	1	1
NM_001033431	chr7	3221510	3249740	-	4317	1	Nlrp12|Nalp12|PYPAF7|-|7|7 A1|protein-coding	-1.86732	-1.86725	-1.86737	-1.86734	-1.86698	0.479069	0.914707	1
NM_020568	chr17	56100591	56109802	-	5744	1	Plin4|S3-12|mKIAA1881|-|17|17 D|protein-coding	13.3106	13.263	13.2008	13.2119	13.2258	-0.123342	0.000602506	0.0785025
NM_023781	chr19	5502769	5503787	-	1016	1	1700020D05Rik|mage-g2|-|19|19 A|protein-coding	4.15884	4.15614	4.15852	4.16103	4.15729	0.19107	0.702534	1
NM_001163217	chr5	33722306	33737068	+	4001	1	Fgfr3|CD333|FR3|Fgfr-3|Flg-2|HBGFR|Mfr3|sam3|-|5 B2|5 17.83 cM|protein-coding	2.00051	2.00132	2.00207	2.00341	2.00186	1.01677	0.362769	1
NM_001252518	chrX	101429651	101448593	+	2451	1	Nono|AA407051|AV149256|NRB54|P54NRB|nonA|-|X|X D|protein-coding	14.5524	14.5599	14.5432	14.5235	14.5203	-0.040752	0.16303	0.985688
NM_134074	chr14	121542039	121797734	-	7705	1	Dock9|AA959601|AW538057|B230309H04Rik|D14Wsu89e|Zizimin1|mKIAA1058|-|14 E5|14 65.28 cM|protein-coding	10.5773	10.5704	10.6013	10.5763	10.5917	0.0464132	0.43615	0.999671
NM_001166480	chrX	73787028	73790828	+	796	1	Ssr4|AW743063|C78062|Trap|-|X A7.3|X 37.41 cM|protein-coding	11.7022	11.6992	11.6645	11.7354	11.7307	0.0202338	0.692906	0.999671
NM_009909	chr1	74153994	74161246	+	3039	1	Cxcr2|CD128|CDw128|Cmkar2|Gpcr16|IL-8Rh|IL-8rb|IL8RA|Il8rb|mIL-8RH|-|1 C3|1 38.41 cM|protein-coding	5.1346	5.12312	5.12054	5.12736	5.12595	-0.279925	0.441259	1
NM_175226	chr15	58889229	58902390	+	4344	1	Rnf139|4930555P18Rik|-|15|15 D1|protein-coding	11.6686	11.7044	11.6962	11.7127	11.6936	0.0313706	0.493721	0.999671
NM_078477	chr10	80567121	80577296	-	2648	1	Klf16|AI843742|BTEB4|DRRF|-|10|10 C1|protein-coding	10.7626	10.7662	10.8204	10.823	10.7943	0.132283	0.0197513	0.603798
NR_015560	chr4	125887851	125922310	-	3537	1	2610028E06Rik|BB043107|-|4|4 D2.2|ncRNA	4.46712	4.47494	4.46951	4.46682	4.46559	-0.376492	0.398702	1
NM_178717	chr15	11033717	11037968	-	4249	1	Rxfp3|BC053073|GPCR135|Rln3r1|Salpr|-|15|15 A1|protein-coding	0	0	0	0	0	NA	1	1
NM_008142	chr4	155491361	155559269	+	3129	1	Gnb1|AA409223|C77571|Gnb-1|-|4 E2|4 86.17 cM|protein-coding	12.6662	12.7056	12.7013	12.7101	12.7341	0.052112	0.179815	0.998189
NM_146901	chr2	89022995	89024099	-	1102	1	Olfr1217|MOR233-4|-|2|2 E1|protein-coding	0	0	0	0	0	NA	1	1
NM_001104570	chr17	20462373	20481236	-	2561	1	Vmn2r108|EG627805|-|17|17 A3.2|protein-coding	0	0	0	0	0	NA	1	1
NM_024284	chr17	24850490	24864450	+	1180	1	Hagh|BC019817|Glo-2|Glo2|Rsp29|-|17 A3.3|17 12.53 cM|protein-coding	10.0276	10.0008	10.0181	10.0312	10.0325	0.0455635	0.520073	0.999671
NM_007708	chr5	115845656	116006341	+	6847	1	Cit|C030025P15Rik|CRIK|CRIK-SK|Cit-k|-|5|5 F|protein-coding	10.9037	10.8789	10.9509	10.8848	10.8994	0.0541593	0.374761	0.999671
NR_045001	chr16	49980460	49997475	+	1428	1	Gm6936|-|-|16 B5|16|ncRNA	0	0	0	0	0	NA	1	1
NM_033602	chr14	48120869	48260883	+	5841	1	Peli2|AW047589|BB129927|-|14 C1|14 24.6 cM|protein-coding	10.7624	10.7456	10.7308	10.7488	10.7639	-0.0181405	0.753328	0.999671
NM_080452	chr2	28468066	28471177	+	2073	1	Mrps2|1500019M10Rik|-|2|2 A3|protein-coding	10.7004	10.718	10.7131	10.6617	10.6852	-0.0611475	0.316292	0.999671
NM_018794	chrX	74297097	74304721	+	2177	1	Atp6ap1|16A|AC45|AI316502|AW108110|Atp6ip1|Atp6s1|C7-1|CF2|VATPS1|XAP-3|mFLJ00383|-|X A7.3|X 37.96 cM|protein-coding	12.6786	12.7036	12.6426	12.6759	12.6811	-0.0430834	0.265679	0.999671
NM_001316675	chr11	21556692	21571934	-	1947	1	Mdh1|B230377B03Rik|D17921|MDH-s|MDHA|Mor-2|Mor2|-|11 A3.1|11 13.89 cM|protein-coding	12.8875	12.8859	12.8923	12.9194	12.9001	0.0294893	0.405937	0.999671
NM_001001932	chr10	95940663	96045518	+	7805	1	Eea1|A430109M19Rik|B230358H09Rik|ZFYVE2|-|10|10 C2|protein-coding	12.73	12.673	12.7143	12.6939	12.7301	0.0181043	0.657645	0.999671
NR_030555	chr1	185537336	185988795	+	68	1	Mir297c|Mirn297c|-|2 A1|2|ncRNA	0	0	0	0	0	NA	1	1
NM_025642	chr16	90719312	90727371	-	1293	1	Mis18a|2610039C10Rik|2810018N07Rik|-|16|16 C3.3|protein-coding	9.28655	9.30836	9.28733	9.29279	9.26665	-0.075349	0.399972	0.999671
NM_001270613	chr8	21565386	21566344	+	394	2	Defa36|Gm21498|-|8 A2|8|protein-coding	0	0	0	0	0	NA	1	1
NM_010795	chr15	80173721	80215519	+	4661	1	Mgat3|1110038J12Rik|AI848272|GnT-III|-|15 E1|15 37.85 cM|protein-coding	8.95341	8.95344	8.96381	8.96221	8.9592	0.0504867	0.599902	0.999671
NR_027008	chr6	113070399	113077244	-	1212	1	Gt(ROSA)26Sor|AV258896|Gtrgeo26|Gtrosa26|R26|ROSA26|Thumpd3as1|-|6 E3|6 52.73 cM|ncRNA	9.01674	9.01431	9.03906	9.03745	9.01194	0.0826681	0.395081	0.999671
NM_147056	chr7	104106281	104107219	+	937	1	Olfr646|MOR33-2|-|7|7 E3|protein-coding	0	0	0	0	0	NA	1	1
NR_073086	chr2	74679558	74687016	+	3364	1	Hoxd11|E230017H14Rik|Hox-4.6|Hox-5.4|Hox-5.5|-|2 C3|2 44.13 cM|protein-coding	0.00784479	0.00814705	0.0076554	0.00779984	0.00786569	-0.484815	0.805642	1
NR_104381	chr4	152086863	152115404	+	3800	1	Plekhg5|BC023181|Syx|-|4|4 E2|protein-coding	9.48421	9.45689	9.47472	9.45217	9.48527	-0.000588498	0.994545	0.999671
NM_023190	chr14	54642161	54686931	-	4714	1	Acin1|2610036I19Rik|2610510L13Rik|Acinus|Acn|C79325|acinusL|acinusS|mKIAA0670|-|14|14 C2|protein-coding	12.5567	12.5853	12.4885	12.5008	12.514	-0.125258	0.00113941	0.11845
NR_073433	chr5	45668701	45669708	-	1007	1	1600023N17Rik|AV119442|-|5|5 B3|ncRNA	2.97108	2.96744	2.96876	2.97125	2.96742	-0.036286	0.962183	1
NM_001190732	chr6	79818031	79818364	+	332	1	Gm20594|Mtrnr2l|-|6 C3|6 35.01 cM|protein-coding	-0.639573	-0.639342	-0.640299	-0.640261	-0.639555	-1.97631	0.424083	1
NM_153564	chr3	142496934	142522344	+	3008	1	Gbp5|5330409J06Rik|Gbp5a|-|3|3 H1|protein-coding	-0.430271	-0.430187	-0.429812	-0.429093	-0.42963	2.39228	0.336635	1
NM_001312914	chr5	117414002	117767988	+	6086	1	Ksr2|-|-|5|5 F|protein-coding	0	0	0	0	0	NA	1	1
NM_008530	chr15	75268421	75272234	+	871	1	Ly6f|-|-|15|15 D3|protein-coding	3.70376	3.7056	3.70522	3.70568	3.70595	0.170605	0.767506	1
NM_028493	chr13	75869537	75943824	-	4923	1	Rhobtb3|1700040C17Rik|2610033K01Rik|4930503C18Rik|AI317148|AW208826|mKIAA0878|-|13|13 C1|protein-coding	12.3223	12.3024	12.3083	12.3131	12.3153	-0.00111408	0.97711	0.999671
NM_153406	chr10	75212073	75312400	+	6044	1	Specc1l|4930470P14Rik|4932439K10Rik|9530057A13Rik|AI317249|Cytsa|mKIAA0376|-|10|10 C1|protein-coding	11.978	11.9493	11.9908	11.9695	12.0165	0.056057	0.211033	0.999671
NM_001164813	chr2	144368983	144373337	+	319	1	Pet117|Gm20571|-|2|2 G1|protein-coding	7.44249	7.4473	7.45098	7.44593	7.42802	-0.0457178	0.781977	1
NM_139138	chr17	55749984	55853662	+	3472	1	Adgre4|D17Ertd479e|Egf-tm7|Emr4|Fire|Gpr127|-|17 C-D|17 28.98 cM|protein-coding	-0.0584343	-0.059592	-0.059245	-0.0597104	-0.0584015	-0.251344	0.908904	1
NM_172815	chr15	43020795	43170818	-	3332	1	Rspo2|2610028F08Rik|AA673245|D430027K22|ftls|-|15 B3.1-B3.2|15 16.73 cM|protein-coding	-1.86732	-1.86725	-1.86736	-1.86702	-1.86731	0.479068	0.916367	1
NM_027823	chr9	8994953	9239013	-	5379	1	Arhgap42|9030420J04Rik|BE136619|-|9|9 A1|protein-coding	11.0933	11.0889	11.0904	11.1194	11.1392	0.0617976	0.253698	0.999671
NR_131196	chr11	102375551	102377020	-	674	1	Bloodlinc|Gm11616|OTTMUSG00000002784|-|11 D|11 66.29 cM|ncRNA	1.57447	1.57435	1.57609	1.57557	1.57516	1.06418	0.412007	1
NM_028110	chr3	106486040	106503030	+	4034	1	Dennd2d|2010308M01Rik|AI451421|-|3|3 F2.3|protein-coding	6.4926	6.48546	6.47953	6.48393	6.49325	-0.094046	0.675561	1
NM_001081167	chr7	98192415	98199475	-	2364	1	B3gnt6|BC039789|Core-3|Core3|-|7|7 E1|protein-coding	1.69137	1.68733	1.68882	1.68753	1.69021	-0.33789	0.787373	1
NM_001271496	chr19	3851773	3894369	+	2613	1	Chka|CK|CK/EK-alpha|Chetk-alpha|Chk|ChoK|EK|EtnK-alpha|-|19 A|19 3.57 cM|protein-coding	10.1893	10.1982	10.2125	10.2194	10.222	0.0819309	0.211877	0.999671
NM_001271547	chr18	36528152	36556272	+	2943	1	Slc4a9|AE4|D630003B07|D630024F24Rik|-|18|18 B2|protein-coding	2.14002	2.13997	2.13795	2.13916	2.13815	-0.77826	0.416783	1
NM_053137	chr18	37435621	37438654	+	3031	1	Pcdhb12|Pcdh3|Pcdhb5F|PcdhbL|-|18 19.49 cM|18 B3|protein-coding	3.75125	3.74951	3.74927	3.74628	3.7464	-0.504979	0.366744	1
NM_028554	chrX	86044199	86047313	+	1043	1	Samt3|1700072E05Rik|-|X|X C1|protein-coding	0	0	0	0	0	NA	1	1
NM_001252109	chr6	23596254	23839421	-	1474	1	Cadps2|A230044C21Rik|Caps-2|Caps2|Cpd2|-|6|6 A3.1|protein-coding	0	0	0	0	0	NA	1	1
NM_019710	chrX	152016428	152061973	+	3943	1	Smc1a|5830426I24Rik|SMC-1A|Sb1.8|Smc1|Smc1alpha|Smc1l1|Smcb|mKIAA0178|-|X|X F3|protein-coding	13.6406	13.6312	13.6599	13.5618	13.5902	-0.0495921	0.239272	0.999671
NM_001105667	chr1	93792576	93801934	-	996	1	Dtymk|AU044245|CDC8|D10Ertd203e|TMPK|TYPK|Tmk|mtmk|-|1 D|1 47.34 cM|protein-coding	11.8344	11.8459	11.8418	11.8617	11.842	0.0175394	0.684361	0.999671
NR_045151	chr1	51218386	51333779	-	2547	1	9330175M20Rik|-|-|1 C1.1|1|ncRNA	0	0	0	0	0	NA	1	1
NM_001077202	chrX	51386637	51681602	-	4786	1	Hs6st2|6OST2|-|X|X A5|protein-coding	0	0	0	0	0	NA	1	1
NM_007925	chr5	134702595	134747323	-	3812	1	Eln|AI385707|AI480567|E030024M20Rik|-|5 G2|5 74.76 cM|protein-coding	0	0	0	0	0	NA	1	1
NR_030262	chr12	109728129	109728202	+	73	1	Mir539|Mirn539|mir-539|mmu-mir-539|-|12 F1|12|ncRNA	0	0	0	0	0	NA	1	1
NM_207549	chr16	59098066	59098990	-	921	1	Olfr192|-|-|16|16 C1.3|protein-coding	0	0	0	0	0	NA	1	1
NR_040291	chr1	88263113	88269408	-	3633	1	6430706D22Rik|-|-|-|ncRNA	14.2649	14.2414	14.1917	14.1842	14.1887	-0.100075	0.000782588	0.0944129
NM_007635	chr5	93267573	93276231	+	2484	1	Ccng2|-|-|5|5 E2|protein-coding	8.38581	8.40903	8.43856	8.40743	8.38147	0.0981088	0.462465	0.999671
NM_001326351	chr9	90162978	90200102	+	5446	1	Adamts7|ADAM-TS7|ADAMTS7B|-|9|9 E3.1|protein-coding	7.93639	7.92833	7.93641	7.92138	7.92682	-0.0449514	0.741904	1
NM_001034860	chr3	93068823	93075505	+	1805	1	Gm4858|EG229571|-|3 F1|3|protein-coding	-0.261287	-0.260346	-0.261348	-0.260046	-0.260611	0.491096	0.836741	1
NM_199309	chr16	32496281	32507214	+	1299	1	Zdhhc19|Gm1744|Gm616|-|16|16 B3|protein-coding	0	0	0	0	0	NA	1	1
NR_045040	chr5	23850597	23855033	+	1366	1	2700038G22Rik|-|-|5|5 A3|ncRNA	7.75973	7.77048	7.76993	7.77588	7.7858	0.146752	0.314062	1
NM_009739	chr7	127904073	127909664	+	2843	1	Bckdk|AI327402|-|7|7 F3|protein-coding	11.9977	11.9881	11.9771	11.9855	11.9925	-0.0161446	0.696371	0.999671
NM_001190985	chr1	67000517	67038872	-	4450	1	Lancl1|AW124738|Gpr69|Gpr69a|p40|-|1|1 C3|protein-coding	11.3569	11.3696	11.3382	11.3636	11.3646	-0.0175958	0.718929	0.999671
NM_009890	chr19	34473784	34475135	-	1349	1	Ch25h|AI462618|m25OH|-|19|19 C1|protein-coding	0	0	0	0	0	NA	1	1
NR_027801	chrX	71932438	71940871	+	2139	1	Gm1141|Pasd1|-|X|X A7.3|ncRNA	2.63141	2.63537	2.63262	2.63305	2.63217	-0.276473	0.739604	1
NM_001310763	chr5	149439660	149470979	+	1487	1	Tex26|4930588N13Rik|-|5|5 G3|protein-coding	2.02672	2.02646	2.02638	2.02652	2.02486	-0.364845	0.718993	1
NM_001012704	chr2	164685107	164687706	+	1070	1	Wfdc13|Wfdc13l1|-|2 H3|2|protein-coding	-1.86732	-1.86725	-1.86737	-1.86734	-1.86698	0.479069	0.914707	1
NM_001081247	chr14	24448694	24487046	-	4650	1	Polr3a|9330175N20Rik|BC053071|RPC1|RPC155|-|14|14 A3|protein-coding	10.7156	10.7057	10.679	10.6643	10.7033	-0.0799738	0.174045	0.995766
NM_175381	chr19	7417625	7425904	+	4982	1	2700081O15Rik|AI255177|AI848741|AW742297|-|19|19 A|protein-coding	10.8642	10.8483	10.8822	10.854	10.862	0.0257858	0.643509	0.999671
NM_207024	chr6	132700090	132701007	-	916	1	Tas2r121|T2R21|Tas2r13|Tas2r21|mGR21|mT2r48|-|6 G1|6 64.03 cM|protein-coding	0	0	0	0	0	NA	1	1
NM_001310460	chr3	32947926	33083060	-	5084	1	Pex5l|1700016J08Rik|PXR2|Pex2|TRIP8b|pex5Rp|-|3|3 A3|protein-coding	7.6274	7.61551	7.60907	7.61142	7.5971	-0.20205	0.183504	1
NM_009443	chr6	72608421	72617000	-	5018	1	Tgoln1|AU015504|D6Ertd384e|TGN38|TGN38A|Ttgn1|-|6 C1|6 32.27 cM|protein-coding	11.308	11.3623	11.3649	11.3193	11.327	0.00599935	0.912038	0.999671
NM_001005509	chr3	58525821	58557501	+	2283	1	Eif2a|D030048D22|D3Ertd194e|-|3 D|3 28.58 cM|protein-coding	11.9773	12.0046	11.9853	12.017	11.9803	0.00743866	0.865061	0.999671
NM_009479	chr7	133686355	133709295	-	1774	1	Uros|AI415298|UROIIIS|Uros3|-|7 F3|7 77.26 cM|protein-coding	8.82788	8.83341	8.79425	8.81122	8.80605	-0.172315	0.0881492	0.895395
NM_010439	chr5	149046702	149053057	-	2848	1	Hmgb1|HMG-1|Hmg1|SBP-1|p30|-|5 G3|5 89.18 cM|protein-coding	14.7129	14.7679	14.7992	14.7592	14.7196	0.0289634	0.449659	0.999671
NR_015491	chr16	98062512	98082439	-	2126	1	A630089N07Rik|-|-|16|16 C4|ncRNA	8.23419	8.23861	8.24672	8.25	8.2643	0.157266	0.204887	0.999671
NM_001003963	chr2	153649449	153687730	+	4111	1	Dnmt3b|MmuIIIB|-|2|2 H1|protein-coding	0.250581	0.249439	0.249228	0.249898	0.251263	0.235264	0.908584	1
NM_145621	chr9	107935920	107949691	+	3018	1	Camkv|1G5|BB074618|BC017634|-|9|9 F1|protein-coding	1.91942	1.92124	1.91986	1.91989	1.91949	-0.340593	0.744228	1
NM_145635	chr2	158502612	158508198	+	627	1	Adig|SMAF-1|Smaf1|-|2|2 H1|protein-coding	0.267385	0.267062	0.266536	0.26669	0.266761	-1.00914	0.575721	1
NM_172833	chr18	65430997	65478792	+	4990	1	Malt1|A630046N12|D430033E09Rik|Pcasp1|-|18|18 E1|protein-coding	9.61291	9.64522	9.64297	9.62193	9.62884	0.0111459	0.890355	0.999671
NM_145986	chr15	80671847	80700425	+	2986	1	Fam83f|AW544981|-|15|15 E1|protein-coding	-1.8673	-1.86725	-1.86709	-1.86731	-1.8673	0.479068	0.916367	1
NM_199064	chrX	8327424	8336235	+	867	1	Ssxb10|-|-|X|X A1.1|protein-coding	0	0	0	0	0	NA	1	1
NM_001005422	chr13	46273721	46300115	+	1356	1	Stmnd1|Gm1574|-|13|13 A5|protein-coding	0	0	0	0	0	NA	1	1
NM_029066	chr15	82298984	82314558	+	1310	1	Wbp2nl|4930521I23Rik|PAWP|-|15|15 E1|protein-coding	0	0	0	0	0	NA	1	1
NM_001098842	chrX	68892373	68893053	-	523	1	Gm6812|EG627927|-|X A7.1|X|protein-coding	0	0	0	0	0	NA	1	1
NM_146047	chr13	73604002	73620639	+	2359	1	Clptm1l|C130052I12Rik|Crr9|-|13|13 C1|protein-coding	12.0424	12.0622	12.0775	12.0499	12.0485	0.013496	0.749359	0.999671
NM_172397	chr11	106156256	106160142	-	2943	1	Limd2|0610025L06Rik|AI413966|-|11|11 E1|protein-coding	8.99673	8.98665	8.99312	8.99818	8.98562	0.00307268	0.974407	0.999671
NM_177075	chr11	46235557	46239871	+	2259	1	Fndc9|C030019I05Rik|-|11|11 B1.1|protein-coding	4.84276	4.84623	4.85083	4.84823	4.84264	0.230982	0.564598	1
NR_110455	chr6	51379710	51392791	+	1691	1	Gm6559|EG625167|-|6|6 B3|ncRNA	0	0	0	0	0	NA	1	1
NM_008231	chr3	87906321	87916132	+	2237	1	Hdgf|AI118077|D3Ertd299e|-|3 F1|3 38.78 cM|protein-coding	14.0931	14.1272	14.1319	14.135	14.0988	0.0186419	0.572434	0.999671
NM_009004	chr18	34624936	34633277	+	3452	1	Kif20a|AA415432|Rab6kifl|-|18 B1|18 18.69 cM|protein-coding	12.9681	12.9429	12.9744	12.9397	12.9234	-0.0163087	0.670107	0.999671
NM_001243837	chr15	4988762	5063773	-	2689	1	C7|A530026G17|Gm1238|-|15 A1|15 1.98 cM|protein-coding	-0.810325	-0.810208	-0.809865	-0.809751	-0.809698	1.96656	0.472354	1
NM_146381	chr2	111379002	111379937	+	934	1	Olfr1284|MOR245-13|-|2|2 E3|protein-coding	0	0	0	0	0	NA	1	1
NM_001289668	chr9	45937857	45955249	-	4273	1	Sidt2|B930096O19|BC023957|CGI-40|-|9|9 A5.2|protein-coding	11.5329	11.4848	11.4968	11.5009	11.4962	-0.0262936	0.588065	0.999671
NR_015464	chr2	91237146	91238357	+	890	1	A330069E16Rik|-|-|2|2 E1|ncRNA	5.81135	5.82485	5.80956	5.81316	5.80863	-0.313604	0.26661	1
NM_053272	chr4	106561038	106589113	+	4017	1	Dhcr24|2310076D10Rik|5830417J06Rik|mKIAA0018|-|4|4 C7|protein-coding	11.3161	11.2984	11.2668	11.3185	11.2906	-0.0360918	0.488224	0.999671
NM_009461	chr2	120860276	120970715	-	7712	1	Ubr1|AI504731|-|2 E5|2 60.37 cM|protein-coding	12.026	11.9621	11.9948	11.9403	11.9731	-0.050246	0.303872	0.999671
NM_146920	chr4	58784779	58785720	-	940	1	Olfr267|MOR262-1|-|4|4 B3|protein-coding	1.73183	1.73212	1.73218	1.72982	1.73126	-0.58584	0.604664	1
NM_001081099	chr4	134510999	134523922	+	1265	1	Aunip|2610002D18Rik|Clhc1|-|4|4 D3|protein-coding	9.05639	9.07665	9.06344	9.06336	9.04549	-0.0501605	0.59861	0.999671
NM_176923	chr8	111448784	111522107	-	5133	1	Wdr59|5430401O09Rik|Cdw12|-|8|8 E1|protein-coding	9.55388	9.55314	9.57036	9.58217	9.58879	0.120093	0.135076	0.973721
NM_138310	chr7	126585008	126589092	+	3593	1	Apobr|Apob-48r|Apob48r|-|7|7 F3|protein-coding	6.03254	6.04593	6.05467	6.03421	6.03934	0.128842	0.647701	1
NR_106113	chr11	78178827	78178887	+	60	1	Mir7653|Gm27900|mmu-mir-7653|-|11|11 B5|ncRNA	4.16144	4.15975	4.15946	4.16121	4.1599	-0.0539013	0.912137	1
NM_011580	chr2	118111876	118127133	+	5824	1	Thbs1|TSP-1|TSP1|Thbs-1|tbsp1|-|2 E5|2 59.34 cM|protein-coding	17.0118	16.9693	16.8804	16.8499	16.8923	-0.166705	6.34758e-08	4.77143e-05
NR_029879	chr9	71963441	71963460	+	19	1	Mir378a|Mir378|Mirn378|mmu-mir-378|mmu-mir-378a|-|18|18 E1|ncRNA	0.00784479	0.00814705	0.0076554	0.00779984	0.00786569	-0.484815	0.805642	1
NM_147019	chr2	86332416	86333354	-	937	1	Olfr1054|MOR188-2|-|2|2 D|protein-coding	0	0	0	0	0	NA	1	1
NM_178098	chr13	60842612	60864416	-	1363	1	4930486L24Rik|AW545031|-|13|13 B2|protein-coding	6.63744	6.64787	6.6434	6.64052	6.66128	0.142889	0.520233	1
NM_019516	chr19	7596661	7607176	-	2744	1	Lgals12|AW987437|Grip1|-|19|19 A|protein-coding	1.40079	1.40231	1.40089	1.40006	1.40216	-0.422629	0.738462	1
NM_009731	chr6	34412362	34423137	+	1236	1	Akr1b7|AR|Avdp|MVDP|-|6 B1|6 14.95 cM|protein-coding	-0.225475	-0.225186	-0.226199	-0.226151	-0.224781	-0.962289	0.670773	1
NM_145707	chr7	15625306	15639777	-	1596	1	Obox3|Ohx|-|7|7 A2|protein-coding	0	0	0	0	0	NA	1	1
NM_001290719	chrX	133946451	133981812	-	2940	1	Sytl4|Gph|Slp4|-|X|X E3|protein-coding	0	0	0	0	0	NA	1	1
NM_011103	chr14	30595354	30626208	-	2755	1	Prkcd|AI385711|D14Ertd420e|PKC[d]|PKCdelta|Pkcd|-|14 B|14 18.82 cM|protein-coding	10.7838	10.7801	10.8092	10.8185	10.8348	0.104993	0.0618188	0.825265
NM_173433	chr9	14462581	14500482	-	2658	1	Kdm4d|4932416A15|Jmjd2d|-|9|9 A2|protein-coding	2.07674	2.07904	2.07945	2.0803	2.07873	1.02357	0.354086	1
NM_001025240	chr8	43624975	43627185	-	2209	1	Gm5346|EG384813|-|8|8 A4|protein-coding	0	0	0	0	0	NA	1	1
NR_002847	chr19	5795690	5802672	-	6982	1	Malat1|2210401K01Rik|9430072K23Rik|AI647968|Neat2|-|19|19 A|ncRNA	18.2262	18.1625	18.1641	18.057	18.103	-0.122139	0.0657857	0.834284
NM_026181	chr7	35276544	35318440	-	3035	1	Gpatch1|1300003A17Rik|ECGP|Gpatc1|-|7|7 B2|protein-coding	10.1382	10.1134	10.1577	10.1089	10.1135	0.00355806	0.961118	0.999671
NM_146855	chr9	40126924	40128039	-	1113	1	Olfr985|MOR171-4|-|9|9 A5.1|protein-coding	0	0	0	0	0	NA	1	1
NM_001205034	chr10	77798387	77799133	-	745	1	Gm19668|-|-|10 C1|10 39.72 cM|protein-coding	0	0	0	0	0	NA	1	1
NM_008726	chr4	147985788	147987205	+	776	1	Nppb|AA408272|BNF|BNP|-|4 E2|4 78.57 cM|protein-coding	6.06643	6.076	6.05854	6.05267	6.05776	-0.509888	0.045138	1
NM_021396	chr19	29410919	29472927	+	3407	1	Pdcd1lg2|B7-DC|Btdc|F730015O22Rik|PD-L2|-|19|19 C1|protein-coding	0	0	0	0	0	NA	1	1
NM_027302	chrX	65047644	65049017	+	852	1	Ctag2|1700030B21Rik|-|X|X A7.1|protein-coding	0	0	0	0	0	NA	1	1
NM_011509	chr10	31413726	31414435	-	707	1	Supt4b|Gm3258|Supt4h1b|Supt4h2|-|10 A4|10 17.4 cM|protein-coding	0	0	0	0	0	NA	1	1
NM_010889	chr2	52136647	52338798	-	22330	1	Neb|AI595938|-|2 C1.1|2 29.98 cM|protein-coding	4.71613	4.70631	4.70808	4.70572	4.71233	-0.220796	0.600693	1
NM_010018	chr5	114003735	114025676	+	2006	1	Dao|AI987963|DAAO|DAMOX|Dao-1|Dao1|-|5 F|5 55.93 cM|protein-coding	-1.31071	-1.3111	-1.31081	-1.31123	-1.3112	-0.885712	0.795207	1
NM_026433	chr11	90030348	90036505	+	1759	1	Tmem100|1810057C19Rik|AV011897|-|11|11 C|protein-coding	0	0	0	0	0	NA	1	1
NM_019933	chr1	119658093	119837071	-	4677	1	Ptpn4|PTPMEG|Ptn4|TEP|TEP/mPTPMEG|hPTP-MEG|-|1 E2.3|1 52.39 cM|protein-coding	12.185	12.1606	12.2069	12.2083	12.1968	0.0587417	0.14456	0.973721
NM_053107	chr1	42952872	43035449	+	3856	1	Gpr45|9230112G11Rik|AW046772|-|1|1 B|protein-coding	-1.86732	-1.86725	-1.86736	-1.86702	-1.86731	0.479068	0.916367	1
NM_133933	chr6	88084473	88105304	+	3630	1	Rpn1|AU018702|D6Wsu137e|Rpn-1|-|6 D1|6 39.13 cM|protein-coding	13.4615	13.4922	13.5209	13.4931	13.4786	0.0343161	0.328597	0.999671
NM_177637	chr17	36772910	36776235	+	1376	1	H2-M10.5|6.9H|-|17 B1|17 19.16 cM|protein-coding	0	0	0	0	0	NA	1	1
NM_001163572	chr13	41606216	41641357	+	7165	1	Tmem170b|EG621976|-|13|13 A4|protein-coding	9.9139	9.88264	9.93065	9.90726	9.93428	0.0968712	0.197397	0.999671
NM_177359	chr17	32815453	32830261	-	6002	1	Zfp799|6030490I01Rik|-|17|17 B1|protein-coding	7.6979	7.69292	7.69182	7.68721	7.67414	-0.136087	0.359352	1
NM_001164528	chr1	166254139	166316832	+	8248	1	Ildr2|2810478N18Rik|3110063L10Rik|AI852300|D1Ertd471e|Dbsm1|ENSMUSG00000040612|Ll|-|1 H2.3|1 73.61 cM|protein-coding	-0.741476	-0.741268	-0.741642	-0.742157	-0.742141	-1.97748	0.434799	1
NR_045509	chr15	46324585	46373899	+	851	1	1700022A22Rik|4933413D07Rik|-|15|15 B3.3|ncRNA	0	0	0	0	0	NA	1	1
NM_145469	chr15	34572799	34678706	-	3812	1	Nipal2|9330161F08Rik|Npal2|-|15|15 B3.1|protein-coding	0	0	0	0	0	NA	1	1
NR_131981	chr1_GL456211_random	145347	165925	-	1450	1	LOC100041034|-|-|1|1|pseudo	0	0	0	0	0	NA	1	1
NR_052009	chr8	110882456	110902488	-	3948	1	Fuk|1110046B12Rik|AI303278|-|8|8 E1|protein-coding	9.53063	9.54386	9.52396	9.53455	9.50539	-0.0705989	0.391536	0.999671
NR_105976	chr3	36475461	36475524	-	63	1	Mir7009|Gm27472|mmu-mir-7009|-|3|3 B|ncRNA	-0.413871	-0.414413	-0.414036	-0.41391	-0.413852	0.583254	0.808096	1
NM_001009818	chr5	93093416	93175075	+	5154	1	Sept11|6230410I01Rik|AW548875|D5Ertd606e|-|5 E2|5 47.29 cM|protein-coding	13.542	13.5447	13.561	13.5392	13.5488	0.0104601	0.743309	0.999671
NM_020018	chrX	155053061	155061553	-	1558	1	Magea5|Mage-a5|-|X F3|X 72.38 cM|protein-coding	-1.31137	-1.31127	-1.31098	-1.3109	-1.31137	1.30074	0.705003	1
NM_011120	chr13	27708998	27716737	-	989	1	Prl7d1|Ghd19|PLF-RP|PRP|Plfr|-|13|13 A3.1|protein-coding	-0.798556	-0.799663	-0.799318	-0.799787	-0.799775	-1.7288	0.543418	1
NM_138676	chr7	27342133	27356008	-	2327	1	Shkbp1|B930062H15Rik|Sb1|-|7|7 A3|protein-coding	9.59977	9.60874	9.61117	9.60334	9.61181	0.0203358	0.795749	0.999671
NM_172659	chr2	27021365	27027998	-	2124	1	Slc2a6|A330096C23|F630103L12Rik|Glut6|Glut9|-|2|2 A3|protein-coding	6.19416	6.19063	6.20436	6.19048	6.19374	0.126638	0.615097	1
NM_172133	chr11	80154162	80178827	+	1584	1	Adap2|Centa2|-|11 B5|11 47.56 cM|protein-coding	-1.86732	-1.86725	-1.86737	-1.86734	-1.86698	0.479069	0.914707	1
NM_001198841	chr7	48830398	48848051	-	889	1	Csrp3|CRP3|MLP|MMLP|-|7|7 B4|protein-coding	-1.262	-1.26188	-1.26206	-1.26148	-1.26145	1.47959	0.649349	1
NM_001098836	chr11	102289300	102296629	-	3692	1	Atxn7l3|E030022H21Rik|-|11|11 D|protein-coding	11.7348	11.7212	11.7244	11.7548	11.7649	0.0411341	0.370638	0.999671
NM_001099348	chr4	42158842	42168603	-	1937.8	4	Gm13305|OTTMUSG00000011351|-|4 A5|4|protein-coding	0.120626	0.122473	0.120544	0.121887	0.121317	-0.6098	0.764623	1
NM_001145780	chr8	71366848	71369732	+	1056	1	Use1|2010315L10Rik|5730403H22Rik|AV002165|D12|Ed2|Q-snare|p31|-|8|8 B3.3|protein-coding	10.627	10.6177	10.5903	10.5852	10.5972	-0.0910494	0.117795	0.964871
NM_026479	chr11	53324689	53333301	+	1251	1	Zcchc10|2410141K03Rik|AA675321|D11Ertd416e|-|11 B1.3|11 31.92 cM|protein-coding	7.73315	7.75144	7.74106	7.7565	7.75296	0.0971466	0.513139	1
NR_029901	chr2	180398379	180398482	+	103	1	Mir133a-2|Mirn133a-2|mir-133a-2|-|2|2 H4|ncRNA	0	0	0	0	0	NA	1	1
NM_010326	chr11	70639122	70642055	+	2725	1	Gp1ba|GPIba|GPIbalpha|-|11 B3|11 43.2 cM|protein-coding	5.33405	5.3272	5.33136	5.32316	5.3299	-0.144363	0.666654	1
NM_029886	chr7	137375569	137410756	-	1119	1	9430038I01Rik|-|-|7|7 F4|protein-coding	7.84367	7.83914	7.85309	7.85405	7.85512	0.145494	0.297428	1
NM_008171	chr6	135729805	136173511	-	7488	1	Grin2b|AW490526|GluN2B|NR2B|Nmdar2b|-|6 G1|6 66.38 cM|protein-coding	3.64842	3.64748	3.64594	3.64844	3.64805	-0.0889431	0.878821	1
NR_121616	chr3	123526166	123690852	-	5513	1	Ndst3|4921531K01Rik|4930511P15Rik|N-HSST 3|NDST-3|-|3|3 G1|protein-coding	6.87224	6.85604	6.87145	6.8609	6.86859	0.0582439	0.772028	1
NM_019642	chr2	157279098	157326318	+	2697	1	Rpn2|1300012C06Rik|AV261018|Rpn-2|-|2 H1|2 78.2 cM|protein-coding	14.4946	14.4965	14.4843	14.4915	14.5039	-0.00344993	0.904906	0.999671
NM_207703	chr4	118808855	118809862	-	1006	1	Olfr1335|MOR259-12|MOR259-5|Olfr1334-ps1|Olfr1335-ps1|-|4|4 D2.1|protein-coding	0	0	0	0	0	NA	1	1
NM_010723	chr3	144188530	144205255	-	1697	1	Lmo4|A730077C12Rik|Crp3|Etohi4|-|3 H2|3 68.61 cM|protein-coding	10.7175	10.7519	10.7481	10.7704	10.7459	0.0567029	0.332656	0.999671
NM_001184969	chrX	37254878	37258798	+	643	3	Rhox3e|ENSMUSG00000071772|OTTMUSG00000017148|Rhox3.5|Rhox3d|-|X|X A3.3|protein-coding	0	0	0	0	0	NA	1	1
NM_013610	chr13	49187547	49196251	+	1126	1	Ninj1|AU024536|-|13|13 A5|protein-coding	9.93981	9.95874	9.97508	9.98748	9.98406	0.123892	0.0817104	0.885226
NM_001170853	chr1	173857220	173880187	-	1896	1	Mndal|Gm2785|Ifi212|-|1 H3|1|protein-coding	5.36859	5.37286	5.36547	5.36855	5.36496	-0.243943	0.44723	1
[truncated: 23,974 more rows]

## Sheet: RNA-seq_GRwt
Transcript/RepeatID	chr	start	end	strand	Length	Copies	Annotation/Divergence	GRWT_NT-rep1 (96383549.0 total)	GRWT_NT-rep2 (105341971.5 total)	GRWT_Dex-rep1 (63841028.0 total)	GRWT_Dex-rep2 (71181744.5 total)	GRWT_Dex-rep3 (50778577.0 total)	NT vs. Dex Log2 Fold Change	NT vs. Dex p-value	NT vs. Dex adj. p-value
[truncated: 24,537 more rows]

[truncated: 1 more sheets: RNA-seq_GRtetra]
