# Supplementary material for: Glucocorticoid receptor quaternary structure drives chromatin occupancy and transcriptional outcome
Source: HighWire-hosted journal article supplement (doi:10.1101/gr.244814.118), 2019-07-23
Supplement: Supplemental_Table_S2.xlsx [file Supplemental_Table_S2.xlsx]

## Sheet: Legend
Supplemental Table S2. HOMER de novo motif enrichment
The INFO sheet notes the applicable GR cluster for each of the 24 following sheets as well as the figure for which each cluster appears. The cluster motifs in each numbered sheet are sorted by motif p-value.

## Sheet: INFO
TableS2
HOMER de novo motif enrichment
Sheet	Figure	Cluster
1	-	C1
2	-	C3
3	Figure 1B	C4
4	Figure 1B	C5
5	Figure 1B	C6
6	Figure 4B	C6-shared-at-least-1
7	Figure 4B	C6-not-shared-pubGR
8	Figure 4E	C7 (C6-shared-liver)
9	Supplemental Figure S8B	C6-shared-macrophage
10	Supplemental Figure S8C	C6-shared-AtT20
11	Supplemental Figure S8D	C6-shared-3T3-L1 (WAT)
12	Supplemental Figure S8E	C6-shared-3T3-L1 (BAT)
13	Supplemental Figure S8F	C6-shared-MEF
14	Supplemental Figure S8G	C6-shared-mammary
15	Figure 5C	C9
16	Figure 5C	C10
17	Figure 5F	C10-shared-at-least-1
18	Figure 5F	C10-not-shared-pubGR
19	Supplemental Figure S10A	C10-shared-AtT20
20	Supplemental Figure S10B	C10-shared-mammary
21	Supplemental Figure S10C	C10-shared-macrophage
22	Supplemental Figure S10D	C10-shared-liver
23	Supplemental Figure S10E	C10-shared-3T3-L1 (BAT)
24	Supplemental Figure S10F	C10-shared-3T3-L1 (WAT)

## Sheet: 1
Homer de novo Motif Results (C1)
Total target sequences = 5923
Total background sequences = 43187
Rank	P-value	log P-pvalue	% of Targets	% of Background	Best Match/Details
1	1e-2579	-5939	0.4685	0.0392	GRE(NR),IR3/RAW264.7-GRE-ChIP-Seq(Unpublished)/Homer(0.913)
2	1e-994	-2289	0.2952	0.0476	Fra1(bZIP)/BT549-Fra1-ChIP-Seq(GSE46166)/Homer(0.993)
3	1e-295	-680	0.1676	0.0485	HINFP/MA0131.2/Jaspar(0.693)
4	1e-290	-669.1	0.217	0.0775	TEAD4/MA0809.1/Jaspar(0.928)
5	1e-208	-481.1	0.3226	0.1708	PB0104.1_Zscan4_1/Jaspar(0.605)
6	1e-203	-469	0.1926	0.0783	RUNX(Runt)/HPC7-Runx1-ChIP-Seq(GSE22178)/Homer(0.985)
7	1e-127	-293.8	0.1114	0.0423	EBF(EBF)/proBcell-EBF-ChIP-Seq(GSE21978)/Homer(0.950)
8	1e-100	-232.5	0.2255	0.1317	NFIA/MA0670.1/Jaspar(0.941)
9	1e-97	-223.5	0.1993	0.1127	AR-halfsite(NR)/LNCaP-AR-ChIP-Seq(GSE27824)/Homer(0.801)
10	1e-88	-204.6	0.1177	0.0553	CEBP(bZIP)/ThioMac-CEBPb-ChIP-Seq(GSE21512)/Homer(0.946)
11	1e-62	-144.3	0.0047	0	ZBTB7C/MA0695.1/Jaspar(0.631)
12	1e-58	-133.7	0.0044	0	PB0025.1_Glis2_1/Jaspar(0.746)
13	1e-56	-129.8	0.0054	0.0001	Hoxc9(Homeobox)/Ainv15-Hoxc9-ChIP-Seq(GSE21812)/Homer(0.663)
14	1e-51	-119.6	0.0063	0.0002	EWS:ERG-fusion(ETS)/CADO_ES1-EWS:ERG-ChIP-Seq(SRA014231)/Homer(0.652)
15	1e-49	-115.1	0.0379	0.013	Mef2d(MADS)/Retina-Mef2d-ChIP-Seq(GSE61391)/Homer(0.961)
16	1e-48	-112.7	0.1066	0.0603	NF1(CTF)/LNCAP-NF1-ChIP-Seq(Unpublished)/Homer(0.878)
17	1e-39	-91.83	0.0047	0.0001	NR4A2/MA0160.1/Jaspar(0.801)
18	1e-38	-88	0.0031	0	Egr1(Zf)/K562-Egr1-ChIP-Seq(GSE32465)/Homer(0.695)
19	1e-31	-72.36	0.0347	0.0148	PB0152.1_Nkx3-1_2/Jaspar(0.673)
20	1e-28	-65.11	0.0034	0.0001	MZF1/MA0056.1/Jaspar(0.682)
21	1e-27	-64.15	0.0031	0.0001	PH0089.1_Isx/Jaspar(0.613)
22	1e-21	-49.38	0.0031	0.0001	Unknown-ESC-element(?)/mES-Nanog-ChIP-Seq(GSE11724)/Homer(0.842)
23	1e-19	-45.96	0.0019	0	Arid3b/MA0601.1/Jaspar(0.619)
24	1e-16	-39.11	0.0039	0.0004	POL010.1_DCE_S_III/Jaspar(0.615)
25	1e-16	-37.8	0.0029	0.0002	POL006.1_BREu/Jaspar(0.665)
26	1e-12	-29.39	0.0031	0.0004	Hmx1/MA0896.1/Jaspar(0.767)

## Sheet: 2
Homer de novo Motif Results (C3)
Total target sequences = 11003
Total background sequences = 36439
Rank	P-value	log P-pvalue	% of Targets	% of Background	Best Match/Details
1	1e-4957	-11410	0.6393	0.086	GRE(NR),IR3/RAW264.7-GRE-ChIP-Seq(Unpublished)/Homer(0.913)
2	1e-943	-2173	0.1954	0.0372	Atf3(bZIP)/GBM-ATF3-ChIP-Seq(GSE33912)/Homer(0.985)
3	1e-207	-476.9	0.0773	0.0237	RUNX2(Runt)/PCa-RUNX2-ChIP-Seq(GSE33889)/Homer(0.960)
4	1e-146	-338.3	0.0724	0.0266	EBF(EBF)/proBcell-EBF-ChIP-Seq(GSE21978)/Homer(0.968)
5	1e-130	-299.4	0.0814	0.0342	CEBP(bZIP)/ThioMac-CEBPb-ChIP-Seq(GSE21512)/Homer(0.911)
6	1e-127	-292.5	0.3037	0.2103	NF1-halfsite(CTF)/LNCaP-NF1-ChIP-Seq(Unpublished)/Homer(0.897)
7	1e-117	-271.2	0.0052	0.0001	PB0193.1_Tcfe2a_2/Jaspar(0.670)
8	1e-111	-257.7	0.0908	0.0432	TEAD4(TEA)/Tropoblast-Tead4-ChIP-Seq(GSE37350)/Homer(0.886)
9	1e-108	-249	0.052	0.0188	AR-halfsite(NR)/LNCaP-AR-ChIP-Seq(GSE27824)/Homer(0.829)
10	1e-83	-191.8	0.0046	0.0001	Hoxc9(Homeobox)/Ainv15-Hoxc9-ChIP-Seq(GSE21812)/Homer(0.665)
11	1e-70	-161.3	0.004	0.0001	PB0201.1_Zfp281_2/Jaspar(0.587)
12	1e-68	-157	0.0039	0.0001	PB0030.1_Hnf4a_1/Jaspar(0.732)
13	1e-63	-146.7	0.0245	0.0076	MA0052.2_MEF2A/Jaspar(0.964)
14	1e-62	-144.7	0.0091	0.0011	FOXA1:AR(Forkhead,NR)/LNCAP-AR-ChIP-Seq(GSE27824)/Homer(0.559)
15	1e-46	-108	0.0032	0.0001	GFY(?)/Promoter/Homer(0.714)
16	1e-44	-102.7	0.004	0.0002	MA0519.1_Stat5a::Stat5b/Jaspar(0.654)
17	1e-43	-100.6	0.0031	0.0001	MA0472.1_EGR2/Jaspar(0.724)
18	1e-36	-83.91	0.0024	0.0001	NF1:FOXA1(CTF,Forkhead)/LNCAP-FOXA1-ChIP-Seq(GSE27824)/Homer(0.722)
19	1e-34	-79.27	0.003	0.0002	PH0089.1_Isx/Jaspar(0.612)
20	1e-33	-77.39	0.0019	0.0001	PB0123.1_Foxl1_2/Jaspar(0.610)
21	1e-28	-65.36	0.002	0.0001	PB0088.1_Tcfap2e_1/Jaspar(0.669)
22	1e-18	-41.82	0.0061	0.0018	SPDEF(ETS)/VCaP-SPDEF-ChIP-Seq(SRA014231)/Homer(0.721)
23	1e-15	-35.29	0.0016	0.0001	POL013.1_MED-1/Jaspar(0.681)
24	1e-13	-30	0.0014	0.0001	GSC(Homeobox)/FrogEmbryos-GSC-ChIP-Seq(DRA000576)/Homer(0.683)

## Sheet: 3
Homer de novo Motif Results (C4)
Total target sequences = 5923
Total background sequences = 43187
Rank	P-value	log P-pvalue	% of Targets	% of Background	Best Match/Details
1	1e-2579	-5939	0.4685	0.0392	GRE(NR),IR3/RAW264.7-GRE-ChIP-Seq(Unpublished)/Homer(0.913)
2	1e-994	-2289	0.2952	0.0476	Fra1(bZIP)/BT549-Fra1-ChIP-Seq(GSE46166)/Homer(0.993)
3	1e-295	-680	0.1676	0.0485	HINFP/MA0131.2/Jaspar(0.693)
4	1e-290	-669.1	0.217	0.0775	TEAD4/MA0809.1/Jaspar(0.928)
5	1e-208	-481.1	0.3226	0.1708	PB0104.1_Zscan4_1/Jaspar(0.605)
6	1e-203	-469	0.1926	0.0783	RUNX(Runt)/HPC7-Runx1-ChIP-Seq(GSE22178)/Homer(0.985)
7	1e-127	-293.8	0.1114	0.0423	EBF(EBF)/proBcell-EBF-ChIP-Seq(GSE21978)/Homer(0.950)
8	1e-100	-232.5	0.2255	0.1317	NFIA/MA0670.1/Jaspar(0.941)
9	1e-97	-223.5	0.1993	0.1127	AR-halfsite(NR)/LNCaP-AR-ChIP-Seq(GSE27824)/Homer(0.801)
10	1e-88	-204.6	0.1177	0.0553	CEBP(bZIP)/ThioMac-CEBPb-ChIP-Seq(GSE21512)/Homer(0.946)
11	1e-62	-144.3	0.0047	0	ZBTB7C/MA0695.1/Jaspar(0.631)
12	1e-58	-133.7	0.0044	0	PB0025.1_Glis2_1/Jaspar(0.746)
13	1e-56	-129.8	0.0054	0.0001	Hoxc9(Homeobox)/Ainv15-Hoxc9-ChIP-Seq(GSE21812)/Homer(0.663)
14	1e-51	-119.6	0.0063	0.0002	EWS:ERG-fusion(ETS)/CADO_ES1-EWS:ERG-ChIP-Seq(SRA014231)/Homer(0.652)
15	1e-49	-115.1	0.0379	0.013	Mef2d(MADS)/Retina-Mef2d-ChIP-Seq(GSE61391)/Homer(0.961)
16	1e-48	-112.7	0.1066	0.0603	NF1(CTF)/LNCAP-NF1-ChIP-Seq(Unpublished)/Homer(0.878)
17	1e-39	-91.83	0.0047	0.0001	NR4A2/MA0160.1/Jaspar(0.801)
18	1e-38	-88	0.0031	0	Egr1(Zf)/K562-Egr1-ChIP-Seq(GSE32465)/Homer(0.695)
19	1e-31	-72.36	0.0347	0.0148	PB0152.1_Nkx3-1_2/Jaspar(0.673)
20	1e-28	-65.11	0.0034	0.0001	MZF1/MA0056.1/Jaspar(0.682)
21	1e-27	-64.15	0.0031	0.0001	PH0089.1_Isx/Jaspar(0.613)
22	1e-21	-49.38	0.0031	0.0001	Unknown-ESC-element(?)/mES-Nanog-ChIP-Seq(GSE11724)/Homer(0.842)
23	1e-19	-45.96	0.0019	0	Arid3b/MA0601.1/Jaspar(0.619)
24	1e-16	-39.11	0.0039	0.0004	POL010.1_DCE_S_III/Jaspar(0.615)
25	1e-16	-37.8	0.0029	0.0002	POL006.1_BREu/Jaspar(0.665)
26	1e-12	-29.39	0.0031	0.0004	Hmx1/MA0896.1/Jaspar(0.767)

## Sheet: 4
Homer de novo Motif Results (C5)
Total target sequences = 3272
Total background sequences = 44886
Rank	P-value	log P-pvalue	% of Targets	% of Background	Best Match/Details
1	1e-1602	-3690	0.7995	0.1354	GRE(NR),IR3/RAW264.7-GRE-ChIP-Seq(Unpublished)/Homer(0.903)
2	1e-216	-497.9	0.1614	0.0297	Fra1(bZIP)/BT549-Fra1-ChIP-Seq(GSE46166)/Homer(0.986)
3	1e-105	-242.3	0.1889	0.072	AR-halfsite(NR)/LNCaP-AR-ChIP-Seq(GSE27824)/Homer(0.862)
4	1e-70	-161.8	0.1433	0.058	RUNX(Runt)/HPC7-Runx1-ChIP-Seq(GSE22178)/Homer(0.976)
5	1e-61	-142	0.1708	0.0809	FXR(NR),IR1/Liver-FXR-ChIP-Seq(Chong_et_al.)/Homer(0.680)
6	1e-57	-133	0.1119	0.0436	AR-halfsite(NR)/LNCaP-AR-ChIP-Seq(GSE27824)/Homer(0.646)
7	1e-42	-98	0.2998	0.1986	NF1-halfsite(CTF)/LNCaP-NF1-ChIP-Seq(Unpublished)/Homer(0.976)
8	1e-38	-87.99	0.0602	0.0205	PB0046.1_Mybl1_1/Jaspar(0.726)
9	1e-34	-78.5	0.0587	0.0212	AR-halfsite(NR)/LNCaP-AR-ChIP-Seq(GSE27824)/Homer(0.705)
10	1e-30	-70.04	0.2182	0.143	NFIC/MA0161.1/Jaspar(0.718)
11	1e-29	-66.94	0.0465	0.016	AR-halfsite(NR)/LNCaP-AR-ChIP-Seq(GSE27824)/Homer(0.680)
12	1e-22	-52.77	0.0064	0.0002	GFY(?)/Promoter/Homer(0.710)
13	1e-20	-46.39	0.0034	0	Hmx1/MA0896.1/Jaspar(0.709)
14	1e-18	-43.25	0.0098	0.0011	ETS:RUNX(ETS,Runt)/Jurkat-RUNX1-ChIP-Seq(GSE17954)/Homer(0.603)
15	1e-18	-42.96	0.048	0.0216	CEBPE/MA0837.1/Jaspar(0.930)
16	1e-18	-41.58	0.0254	0.0081	JUN/MA0488.1/Jaspar(0.858)
17	1e-17	-41.37	0.0031	0	PH0089.1_Isx/Jaspar(0.575)
18	1e-17	-39.66	0.0789	0.0447	Mef2d(MADS)/Retina-Mef2d-ChIP-Seq(GSE61391)/Homer(0.896)
19	1e-16	-38.45	0.0037	0.0001	Hoxc9(Homeobox)/Ainv15-Hoxc9-ChIP-Seq(GSE21812)/Homer(0.665)
20	1e-15	-36.03	0.004	0.0001	RORA(var.2)/MA0072.1/Jaspar(0.640)
21	1e-15	-34.61	0.092	0.057	MITF(bHLH)/MastCells-MITF-ChIP-Seq(GSE48085)/Homer(0.898)
22	1e-12	-29.84	0.0406	0.0201	TEAD3/MA0808.1/Jaspar(0.774)
23	1e-12	-29.7	0.0058	0.0006	TFAP2C(var.2)/MA0814.1/Jaspar(0.700)
24	1e-12	-29.19	0.011	0.0024	Chop(bZIP)/MEF-Chop-ChIP-Seq(GSE35681)/Homer(0.703)

## Sheet: 5
Homer de novo Motif Results (C6)
Total target sequences = 1808
Total background sequences = 43121
Rank	P-value	log P-pvalue	% of Targets	% of Background	Best Match/Details
1	1e-851	-1960	0.8131	0.1518	GRE(NR),IR3/RAW264.7-GRE-ChIP-Seq(Unpublished)/Homer(0.868)
2	1e-318	-732.3	0.7107	0.2778	MA0032.1_FOXC1/Jaspar(0.652)
3	1e-91	-211.7	0.3086	0.1256	MA0130.1_ZNF354C/Jaspar(0.770)
4	1e-38	-88.5	0.1338	0.0527	BATF(bZIP)/Th17-BATF-ChIP-Seq(GSE39756)/Homer(0.991)
5	1e-37	-86.69	0.078	0.0213	PB0207.1_Zic3_2/Jaspar(0.680)
6	1e-29	-67.27	0.0968	0.0368	MA0481.1_FOXP1/Jaspar(0.618)
7	1e-22	-51.72	0.0243	0.0034	POL009.1_DCE_S_II/Jaspar(0.693)
8	1e-21	-48.74	0.0918	0.0404	POL009.1_DCE_S_II/Jaspar(0.662)
9	1e-14	-33.99	0.0846	0.0424	MA0029.1_Mecom/Jaspar(0.606)
10	1e-14	-33.13	0.0265	0.0067	MA0154.2_EBF1/Jaspar(0.922)
11	1e-13	-31.85	0.0393	0.0137	Znf263(Zf)/K562-Znf263-ChIP-Seq(GSE31477)/Homer(0.722)

## Sheet: 6
Homer de novo Motif Results (C6-shared_atleastinONE)
Total target sequences = 1198
Total background sequences = 43975
Rank	P-value	log P-pvalue	% of Targets	% of Background	Best Match/Details
1	1e-574	-1324	0.8348	0.1481	GRE(NR),IR3/RAW264.7-GRE-ChIP-Seq(Unpublished)/Homer(0.864)
2	1e-59	-137.6	0.294	0.1134	PB0026.1_Gm397_1/Jaspar(0.616)
3	1e-53	-122.2	0.2327	0.0817	AR-halfsite(NR)/LNCaP-AR-ChIP-Seq(GSE27824)/Homer(0.633)
4	1e-50	-116.4	0.1536	0.0398	NR3C2/MA0727.1/Jaspar(0.620)
5	1e-35	-82	0.1634	0.058	Oct4:Sox17(POU,Homeobox,HMG)/F9-Sox17-ChIP-Seq(GSE44553)/Homer(0.655)
6	1e-31	-72.22	0.0604	0.0096	SOX10/MA0442.1/Jaspar(0.656)
7	1e-19	-45.88	0.0524	0.0118	JUND/MA0491.1/Jaspar(0.958)
8	1e-17	-40.63	0.1119	0.0476	Znf263(Zf)/K562-Znf263-ChIP-Seq(GSE31477)/Homer(0.722)
9	1e-14	-33.32	0.0524	0.0157	PB0173.1_Sox21_2/Jaspar(0.661)
10	1e-13	-30.24	0.0373	0.0092	SOX10/MA0442.1/Jaspar(0.607)

## Sheet: 7
Homer Known Motif Enrichment Results (C6-not-shared-with-published-mouse-GR-data)
Homer de novo Motif Results
Total target sequences = 610
Total background sequences = 43478
Rank	P-value	log P-pvalue	% of Targets	% of Background	Best Match/Details
1	1e-346	-797.6	0.7173	0.0839	GRE(NR),IR3/RAW264.7-GRE-ChIP-Seq(Unpublished)/Homer(0.857)
2	1e-68	-157.4	0.4286	0.145	PB0091.1_Zbtb3_1/Jaspar(0.576)
3	1e-33	-76.59	0.2188	0.0706	SOX10/MA0442.1/Jaspar(0.619)
4	1e-26	-62.08	0.1109	0.0232	AR-halfsite(NR)/LNCaP-AR-ChIP-Seq(GSE27824)/Homer(0.747)
5	1e-26	-61.03	0.1611	0.0482	Fosl2(bZIP)/3T3L1-Fosl2-ChIP-Seq(GSE56872)/Homer(0.976)
6	1e-24	-55.46	0.1018	0.0219	Foxo1(Forkhead)/RAW-Foxo1-ChIP-Seq(Fan_et_al.)/Homer(0.757)
7	1e-17	-40.82	0.1125	0.0346	PB0134.1_Hnf4a_2/Jaspar(0.701)
8	1e-13	-31.69	0.0593	0.0131	MEF2A/MA0052.3/Jaspar(0.930)

## Sheet: 8
Homer de novo Motif Results (C7)
Total target sequences = 584
Total background sequences = 44145
Rank	P-value	log P-pvalue	% of Targets	% of Background	Best Match/Details
1	1e-230	-531.5	0.7723	0.1631	GRE(NR),IR3/RAW264.7-GRE-ChIP-Seq(Unpublished)/Homer(0.850)
2	1e-115	-265.6	0.6027	0.177	THRb(NR)/Liver-NR1A2-ChIP-Seq(GSE52613)/Homer(0.703)
3	1e-26	-61.85	0.1678	0.0469	AR-halfsite(NR)/LNCaP-AR-ChIP-Seq(GSE27824)/Homer(0.682)
4	1e-20	-46.72	0.1045	0.0244	SOX10/MA0442.1/Jaspar(0.636)
5	1e-14	-32.57	0.0103	0	PB0149.1_Myb_2/Jaspar(0.670)
6	1e-13	-31.4	0.1062	0.035	PB0060.1_Smad3_1/Jaspar(0.669)

[truncated: 16 more sheets: 9, 10, 11, 12, 13, 14, 15, 16, 17, 18, 19, 20, 21, 22, 23, 24]
