# Supplementary material for: Glucocorticoid receptor quaternary structure drives chromatin occupancy and transcriptional outcome
Source: HighWire-hosted journal article supplement (doi:10.1101/gr.244814.118), 2019-07-23
Supplement: Supplemental_Table_S3.xlsx [file Supplemental_Table_S3.xlsx]

## Sheet: Legend
Supplemental Table S3. Utilized published datasets
Each row denotes a previously published genomic mouse dataset used in the manuscript for comparison to the GRwt and/or GRtetra datasets.

## Sheet: Table S3
Table S3. Utilized published datasets
Experiment	Cell line/type	Antibody	Treatment 1	Treatment 2	GEO/SRA series #	GEO/SRA sample #1	GEO/SRA sample #2	Reference
ChIP-seq	3134	GR	NT	-	SRP004871	SRX034860	SRX034861	John et al. 2011 Nat Genet
ChIP-seq	3134	GR	Dex	-	SRP004871	SRX034862	SRX034863	John et al. 2011 Nat Genet
ChIP-seq	3134	cJun	NT	-	SRP007111	SRX076097	SRX076098	Biddie et al. 2011 Mol Cell
ChIP-seq	3134	cJun	Dex	-	SRP007111	SRX076099	SRX076100	Biddie et al. 2011 Mol Cell
ChIP-seq	3134	BRG1	NT	-	GSE53585	GSM1296401	GSM1296402	Morris et al. 2014 Nat Struc Mol Biol
ChIP-seq	3134	BRG1	Dex	-	GSE94562	GSM2478328	GSM2478329	Johnson et al. 2017 Nucleic Acids Res
ChIP-seq	3134	p300	NT	-	GSE61236	GSM1611789	-	Stavreva et al. 2015 Genome Res
ChIP-seq	3134	p300	Dex	-	GSE61236	GSM1611790	-	Stavreva et al. 2015 Genome Res
ChIP-seq	Liver	INPUT	-	Wt	GSE59752	GSM1631178	GSM1631179	Lim et al. 2015 Genome Res
ChIP-seq	Liver	GR	-	Wt	GSE59752	GSM1446065	-	Lim et al. 2015 Genome Res
ChIP-seq	Liver	GR	NT	Adx	GSE46047	GSM1122513	GSM1122514	Grontved et al. 2013 EMBO J
ChIP-seq	Liver	GR	Dex	Adx	GSE46047	GSM1122512	GSM1122515	Grontved et al. 2013 EMBO J
ChIP-seq	Macrophage	INPUT	-	Wt	GSE59764	GSM1446194	-	Lim et al. 2015 Genome Res
ChIP-seq	Macrophage	GR	-	Wt	GSE59764	GSM1446192	-	Lim et al. 2015 Genome Res
ChIP-seq	Macrophage	GR	Dex	-	GSE31796	GSM788650	-	Uhlenhaut et al. 2013 Mol Cell
ChIP-seq	3T3-L1	INPUT	-	WAT differen.	GSE27826	GSM686983	-	Siersbaek et al. 2011 EMBO J
ChIP-seq	3T3-L1	GR	Dex	WAT differen.	GSE27826	GSM686976	-	Siersbaek et al. 2011 EMBO J
ChIP-seq	3T3-L1	GR	NT	BAT differen.	GSE76619	GSM2029172	-	Park and Ge 2017 Mol Cell Biol
ChIP-seq	3T3-L1	GR	Dex	BAT differen.	GSE76619	GSM2029174	GSM2029175	Park and Ge 2017 Mol Cell Biol
ChIP-seq	AtT-20	GR	NT	-	SRP004871	SRX034867	SRX034868	John et al. 2011 Nat Genet
ChIP-seq	AtT-20	GR	Dex	-	SRP004871	SRX034869	SRX034870	John et al. 2011 Nat Genet
ChIP-seq	MEF	GR	Dex	-	GSE69947	GSM1713750	GSM1713751	Sasse et al. 2015 J Biol Chem
ChIP-seq	MEF	H3K4me1	-	-	GSE90895	GSM2417085	-	Chronis et al. 2017 Cell
ChIP-seq	Mammary	INPUT	-	Lactation 1d	GSE72724	GSM1869155	-	Metser et al. 2016 Nucleic Acids Res
ChIP-seq	Mammary	GR	-	Pregnancy 13d	GSE74826	GSM2102920	GSM2102921	Shin et al. 2016 Nat Genet
Dnase-seq	3134	-	NT	-	SRP004871	SRX034802	SRX034804	John et al. 2011 Nat Genet
Dnase-seq	3134	-	Dex	-	SRP004871	SRX034811	SRX034818	John et al. 2011 Nat Genet
Dnase-seq	Liver	-	NT	Adx	GSE46047	GSM1122516	GSM1122517	Grontved et al. 2013 EMBO J
Dnase-seq	Liver	-	Dex	Adx	GSE46047	GSM1122518	GSM1122519	Grontved et al. 2013 EMBO J
ATAC-seq	MEF	-	NT	-	GSE90895	GSM2417068	-	Chronis et al. 2017 Cell
Mnase-seq	3134	-	NT	-	GSE92505	GSM2430825	GSM2430826	Johnson et al. 2017 Nucleic Acids Res
Mnase-seq	3134	-	Dex	-	GSE92505	GSM2430827	GSM2430828	Johnson et al. 2017 Nucleic Acids Res
