# Supplementary material for: Glucocorticoid receptor quaternary structure drives chromatin occupancy and transcriptional outcome
Source: HighWire-hosted journal article supplement (doi:10.1101/gr.244814.118), 2019-07-23
Supplement: Supplemental_Table_S4.xlsx [file Supplemental_Table_S4.xlsx]

## Sheet: Legend
Supplemental Table S4. Replicate correlation
Each row denotes a genomic mouse data replicate and associated relevant information. Where applicable, the Pearson Correlation Coefficient (PCC) is shown for replicates.

## Sheet: TableS4
Table S4 Replicate correlation
Type	Cell line	Replicate	Antibody	Treatment	Unique tags	PCC
ChIP	GRKO	rep1	Input	NA	32480678	NA
ChIP	GRKO	rep1	GR	NT	49279721	NA
ChIP	GRKO	rep2	GR	NT	45767428	NA
ChIP	GRKO	rep1	GR	Dex	42828200	NA
ChIP	GRKO	rep2	GR	Dex	52514237	NA
ChIP	GRKO	rep1	GFP	NT	53157819	NA
ChIP	GRKO	rep2	GFP	NT	48422953	NA
ChIP	GRKO	rep1	GFP	Dex	53436508	NA
ChIP	GRKO	rep2	GFP	Dex	30049596	NA
ChIP	GFP-GRwt	rep1	GR	NT	41664904	NA
ChIP	GFP-GRwt	rep2	GR	NT	34731666	NA
ChIP	GFP-GRwt	rep1	GR	Dex	55686679	0.85
ChIP	GFP-GRwt	rep2	GR	Dex	40394257
ChIP	GFP-GRwt	rep1	GFP	NT	48760222	NA
ChIP	GFP-GRwt	rep2	GFP	NT	35213520	NA
ChIP	GFP-GRwt	rep1	GFP	Dex	47163571	0.95
ChIP	GFP-GRwt	rep2	GFP	Dex	27853869
ChIP	GFP-GRtetra	rep1	GFP	NT	37738106	NA
ChIP	GFP-GRtetra	rep2	GFP	NT	24417666	NA
ChIP	GFP-GRtetra	rep1	GFP	Dex	43538415	0.97
ChIP	GFP-GRtetra	rep2	GFP	Dex	51257499
ChIP	GFP-GRwt	rep1	H3K27ac	NT	36431379	0.86
ChIP	GFP-GRwt	rep2	H3K27ac	NT	36619851
ChIP	GFP-GRwt	rep1	H3K27ac	Dex	32560872	0.98
ChIP	GFP-GRwt	rep2	H3K27ac	Dex	30647032
ChIP	GFP-GRtetra	rep1	H3K27ac	NT	29011719	0.91
ChIP	GFP-GRtetra	rep2	H3K27ac	NT	29011719
ChIP	GFP-GRtetra	rep1	H3K27ac	Dex	29011719	0.94
ChIP	GFP-GRtetra	rep2	H3K27ac	Dex	29011719
ChIP	GFP-GRwt	rep1	H3K4me1	NT	27387087	0.85
ChIP	GFP-GRwt	rep2	H3K4me1	NT	38457476
ChIP	GFP-GRwt	rep1	H3K4me1	Dex	29011719	0.96
ChIP	GFP-GRwt	rep2	H3K4me1	Dex	46105744
ChIP	GFP-GRtetra	rep1	H3K4me1	NT	28998249	0.99
ChIP	GFP-GRtetra	rep2	H3K4me1	NT	29110354
ChIP	GFP-GRtetra	rep1	H3K4me1	Dex	33707702	0.92
ChIP	GFP-GRtetra	rep2	H3K4me1	Dex	34384200
ChIP	GFP-GRwt	rep1	BRG1	NT	23088377	NA
ChIP	GFP-GRwt	rep1	BRG1	Dex	24153553	NA
ChIP	GFP-GRtetra	rep1	BRG1	NT	25509264	NA
ChIP	GFP-GRtetra	rep1	BRG1	Dex	19199674	NA
ChIP	MEFwt	rep1	GR	Dex	32757174	NA
ChIP	MEF-GRKO	rep1	GFP	Dex	7124403	NA
ChIP	MEF-GRKO	rep2	GFP	Dex	5333388	NA
ChIP	MEF-GFP-GRwt	rep1	GFP	Dex	10765608	0.6
ChIP	MEF-GFP-GRwt	rep2	GFP	Dex	5553504
ChIP	MEF-GFP-GRtetra	rep1	GFP	NT	4067379	NA
ChIP	MEF-GFP-GRtetra	rep2	GFP	NT	3428128	NA
ChIP	MEF-GFP-GRtetra	rep1	GFP	Dex	6741880	0.75
ChIP	MEF-GFP-GRtetra	rep2	GFP	Dex	5975613
ATAC	GFP-GRwt	rep1	NA	NT	54349974	0.97
ATAC	GFP-GRwt	rep2	NA	NT	53547710
ATAC	GFP-GRwt	rep1	NA	Dex	95578391	0.98
ATAC	GFP-GRwt	rep2	NA	Dex	62182485
ATAC	GFP-GRtetra	rep1	NA	NT	96261883	0.99
ATAC	GFP-GRtetra	rep2	NA	NT	89243125
ATAC	GFP-GRtetra	rep1	NA	Dex	137677785	0.97
ATAC	GFP-GRtetra	rep2	NA	Dex	34438762
RNA	Parental	rep1	NA	NT	48657556	0.97
RNA	Parental	rep2	NA	NT	4.04622e+07
RNA	Parental	rep1	NA	Dex	44590498	0.99
RNA	Parental	rep2	NA	Dex	6.09579e+07
RNA	Parental	rep3	NA	Dex	65533125
RNA	GRKO	rep1	NA	NT	53562573	0.99
RNA	GRKO	rep2	NA	NT	34011665
RNA	GRKO	rep1	NA	Dex	72996569	0.99
RNA	GRKO	rep2	NA	Dex	5.64572e+07
RNA	GRKO	rep3	NA	Dex	5.16674e+07
RNA	GFP-GRwt	rep1	NA	NT	96383549	0.99
RNA	GFP-GRwt	rep2	NA	NT	1.05342e+08
RNA	GFP-GRwt	rep1	NA	Dex	63841028	0.99
RNA	GFP-GRwt	rep2	NA	Dex	7.11817e+07
RNA	GFP-GRwt	rep3	NA	Dex	50778577
RNA	GFP-GRtetra	rep1	NA	NT	3.2467e+07	0.99
RNA	GFP-GRtetra	rep2	NA	NT	37989387
RNA	GFP-GRtetra	rep3	NA	NT	29864113
RNA	GFP-GRtetra	rep1	NA	Dex	35079736	0.98
RNA	GFP-GRtetra	rep2	NA	Dex	42272562
RNA	GFP-GRtetra	rep3	NA	Dex	31360091
NA=not applicable
PCC=pearson correlation coefficiency
